# Supplementary material for: Exploring the Contribution of Autophagy to the Excess-Sucrose Response in Arabidopsis thaliana
Source: Int J Mol Sci. 2022 Mar 31;23(7):3891. doi: 10.3390/ijms23073891 (PMC8999498; doi:10.3390/ijms23073891)
Supplement: Supplementary file 1 [file ijms-23-03891-s001.zip › Supplementary data.xlsx]

## Sheet: Supplementary data 1
Suuplementary data 1: specification of annotated metabolites following GC-MS analysis.
RT: retention time, in minutes; Putative name: putative identification of the metabolite; Molecular formula; molecular formula of the metabolite; Theor. m/z: quantifier ion m/z according to library; Found m/z: m/z detected in the experiment; m/s error (ppm): difference between theoretical and found m/z in ppm.
Peak no.	Retention time (RT)	Putative metabolite name	Metabolite class	Molecular formula	Theor. m/z	Found m/z	m/z error (ppm)
1	6.63	Proline	amino acid	C5H9NO2	172.143	172.145	-1.8
2	6.65	Glycine	amino acid	C2H5NO2	174.11	174.112	-1.6
3	6.68	Serine	amino acid	C3H7NO3	219.113	219.11	2.8
4	6.75	Phosphoric acid	inorganic acid	H3PO4	229.075	229.075	-0.8
5	6.94	Threonine	amino acid	C4H9NO3	219.113	219.11	3.4
6	7.31	Succinic acid	organic acid	C4H6O4	247.088	247.082	5.9
7	7.4	Fumaric acid	organic acid	C4H4O4	245.067	245.065	1.7
8	8.54	Aspartic acid	amino acid	C4H7NO4	160.072	160.078	-6.7
9	8.55	Malic acid	organic acid	C4H6O5	307.15	307.122	28.5
10	8.79	Methionine	amino acid	C5H11NO2S	178.07	178.076	-5.4
11	9.47	Glutamic acid	amino acid	C5H9NO4	246.139	246.137	2.1
12	9.53	alpha-Arabinose	Sugar	C5H10O5	305.147	305.141	5.6
13	9.53	Lyxose/Xylose	Sugar	C5H10O5	307.162	307.159	3.2
14	9.54	Ribitol	pentose alchohol	C5H12O5	217.011	217.112	-100.4
15	9.94	Alpha ketoglutaric acid	organic acid	C5H6O5	198.077	198.059	18.3
16	10.14	Phenylalanine	amino acid	C9H11NO2	146.058	146.064	-5.4
17	10.73	Ornithine	amino acid	C5H12N2O2	348.213	348.602	-388.9
18	10.83	Fructose	Sugar	C6H12O6	262.131	262.129	2.1
19	10.9	Shikimic acid	Cyclohexanecarboxylic acid	C7H10O5	372.198	372.16	38
20	10.92	Glucose	Sugar	C6H12O6	319.169	319.164	5.3
21	11.02	Citric acid	organic acid	C6H8O7	465.186	465.212	-25.5
22	11.32	Arginine	amino acid	C6H14N4O2	256.238	256.209	29.4
23	11.38	Lysine	amino acid	C6H14N2O2	156.063	156.076	-12.6
24	12.08	Tyrosine	amino acid	C9H11NO3	220.118	220.117	1.8
25	12.11	Myo inositol	Sugar	C6H12O6	305.14	305.141	-0.9
26	14.92	Tryptophan	amino acid	C11H12N2O2	202.105	202.125	-20.1
27	16.07	Sucrose	Sugar	C12H22O11	361.17	361.168	2.4
28	16.8	Trehalose	Sugar	C12H22O11	217.108	217.107	1.7

## Sheet: Supplementary data 2
Supplementary data 2: LFQ intensities of the atg5-1 and WT proteins profile under 3%. LFQ-label-free quantification. Values are presented in log value. Ratio and p-values were calculated using the Raw LFQ values.
p-value	Ratio of LFQ intensity atg5-3%/ WT-3%	Gene names	Fasta headers	LFQ intensity Atg5-1-3%-1	LFQ intensity Atg5-1-3%-2	LFQ intensity Atg5-1-3%-3	LFQ intensity Atg5-1-3%-5	LFQ intensity WT 3%-1	LFQ intensity WT 3%-2	LFQ intensity WT 3%-3	LFQ intensity WT 3%-5		-LOG(P-value)	log Difference
1.49727e-08	0.0205821		sp|Q9FGK0|NDUB8_ARATH NADH dehydrogenase [ubiquinone] 1 beta subcomplex subunit 8, mitochondrial OS=Arabidopsis thaliana OX=3702 GN=At5g47570 PE=2 SV=1	23.6888	23.9187	24.1338	23.7723	29.7451	29.273	29.4572	29.4482		7.8247	-5.60246
1.63747e-06	0.102243	RPL16	sp|Q95747|RM16_ARATH 60S ribosomal protein L16, mitochondrial OS=Arabidopsis thaliana OX=3702 GN=RPL16 PE=1 SV=3	23.6389	23.6965	23.5083	23.2357	26.9096	26.7405	26.4479	27.1411		5.78583	-3.28993
2.45253e-06	4.39659	PRA1B6	sp|Q9LYQ4|PR1B6_ARATH PRA1 family protein B6 OS=Arabidopsis thaliana OX=3702 GN=PRA1B6 PE=1 SV=1	25.3943	25.2583	25.2645	25.5509	23.077	23.1212	23.1925	23.5318		5.61039	2.13639
2.47523e-06	2.86079	ACBP2	sp|Q9STP8|ACBP2_ARATH Acyl-CoA-binding domain-containing protein 2 OS=Arabidopsis thaliana OX=3702 GN=ACBP2 PE=1 SV=1	26.8957	26.7589	26.6889	26.7664	25.3644	25.3131	25.0325	25.3343		5.60638	1.51641
4.95316e-06	1.36897	SCP2	sp|Q9FMN0|SCP2_ARATH Sterol carrier protein 2 OS=Arabidopsis thaliana OX=3702 GN=SCP2 PE=2 SV=1	29.1874	29.1298	29.177	29.1979	28.7838	28.7161	28.721	28.6588		5.30512	0.453088
6.42652e-06	1.22744		sp|O49299|PGMC1_ARATH Probable phosphoglucomutase, cytoplasmic 1 OS=Arabidopsis thaliana OX=3702 GN=At1g23190 PE=2 SV=2	30.4388	30.45	30.4905	30.4616	30.1697	30.1443	30.1342	30.21		5.19202	0.29565
1.0942e-05	146.415	F22K18.110	sp|Q9SB64|NBR1_ARATH Protein NBR1 homolog OS=Arabidopsis thaliana OX=3702 GN=NBR1 PE=1 SV=1	27.1701	28.0351	27.7582	26.9857	20.0106	21.7126	19.6255	19.8246		4.9609	7.19392
1.25971e-05	1.94692		sp|Q9SJF3|DCP1_ARATH mRNA-decapping enzyme-like protein OS=Arabidopsis thaliana OX=3702 GN=At1g08370 PE=1 SV=2	26.9569	26.8564	26.8328	26.9163	25.9372	25.8832	25.7861	26.1111		4.89973	0.961193
1.29899e-05	1.43227	CCH	sp|O82089|CCH_ARATH Copper transport protein CCH OS=Arabidopsis thaliana OX=3702 GN=CCH PE=1 SV=1	31.7631	31.7664	31.8715	31.6813	31.2531	31.2705	31.2577	31.2278		4.88639	0.518302
1.50011e-05	0.170494	RABA5A	sp|Q9FGK5|RAA5A_ARATH Ras-related protein RABA5a OS=Arabidopsis thaliana OX=3702 GN=RABA5A PE=1 SV=1	23.1882	23.953	23.8256	23.981	26.2661	26.2756	26.1171	26.4976		4.82388	-2.55221
1.50734e-05	1.33389	PLDALPHA1	sp|Q38882|PLDA1_ARATH Phospholipase D alpha 1 OS=Arabidopsis thaliana OX=3702 GN=PLDALPHA1 PE=1 SV=2	30.4555	30.4564	30.4102	30.4568	30.0218	29.9802	29.9964	30.1179		4.82179	0.415644
1.57837e-05	8.89089		sp|Q9LVA7|ICLN_ARATH Chloride conductance regulatory protein ICln OS=Arabidopsis thaliana OX=3702 GN=At5g62290 PE=2 SV=1	27.0396	26.8076	26.9079	26.6116	23.7955	23.9471	24.0162	22.9987		4.80179	3.15233
1.99462e-05	1.24389	PDIL1-4	sp|Q9FF55|PDI14_ARATH Protein disulfide isomerase-like 1-4 OS=Arabidopsis thaliana OX=3702 GN=PDIL1-4 PE=1 SV=1	29.6055	29.5797	29.5807	29.5997	29.3077	29.2619	29.2119	29.3247		4.70014	0.314855
4.72402e-05	1.22672	RABC1	sp|O23657|RABC1_ARATH Ras-related protein RABC1 OS=Arabidopsis thaliana OX=3702 GN=RABC1 PE=1 SV=1	29.0726	29.0689	29.1088	29.0675	28.7884	28.7918	28.7142	28.844		4.32569	0.294805
4.88422e-05	0.743173		sp|Q93WI0|STR12_ARATH Rhodanese-like/PpiC domain-containing protein 12, chloroplastic OS=Arabidopsis thaliana OX=3702 GN=At5g19370 PE=1 SV=1	25.1158	25.0868	25.1949	25.2414	25.5753	25.5329	25.615	25.6286		4.31121	-0.42823
6.69328e-05	1.6529	LKR/SDH	sp|Q9SMZ4|AASS_ARATH Alpha-aminoadipic semialdehyde synthase OS=Arabidopsis thaliana OX=3702 GN=LKR/SDH PE=1 SV=1	25.5647	25.779	25.8695	25.8126	24.9849	25.088	24.9642	25.0887		4.17436	0.725
7.23394e-05	2.48915	ATG8F	sp|Q8VYK7|ATG8F_ARATH Autophagy-related protein 8f OS=Arabidopsis thaliana OX=3702 GN=ATG8F PE=1 SV=1	24.8891	25.1363	25.2727	25.1529	23.4942	23.9539	23.9697	23.7705		4.14063	1.31565
7.47479e-05	0.665083	IMDH3	sp|Q9FMT1|LEU31_ARATH 3-isopropylmalate dehydrogenase 1, chloroplastic OS=Arabidopsis thaliana OX=3702 GN=IMDH1 PE=1 SV=1	29.1338	28.9691	28.9915	29.0688	29.7491	29.6432	29.5128	29.6115		4.1264	-0.588393
7.91588e-05	0.748187	BXL6	sp|Q9LXA8|BXL6_ARATH Probable beta-D-xylosidase 6 OS=Arabidopsis thaliana OX=3702 GN=BXL6 PE=2 SV=1	26.0059	25.9732	26.0555	26.1734	26.461	26.4725	26.4631	26.4855		4.1015	-0.418529
8.00187e-05	1.49886	VIP1	sp|Q9MA75|VIP1_ARATH Transcription factor VIP1 OS=Arabidopsis thaliana OX=3702 GN=VIP1 PE=1 SV=1	25.7484	25.7916	25.885	25.6914	25.2404	25.077	25.2915	25.1722		4.09681	0.583866
9.00383e-05	1.38838	CAD5	sp|O49482|CADH5_ARATH Cinnamyl alcohol dehydrogenase 5 OS=Arabidopsis thaliana OX=3702 GN=CAD5 PE=1 SV=1	28.3766	28.4069	28.3603	28.2104	27.9359	27.8209	27.8286	27.8753		4.04557	0.4734
0.000102665	1.22974	OMT1	sp|Q9FK25|OMT1_ARATH Flavone 3-O-methyltransferase 1 OS=Arabidopsis thaliana OX=3702 GN=OMT1 PE=1 SV=1	30.4249	30.425	30.4552	30.4428	30.2333	30.113	30.0897	30.1187		3.98858	0.298348
0.000102839	1.22992	MMT1	sp|Q9LTB2|MMT1_ARATH Methionine S-methyltransferase OS=Arabidopsis thaliana OX=3702 GN=MMT1 PE=1 SV=1	28.4208	28.4909	28.4305	28.5131	28.1738	28.168	28.1012	28.218		3.98784	0.298564
0.000107833	0.761259	RBP47B	sp|Q8VXZ9|R47BP_ARATH Polyadenylate-binding protein RBP47B OS=Arabidopsis thaliana OX=3702 GN=RBP47B PE=2 SV=1	26.3797	26.3743	26.3671	26.3229	26.8212	26.793	26.7717	26.6324		3.96725	-0.39354
0.000111332	1.40732	CYTB5-E	sp|Q42342|CYB5E_ARATH Cytochrome b5 isoform E OS=Arabidopsis thaliana OX=3702 GN=CYTB5-E PE=1 SV=2	30.4732	30.3883	30.4628	30.3533	29.9232	29.8491	29.8736	30.0599		3.95338	0.492949
0.000119176	1.34157	SSL9	sp|Q9M1J6|SSL9_ARATH Protein STRICTOSIDINE SYNTHASE-LIKE 9 OS=Arabidopsis thaliana OX=3702 GN=SSL9 PE=2 SV=1	28.0593	28.0404	27.983	27.9579	27.563	27.4795	27.6329	27.6695		3.92381	0.423927
0.000120867	1.32777	PPCS1	sp|Q8GXR5|PPCS1_ARATH Phosphopantothenate--cysteine ligase 1 OS=Arabidopsis thaliana OX=3702 GN=PPCS1 PE=2 SV=1	25.1617	25.1883	25.2131	25.0523	24.8235	24.7489	24.6776	24.7295		3.91769	0.409008
0.00012951	0.660411	PMD1	sp|Q9LXR8|PMD1_ARATH Peroxisomal and mitochondrial division factor 1 OS=Arabidopsis thaliana OX=3702 GN=PMD1 PE=1 SV=1	24.2266	24.4265	24.3748	24.3103	24.9492	25.0522	24.9406	24.7905		3.8877	-0.598563
0.000135139	1.31921	STR2	sp|Q24JL3|STR2_ARATH Thiosulfate/3-mercaptopyruvate sulfurtransferase 2 OS=Arabidopsis thaliana OX=3702 GN=STR2 PE=1 SV=1	26.7473	26.8159	26.6988	26.748	26.363	26.4608	26.2846	26.303		3.86922	0.399671
0.000138454	1.31919	APX3	sp|Q42564|APX3_ARATH L-ascorbate peroxidase 3 OS=Arabidopsis thaliana OX=3702 GN=APX3 PE=1 SV=1	29.083	29.1011	28.9609	28.9813	28.6284	28.7183	28.581	28.6001		3.85869	0.399649
0.000146112	1.24181	At1g12050	sp|Q8RW90|FAH_ARATH Fumarylacetoacetase OS=Arabidopsis thaliana OX=3702 GN=FAH PE=1 SV=1	27.829	27.9215	27.868	27.8094	27.5599	27.5878	27.4647	27.5657		3.83531	0.31244
0.000146876	4.36074	ATG8A	sp|Q8LEM4|ATG8A_ARATH Autophagy-related protein 8a OS=Arabidopsis thaliana OX=3702 GN=ATG8A PE=1 SV=2	27.1636	26.6074	27.0614	27.4529	25.0236	24.4517	25.3058	25.0058		3.83305	2.12457
0.000173177	1.44297	GAD1	sp|Q42521|DCE1_ARATH Glutamate decarboxylase 1 OS=Arabidopsis thaliana OX=3702 GN=GAD1 PE=1 SV=2	30.5689	30.6563	30.6698	30.5394	30.1269	30.214	29.9764	30.001		3.76151	0.529038
0.000174193	0.734223	FLA8	sp|O22126|FLA8_ARATH Fasciclin-like arabinogalactan protein 8 OS=Arabidopsis thaliana OX=3702 GN=FLA8 PE=2 SV=1	28.5915	28.5574	28.4871	28.3554	28.962	28.9679	28.9039	28.9405		3.75897	-0.44571
0.000182486	1.5773	ERD14	sp|P42763|ERD14_ARATH Dehydrin ERD14 OS=Arabidopsis thaliana OX=3702 GN=ERD14 PE=1 SV=1	30.07	30.0654	30.0029	30.1554	29.4329	29.2046	29.4791	29.5471		3.73877	0.657455
0.000183568	1.50466	BAM1	sp|Q9LIR6|BAM1_ARATH Beta-amylase 1, chloroplastic OS=Arabidopsis thaliana OX=3702 GN=BAM1 PE=1 SV=1	26.3608	26.4118	26.5418	26.3109	25.7871	25.9387	25.8523	25.6895		3.7362	0.589437
0.000187057	0.316096		sp|Q681K2|ATS3A_ARATH Embryo-specific protein ATS3A OS=Arabidopsis thaliana OX=3702 GN=ATS3A PE=1 SV=1	26.4294	26.2856	26.8517	26.4289	28.2466	28.5252	28.1356	27.7345		3.72803	-1.66157
0.000197458	0.828444	VHA-B1;VHA-B3	sp|P11574|VATB1_ARATH V-type proton ATPase subunit B1 OS=Arabidopsis thaliana OX=3702 GN=VHA-B1 PE=2 SV=2;sp|Q8W4E2|VATB3_ARATH V-type proton ATPase subunit B3 OS=Arabidopsis thaliana OX=3702 GN=VHA-B3 PE=2 SV=1	30.9977	30.96	30.9799	30.9415	31.2068	31.2877	31.3005	31.1703		3.70453	-0.271524
0.000203987	1.24773	TPS7	sp|Q9LMI0|TPS7_ARATH Probable alpha,alpha-trehalose-phosphate synthase [UDP-forming] 7 OS=Arabidopsis thaliana OX=3702 GN=TPS7 PE=1 SV=1	27.1158	27.1639	27.0937	27.1091	26.8767	26.8397	26.7073	26.7817		3.6904	0.319311
0.000241901	1.30563	STL2P	sp|Q39221|STLP2_ARATH SEC12-like protein 2 OS=Arabidopsis thaliana OX=3702 GN=STL2P PE=1 SV=4	28.0141	28.0042	27.9719	27.8638	27.5654	27.626	27.4833	27.6404		3.61636	0.384745
0.000271281	1.2459	OOP	sp|Q94AM1|OOPDA_ARATH Organellar oligopeptidase A, chloroplastic/mitochondrial OS=Arabidopsis thaliana OX=3702 GN=OOP PE=1 SV=1	27.8097	27.8726	27.8711	27.6992	27.5144	27.4709	27.5051	27.4936		3.56658	0.317183
0.000286412	1.5693	PAS1	sp|Q7DMA9|PAS1_ARATH Peptidyl-prolyl cis-trans isomerase PASTICCINO1 OS=Arabidopsis thaliana OX=3702 GN=PAS1 PE=1 SV=2	27.2246	27.0661	26.9789	26.8744	26.3058	26.4503	26.3126	26.4749		3.54301	0.650124
0.000288272	1.53475	GC6	sp|B0F9L4|GOGC6_ARATH Golgin candidate 6 OS=Arabidopsis thaliana OX=3702 GN=GC6 PE=1 SV=2	27.1822	27.2438	27.1695	27.2063	26.6385	26.6259	26.3482	26.7171		3.5402	0.618008
0.000292799	1.3278	ACLA-3	sp|O80526|ACLA3_ARATH ATP-citrate synthase alpha chain protein 3 OS=Arabidopsis thaliana OX=3702 GN=ACLA-3 PE=2 SV=1	29.0663	29.0681	29.0811	29.009	28.7359	28.7388	28.5496	28.5641		3.53343	0.409033
0.000296329	0.0312378	RPL37B;RPL37C;RPL37A	sp|Q43292|RL372_ARATH 60S ribosomal protein L37-2 OS=Arabidopsis thaliana OX=3702 GN=RPL37B PE=3 SV=2;sp|Q8LEM8|RL373_ARATH 60S ribosomal protein L37-3 OS=Arabidopsis thaliana OX=3702 GN=RPL37C PE=3 SV=1;sp|Q8LFH7|RL371_ARATH 60S ribosomal protein L37-1 OS	25.9323	23.0986	23.9043	23.7044	29.2399	29.3613	29.6312	28.4094		3.52823	-5.00057
0.000303719	1.21928	GAL1	sp|Q9SEE5|GALK1_ARATH Galactokinase OS=Arabidopsis thaliana OX=3702 GN=GAL1 PE=1 SV=2	28.2772	28.2948	28.2724	28.1435	27.9416	28.0096	27.9466	27.9459		3.51753	0.286035
0.000307638	1.38511	RD21A	sp|P43297|RD21A_ARATH Cysteine proteinase RD21A OS=Arabidopsis thaliana OX=3702 GN=RD21A PE=1 SV=1	32.0594	32.0175	32.0884	32.1741	31.5331	31.5107	31.7162	31.6995		3.51196	0.47
0.000310411	1.4042	ACA1	sp|Q37145|ACA1_ARATH Calcium-transporting ATPase 1 OS=Arabidopsis thaliana OX=3702 GN=ACA1 PE=1 SV=3	26.8776	27.0281	26.9694	26.7659	26.3715	26.5001	26.361	26.4494		3.50806	0.489747
0.000312306	1.61269	PEX11C	sp|Q9LQ73|PX11C_ARATH Peroxisomal membrane protein 11C OS=Arabidopsis thaliana OX=3702 GN=PEX11C PE=1 SV=1	26.8841	26.7935	26.8035	26.7303	26.2129	26.2811	26.0758	25.8838		3.50542	0.689472
0.000314342	0.770112	VHA-H	sp|Q9LX65|VATH_ARATH V-type proton ATPase subunit H OS=Arabidopsis thaliana OX=3702 GN=VHA-H PE=1 SV=1	29.9231	29.9109	29.9577	29.8497	30.3193	30.366	30.1552	30.3083		3.5026	-0.37686
0.00034048	1.29097	SDRA	sp|Q9S9W2|SDRA_ARATH Short-chain dehydrogenase/reductase SDRA OS=Arabidopsis thaliana OX=3702 GN=SDRA PE=1 SV=1	28.4698	28.4481	28.4061	28.2857	28.088	28.0819	27.9801	27.9859		3.46791	0.368459
0.000343168	1.44084	TMN1	sp|Q940G0|TMN1_ARATH Transmembrane 9 superfamily member 1 OS=Arabidopsis thaliana OX=3702 GN=TMN1 PE=1 SV=1	29.2422	29.0991	29.0526	29.1626	28.5462	28.5544	28.5572	28.791		3.46449	0.526912
0.0003491	1.35998		sp|Q9SZ83|Y4967_ARATH Uncharacterized oxidoreductase At4g09670 OS=Arabidopsis thaliana OX=3702 GN=At4g09670 PE=1 SV=1	27.3467	27.331	27.3628	27.2387	26.9101	26.9669	26.9101	26.7178		3.45705	0.443591
0.000361173	0.479046		sp|Q0JMD4|P2C03_ORYS;sp|Q7XTC7|P2C40_ORYSJ Probable protein phosphatase 2C 40 OS=Oryza sativa subsp. japonica OX=39947 GN=Os04g0449400 PE=3 SV=3;sp|Q9FX08|P2C12_ARATH Probable protein phosphatase 2C 12 OS=Arabidopsis thaliana OX=3702 GN=At1g47380 PE=2 SV=1	23.6966	23.5738	23.4006	23.7868	24.5942	24.5651	25.0363	24.5094		3.44229	-1.06177
0.000362195	1.32095	GDI1	sp|Q96254|GDI1_ARATH Guanosine nucleotide diphosphate dissociation inhibitor 1 OS=Arabidopsis thaliana OX=3702 GN=GDI1 PE=1 SV=1	29.4442	29.6286	29.5332	29.423	29.1162	29.1083	29.0263	29.1719		3.44106	0.401579
0.000407819	1.58262	LIGB	sp|Q949R4|DIOXL_ARATH Extradiol ring-cleavage dioxygenase OS=Arabidopsis thaliana OX=3702 GN=LIGB PE=2 SV=1	27.6367	27.7483	27.5735	27.7533	27.2124	27.0206	26.8061	27.0235		3.38953	0.662312
0.000416176	0.702237	RPS10C	sp|Q9LTF2|RS103_ARATH 40S ribosomal protein S10-3 OS=Arabidopsis thaliana OX=3702 GN=RPS10C PE=1 SV=2	29.7064	29.8727	29.6439	29.6906	30.0941	30.2551	30.3478	30.2564		3.38072	-0.50997
0.000442334	2.25583	T16H5.170	sp|O81862|CHIC_ARATH Class V chitinase OS=Arabidopsis thaliana OX=3702 GN=ChiC PE=1 SV=1	28.6388	28.7299	28.5907	28.6187	27.6287	27.8386	27.3378	27.0784		3.35425	1.17366
0.000496213	1.76488	GSTL1	sp|Q6NLB0|GSTL1_ARATH Glutathione S-transferase L1 OS=Arabidopsis thaliana OX=3702 GN=GSTL1 PE=2 SV=1	27.0253	27.0496	27.0685	26.7748	26.4056	26.2353	26.0023	25.9966		3.30433	0.819572
0.000497739	1.46496	CML27	sp|Q9LE22|CML27_ARATH Probable calcium-binding protein CML27 OS=Arabidopsis thaliana OX=3702 GN=CML27 PE=1 SV=1	25.9821	26.1969	26.2581	26.1075	25.6096	25.5741	25.4465	25.711		3.303	0.550861
0.000505843	1.45259	AGD2	sp|Q84M96|ALKR2_ARATH Probable aldo-keto reductase 2 OS=Arabidopsis thaliana OX=3702 GN=AGD2 PE=2 SV=1	27.8746	28.0515	27.9179	27.8449	27.3371	27.4019	27.2427	27.5526		3.29598	0.538626
0.00052063	1.36889	GGAT2	sp|Q9S7E9|GGT2_ARATH Glutamate--glyoxylate aminotransferase 2 OS=Arabidopsis thaliana OX=3702 GN=GGAT2 PE=1 SV=1	28.2769	28.2375	28.3841	28.1269	27.7808	27.9253	27.7482	27.7591		3.28347	0.453003
0.000583078	1.37574	CBSCBS2	sp|Q9CAR3|KINGL_ARATH SNF1-related protein kinase regulatory subunit gamma-1-like OS=Arabidopsis thaliana OX=3702 GN=CBSCBS2 PE=1 SV=1	26.0949	26.217	26.2836	25.9839	25.7118	25.6513	25.6448	25.7306		3.23427	0.460209
0.000589175	1.26497		sp|Q9SHJ8|HIBC8_ARATH 3-hydroxyisobutyryl-CoA hydrolase-like protein 5 OS=Arabidopsis thaliana OX=3702 GN=At1g06550 PE=1 SV=2	28.3651	28.3122	28.2737	28.2782	27.9172	28.1003	27.888	27.9674		3.22976	0.339103
0.000593089	0.669835	RPL35B	sp|O80626|RL352_ARATH 60S ribosomal protein L35-2 OS=Arabidopsis thaliana OX=3702 GN=RPL35B PE=2 SV=1	29.1904	29.0665	29.0631	29.1087	29.5205	29.6686	29.6375	29.9144		3.22688	-0.578122
0.00060253	1.42119	CSLE1	sp|Q8VZK9|CSLE1_ARATH Cellulose synthase-like protein E1 OS=Arabidopsis thaliana OX=3702 GN=CSLE1 PE=2 SV=1	28.2618	28.3335	28.4058	28.0886	27.8476	27.6929	27.8067	27.7142		3.22002	0.507095
0.000606176	1.40944	TTL	sp|Q9LVM5|TTHL_ARATH Uric acid degradation bifunctional protein TTL OS=Arabidopsis thaliana OX=3702 GN=TTL PE=1 SV=1	26.5096	26.6498	26.6237	26.3824	26.1405	26.0276	25.932	26.0848		3.2174	0.495127
0.000623708	1.38285		sp|Q8LGI2|SCPDL_ARATH Probable mitochondrial saccharopine dehydrogenase-like oxidoreductase At5g39410 OS=Arabidopsis thaliana OX=3702 GN=At5g39410 PE=1 SV=2	27.2001	27.3417	27.1935	27.146	26.8347	26.5862	26.8298	26.76		3.20502	0.467646
0.000630811	0.570932	VHA-G2	sp|O82629|VATG2_ARATH V-type proton ATPase subunit G2 OS=Arabidopsis thaliana OX=3702 GN=VHA-G2 PE=1 SV=2	27.9838	27.9196	27.9505	28.1298	28.724	29.1484	28.6844	28.6613		3.2001	-0.808609
0.000635399	0.563514	EXPA11	sp|Q9LNU3|EXP11_ARATH Expansin-A11 OS=Arabidopsis thaliana OX=3702 GN=EXPA11 PE=2 SV=1	26.1711	26.2256	26.0369	26.4293	26.7822	27.1214	27.0244	27.2449		3.19695	-0.827477
0.000649665	1.26976	SEC13A	sp|Q9SRI1|SC13A_ARATH Protein transport protein SEC13 homolog A OS=Arabidopsis thaliana OX=3702 GN=SEC13A PE=1 SV=1	27.8175	27.6861	27.8234	27.6707	27.5054	27.3843	27.3685	27.3612		3.18731	0.344553
0.000663151	1.25955	At3g13235	sp|Q1EBV4|DDI1_ARATH Protein DNA-DAMAGE INDUCIBLE 1 OS=Arabidopsis thaliana OX=3702 GN=DDI1 PE=1 SV=1	27.8184	27.7777	27.7107	27.8221	27.4686	27.52	27.3188	27.4898		3.17839	0.332909
0.000666994	0.795631	GGH2	sp|O65355|GGH2_ARATH Gamma-glutamyl hydrolase 2 OS=Arabidopsis thaliana OX=3702 GN=GGH2 PE=1 SV=2	26.5267	26.6787	26.5985	26.6642	27.0337	26.9578	26.9457	26.8502		3.17588	-0.329828
0.000694573	1.23542	F3F19.4	sp|Q9SAD7|IF4B2_ARATH Eukaryotic translation initiation factor 4B2 OS=Arabidopsis thaliana OX=3702 GN=EIF4B2 PE=1 SV=1	26.9363	26.9537	26.9883	27.1096	26.718	26.6403	26.6528	26.7567		3.15828	0.304997
0.000698629	0.650552		sp|Q9C944|H2AV3_ARATH Probable histone H2A variant 3 OS=Arabidopsis thaliana OX=3702 GN=At1g52740 PE=1 SV=1	26.9432	26.6381	26.8069	26.87	27.639	27.2995	27.4126	27.3881		3.15575	-0.620264
0.000709133	1.44289	PRA1A3	sp|Q8W115|PR1A3_ARATH PRA1 family protein A3 OS=Arabidopsis thaliana OX=3702 GN=PRA1A3 PE=2 SV=1	25.2217	25.2277	25.1968	25.0592	24.8108	24.7307	24.5169	24.5312		3.14927	0.528963
0.000741249	1.32155	F24J8.3	sp|Q9LPL6|TOL3_ARATH TOM1-like protein 3 OS=Arabidopsis thaliana OX=3702 GN=TOL3 PE=1 SV=1	26.7905	26.7016	26.6192	26.8686	26.4146	26.2581	26.3751	26.3231		3.13004	0.402235
0.000784185	0.710453	IPMI2	sp|Q9ZW84|LEUD1_ARATH 3-isopropylmalate dehydratase small subunit 2 OS=Arabidopsis thaliana OX=3702 GN=SSU2 PE=1 SV=1	28.8277	28.5723	28.5348	28.6957	29.2111	29.0315	29.1444	29.2163		3.10558	-0.49319
0.00078424	1.50513	CAT1	sp|Q96528|CATA1_ARATH Catalase-1 OS=Arabidopsis thaliana OX=3702 GN=CAT1 PE=1 SV=3	27.5113	27.7133	27.8957	27.6033	27.0498	27.0256	27.0619	27.2267		3.10555	0.589887
0.000788472	1.33875	SOX	sp|Q9S850|SUOX_ARATH Sulfite oxidase OS=Arabidopsis thaliana OX=3702 GN=SOX PE=1 SV=1	28.4179	28.4431	28.4196	28.2683	28.0286	28.0785	27.8357	27.9226		3.10321	0.420886
0.000802826	0.709219	M4E13.120	sp|O49613|HIP25_ARATH Heavy metal-associated isoprenylated plant protein 25 OS=Arabidopsis thaliana OX=3702 GN=HIPP25 PE=2 SV=1	26.0963	26.1674	26.0086	26.0017	26.7591	26.5524	26.5105	26.4347		3.09538	-0.495696
0.000806134	1.22706	ALDH10A9	sp|Q9STS1|BADH2_ARATH Betaine aldehyde dehydrogenase 2, mitochondrial OS=Arabidopsis thaliana OX=3702 GN=ALDH10A9 PE=1 SV=1	29.0275	29.0285	29.0834	29.0554	28.6841	28.887	28.7348	28.7082		3.09359	0.295201
0.000840889	1.28834	FAAH	sp|Q7XJJ7|FAAH_ARATH Fatty acid amide hydrolase OS=Arabidopsis thaliana OX=3702 GN=FAAH PE=1 SV=1	27.7706	27.8375	27.7859	27.6879	27.4058	27.4801	27.2617	27.4724		3.07526	0.365516
0.000854604	1.26836	HSP70-17	sp|F4JMJ1|HSP7R_ARATH Heat shock 70 kDa protein 17 OS=Arabidopsis thaliana OX=3702 GN=HSP70-17 PE=2 SV=1	28.1606	28.2588	28.1109	28.1794	27.8796	27.8022	27.7208	27.9351		3.06824	0.34296
0.000878301	1.31553		sp|O04420|URIC_ARATH Uricase OS=Arabidopsis thaliana OX=3702 GN=At2g26230 PE=1 SV=2	27.9355	28.0513	28.0136	27.8531	27.5239	27.7041	27.5558	27.4871		3.05636	0.395645
0.00088855	1.35923	LCAT4	sp|Q71N54|LCAT4_ARATH Lecithin-cholesterol acyltransferase-like 4 OS=Arabidopsis thaliana OX=3702 GN=LCAT4 PE=1 SV=1	24.4401	24.4588	24.3988	24.5136	24.1535	23.8243	24.0143	24.048		3.05132	0.442785
0.00088895	2.24053	NUDT11	sp|Q8LET2|NUD11_ARATH Nudix hydrolase 11 OS=Arabidopsis thaliana OX=3702 GN=NUDT11 PE=1 SV=2	25.1543	25.0069	24.9711	25.281	23.5377	24.1239	24.3289	23.7673		3.05112	1.16384
0.000894194	1.30249	LACS4	sp|Q9T0A0|LACS4_ARATH Long chain acyl-CoA synthetase 4 OS=Arabidopsis thaliana OX=3702 GN=LACS4 PE=2 SV=1	29.5015	29.5434	29.4988	29.3147	29.1289	29.1594	29.0051	29.0399		3.04857	0.381269
0.000894208	0.728673	MAP65-1	sp|Q9FLP0|MA651_ARATH 65-kDa microtubule-associated protein 1 OS=Arabidopsis thaliana OX=3702 GN=MAP65-1 PE=1 SV=1	26.2256	26.4385	26.3614	26.3827	26.7727	26.7124	26.766	26.9838		3.04856	-0.456656
0.000896277	1.67825	GH3.17	sp|Q9FZ87|GH317_ARATH Indole-3-acetic acid-amido synthetase GH3.17 OS=Arabidopsis thaliana OX=3702 GN=GH3.17 PE=1 SV=1	27.775	27.7329	27.6425	27.3491	26.9996	26.8893	26.9639	26.6589		3.04756	0.746955
0.000981646	0.617515	At1g09300	sp|F4HZG9|ICP55_ARATH Intermediate cleaving peptidase 55, mitochondrial OS=Arabidopsis thaliana OX=3702 GN=ICP55 PE=1 SV=1	26.3098	26.1695	26.1013	25.9918	26.9673	27.0166	26.7682	26.602		3.00805	-0.695453
0.00100276	1.39562	NSP4	sp|O04316|JAL29_ARATH Nitrile-specifier protein 4 OS=Arabidopsis thaliana OX=3702 GN=NSP4 PE=2 SV=1	32.0051	31.9253	31.8181	31.7882	31.564	31.2574	31.4196	31.3721		2.9988	0.480909
0.00101264	1.30475	OASA1	sp|P47998|CYSK1_ARATH Cysteine synthase 1 OS=Arabidopsis thaliana OX=3702 GN=OASA1 PE=1 SV=2	31.4285	31.467	31.4208	31.2658	31.1159	31.0373	31.0037	30.8901		2.99455	0.383779
0.00101741	0.568742	PHT1-2;PHT1-1	sp|Q8VYM2|PHT11_ARATH Inorganic phosphate transporter 1-1 OS=Arabidopsis thaliana OX=3702 GN=PHT1-1 PE=1 SV=2;sp|Q96243|PHT12_ARATH Probable inorganic phosphate transporter 1-2 OS=Arabidopsis thaliana OX=3702 GN=PHT1-2 PE=2 SV=2	27.2662	26.9469	27.2859	26.8443	27.9469	28.1012	27.8066	27.7452		2.9925	-0.814154
0.00103688	0.64202	SCE1	sp|Q42551|SCE1_ARATH SUMO-conjugating enzyme SCE1 OS=Arabidopsis thaliana OX=3702 GN=SCE1 PE=1 SV=1	26.7001	26.4534	26.4225	26.4671	27.0038	27.1302	27.0665	27.3999		2.98427	-0.639309
0.00103739	1.32938	AAPT1	sp|O82567|AAPT1_ARATH Choline/ethanolaminephosphotransferase 1 OS=Arabidopsis thaliana OX=3702 GN=AAPT1 PE=1 SV=1	26.5159	26.6927	26.5558	26.5923	26.2934	26.0234	26.1629	26.2341		2.98406	0.410749
0.00103816	1.23203	F7O18.7	sp|Q9SR15|SYWC_ARATH Tryptophan--tRNA ligase, cytoplasmic OS=Arabidopsis thaliana OX=3702 GN=At3g04600 PE=2 SV=1	28.1537	28.1735	28.1604	28.0195	27.8558	27.8116	27.7332	27.9023		2.98374	0.30104
0.00105361	0.800009	CPK9	sp|Q38868|CDPK9_ARATH Calcium-dependent protein kinase 9 OS=Arabidopsis thaliana OX=3702 GN=CPK9 PE=1 SV=1	26.8075	26.6334	26.7163	26.6034	27.0543	27.0462	26.9256	27.0221		2.97732	-0.321913
0.00113956	0.700426	PTI12	sp|O49339|PTI12_ARATH PTI1-like tyrosine-protein kinase 2 OS=Arabidopsis thaliana OX=3702 GN=PTI12 PE=1 SV=1	25.9381	25.836	26.1018	26.0868	26.5862	26.6139	26.4739	26.3435		2.94326	-0.513695
0.0011948	1.34756	DER1	sp|Q8VZU9|DERL1_ARATH Derlin-1 OS=Arabidopsis thaliana OX=3702 GN=DER1 PE=2 SV=1	26.389	26.4457	26.4227	26.2021	26.0158	25.8652	25.8322	26.025		2.9227	0.43035
0.0012008	0.787369	AK1	sp|Q9LYU8|AK1_ARATH Aspartokinase 1, chloroplastic OS=Arabidopsis thaliana OX=3702 GN=AK1 PE=1 SV=1	26.2852	26.3403	26.1882	26.2326	26.5467	26.6553	26.5021	26.7218		2.92053	-0.344888
0.00120787	0.710329	RPL36B;RPL36A	sp|O80929|RL361_ARATH 60S ribosomal protein L36-1 OS=Arabidopsis thaliana OX=3702 GN=RPL36A PE=3 SV=1;sp|Q9M352|RL362_ARATH 60S ribosomal protein L36-2 OS=Arabidopsis thaliana OX=3702 GN=RPL36B PE=3 SV=1	29.4731	29.2219	29.4853	29.4705	29.8905	29.9716	30.0117	29.7507		2.91798	-0.493441
0.00123482	1.26919	RABB1B	sp|Q38922|RAB1B_ARATH Ras-related protein RABB1b OS=Arabidopsis thaliana OX=3702 GN=RABB1B PE=2 SV=1	26.7599	26.8081	26.7784	26.66	26.458	26.5145	26.2806	26.3778		2.9084	0.343911
0.00124738	0.594066	MVP1	sp|Q7XA74|GDL21_ARATH Inactive GDSL esterase/lipase-like protein 25 OS=Arabidopsis thaliana OX=3702 GN=MVP1 PE=1 SV=1	25.5747	25.7884	25.5681	25.7965	26.1984	26.3936	26.3911	26.7498		2.904	-0.751305
0.00128937	1.5926	ELC	sp|Q9LHG8|ELC_ARATH Protein ELC OS=Arabidopsis thaliana OX=3702 GN=ELC PE=1 SV=1	26.4377	26.3712	26.2189	26.061	25.5238	25.7153	25.4038	25.7604		2.88962	0.671381
0.00129076	1.35518	UGT71C3	sp|Q9LML7|U71C3_ARATH UDP-glycosyltransferase 71C3 OS=Arabidopsis thaliana OX=3702 GN=UGT71C3 PE=2 SV=1	25.5725	25.4835	25.6197	25.3674	24.9911	25.063	25.0083	25.2269		2.88916	0.438487
0.00134444	1.2661		sp|Q9FWA3|6PGD2_ARATH 6-phosphogluconate dehydrogenase, decarboxylating 2 OS=Arabidopsis thaliana OX=3702 GN=PGD2 PE=1 SV=1	30.5007	30.6099	30.5573	30.3977	30.2519	30.2254	30.0741	30.1527		2.87146	0.34039
0.00135479	0.76711		sp|Q9FXJ2|GDL7_ARATH GDSL esterase/lipase At1g28580 OS=Arabidopsis thaliana OX=3702 GN=At1g28580 PE=2 SV=1	25.1746	25.0527	25.2827	25.0191	25.523	25.5819	25.5251	25.4291		2.86813	-0.382494
0.0013724	1.56046	HGO	sp|Q9ZRA2|HGD_ARATH Homogentisate 1,2-dioxygenase OS=Arabidopsis thaliana OX=3702 GN=HGO PE=2 SV=2	26.5779	26.8514	26.8119	26.5245	26.1003	26.2517	25.9449	25.9009		2.86252	0.641976
0.00139859	0.560092	T4I9.18	sp|Q9ZT92|AK10B_ARATH RNA demethylase ALKBH10B OS=Arabidopsis thaliana OX=3702 GN=ALKBH10B PE=1 SV=1	25.1472	25.3342	25.205	25.2456	25.6902	26.355	26.0141	26.2176		2.85431	-0.836264
0.00142755	0.807051		sp|Q9LUG5|RPF2_ARATH Ribosome production factor 2 homolog OS=Arabidopsis thaliana OX=3702 GN=At3g23620 PE=2 SV=1	26.1305	26.1293	26.1246	25.9803	26.3266	26.4473	26.3344	26.4934		2.84541	-0.309268
0.00143111	1.31944	MCCA	sp|Q42523|MCCA_ARATH Methylcrotonoyl-CoA carboxylase subunit alpha, mitochondrial OS=Arabidopsis thaliana OX=3702 GN=MCCA PE=1 SV=2	26.1656	26.2777	26.082	26.1944	25.8668	25.8793	25.6246	25.7493		2.84433	0.399922
0.0014585	0.736811	PCMP-H66	sp|Q9ZQE5|PP153_ARATH Pentatricopeptide repeat-containing protein At2g15690, mitochondrial OS=Arabidopsis thaliana OX=3702 GN=PCMP-H66 PE=1 SV=2	24.7459	24.9261	24.9468	24.8397	25.2778	25.3576	25.1397	25.4458		2.83609	-0.440633
0.00149071	1.32166	CDA1	sp|O65896|CDA1_ARATH Cytidine deaminase 1 OS=Arabidopsis thaliana OX=3702 GN=CDA1 PE=1 SV=1	29.1638	29.1514	29.1272	29.0804	28.8107	28.8171	28.5194	28.7662		2.82661	0.402347
0.00150617	1.33921	P4H1	sp|Q9ZW86|P4H1_ARATH Prolyl 4-hydroxylase 1 OS=Arabidopsis thaliana OX=3702 GN=P4H1 PE=1 SV=1	26.6561	26.5637	26.4748	26.6339	26.0469	26.3463	26.1128	26.1369		2.82213	0.421378
0.00153715	1.85697		sp|Q8VZC7|DRL36_ARATH Probable disease resistance protein At5g45510 OS=Arabidopsis thaliana OX=3702 GN=At5g45510 PE=1 SV=2	26.913	27.0136	27.0893	26.5961	26.1389	26.1774	26.0721	25.6517		2.81328	0.892952
0.00156168	1.36686	MIP3	sp|F4IP69|MIP3_ARATH Sec1 family domain-containing protein MIP3 OS=Arabidopsis thaliana OX=3702 GN=MIP3 PE=1 SV=1	25.532	25.2402	25.3177	25.3193	24.849	24.9717	24.7773	25.0078		2.80641	0.450863
0.00156558	1.27053	PDAT1	sp|Q9FNA9|PDAT1_ARATH Phospholipid:diacylglycerol acyltransferase 1 OS=Arabidopsis thaliana OX=3702 GN=PDAT1 PE=2 SV=1	26.2397	26.2133	26.2633	26.1328	25.9237	25.904	25.6989	25.9407		2.80533	0.345434
0.0015787	1.29328	PEX11E	sp|Q84JW1|PX11E_ARATH Peroxisomal membrane protein 11E OS=Arabidopsis thaliana OX=3702 GN=PEX11E PE=1 SV=1	28.8265	28.8664	28.7451	28.7031	28.4223	28.5689	28.3044	28.3613		2.8017	0.371036
0.00158517	2.67181	DSEL	sp|O49523|DSEL_ARATH Phospholipase A1-IIgamma OS=Arabidopsis thaliana OX=3702 GN=DSEL PE=1 SV=1	25.8485	25.675	25.1694	26.1123	24.385	24.4669	23.7854	24.4966		2.79993	1.41782
0.00165074	1.33272	DSK2B	sp|Q9SII8|DSK2B_ARATH Ubiquitin domain-containing protein DSK2b OS=Arabidopsis thaliana OX=3702 GN=DSK2B PE=1 SV=1	28.7864	28.7999	28.7421	28.6368	28.4737	28.3631	28.1505	28.3204		2.78232	0.414378
0.00170441	1.42831		sp|Q9LX73|UFL1_ARATH E3 UFM1-protein ligase 1 homolog OS=Arabidopsis thaliana OX=3702 GN=At3g46220 PE=1 SV=1	26.2109	26.2039	26.2871	26.3281	25.8108	25.832	25.4723	25.8578		2.76843	0.514308
0.00173225	1.47279	ILL4	sp|O04373|ILL4_ARATH IAA-amino acid hydrolase ILR1-like 4 OS=Arabidopsis thaliana OX=3702 GN=ILL4 PE=1 SV=2	28.0207	28.0771	28.1494	27.8492	27.5896	27.5197	27.5299	27.223		2.76139	0.558556
0.00180861	1.55247	PYD2	sp|Q9FMP3|DPYS_ARATH Dihydropyrimidinase OS=Arabidopsis thaliana OX=3702 GN=PYD2 PE=1 SV=1	28.0552	28.0362	28.1877	27.7637	27.4565	27.4084	27.4965	27.1432		2.74265	0.634569
0.00181093	1.31157	GSTT1	sp|Q9ZRT5|GSTT1_ARATH Glutathione S-transferase T1 OS=Arabidopsis thaliana OX=3702 GN=GSTT1 PE=2 SV=1	27.9781	28.072	28.1001	27.8473	27.6953	27.6734	27.5683	27.4954		2.7421	0.391292
0.00182199	1.26595	GSTU13	sp|Q9FUS6|GSTUD_ARATH Glutathione S-transferase U13 OS=Arabidopsis thaliana OX=3702 GN=GSTU13 PE=2 SV=1	28.6554	28.7453	28.6583	28.701	28.3304	28.3251	28.2269	28.5168		2.73945	0.340217
0.00184574	1.63101		sp|P52577|IFRH_ARATH Isoflavone reductase homolog P3 OS=Arabidopsis thaliana OX=3702 GN=At1g75280 PE=2 SV=1	29.6657	29.6472	29.6649	29.6994	28.9669	28.588	29.1796	29.1196		2.73383	0.70577
0.00185858	2.17173	MLP328	sp|Q9ZVF3|ML328_ARATH MLP-like protein 328 OS=Arabidopsis thaliana OX=3702 GN=MLP328 PE=2 SV=1	33.432	33.2555	32.9539	33.0113	32.5389	31.6987	31.8824	32.0575		2.73082	1.11885
0.00192205	0.777957	CLPP6	sp|Q9SAA2|CLPP6_ARATH ATP-dependent Clp protease proteolytic subunit 6, chloroplastic OS=Arabidopsis thaliana OX=3702 GN=CLPP6 PE=1 SV=1	26.2151	25.9771	26.2018	26.1264	26.4035	26.4765	26.607	26.4824		2.71624	-0.362237
0.00205776	0.703257	CBSDUF1	sp|Q67XQ0|Y4424_ARATH DUF21 domain-containing protein At4g14240 OS=Arabidopsis thaliana OX=3702 GN=CBSDUF1 PE=1 SV=1	24.0389	24.0033	23.9893	24.2674	24.8018	24.5268	24.4925	24.5092		2.68661	-0.507875
0.00213519	1.51748	TRX5	sp|Q39241|TRXH5_ARATH Thioredoxin H5 OS=Arabidopsis thaliana OX=3702 GN=TRX5 PE=1 SV=1	29.6877	29.7589	29.7679	29.8303	29.0313	29.4992	29.0527	29.0549		2.67056	0.601682
0.00213717	1.24387	AAE1	sp|F4HUK6|AAE1_ARATH Probable acyl-activating enzyme 1, peroxisomal OS=Arabidopsis thaliana OX=3702 GN=AAE1 PE=2 SV=1	26.2362	26.3151	26.3935	26.1476	25.9493	25.9415	25.8971	26.0452		2.67016	0.314835
0.0021523	0.18707	RPS29A	sp|Q680P8|RS29_ARATH 40S ribosomal protein S29 OS=Arabidopsis thaliana OX=3702 GN=RPS29A PE=3 SV=2	26.6197	26.654	27.23	25.5709	28.9909	29.5916	29.1068	28.0588		2.6671	-2.41835
0.00229974	1.31524	B3GALT12	sp|Q66GS2|B3GTC_ARATH Probable beta-1,3-galactosyltransferase 12 OS=Arabidopsis thaliana OX=3702 GN=B3GALT12 PE=2 SV=1	25.0005	24.983	24.7213	24.9295	24.3987	24.614	24.5307	24.5096		2.63832	0.395331
0.00230457	1.31503	RABD2B	sp|Q9FPJ4|RAD2B_ARATH Ras-related protein RABD2b OS=Arabidopsis thaliana OX=3702 GN=RABD2B PE=1 SV=1	30.3415	30.5108	30.2963	30.2822	29.8382	30.045	29.892	30.0751		2.63741	0.395092
0.00231379	0.681773	CML35	sp|P30188|CML35_ARATH Probable calcium-binding protein CML35 OS=Arabidopsis thaliana OX=3702 GN=CML35 PE=2 SV=2	24.19	24.1649	24.4565	24.2429	24.9142	24.8927	24.9018	24.5561		2.63568	-0.552637
0.00232686	0.790953	PMD2	sp|Q9SHJ6|PMD2_ARATH Peroxisomal and mitochondrial division factor 2 OS=Arabidopsis thaliana OX=3702 GN=PMD2 PE=1 SV=1	27.9296	27.8198	28.0225	27.9068	28.3835	28.2479	28.2727	28.1279		2.63323	-0.338336
0.00234392	1.27457	OPR3	sp|Q9FUP0|OPR3_ARATH 12-oxophytodienoate reductase 3 OS=Arabidopsis thaliana OX=3702 GN=OPR3 PE=1 SV=2	26.9411	26.9999	26.77	26.8559	26.644	26.5868	26.4225	26.5136		2.63006	0.350008
0.00244595	1.52274		sp|Q9FIK7|THIC2_ARATH Probable acetyl-CoA acetyltransferase, cytosolic 2 OS=Arabidopsis thaliana OX=3702 GN=At5g47720 PE=2 SV=1	26.8968	27.0695	26.6614	26.9946	26.1103	26.4982	26.2359	26.3511		2.61155	0.606674
0.00244882	0.759458	HISN1A	sp|Q9S762|HIS1A_ARATH ATP phosphoribosyltransferase 1, chloroplastic OS=Arabidopsis thaliana OX=3702 GN=HISN1A PE=1 SV=1	26.8558	27.0045	27.0865	27.0481	27.2242	27.4189	27.5147	27.4249		2.61104	-0.396959
0.00244953	0.731	T2O9.190	sp|Q9M1C2|CH101_ARATH 10 kDa chaperonin 1, chloroplastic OS=Arabidopsis thaliana OX=3702 GN=CPN10-1 PE=2 SV=1	25.9999	25.7652	25.6894	25.9296	26.3676	26.3963	26.1519	26.2765		2.61092	-0.452057
0.00244994	1.57293	UGT79B2	sp|Q9T080|U79B2_ARATH UDP-glycosyltransferase 79B2 OS=Arabidopsis thaliana OX=3702 GN=UGT79B2 PE=2 SV=1	26.4786	26.7104	26.4158	26.3633	25.7042	25.6314	26.0968	25.922		2.61084	0.653454
0.00248691	0.536375	RBG5	sp|Q9C909|RBG5_ARATH Glycine-rich RNA-binding protein 5, mitochondrial OS=Arabidopsis thaliana OX=3702 GN=RBG5 PE=1 SV=1	26.4961	26.5203	26.7797	26.6048	27.6436	27.6891	27.6685	26.9944		2.60434	-0.898686
0.00252333	0.446316		sp|Q9ZUX4|UMP2_ARATH Uncharacterized protein At2g27730, mitochondrial OS=Arabidopsis thaliana OX=3702 GN=At2g27730 PE=1 SV=1	28.8943	28.6903	29.2251	28.8577	30.2564	30.376	30.2184	29.4721		2.59803	-1.16386
0.00253494	0.515328	RPL26B	sp|Q9FJX2|RL262_ARATH 60S ribosomal protein L26-2 OS=Arabidopsis thaliana OX=3702 GN=RPL26B PE=2 SV=1	25.9278	25.9641	26.1737	26.0808	27.3141	26.9796	27.1975	26.4811		2.59603	-0.956436
0.00255415	0.795628	AKHSDH1	sp|Q9SA18|AKH1_ARATH Bifunctional aspartokinase/homoserine dehydrogenase 1, chloroplastic OS=Arabidopsis thaliana OX=3702 GN=AKHSDH1 PE=1 SV=1	26.8071	26.8891	26.9945	26.8016	27.2299	27.185	27.3157	27.0811		2.59275	-0.329834
0.00256781	1.3291	LACS6	sp|Q8LPS1|LACS6_ARATH Long chain acyl-CoA synthetase 6, peroxisomal OS=Arabidopsis thaliana OX=3702 GN=LACS6 PE=1 SV=1	28.4829	28.5954	28.5134	28.2561	28.0331	28.1678	27.9874	28.0178		2.59044	0.410447
0.00256789	1.4785	LACS2	sp|Q9XIA9|LACS2_ARATH Long chain acyl-CoA synthetase 2 OS=Arabidopsis thaliana OX=3702 GN=LACS2 PE=2 SV=1	25.0503	25.2108	24.9787	24.7929	24.3166	24.4738	24.6407	24.3451		2.59042	0.564136
0.00260327	0.625842	NRPB5A	sp|O81098|RPB5A_ARATH DNA-directed RNA polymerases II and IV subunit 5A OS=Arabidopsis thaliana OX=3702 GN=NRPB5A PE=1 SV=1	25.5803	25.3071	25.2869	25.5385	26.3364	26.2604	25.8848	25.9358		2.58448	-0.676129
0.00263444	1.4096	LACS8	sp|Q9SJD4|LACS8_ARATH Long chain acyl-CoA synthetase 8 OS=Arabidopsis thaliana OX=3702 GN=LACS8 PE=1 SV=1	26.9415	26.9693	26.8278	26.5941	26.4748	26.3608	26.2289	26.287		2.57931	0.495284
0.00267563	1.27677	PIP	sp|P93732|PIP_ARATH Proline iminopeptidase OS=Arabidopsis thaliana OX=3702 GN=PIP PE=2 SV=3	25.4402	25.5611	25.5369	25.3913	25.2419	25.1251	25.1863	24.9663		2.57257	0.352502
0.00269149	1.27858	RHD3	sp|P93042|RHD3_ARATH Protein ROOT HAIR DEFECTIVE 3 OS=Arabidopsis thaliana OX=3702 GN=RHD3 PE=1 SV=1	28.8521	28.7457	28.7609	28.6865	28.356	28.4998	28.2507	28.5205		2.57001	0.354548
0.0026926	1.95664	At5g44920	sp|Q0WSX8|TIK_ARATH TIR domain-containing protein OS=Arabidopsis thaliana OX=3702 GN=TIK PE=1 SV=1	24.7114	25.1199	25.229	24.8856	24.3316	23.7321	24.2537	23.7548		2.56983	0.968377
0.00269517	1.25132	UBP6	sp|Q949Y0|UBP6_ARATH Ubiquitin carboxyl-terminal hydrolase 6 OS=Arabidopsis thaliana OX=3702 GN=UBP6 PE=1 SV=1	27.9121	27.9774	27.9622	27.8349	27.6637	27.6462	27.4257	27.6571		2.56941	0.323453
0.00275923	1.33934	CRT3	sp|O04153|CALR3_ARATH Calreticulin-3 OS=Arabidopsis thaliana OX=3702 GN=CRT3 PE=1 SV=2	26.501	26.7233	26.4223	26.5799	26.2072	26.2481	25.9931	26.092		2.55921	0.42152
0.00282498	0.621319	GASA1	sp|P46689|GASA1_ARATH Gibberellin-regulated protein 1 OS=Arabidopsis thaliana OX=3702 GN=GASA1 PE=2 SV=2	27.0945	26.9113	26.8588	27.0367	27.5096	27.4302	28.0172	27.6906		2.54898	-0.686594
0.00308708	1.26343	CHI1	sp|P41088|CFI1_ARATH Chalcone--flavonone isomerase 1 OS=Arabidopsis thaliana OX=3702 GN=CHI1 PE=1 SV=2;sp|Q9LKC3|CFI_ARALP Chalcone--flavonone isomerase OS=Arabidopsis lyrata subsp. petraea OX=59691 GN=CHI PE=3 SV=1	27.9115	28.0241	27.7764	27.8967	27.4664	27.7002	27.5613	27.5315		2.51045	0.337344
0.00311216	1.70247	DPL1	sp|Q9C509|SGPL_ARATH Sphingosine-1-phosphate lyase OS=Arabidopsis thaliana OX=3702 GN=DPL1 PE=1 SV=1	27.0502	26.8558	27.1249	26.4379	26.1135	25.9636	26.1384	26.1827		2.50694	0.767629
0.00311313	1.41703		sp|Q9C723|NADE_ARATH Glutamine-dependent NAD(+) synthetase OS=Arabidopsis thaliana OX=3702 GN=At1g55090 PE=2 SV=1	26.167	26.5323	26.1968	26.1671	25.9058	25.7899	25.7159	25.6403		2.5068	0.502875
0.00315489	1.26264	FPGS1	sp|F4K2A1|FPGS1_ARATH Folylpolyglutamate synthase OS=Arabidopsis thaliana OX=3702 GN=FPGS1 PE=1 SV=1	27.4369	27.3743	27.4928	27.3066	27.1588	26.9854	26.947	27.1737		2.50102	0.336438
0.00319637	0.783809	ADNT1	sp|O04619|ADNT1_ARATH Mitochondrial adenine nucleotide transporter ADNT1 OS=Arabidopsis thaliana OX=3702 GN=ADNT1 PE=1 SV=1	27.4084	27.4086	27.2027	27.2515	27.7957	27.6535	27.5448	27.6828		2.49534	-0.351427
0.00320923	2.29836	HINT4	sp|Q84VV6|HINT4_ARATH Bifunctional adenosine 5-phosphosulfate phosphorylase/adenylylsulfatase HINT4 OS=Arabidopsis thaliana OX=3702 GN=HINT4 PE=1 SV=1	25.1512	24.8294	24.9313	24.6761	23.6112	23.3757	23.4197	24.3789		2.4936	1.2006
0.00321943	1.40694	NADP-ME2	sp|Q9LYG3|MAOP2_ARATH NADP-dependent malic enzyme 2 OS=Arabidopsis thaliana OX=3702 GN=NADP-ME2 PE=1 SV=1	31.2066	31.4644	31.4859	31.151	30.9212	30.9131	30.8322	30.671		2.49222	0.492561
0.00327955	1.45304	PYD3	sp|Q8H183|BUP1_ARATH Beta-ureidopropionase OS=Arabidopsis thaliana OX=3702 GN=PYD3 PE=1 SV=1	27.8818	28.0799	28.1751	27.7378	27.4378	27.3978	27.5824	27.3004		2.48419	0.539076
0.0033977	1.29615	SPS1	sp|Q94BT0|SPSA1_ARATH Sucrose-phosphate synthase 1 OS=Arabidopsis thaliana OX=3702 GN=SPS1 PE=1 SV=1	28.6569	28.7069	28.6628	28.7171	28.2887	28.1096	28.3641	28.4844		2.46881	0.374234
0.00341591	1.40173	ILL1	sp|P54969|ILL1_ARATH IAA-amino acid hydrolase ILR1-like 1 OS=Arabidopsis thaliana OX=3702 GN=ILL1 PE=1 SV=1	25.7519	25.6958	25.7576	25.8857	25.3858	25.4755	25.0337	25.2471		2.46649	0.487208
0.00348016	1.79969	GULLO2	sp|Q6NQ66|GGLO2_ARATH L-gulonolactone oxidase 2 OS=Arabidopsis thaliana OX=3702 GN=GULLO2 PE=1 SV=1	27.4507	27.7526	27.6972	27.2345	27.0017	26.8078	26.5578	26.3766		2.4584	0.847751
0.00350122	0.729418	H2B	sp|Q9FFC0|H2B10_ARATH Histone H2B.10 OS=Arabidopsis thaliana OX=3702 GN=At5g22880 PE=1 SV=3;sp|Q9LQQ4|H2B1_ARATH Histone H2B.1 OS=Arabidopsis thaliana OX=3702 GN=At1g;sp|Q9LZT0|H2B7_ARATH Histone H2B.7 OS=Arabidopsis thaliana OX=3702 GN=At3g46030 PE=1 SV=3	31.2225	31.4109	31.2562	31.523	31.7124	31.9882	31.8413	31.6915		2.45578	-0.455183
0.00357761	0.789318	PME3	sp|O49006|PME3_ARATH Pectinesterase/pectinesterase inhibitor 3 OS=Arabidopsis thaliana OX=3702 GN=PME3 PE=1 SV=2	29.2826	29.1872	29.2334	29.1844	29.7042	29.5002	29.6505	29.3979		2.44641	-0.341321
0.0036263	0.755302	ABCC2	sp|Q42093|AB2C_ARATH ABC transporter C family member 2 OS=Arabidopsis thaliana OX=3702 GN=ABCC2 PE=1 SV=2	26.1457	26.3131	26.3407	26.1062	26.4541	26.6717	26.6351	26.7643		2.44054	-0.404875
0.00364059	0.683537	At2g40360	sp|F4IH25|BOP1_ARATH Ribosome biogenesis protein BOP1 homolog OS=Arabidopsis thaliana OX=3702 GN=BOP1 PE=1 SV=1	24.8011	24.5132	25.0115	24.5524	25.2706	25.2689	25.206	25.3284		2.43883	-0.548908
0.00374328	1.54144	ANNAT7	sp|Q9LX07|ANXD7_ARATH Annexin D7 OS=Arabidopsis thaliana OX=3702 GN=ANNAT7 PE=2 SV=1	27.0387	26.9382	26.869	26.7575	26.4818	26.1099	26.0231	26.4915		2.42675	0.624275
0.00381081	1.38357	RABA1A	sp|P28185|RAA1A_ARATH Ras-related protein RABA1a OS=Arabidopsis thaliana OX=3702 GN=RABA1A PE=1 SV=1	27.8575	28.0115	28.0174	27.7083	27.4792	27.5315	27.4921	27.2185		2.41898	0.468391
0.00383597	1.48513	ACX1.2	sp|Q9ZQP2|ACO12_ARATH Putative peroxisomal acyl-coenzyme A oxidase 1.2 OS=Arabidopsis thaliana OX=3702 GN=ACX1.2 PE=2 SV=1	26.4675	26.5908	26.2918	26.2897	25.729	26.0986	25.6371	25.8927		2.41612	0.570591
0.00385305	0.761836	VPS11	sp|Q9SJ40|VPS11_ARATH Vacuolar protein-sorting-associated protein 11 homolog OS=Arabidopsis thaliana OX=3702 GN=VPS11 PE=1 SV=1	25.1423	25.4036	25.1507	25.3282	25.5117	25.7542	25.603	25.7255		2.41419	-0.392448
0.00387727	0.737261	RPL10A	sp|Q93VT9|RL101_ARATH 60S ribosomal protein L10-1 OS=Arabidopsis thaliana OX=3702 GN=RPL10A PE=1 SV=1	30.2635	30.0048	30.1247	29.8477	30.561	30.571	30.4522	30.4155		2.41147	-0.439753
0.00388561	0.77828	SPS3	sp|Q5HZ00|SPS3_ARATH Solanesyl diphosphate synthase 3, chloroplastic/mitochondrial OS=Arabidopsis thaliana OX=3702 GN=SPS3 PE=1 SV=1	26.1036	26.0614	26.2642	26.1762	26.3972	26.616	26.4011	26.6375		2.41054	-0.361639
0.00392174	1.33732	ERD15	sp|Q39096|ERD15_ARATH Protein EARLY RESPONSIVE TO DEHYDRATION 15 OS=Arabidopsis thaliana OX=3702 GN=ERD15 PE=1 SV=1	25.7789	26.1062	26.1237	25.8336	25.5469	25.5672	25.4801	25.5709		2.40652	0.419346
0.0039493	0.721102	PRXIIE	sp|Q949U7|PRX2E_ARATH Peroxiredoxin-2E, chloroplastic OS=Arabidopsis thaliana OX=3702 GN=PRXIIE PE=1 SV=2	29.1343	28.9208	28.8839	29.0305	29.2563	29.5463	29.6563	29.3974		2.40348	-0.471724
0.00397843	0.615693	RH28	sp|Q9ZRZ8|RH28_ARATH DEAD-box ATP-dependent RNA helicase 28 OS=Arabidopsis thaliana OX=3702 GN=RH28 PE=2 SV=1	24.1031	23.9083	24.1735	23.988	25.167	24.5745	24.5722	24.658		2.40029	-0.699717
0.00401351	1.28992		sp|F4IBB2|PGML2_ARATH Phosphoglycerate mutase-like protein 2 OS=Arabidopsis thaliana OX=3702 GN=At1g58280 PE=2 SV=1	27.5183	27.5529	27.3567	27.2822	27.1819	26.9574	27.0931	27.0087		2.39648	0.36728
0.0040687	1.54552	CSY3	sp|Q9SJH7|CISY3_ARATH Citrate synthase 3, peroxisomal OS=Arabidopsis thaliana OX=3702 GN=CSY3 PE=2 SV=1	28.1917	28.4737	28.4172	27.9651	27.76	27.7615	27.5641	27.4498		2.39054	0.628089
0.00407567	2.98379	At1g33970	sp|F4HT21|IAN9_ARATH Immune-associated nucleotide-binding protein 9 OS=Arabidopsis thaliana OX=3702 GN=IAN9 PE=2 SV=1	25.0318	25.0181	26.0796	24.9419	23.6131	23.9897	23.097	24.0629		2.3898	1.57715
0.00408608	0.681051		sp|P26569|H12_ARATH Histone H1.2 OS=Arabidopsis thaliana OX=3702 GN=At2g30620 PE=1 SV=1	26.6176	26.3496	26.392	26.6753	27.3012	27.094	26.9947	26.8612		2.38869	-0.554165
0.00420151	1.30101	PXM16	sp|O22941|IDE1_ARATH Insulin-degrading enzyme-like 1, peroxisomal OS=Arabidopsis thaliana OX=3702 GN=PXM16 PE=2 SV=1	27.4199	27.4439	27.5302	27.1636	27.0941	26.9623	27.0185	26.9641		2.37659	0.379631
0.00423731	1.39794	AAE5;AAE6	sp|Q9FFE6|AAE5_ARATH Probable acyl-activating enzyme 5, peroxisomal OS=Arabidopsis thaliana OX=3702 GN=AAE5 PE=1 SV=1;sp|Q9FFE9|AAE6_ARATH Probable acyl-activating enzyme 6 OS=Arabidopsis thaliana OX=3702 GN=AAE6 PE=2 SV=1	25.7739	25.7546	25.7209	25.4319	25.3566	25.2583	25.0754	25.0578		2.37291	0.483304
0.00431018	0.361095	PER61	sp|Q9FLV5|PER61_ARATH Probable peroxidase 61 OS=Arabidopsis thaliana OX=3702 GN=PER61 PE=3 SV=1	23.9185	23.7178	24.2716	23.6526	25.0782	26.2569	25.0442	25.0596		2.36551	-1.46955
0.00440837	1.35573	UXS5	sp|Q9SN95|UXS5_ARATH UDP-glucuronic acid decarboxylase 5 OS=Arabidopsis thaliana OX=3702 GN=UXS5 PE=2 SV=1	27.9964	28.0116	28.1114	27.9884	27.4159	27.6592	27.4536	27.8229		2.35572	0.439074
0.00447116	0.70317	SYP22	sp|P93654|SYP22_ARATH Syntaxin-22 OS=Arabidopsis thaliana OX=3702 GN=SYP22 PE=1 SV=1	26.0167	25.925	25.8135	25.8228	26.5782	26.4914	26.4397	26.1011		2.34958	-0.508054
0.00448457	1.47051	MLP34	sp|Q9SSK7|MLP34_ARATH MLP-like protein 34 OS=Arabidopsis thaliana OX=3702 GN=MLP34 PE=2 SV=1	31.2529	31.3172	31.2173	30.8202	30.7533	30.602	30.5058	30.5213		2.34828	0.556313
0.00450278	3.05956		sp|Q9SR86|AGT23_ARATH Alanine--glyoxylate aminotransferase 2 homolog 3, mitochondrial OS=Arabidopsis thaliana OX=3702 GN=At3g08860 PE=2 SV=1	26.1826	26.3568	25.8976	27.2486	24.4969	24.3943	25.008	25.3332		2.34652	1.61332
0.00450745	0.768911	ABCB4	sp|O80725|AB4B_ARATH ABC transporter B family member 4 OS=Arabidopsis thaliana OX=3702 GN=ABCB4 PE=1 SV=1	26.9742	27.2478	27.0257	26.9131	27.3709	27.5541	27.3602	27.392		2.34607	-0.379111
0.00452443	0.679229	MAM3	sp|Q9FN52|MAM3_ARATH Methylthioalkylmalate synthase 3, chloroplastic OS=Arabidopsis thaliana OX=3702 GN=MAM3 PE=1 SV=1	27.4525	27.1657	27.2537	27.2071	27.8251	27.7857	27.5846	28.1157		2.34444	-0.558029
0.00456056	1.60804	ECA2	sp|O23087|ECA2_ARATH Calcium-transporting ATPase 2, endoplasmic reticulum-type OS=Arabidopsis thaliana OX=3702 GN=ECA2 PE=1 SV=1	26.2719	26.1674	26.2849	25.7876	25.5224	25.486	25.1441	25.6181		2.34098	0.685301
0.00456111	0.546199	RPS15D	sp|Q9FY64|RS154_ARATH 40S ribosomal protein S15-4 OS=Arabidopsis thaliana OX=3702 GN=RPS15D PE=2 SV=1	26.0952	25.8939	26.2649	26.2282	26.8565	27.1407	27.4038	26.5712		2.34093	-0.872501
0.0046948	0.755037	NRPA2	sp|F4I366|NRPA2_ARATH DNA-directed RNA polymerase I subunit 2 OS=Arabidopsis thaliana OX=3702 GN=NRPA2 PE=2 SV=1	26.1948	26.0661	26.3367	26.0595	26.7566	26.5657	26.4836	26.4729		2.32838	-0.405382
0.0047465	1.27699	F2K13_30	sp|Q9LFL3|TOL1_ARATH TOM1-like protein 1 OS=Arabidopsis thaliana OX=3702 GN=TOL1 PE=1 SV=1	27.2763	27.2749	27.4313	27.0887	26.9976	26.9681	26.8655	26.8291		2.32363	0.352748
0.00475642	0.173194	LTP1	sp|Q42589|NLTP1_ARATH Non-specific lipid-transfer protein 1 OS=Arabidopsis thaliana OX=3702 GN=LTP1 PE=2 SV=1	27.7424	27.2043	26.9967	26.0482	28.9737	29.5012	30.8323	28.8026		2.32272	-2.52954
0.00488966	2.3832	At5g63560	sp|Q9FFQ7|FACT_ARATH Fatty alcohol:caffeoyl-CoA acyltransferase OS=Arabidopsis thaliana OX=3702 GN=FACT PE=2 SV=1	29.0615	29.1016	28.9722	28.4751	27.943	27.8668	27.8872	26.9018		2.31072	1.2529
0.00491743	1.29886	PSL4	sp|Q9FM96|PSL4_ARATH Glucosidase 2 subunit beta OS=Arabidopsis thaliana OX=3702 GN=PSL4 PE=2 SV=1	25.926	25.795	25.6955	25.8922	25.4277	25.3056	25.4249	25.6414		2.30826	0.377247
0.00497922	1.42102	CYP73A5	sp|P92994|TCMO_ARATH Trans-cinnamate 4-monooxygenase OS=Arabidopsis thaliana OX=3702 GN=CYP73A5 PE=1 SV=1	30.4549	30.577	30.3144	30.4375	29.9766	30.0202	29.6393	30.1199		2.30284	0.506928
0.00507684	1.32762	PED1	sp|Q56WD9|THIK2_ARATH 3-ketoacyl-CoA thiolase 2, peroxisomal OS=Arabidopsis thaliana OX=3702 GN=PED1 PE=1 SV=2	30.2636	30.3781	30.3237	30.0464	29.87	29.929	29.9129	29.6645		2.29441	0.408842
0.0050886	1.34894	AAPT2	sp|O82568|AAPT2_ARATH Choline/ethanolaminephosphotransferase 2 OS=Arabidopsis thaliana OX=3702 GN=AAPT2 PE=1 SV=1	27.7782	27.9978	27.7927	27.7841	27.6226	27.209	27.4195	27.3744		2.2934	0.431831
0.00516785	1.57402	CYP71B26	sp|Q9LTL0|C71BQ_ARATH Cytochrome P450 71B26 OS=Arabidopsis thaliana OX=3702 GN=CYP71B26 PE=2 SV=1	26.8909	26.9338	26.7641	26.5776	26.4703	26.2042	25.9982	25.8758		2.28669	0.65445
0.00523127	1.32152	GPAT9	sp|Q8GWG0|GPAT9_ARATH Glycerol-3-phosphate acyltransferase 9 OS=Arabidopsis thaliana OX=3702 GN=GPAT9 PE=1 SV=1	26.8693	27.199	26.8938	26.8019	26.4415	26.5729	26.582	26.5587		2.28139	0.4022
0.00526326	1.30633	CINV1	sp|Q9LQF2|CINV1_ARATH Alkaline/neutral invertase CINV1 OS=Arabidopsis thaliana OX=3702 GN=CINV1 PE=1 SV=1	29.1691	29.3503	29.2414	29.15	28.8603	29.0396	28.6617	28.8071		2.27874	0.38552
0.00529678	1.29773	DRT102	sp|Q05212|DR102_ARATH DNA damage-repair/toleration protein DRT102 OS=Arabidopsis thaliana OX=3702 GN=DRT102 PE=1 SV=2	27.5761	27.711	27.5921	27.4385	27.2695	27.3508	27.0372	27.1561		2.27599	0.37599
0.00533051	0.58847	ACA4	sp|O22218|ACA4_ARATH Calcium-transporting ATPase 4, plasma membrane-type OS=Arabidopsis thaliana OX=3702 GN=ACA4 PE=1 SV=1	24.9957	24.8963	25.1283	25.1006	25.5017	26.1363	26.0451	25.4976		2.27323	-0.76496
0.00538981	0.528291	ASB2	sp|Q9FJM5|ASB2_ARATH Anthranilate synthase beta subunit 2, chloroplastic OS=Arabidopsis thaliana OX=3702 GN=ASB2 PE=2 SV=1	24.4205	24.5392	24.7818	24.7195	25.7677	25.9076	25.4655	25.0027		2.26843	-0.920594
0.00543695	1.57671	ILL2	sp|P54970|ILL2_ARATH IAA-amino acid hydrolase ILR1-like 2 OS=Arabidopsis thaliana OX=3702 GN=ILL2 PE=1 SV=2	26.0109	26.1702	26.0529	25.7807	25.4771	25.6256	25.0206	25.2637		2.26464	0.656919
0.00545764	0.281828	CUL3B	sp|Q9C9L0|CUL3B_ARATH Cullin-3B OS=Arabidopsis thaliana OX=3702 GN=CUL3B PE=1 SV=1	24.3683	24.6254	23.5546	24.1227	26.1687	26.5241	26.3666	24.92		2.263	-1.82711
0.0054867	0.347786	At2g17500	sp|Q9SHL8|PILS5_ARATH Protein PIN-LIKES 5 OS=Arabidopsis thaliana OX=3702 GN=PILS5 PE=2 SV=1	23.642	24.6407	24.0397	23.556	24.9425	25.9709	25.1507	25.9092		2.26069	-1.52373
0.00549365	1.30988	APT3	sp|Q9SUW2|APT3_ARATH Adenine phosphoribosyltransferase 3 OS=Arabidopsis thaliana OX=3702 GN=APT3 PE=1 SV=1	29.8223	29.9499	30.0194	29.7052	29.5248	29.5193	29.3096	29.5854		2.26014	0.389431
0.00549822	0.617671	BCAT4	sp|Q9LE06|BCAT4_ARATH Methionine aminotransferase BCAT4 OS=Arabidopsis thaliana OX=3702 GN=BCAT4 PE=1 SV=1	27.0865	26.8422	26.4993	26.9418	27.6788	27.4964	27.2528	27.7221		2.25978	-0.69509
0.005709	0.70569	At5g55850	sp|O22633|NOI4_ARATH Protein NOI4 OS=Arabidopsis thaliana OX=3702 GN=NOI4 PE=1 SV=1	25.4854	25.4104	25.2684	25.3095	25.9304	26.1456	25.637	25.7724		2.24344	-0.502893
0.00572481	0.729486	EMB2754	sp|Q8L5Y0|VPS39_ARATH Vacuolar sorting protein 39 OS=Arabidopsis thaliana OX=3702 GN=VPS39 PE=1 SV=1	25.1625	25.1283	25.4245	25.2749	25.4527	25.7484	25.7706	25.8387		2.24224	-0.455048
0.00583579	0.668057	ESD4	sp|Q94F30|ESD4_ARATH Ubiquitin-like-specific protease ESD4 OS=Arabidopsis thaliana OX=3702 GN=ESD4 PE=1 SV=1	26.4653	26.3268	26.681	26.5879	27.1217	27.4139	26.9658	26.8874		2.2339	-0.581958
0.00588728	0.571819	HISN7	sp|Q6NPM8|HIS7_ARATH Bifunctional phosphatase IMPL2, chloroplastic OS=Arabidopsis thaliana OX=3702 GN=HISN7 PE=1 SV=1	25.7533	25.81	26.0224	25.3693	26.1652	26.7281	26.522	26.7652		2.23009	-0.806369
0.00591946	1.74646	At2g43590	sp|O24658|CHI59_ARATH Endochitinase At2g43590 OS=Arabidopsis thaliana OX=3702 GN=At2g43590 PE=2 SV=1	28.3814	28.5186	29.0837	28.485	27.814	28.0827	27.8147	27.5396		2.22772	0.804438
0.0059218	1.39771	ERD10	sp|P42759|ERD10_ARATH Dehydrin ERD10 OS=Arabidopsis thaliana OX=3702 GN=ERD10 PE=1 SV=1	30.0806	29.8136	29.9316	29.9387	29.7046	29.2079	29.4253	29.4942		2.22755	0.483061
0.00608302	1.4466	At3g01310	sp|F4J8C6|VIP1L_ARATH Inositol hexakisphosphate and diphosphoinositol-pentakisphosphate kinase VIP1 OS=Arabidopsis thaliana OX=3702 GN=VIP1 PE=1 SV=1	25.879	26.268	26.0164	25.67	25.4042	25.5114	25.3848	25.4023		2.21588	0.532668
0.00608637	1.36205	PSD3	sp|A4GNA8|PSD3_ARATH Phosphatidylserine decarboxylase proenzyme 3 OS=Arabidopsis thaliana OX=3702 GN=PSD3 PE=1 SV=1	26.2647	26.3092	26.1141	26.2976	26.068	25.8225	25.6783	25.6336		2.21564	0.445776
0.00612005	1.35608	AIM1	sp|Q9ZPI6|AIM1_ARATH Peroxisomal fatty acid beta-oxidation multifunctional protein AIM1 OS=Arabidopsis thaliana OX=3702 GN=AIM1 PE=1 SV=1	28.9158	29.0725	29.0329	28.7388	28.563	28.6461	28.5005	28.2926		2.21325	0.439445
0.00623393	1.99561	LOX1	sp|Q06327|LOX1_ARATH Linoleate 9S-lipoxygenase 1 OS=Arabidopsis thaliana OX=3702 GN=LOX1 PE=1 SV=1	29.3113	29.532	29.5122	28.6063	28.2443	28.4371	28.3477	27.9453		2.20524	0.996829
0.00626345	0.67186	FUC95A	sp|Q8L7W8|FUCO2_ARATH Alpha-L-fucosidase 2 OS=Arabidopsis thaliana OX=3702 GN=FUC95A PE=1 SV=1	25.9885	25.5799	25.6856	26.1361	26.4521	26.3375	26.3403	26.5553		2.20319	-0.573768
0.00634433	1.31586	F5I6.11	sp|Q9C969|ISS1_ARATH Aromatic aminotransferase ISS1 OS=Arabidopsis thaliana OX=3702 GN=ISS1 PE=1 SV=1	28.7398	28.6983	28.8172	28.4991	28.4195	28.399	28.2079	28.144		2.19761	0.396006
0.00641794	0.601152	CALS12	sp|Q9ZT82|CALSC_ARATH Callose synthase 12 OS=Arabidopsis thaliana OX=3702 GN=CALS12 PE=2 SV=1	24.5045	24.438	24.153	24.7028	25.1761	25.4616	24.8064	25.2909		2.1926	-0.734199
0.00644192	1.9897	At5g66930	sp|F4K265|AT101_ARATH Autophagy-related protein 101 OS=Arabidopsis thaliana OX=3702 GN=ATG101 PE=1 SV=1	25.5313	25.2502	25.268	24.9682	24.4043	23.723	24.1781	24.7423		2.19098	0.99255
0.00649875	1.31862	SPR1	sp|Q9SJW3|SPR1_ARATH Protein SPIRAL1 OS=Arabidopsis thaliana OX=3702 GN=SPR1 PE=2 SV=1	29.0444	28.8001	28.9177	28.8155	28.5821	28.276	28.4837	28.6397		2.18717	0.399034
0.00649942	1.31272		sp|Q9SFU0|SC24A_ARATH Protein transport protein Sec24-like At3g07100 OS=Arabidopsis thaliana OX=3702 GN=At3g07100 PE=2 SV=2	27.8244	27.8972	27.7417	27.8079	27.4825	27.4371	27.175	27.6063		2.18713	0.392559
0.00662599	0.667884		sp|Q93YV7|PMT3_ARATH Probable methyltransferase PMT3 OS=Arabidopsis thaliana OX=3702 GN=At4g14360 PE=2 SV=1	24.0469	24.5074	23.8852	23.9261	24.6871	24.6422	24.6704	24.6952		2.17875	-0.58233
0.00669661	0.762489	RANGAP2	sp|Q9M651|RAGP2_ARATH RAN GTPase-activating protein 2 OS=Arabidopsis thaliana OX=3702 GN=RANGAP2 PE=1 SV=2	26.0483	26.0073	26.0293	26.15	26.2405	26.5496	26.3635	26.6462		2.17414	-0.391212
0.00694172	1.33962	UGT71C5	sp|Q9FE68|U71C5_ARATH UDP-glycosyltransferase 71C5 OS=Arabidopsis thaliana OX=3702 GN=UGT71C5 PE=2 SV=1	27.1275	27.2302	27.4309	27.0381	26.8455	26.8227	26.8707	26.6005		2.15853	0.421821
0.00698791	0.221689	At4g27490	sp|A2RVK7|RP41L_ARATH Exosome complex component RRP41-like OS=Arabidopsis thaliana OX=3702 GN=RRP41L PE=2 SV=1	24.3537	23.0225	23.7514	22.9007	26.3527	24.4553	25.8362	26.0777		2.15565	-2.17339
0.00708686	0.490041	MO1	sp|O81815|MO1_ARATH Monooxygenase 1 OS=Arabidopsis thaliana OX=3702 GN=MO1 PE=2 SV=1	24.2701	23.3495	23.3538	23.4148	24.5899	24.7519	24.8684	24.2941		2.14955	-1.02902
0.00708943	2.04899	SUS4	sp|Q9LXL5|SUS4_ARATH Sucrose synthase 4 OS=Arabidopsis thaliana OX=3702 GN=SUS4 PE=1 SV=1	26.3217	26.3411	26.0064	25.9599	25.4206	25.2516	25.3997	24.4176		2.14939	1.03491
0.00729053	1.44449	XYLA	sp|Q9FKK7|XYLA_ARATH Xylose isomerase OS=Arabidopsis thaliana OX=3702 GN=XYLA PE=2 SV=2	28.1004	28.1925	28.1396	27.9374	27.8124	27.6902	27.4866	27.2584		2.13724	0.530564
0.00736444	0.735001	PIP1-2	sp|Q06611|PIP12_ARATH Aquaporin PIP1-2 OS=Arabidopsis thaliana OX=3702 GN=PIP1-2 PE=1 SV=1	30.088	29.9045	29.8862	30.2854	30.4279	30.3686	30.4895	30.6549		2.13286	-0.444182
0.00755063	0.652432	RAT5	sp|O81826|H2A3_ARATH Probable histone H2A.3 OS=Arabidopsis thaliana OX=3702 GN=At4g27230 PE=1 SV=1;sp|Q9C681|H2A1_ARATH Probable histone H2A.1 OS=Arabidopsis thaliana OX=3;sp|Q9LD28|H2A6_ARATH Histone H2A.6 OS=Arabidopsis thaliana OX=3702 GN=RAT5 PE=1 SV=1	30.07	30.4342	29.8667	30.402	30.8887	30.8675	30.8979	30.5832		2.12202	-0.616101
0.00756072	0.752042	ISPF	sp|Q9CAK8|ISPF_ARATH 2-C-methyl-D-erythritol 2,4-cyclodiphosphate synthase, chloroplastic OS=Arabidopsis thaliana OX=3702 GN=ISPF PE=1 SV=1	25.5425	25.7871	25.5452	25.6457	25.914	26.0406	26.2869	25.9236		2.12144	-0.411115
0.0076211	0.747466	HDT2	sp|Q56WH4|HDT2_ARATH Histone deacetylase HDT2 OS=Arabidopsis thaliana OX=3702 GN=HDT2 PE=1 SV=2	29.1675	29.1163	29.3361	29.1552	29.861	29.5924	29.6023	29.399		2.11798	-0.419919
0.00765983	1.67475	LPLAT1	sp|F4IDU4|MBOA1_ARATH Lysophospholipid acyltransferase 1 OS=Arabidopsis thaliana OX=3702 GN=LPCAT1 PE=1 SV=1	27.5569	27.4467	28.0704	27.8789	26.9275	27.1854	26.6752	27.1891		2.11578	0.743949
0.00791596	0.691116	APUM24	sp|Q9LRZ3|PUM24_ARATH Pumilio homolog 24 OS=Arabidopsis thaliana OX=3702 GN=APUM24 PE=1 SV=1	25.1345	25.0484	24.6925	25.0349	25.6705	25.4212	25.2842	25.6665		2.1015	-0.533
0.00809939	0.559182	EXPA1	sp|Q9C554|EXPA1_ARATH Expansin-A1 OS=Arabidopsis thaliana OX=3702 GN=EXPA1 PE=2 SV=1	25.4878	25.9714	25.096	25.965	26.5972	26.3884	26.4418	26.4472		2.09155	-0.838609
0.00850035	1.39279	RFS5	sp|Q9FND9|RFS5_ARATH Probable galactinol--sucrose galactosyltransferase 5 OS=Arabidopsis thaliana OX=3702 GN=RFS5 PE=1 SV=1	27.308	27.3747	27.0837	27.4888	26.9707	26.9108	26.5694	26.8924		2.07056	0.477976
0.00853197	1.31701	UXS6	sp|Q9ZV36|UXS6_ARATH UDP-glucuronic acid decarboxylase 6 OS=Arabidopsis thaliana OX=3702 GN=UXS6 PE=2 SV=1	28.2495	28.5145	28.5365	28.2932	27.9234	28.1521	27.8401	28.0889		2.06895	0.397264
0.00853575	1.42542	GSTF2;GSTF3	sp|P46422|GSTF2_ARATH Glutathione S-transferase F2 OS=Arabidopsis thaliana OX=3702 GN=GSTF2 PE=1 SV=3;sp|Q9SLM6|GSTF3_ARATH Glutathione S-transferase F3 OS=Arabidopsis thaliana OX=3702 GN=GSTF3 PE=2 SV=1	33.5948	33.6308	33.8448	33.5731	33.2644	33.1883	33.3364	32.8088		2.06876	0.511388
0.00868255	1.32213	ABA2	sp|Q9C826|ABA2_ARATH Xanthoxin dehydrogenase OS=Arabidopsis thaliana OX=3702 GN=ABA2 PE=1 SV=1	26.9232	26.7423	26.5468	26.5546	26.3065	26.3606	26.1268	26.3616		2.06135	0.402859
0.00869644	0.745542	PUR3	sp|P52422|PUR3_ARATH Phosphoribosylglycinamide formyltransferase, chloroplastic OS=Arabidopsis thaliana OX=3702 GN=PUR3 PE=2 SV=2	24.3376	24.6452	24.4769	24.431	24.8011	25.0862	24.6945	25.0035		2.06066	-0.423638
0.00883295	1.32941	PHOS34	sp|Q8L4N1|PHO34_ARATH Universal stress protein PHOS34 OS=Arabidopsis thaliana OX=3702 GN=PHOS34 PE=1 SV=1	27.4663	27.5261	27.7308	27.4309	27.2309	27.3111	26.9805	26.9884		2.05389	0.410789
0.008904	1.37598	GLPK	sp|Q9M8L4|GLPK_ARATH Glycerol kinase OS=Arabidopsis thaliana OX=3702 GN=GLPK PE=1 SV=1	28.9499	29.022	28.9382	28.6562	28.6095	28.5618	28.2984	28.2547		2.05041	0.460464
0.00895156	1.39394	UGE1	sp|Q42605|UGE1_ARATH Bifunctional UDP-glucose 4-epimerase and UDP-xylose 4-epimerase 1 OS=Arabidopsis thaliana OX=3702 GN=UGE1 PE=1 SV=2	27.2138	27.3123	27.5037	26.9989	26.7411	26.8039	26.9512	26.616		2.0481	0.479166
0.009249	0.701057	VHA-G1	sp|O82628|VATG1_ARATH V-type proton ATPase subunit G1 OS=Arabidopsis thaliana OX=3702 GN=VHA-G1 PE=1 SV=1	30.1282	30.4413	30.1252	30.0578	30.447	30.9535	30.7473	30.6544		2.03391	-0.512396
0.0096672	1.98627	GSTU10	sp|Q9CA57|GSTUA_ARATH Glutathione S-transferase U10 OS=Arabidopsis thaliana OX=3702 GN=GSTU10 PE=2 SV=1	26.8094	27.1225	27.0083	26.0426	25.8195	25.9848	25.7392	25.479		2.0147	0.990064
0.00969268	1.52693	IBR3	sp|Q8RWZ3|IBR3_ARATH Probable acyl-CoA dehydrogenase IBR3 OS=Arabidopsis thaliana OX=3702 GN=IBR3 PE=1 SV=1	27.1377	27.3585	27.3379	26.7502	26.6665	26.6543	26.5097	26.3112		2.01356	0.610633
0.00990788	0.693342	PIP2-7	sp|P93004|PIP27_ARATH Aquaporin PIP2-7 OS=Arabidopsis thaliana OX=3702 GN=PIP2-7 PE=1 SV=2	28.8322	28.7393	28.3553	28.9113	29.2496	29.2757	29.0431	29.3831		2.00402	-0.52836
0.00991575	0.742299	TBL26	sp|O04621|TBL26_ARATH Protein trichome birefringence-like 26 OS=Arabidopsis thaliana OX=3702 GN=TBL26 PE=2 SV=1	28.721	28.8623	28.8989	28.8998	29.0627	29.2005	29.2662	29.5724		2.00367	-0.429928
0.00991899	0.605614	PPOX1	sp|P55826|PPOC_ARATH Protoporphyrinogen oxidase 1, chloroplastic OS=Arabidopsis thaliana OX=3702 GN=PPOX1 PE=1 SV=1	25.0976	24.8793	24.8826	24.8923	25.4377	25.5678	26.2152	25.4253		2.00353	-0.723529
0.00998199	0.746579	HEN2	sp|Q9ZVW2|HEN2_ARATH DExH-box ATP-dependent RNA helicase DExH10 OS=Arabidopsis thaliana OX=3702 GN=HEN2 PE=1 SV=2	26.869	26.8674	26.9534	26.8465	27.138	27.4891	27.0899	27.5058		2.00078	-0.421633
0.0100048	2.23364	AXL	sp|Q9ZV69|AXL1_ARATH NEDD8-activating enzyme E1 regulatory subunit AXL OS=Arabidopsis thaliana OX=3702 GN=AXL1 PE=1 SV=1	24.9311	24.6375	25.0162	24.8998	24.3358	23.3831	24.0898	23.0384		1.99979	1.15939
0.0100378	0.557573	OM64	sp|F4KCL7|OE64M_ARATH Outer envelope protein 64, mitochondrial OS=Arabidopsis thaliana OX=3702 GN=OM64 PE=1 SV=1	23.7448	24.6038	24.5456	24.4982	24.9421	25.3563	25.0955	25.3696		1.99836	-0.842767
0.0100823	1.4502	At3g63550	sp|E0X9N4|C3H69_ARATH Putative RING-type E3 ubiquitin transferase C3H69 OS=Arabidopsis thaliana OX=3702 GN=At3g63550 PE=3 SV=1	26.1767	26.0105	25.6863	25.8196	25.41	25.5948	25.1251	25.4182		1.99644	0.536251
0.0103513	0.438304	RPL35AC;RPL35AA	sp|Q9C912|R35A3_ARATH 60S ribosomal protein L35a-3 OS=Arabidopsis thaliana OX=3702 GN=RPL35AC PE=3 SV=1;sp|Q9LMK0|R35A1_ARATH 60S ribosomal protein L35a-1 OS=Arabidopsis thaliana OX=3702 GN=RPL35AA PE=3 SV=1	25.9969	26.0914	26.2315	26.2155	27.7093	27.7272	27.4758	26.3832		1.98501	-1.19
0.0103685	0.710635		sp|O82201|AP4S_ARATH AP-4 complex subunit sigma OS=Arabidopsis thaliana OX=3702 GN=At2g19790 PE=1 SV=1	25.2073	25.1122	25.5802	25.4697	25.9096	25.6194	25.9748	25.837		1.98429	-0.492818
0.0104278	0.74828	OLI2	sp|Q9FG73|NOP2A_ARATH 25S rRNA (cytosine-C(5))-methyltransferase NOP2A OS=Arabidopsis thaliana OX=3702 GN=NOP2A PE=1 SV=1	25.8596	25.6433	25.7514	25.8954	25.9993	26.2881	26.4406	26.0951		1.98181	-0.418349
0.0106392	1.83953	RPT4B	sp|Q9MAK9|PS10B_ARATH 26S proteasome regulatory subunit S10B homolog B OS=Arabidopsis thaliana OX=3702 GN=RPT4B PE=1 SV=1	27.7778	28.0239	28.1691	27.8725	26.5764	27.2061	26.9092	27.6342		1.97309	0.879341
0.0107033	1.66868	UGT76C2	sp|Q9FIA0|U76C2_ARATH UDP-glycosyltransferase 76C2 OS=Arabidopsis thaliana OX=3702 GN=UGT76C2 PE=1 SV=1	24.8981	25.0757	24.8714	25.0149	24.278	24.4531	24.5176	23.6566		1.97048	0.73871
0.0111836	0.668502	PAP3	sp|O82291|PAP3_ARATH Probable plastid-lipid-associated protein 3, chloroplastic OS=Arabidopsis thaliana OX=3702 GN=PAP3 PE=1 SV=1	26.541	26.6473	26.8077	26.6458	26.8135	27.5078	27.3802	27.2644		1.95142	-0.580996
0.0112339	1.41904	SSL5	sp|Q9CAZ7|SSL5_ARATH Protein STRICTOSIDINE SYNTHASE-LIKE 5 OS=Arabidopsis thaliana OX=3702 GN=SSL5 PE=2 SV=1	26.1179	26.2429	26.5661	25.9398	25.7038	25.8326	25.6078	25.7029		1.94947	0.504918
0.011237	0.271739	LTP2	sp|Q9S7I3|NLTP2_ARATH Non-specific lipid-transfer protein 2 OS=Arabidopsis thaliana OX=3702 GN=LTP2 PE=3 SV=1	27.6239	26.6802	27.607	26.4219	28.436	28.8629	30.1719	28.3811		1.94935	-1.87971
0.0112852	0.55491		sp|Q9LJP2|GDL51_ARATH GDSL esterase/lipase At3g14220 OS=Arabidopsis thaliana OX=3702 GN=At3g14220 PE=2 SV=1	24.796	24.5656	24.8609	24.743	25.1048	25.3523	26.1295	25.7776		1.94749	-0.849674
0.011499	0.292869	FD1	sp|O04090|FER1_ARATH Ferredoxin-1, chloroplastic OS=Arabidopsis thaliana OX=3702 GN=FD1 PE=1 SV=1	23.2268	23.7645	23.0962	22.8533	24.7541	25.2588	26.091	23.9234		1.93934	-1.77167
0.0116094	0.735218	BFRUCT4	sp|Q39041|INVA4_ARATH Acid beta-fructofuranosidase 4, vacuolar OS=Arabidopsis thaliana OX=3702 GN=BFRUCT4 PE=1 SV=2	27.4222	27.4425	27.34	27.6579	27.8768	27.9178	27.669	28.1741		1.93519	-0.443756
0.0123231	1.54993	RTNLB4	sp|Q9FFS0|RTNLD_ARATH Reticulon-like protein B4 OS=Arabidopsis thaliana OX=3702 GN=RTNLB4 PE=1 SV=1	27.7029	27.7503	27.4245	27.7327	26.9729	26.8044	26.813	27.4914		1.90928	0.632206
0.0125235	0.585197		sp|O64628|TXND9_ARATH Thioredoxin domain-containing protein 9 homolog OS=Arabidopsis thaliana OX=3702 GN=At2g18990 PE=2 SV=1	24.9883	24.8147	25.084	25.2973	25.599	26.1632	25.381	26.133		1.90228	-0.773005
0.0125903	1.48188	ECH2	sp|Q8VYI3|ECH2_ARATH Enoyl-CoA hydratase 2, peroxisomal OS=Arabidopsis thaliana OX=3702 GN=ECH2 PE=1 SV=1	27.5876	27.7698	27.7315	27.2744	27.184	27.1308	27.0985	26.6803		1.89996	0.567433
0.0126686	1.56874	DHNAT1	sp|Q9SX65|DNAT1_ARATH 1,4-dihydroxy-2-naphthoyl-CoA thioesterase 1 OS=Arabidopsis thaliana OX=3702 GN=DHNAT1 PE=1 SV=1	27.0276	27.3671	27.4824	27.0762	26.2527	26.8825	26.4309	26.7888		1.89727	0.649607
0.0130505	0.680321	ABCG37	sp|Q9LFH0|AB37G_ARATH ABC transporter G family member 37 OS=Arabidopsis thaliana OX=3702 GN=ABCG37 PE=1 SV=1	26.1698	26.4303	26.7542	26.3652	26.7996	27.281	26.9226	26.9391		1.88437	-0.555712
0.013058	0.682271	SG1	sp|Q9LS48|SG1_ARATH protein SLOW GREEN 1, chloroplastic OS=Arabidopsis thaliana OX=3702 GN=SG1 PE=1 SV=1	26.2759	26.2917	25.9283	26.2567	26.5625	26.5882	27.1294	26.679		1.88412	-0.551583
0.013476	1.90868	ASD1	sp|Q9SG80|ASD1_ARATH Alpha-L-arabinofuranosidase 1 OS=Arabidopsis thaliana OX=3702 GN=ASD1 PE=1 SV=1	26.5518	26.4001	26.1185	27.003	25.5382	25.3268	25.3233	26.1549		1.87044	0.932574
0.0134887	0.258902		sp|Q8LFJ5|T112A_ARATH Multifunctional methyltransferase subunit TRM112 homolog A OS=Arabidopsis thaliana OX=3702 GN=TRM112A PE=1 SV=1	26.1566	24.0065	24.9732	23.6924	26.9213	26.6978	26.534	26.4738		1.87003	-1.94952
0.0135585	4.13512	NIC3	sp|Q9FMX8|NIC3_ARATH Nicotinamidase 3 OS=Arabidopsis thaliana OX=3702 GN=NIC3 PE=1 SV=1	26.6838	26.7099	26.7836	26.0109	24.5161	22.9704	24.8373	25.6726		1.86779	2.04793
0.0136588	1.42984		sp|Q9FG23|CK5P3_ARATH CDK5RAP3-like protein OS=Arabidopsis thaliana OX=3702 GN=At5g06830 PE=2 SV=2	25.8648	25.9688	25.739	25.8076	25.4261	25.4606	24.9088	25.5211		1.86459	0.515855
0.0137096	1.5083	JAL35	sp|O04309|JAL35_ARATH Jacalin-related lectin 35 OS=Arabidopsis thaliana OX=3702 GN=JAL35 PE=1 SV=1	29.0258	29.1017	28.4725	28.8983	28.5089	28.0292	28.2554	28.3331		1.86298	0.59292
0.0139331	0.388705	ABCI17	sp|Q9C9W0|AB17I_ARATH ABC transporter I family member 17 OS=Arabidopsis thaliana OX=3702 GN=ABCI17 PE=2 SV=1	24.3889	24.0923	23.5056	23.2111	24.6322	25.6572	24.6804	25.6812		1.85595	-1.36325
0.0139366	0.681875	TAF15B	sp|Q94KD0|TA15B_ARATH Transcription initiation factor TFIID subunit 15b OS=Arabidopsis thaliana OX=3702 GN=TAF15B PE=1 SV=1	25.7243	25.2173	25.9539	25.5354	26.2668	26.1221	26.1737	26.0779		1.85584	-0.552421
0.0140398	1.55545	VPS28-1	sp|O65421|VP281_ARATH Vacuolar protein sorting-associated protein 28 homolog 1 OS=Arabidopsis thaliana OX=3702 GN=VPS28-1 PE=1 SV=1	26.6954	26.6644	26.7761	26.4948	26.4356	26.1068	25.5857	25.9532		1.85264	0.637335
0.0145513	0.713698	RPL35D	sp|Q9LZ41|RL354_ARATH 60S ribosomal protein L35-4 OS=Arabidopsis thaliana OX=3702 GN=RPL35D PE=2 SV=1	26.5506	26.3838	26.7923	26.8497	27.3416	26.9809	27.2357	26.9647		1.8371	-0.486615
0.0146349	8.04791	SDH7B	sp|Q3E870|SDH7B_ARATH Succinate dehydrogenase subunit 7B, mitochondrial OS=Arabidopsis thaliana OX=3702 GN=SDH7B PE=1 SV=1	27.7593	27.6397	27.3589	27.4441	23.5447	23.8196	23.6205	27.1828		1.83461	3.00862
0.0146739	0.625719	SBT4.12	sp|Q8L7D2|SBT4C_ARATH Subtilisin-like protease SBT4.12 OS=Arabidopsis thaliana OX=3702 GN=SBT4.12 PE=2 SV=1	27.3631	27.4375	27.677	27.8655	28.3457	28.2675	27.8249	28.6106		1.83345	-0.676413
0.0148089	0.58367		sp|Q8RWQ9|ALEUL_ARATH Thiol protease aleurain-like OS=Arabidopsis thaliana OX=3702 GN=At3g45310 PE=2 SV=1	26.5296	26.3719	26.1871	26.4622	26.6503	26.9985	27.3572	27.6519		1.82948	-0.776775
0.014965	0.646186	MSL1	sp|Q8VZL4|MSL1_ARATH Mechanosensitive ion channel protein 1, mitochondrial OS=Arabidopsis thaliana OX=3702 GN=MSL1 PE=1 SV=1	25.0449	25.528	24.9839	25.2926	25.6207	25.608	25.9605	26.18		1.82492	-0.629978
0.0153528	0.68605	SRS	sp|Q8RWT8|SYSM_ARATH Serine--tRNA ligase, chloroplastic/mitochondrial OS=Arabidopsis thaliana OX=3702 GN=OVA7 PE=2 SV=1	23.7536	24.1643	23.8272	24.3082	24.4769	24.3409	24.7622	24.6478		1.81381	-0.543614
0.0159187	0.508558		sp|Q9SD53|Y3720_ARATH UPF0481 protein At3g47200 OS=Arabidopsis thaliana OX=3702 GN=At3g47200 PE=2 SV=1	24.3071	23.1247	23.525	23.726	24.9026	24.8866	24.2261	24.5695		1.79809	-0.975515
0.0164075	0.693264	NUP85	sp|Q8RXH2|NUP85_ARATH Nuclear pore complex protein NUP85 OS=Arabidopsis thaliana OX=3702 GN=NUP85 PE=1 SV=1	24.3608	24.9334	24.7543	24.4523	24.909	25.2828	25.1306	25.2926		1.78496	-0.528523
0.0164353	0.566978	CLPR1	sp|Q9XJ35|CLPR1_ARATH ATP-dependent Clp protease proteolytic subunit-related protein 1, chloroplastic OS=Arabidopsis thaliana OX=3702 GN=CLPR1 PE=1 SV=1	25.3966	24.9553	25.2909	25.2781	26.0163	25.6709	26.7023	25.806		1.78422	-0.818636
0.0168053	0.156929	HDA9	sp|Q8H0W2|HDA9_ARATH Histone deacetylase 9 OS=Arabidopsis thaliana OX=3702 GN=HDA9 PE=1 SV=1	23.0349	26.8317	24.2432	24.4214	26.9956	27.4666	27.0311	27.7251		1.77455	-2.67181
0.0173666	1.48023		sp|Q9LSE7|B561C_ARATH Cytochrome b561 and DOMON domain-containing protein At3g25290 OS=Arabidopsis thaliana OX=3702 GN=At3g25290 PE=2 SV=1	26.2838	26.1964	25.6031	26.0928	25.6308	25.5838	25.2559	25.4423		1.76028	0.565825
0.0174247	1.46294	GSTL3	sp|Q9LZ06|GSTL3_ARATH Glutathione S-transferase L3 OS=Arabidopsis thaliana OX=3702 GN=GSTL3 PE=2 SV=1	28.2285	28.3256	28.1962	27.8439	27.5956	27.6248	27.9118	27.2666		1.75883	0.548867
0.0175221	0.616346	UGT80A2	sp|Q9M8Z7|U80A2_ARATH Sterol 3-beta-glucosyltransferase UGT80A2 OS=Arabidopsis thaliana OX=3702 GN=UGT80A2 PE=1 SV=1	22.8486	23.5997	23.4357	23.5592	23.9865	24.1354	24.3564	23.7577		1.75641	-0.698189
0.0176041	0.167109	TIM23-2	sp|Q38820|TI232_ARATH Mitochondrial import inner membrane translocase subunit TIM23-2 OS=Arabidopsis thaliana OX=3702 GN=TIM23-2 PE=1 SV=1	23.1733	23.9418	23.4837	23.9994	26.7802	26.8266	23.9517	27.3643		1.75439	-2.58114
0.0178286	0.426007	CYP63	sp|Q9LY75|CYP63_ARATH Peptidyl-prolyl cis-trans isomerase CYP63 OS=Arabidopsis thaliana OX=3702 GN=CYP63 PE=1 SV=1	24.5324	23.5046	22.9685	22.9288	24.7744	24.7149	24.8581	24.5111		1.74888	-1.23105
0.0187771	0.697021		sp|Q9FHX5|E1310_ARATH Glucan endo-1,3-beta-glucosidase 10 OS=Arabidopsis thaliana OX=3702 GN=At5g42100 PE=2 SV=1	26.4505	26.4436	26.029	26.6649	26.8675	27.0244	26.6756	27.1034		1.72637	-0.520727
0.0192257	0.618766	TBL39	sp|Q9SIN2|TBL39_ARATH Protein trichome birefringence-like 39 OS=Arabidopsis thaliana OX=3702 GN=TBL39 PE=2 SV=1	24.5126	24.3729	24.2957	24.3576	25.0284	25.6572	24.9936	24.6296		1.71612	-0.692533
0.0193071	2.06554	CAT2	sp|Q9ASS7|CAAT2_ARATH Cationic amino acid transporter 2, vacuolar OS=Arabidopsis thaliana OX=3702 GN=CAT2 PE=1 SV=1	25.2655	25.7052	24.8243	25.6967	24.1749	24.7667	23.6715	24.6924		1.71428	1.04652
0.019646	1.46136	MES9	sp|O23171|MES9_ARATH Methylesterase 9 OS=Arabidopsis thaliana OX=3702 GN=MES9 PE=1 SV=1	24.7934	24.8754	24.6598	24.7284	24.3254	24.509	23.7356	24.2978		1.70673	0.547307
0.0199458	1.4526	GSTU4	sp|Q9ZW27|GSTU4_ARATH Glutathione S-transferase U4 OS=Arabidopsis thaliana OX=3702 GN=GSTU4 PE=1 SV=1	26.7543	26.7719	27.0213	26.2846	26.3299	26.0656	26.018	26.264		1.70015	0.538636
0.0202461	0.154606	TOM2A	sp|Q9C5W7|TOM2A_ARATH Tobamovirus multiplication protein 2A OS=Arabidopsis thaliana OX=3702 GN=TOM2A PE=1 SV=1	23.1245	23.5039	23.3267	23.2327	23.4227	26.8602	26.8226	26.8555		1.69366	-2.69333
0.0206128	2.40635	PDF2.2	sp|Q39182|DEF02_ARATH Defensin-like protein 2 OS=Arabidopsis thaliana OX=3702 GN=PDF2.2 PE=2 SV=1	28.1962	28.6308	28.0957	28.1354	27.1394	26.1292	27.9764	26.7457		1.68586	1.26684
0.0230136	0.513937	AGP30	sp|P93013|AGP30_ARATH Non-classical arabinogalactan protein 30 OS=Arabidopsis thaliana OX=3702 GN=AGP30 PE=2 SV=1	25.6143	25.6778	25.7204	25.2649	26.6728	27.2907	25.8966	26.2586		1.63802	-0.960337
0.023924	1.54298	UGT72E1	sp|Q94A84|U72E1_ARATH UDP-glycosyltransferase 72E1 OS=Arabidopsis thaliana OX=3702 GN=UGT72E1 PE=1 SV=1	26.4113	26.5217	26.3973	25.9214	26.0854	25.7667	25.329	25.5677		1.62117	0.62572
0.024278	0.675554	AMY3	sp|Q94A41|AMY3_ARATH Alpha-amylase 3, chloroplastic OS=Arabidopsis thaliana OX=3702 GN=AMY3 PE=1 SV=1	28.6226	28.6971	28.3804	28.4953	29.2214	28.8746	29.564	28.7988		1.61479	-0.565856
0.0249826	0.506668	DIR20	sp|Q9C891|DIR20_ARATH Dirigent protein 20 OS=Arabidopsis thaliana OX=3702 GN=DIR20 PE=2 SV=1	26.1742	26.2781	26.2864	25.7291	27.5064	27.6039	27.0009	26.2801		1.60236	-0.980887
0.0253758	1.55313	CYP71B6	sp|O65787|C71B6_ARATH Cytochrome P450 71B6 OS=Arabidopsis thaliana OX=3702 GN=CYP71B6 PE=2 SV=1	27.4654	27.694	27.6204	27.0473	27.078	27.0254	26.8033	26.3797		1.59558	0.635178
0.0255114	20.9464	PUMP5	sp|Q9SJY5|PUMP5_ARATH Mitochondrial uncoupling protein 5 OS=Arabidopsis thaliana OX=3702 GN=PUMP5 PE=2 SV=1	29.7128	29.6555	29.522	24.1242	22.2918	24.0399	24.9278	24.2006		1.59327	4.38863
0.0255625	0.575252		sp|C0LGG8|Y5343_ARATH Probable LRR receptor-like serine/threonine-protein kinase At1g53430 OS=Arabidopsis thaliana OX=3702 GN=At1g53430 PE=1 SV=1	24.2419	23.5284	24.142	23.9473	24.3665	24.656	25.3902	24.6379		1.5924	-0.797733
0.0269579	1.6097	PER23	sp|O80912|PER23_ARATH Peroxidase 23 OS=Arabidopsis thaliana OX=3702 GN=PER23 PE=2 SV=1	29.5523	29.5678	29.7632	29.0509	29.038	28.9372	28.9524	28.2594		1.56931	0.686793
0.0269895	0.542881	XTH12	sp|Q9FKL9|XTH12_ARATH Probable xyloglucan endotransglucosylase/hydrolase protein 12 OS=Arabidopsis thaliana OX=3702 GN=XTH12 PE=2 SV=1	23.8259	23.2861	23.4358	24.4871	24.3477	24.6565	24.5389	25.017		1.56881	-0.881291
0.0288916	1.88207	PER51	sp|Q9SZE7|PER51_ARATH Peroxidase 51 OS=Arabidopsis thaliana OX=3702 GN=PER51 PE=2 SV=1	25.6418	25.3904	25.2631	25.1994	25.0137	23.6482	24.3593	24.8243		1.53923	0.912319
0.0289737	1.65527	FLS3	sp|Q9FFQ5|FLS3_ARATH Flavonol synthase 3 OS=Arabidopsis thaliana OX=3702 GN=FLS3 PE=2 SV=1	26.0576	25.6226	25.7215	26.0554	24.7722	25.2599	24.7852	25.7315		1.538	0.727063
0.0291419	0.328334	COX6B-3;COX6B-2	sp|Q945L0|CX6B2_ARATH Cytochrome c oxidase subunit 6b-2 OS=Arabidopsis thaliana OX=3702 GN=COX6B-2 PE=2 SV=1;sp|Q9SUD3|CX6B3_ARATH Cytochrome c oxidase subunit 6b-3 OS=Arabidopsis thaliana OX=3702 GN=COX6B-3 PE=2 SV=2	22.7504	23.5984	23.0588	24.3591	26.0894	25.2635	23.9721	24.8687		1.53548	-1.60676
0.0292917	0.566135	PME25	sp|Q94CB1|PME25_ARATH Probable pectinesterase/pectinesterase inhibitor 25 OS=Arabidopsis thaliana OX=3702 GN=PME25 PE=2 SV=1	24.9738	25.3336	24.8327	25.5666	25.4568	26.4782	25.7667	26.2881		1.53326	-0.820783
0.0293509	0.381949	F21M12.13	sp|O04496|AED3_ARATH Aspartyl protease AED3 OS=Arabidopsis thaliana OX=3702 GN=AED3 PE=1 SV=1	24.8582	24.6431	24.4884	25.6817	25.2509	26.4262	27.2454	26.3031		1.53238	-1.38855
0.0296454	1.68924	JAL32	sp|O04312|JAL32_ARATH Jacalin-related lectin 32 OS=Arabidopsis thaliana OX=3702 GN=JAL32 PE=2 SV=1	27.1094	26.9544	27.013	27.5777	26.2143	26.5686	25.8998	26.9464		1.52804	0.756374
0.029931	0.140871	BGLU32;BGLU31	sp|Q9FLU8|BGL32_ARATH Beta-glucosidase 32 OS=Arabidopsis thaliana OX=3702 GN=BGLU32 PE=2 SV=2;sp|Q9FLU9|BGL31_ARATH Beta-glucosidase 31 OS=Arabidopsis thaliana OX=3702 GN=BGLU31 PE=2 SV=1	23.7354	23.6914	23.9454	23.8534	27.7598	27.9195	27.1755	23.6809		1.52388	-2.82755
0.0302988	1.67583	SSL10	sp|Q4V3D9|SSL10_ARATH Protein STRICTOSIDINE SYNTHASE-LIKE 10 OS=Arabidopsis thaliana OX=3702 GN=SSL10 PE=2 SV=1	25.628	25.9848	25.7285	25.7761	24.8096	24.4307	25.3776	25.5201		1.51857	0.744877
0.0313414	1.60147	MES3	sp|O80477|MES3_ARATH Methylesterase 3 OS=Arabidopsis thaliana OX=3702 GN=MES3 PE=2 SV=1	26.6729	26.6606	26.6075	25.946	25.9945	26.0059	25.8715	25.2974		1.50388	0.6794
0.031495	0.544006	FEN1	sp|O65251|FEN1_ARATH Flap endonuclease 1 OS=Arabidopsis thaliana OX=3702 GN=FEN1 PE=3 SV=2	23.3592	24.255	23.7026	24.3976	24.3386	25.2677	24.6462	24.9752		1.50176	-0.878305
0.0319629	0.626848	APG	sp|Q9LU14|APG2_ARATH GDSL esterase/lipase APG OS=Arabidopsis thaliana OX=3702 GN=APG PE=2 SV=1	24.2298	24.4751	24.5949	24.0928	25.0561	25.181	25.427	24.4237		1.49535	-0.673813
0.0320313	0.603313	RPI3	sp|Q9S726|RPI3_ARATH Probable ribose-5-phosphate isomerase 3, chloroplastic OS=Arabidopsis thaliana OX=3702 GN=RPI3 PE=1 SV=1	27.1269	27.7459	27.6446	27.5237	27.8437	28.2542	28.8631	27.9962		1.49443	-0.729021
0.0339819	3.50012	PYL1	sp|Q8VZS8|PYL1_ARATH Abscisic acid receptor PYL1 OS=Arabidopsis thaliana OX=3702 GN=PYL1 PE=1 SV=1	26.3912	26.3449	26.4222	26.402	26.4111	24.183	24.4665	23.2701		1.46875	1.80741
0.0351727	0.168133	AtXYP8	sp|Q9LJ86|LTPG5_ARATH Non-specific lipid transfer protein GPI-anchored 5 OS=Arabidopsis thaliana OX=3702 GN=LTPG5 PE=2 SV=1	24.3128	24.2935	27.5228	27.6195	28.4453	28.3493	28.4176	28.8258		1.45379	-2.57233
0.035684	2.99113		sp|Q9M1B9|SCRK4_ARATH Probable fructokinase-4 OS=Arabidopsis thaliana OX=3702 GN=At3g59480 PE=2 SV=1	25.5201	25.4483	24.7099	25.3889	24.2674	22.1979	23.5339	24.7453		1.44753	1.58069
0.0357583	2.99476	NADP-ME1	sp|O82191|MAOP1_ARATH NADP-dependent malic enzyme 1 OS=Arabidopsis thaliana OX=3702 GN=NADP-ME1 PE=1 SV=1	26.1786	25.9433	26.5396	25.8495	24.4837	24.8399	25.7949	23.0627		1.44662	1.58244
0.0358814	7.00521	WNK4	sp|Q9LVL5|WNK4_ARATH Probable serine/threonine-protein kinase WNK4 OS=Arabidopsis thaliana OX=3702 GN=WNK4 PE=1 SV=1	27.8163	27.6308	27.8015	23.7776	24.7242	24.0237	23.1898	23.8547		1.44513	2.80843
0.03591	1.82379	AMC9	sp|Q9FYE1|MCA9_ARATH Metacaspase-9 OS=Arabidopsis thaliana OX=3702 GN=AMC9 PE=1 SV=1	24.9485	24.7484	24.5742	25.2375	23.3283	23.7632	24.6211	24.3282		1.44478	0.866938
0.036227	1.68306	SCPL48	sp|Q56WF8|SCP48_ARATH Serine carboxypeptidase-like 48 OS=Arabidopsis thaliana OX=3702 GN=SCPL48 PE=2 SV=2	27.5918	27.5665	27.1244	28.0589	26.7477	26.7521	26.4327	27.4047		1.44097	0.751088
0.0364925	1.7858	PER15	sp|Q9SI16|PER15_ARATH Peroxidase 15 OS=Arabidopsis thaliana OX=3702 GN=PER15 PE=2 SV=1	27.8417	27.7753	27.7982	27.2154	26.9619	27.4355	26.7773	26.1096		1.4378	0.836573
0.0388519	0.38026	LARP6B	sp|O80567|LRP6B_ARATH La-related protein 6B OS=Arabidopsis thaliana OX=3702 GN=LARP6B PE=1 SV=2	24.233	23.0933	24.7751	25.4102	25.4618	25.4406	25.9259	26.2632		1.41059	-1.39494
0.0393883	3.66727	ADT3	sp|Q9ZUY3|AROD3_ARATH Arogenate dehydratase 3, chloroplastic OS=Arabidopsis thaliana OX=3702 GN=ADT3 PE=1 SV=1	25.5695	25.9867	23.7922	26.306	24.362	23.9879	22.3283	23.4774		1.40463	1.8747
0.0401498	2.47405		sp|O64817|CSK23_ARATH Casein kinase II subunit alpha-3 OS=Arabidopsis thaliana OX=3702 GN=CKA3 PE=1 SV=1	25.0405	25.4395	24.4447	25.1807	23.8731	22.6982	24.8723	23.4343		1.39632	1.30688
0.0429304	2.65656	ENDO1	sp|Q9SXA6|ENDO1_ARATH Endonuclease 1 OS=Arabidopsis thaliana OX=3702 GN=ENDO1 PE=1 SV=1	26.269	25.9628	25.7768	26.7082	25.3636	25.879	23.6854	24.1505		1.36723	1.40956
0.0432061	0.563827	ISPG	sp|F4K0E8|ISPG_ARATH 4-hydroxy-3-methylbut-2-en-1-yl diphosphate synthase (ferredoxin), chloroplastic OS=Arabidopsis thaliana OX=3702 GN=ISPG PE=1 SV=1	24.9376	25.1387	24.8193	24.7885	25.3076	25.7689	26.6276	25.2867		1.36446	-0.826675
0.043626	0.438348	LRR-RLK	sp|Q9LSI9|BIR2_ARATH Inactive LRR receptor-like serine/threonine-protein kinase BIR2 OS=Arabidopsis thaliana OX=3702 GN=BIR2 PE=1 SV=1	24.3998	24.2857	23.182	23.0024	25.2486	25.4156	24.0983	24.8668		1.36025	-1.18985
0.0458817	0.405518	HIR1	sp|Q9FM19|HIR1_ARATH Hypersensitive-induced response protein 1 OS=Arabidopsis thaliana OX=3702 GN=HIR1 PE=1 SV=1	25.6658	24.6817	25.8321	23.6307	26.2157	26.5419	26.2053	26.056		1.33836	-1.30216
0.0478648	2.36728	RNS3	sp|P42815|RNS3_ARATH Ribonuclease 3 OS=Arabidopsis thaliana OX=3702 GN=RNS3 PE=2 SV=1	26.0251	25.7936	25.8056	26.4391	25.4991	25.2672	23.3788	24.9455		1.31998	1.24323
0.0480752	0.444201	TIC22	sp|Q9SZB2|TIC22_ARATH Protein TIC 22, chloroplastic OS=Arabidopsis thaliana OX=3702 GN=TIC22 PE=1 SV=1	23.2675	23.8082	25.2114	23.8173	25.4617	25.5607	25.2076	24.5573		1.31808	-1.17072
0.0513195	2.48614	HMGCL	sp|O81027|HMGCL_ARATH Hydroxymethylglutaryl-CoA lyase, mitochondrial OS=Arabidopsis thaliana OX=3702 GN=HMGCL PE=1 SV=2	25.1789	25.8116	25.5663	25.4055	23.1348	25.589	23.7149	24.2679		1.28972	1.31391
0.0513402	0.253704	RPL34C	sp|Q9LJW6|RL343_ARATH 60S ribosomal protein L34-3 OS=Arabidopsis thaliana OX=3702 GN=RPL34C PE=2 SV=1	27.0548	26.7626	24.0525	24.4554	27.4248	28.2268	26.9793	27.6094		1.28954	-1.97878
0.0519886	3.86978	GPP1	sp|F4JTE7|GPP1_ARATH (DL)-glycerol-3-phosphatase 1, mitochondrial OS=Arabidopsis thaliana OX=3702 GN=GPP1 PE=1 SV=1	26.9188	26.9525	26.9388	26.6744	23.0225	26.3049	26.2039	24.1441		1.28409	1.95225
0.0541285	3.02761	PER53	sp|P80679|PERA2_ARMRU Peroxidase A2 OS=Armoracia rusticana OX=3704 GN=HRPA2 PE=1 SV=1;sp|Q42578|PER53_ARATH Peroxidase 53 OS=Arabidopsis thaliana OX=3702 GN=PER53 PE=1 SV=1	25.9247	25.9844	25.7727	23.4179	24.0149	23.831	23.9261	22.9352		1.26657	1.59818
0.0545961	0.400735	MOS11	sp|Q9LZ08|MOS11_ARATH Protein MODIFIER OF SNC1 11 OS=Arabidopsis thaliana OX=3702 GN=MOS11 PE=1 SV=1	25.5835	25.7535	23.7951	26.0925	26.2856	26.5879	26.4183	27.2098		1.26284	-1.31928
0.0551581	5.45954	DSP4	sp|Q9FEB5|DSP4_ARATH Phosphoglucan phosphatase DSP4, chloroplastic OS=Arabidopsis thaliana OX=3702 GN=DSP4 PE=1 SV=1	25.8645	26.6885	26.5985	26.6812	23.709	22.3883	26.9348	23.0055		1.25839	2.44878
0.0571491	0.155675	EARLI1	sp|Q39176|ERLI1_ARATH Lipid transfer protein EARLI 1 OS=Arabidopsis thaliana OX=3702 GN=EARLI1 PE=1 SV=1;sp|Q9SU33|ERLL3_ARATH pEARLI1-like lipid transfer protein 3 OS=Arabidopsis thaliana OX=3702 GN=At4g12500 PE=2 SV=1;sp|Q9SU34|ERLL2_ARATH pEARLI1-like l	28.2339	23.9626	23.9481	24.2095	28.4817	28.5971	27.1835	26.8253		1.24299	-2.68339
0.0580349	3.59071	GLN1-4	sp|Q9FMD9|GLN14_ARATH Glutamine synthetase cytosolic isozyme 1-4 OS=Arabidopsis thaliana OX=3702 GN=GLN1-4 PE=1 SV=1	26.5352	26.4214	26.5396	26.1691	23.24	26.0104	25.8474	23.1903		1.23631	1.84427
0.0647673	0.208709	FH7	sp|Q9XIE0|FH7_ARATH Formin-like protein 7 OS=Arabidopsis thaliana OX=3702 GN=FH7 PE=2 SV=1	22.6088	23.9672	25.5844	23.6052	26.9833	27.2638	26.6951	23.8651		1.18864	-2.26044
0.0757731	4.6844	At5g44400	sp|Q9FKU8|BBE26_ARATH Berberine bridge enzyme-like 26 OS=Arabidopsis thaliana OX=3702 GN=At5g44400 PE=2 SV=1	29.3421	29.4539	27.9206	28.1348	27.6405	27.4341	27.2498	23.6155		1.12049	2.22786
0.0814481	0.0984457		sp|O04848|H2AXA_ARATH Probable histone H2AXa OS=Arabidopsis thaliana OX=3702 GN=At1g08880 PE=1 SV=1;sp|Q9S9K7|H2AXB_ARATH Probable histone H2AXb OS=Arabidopsis thaliana OX=3702 GN=At1g54690 PE=1 SV=1	24.3473	30.1813	23.8084	28.6792	29.3676	30.1685	30.5058	30.3524		1.08912	-3.34453
0.000147036	1.13545	SGPP	sp|Q9ZVJ5|SGGP_ARATH Haloacid dehalogenase-like hydrolase domain-containing protein Sgpp OS=Arabidopsis thaliana OX=3702 GN=SGPP PE=1 SV=2	27.2736	27.2085	27.1785	27.2118	27.0295	27.0301	27.059	27.0207		3.83258	0.183267
0.000208936	1.0983	NTR2	sp|Q39242|TRXB2_ARATH Thioredoxin reductase 2 OS=Arabidopsis thaliana OX=3702 GN=NTR2 PE=2 SV=2	30.149	30.1069	30.1304	30.073	29.9924	29.9747	29.9723	29.9788		3.67999	0.135275
0.000213068	0.861402	RANGAP1	sp|Q9LE82|RAGP1_ARATH RAN GTPase-activating protein 1 OS=Arabidopsis thaliana OX=3702 GN=RANGAP1 PE=1 SV=1	26.7685	26.7547	26.7037	26.6966	26.9904	26.9694	26.9038	26.9208		3.67148	-0.215241
0.000335265	0.874534	CARA	sp|Q9LVW7|CARA_ARATH Carbamoyl-phosphate synthase small chain, chloroplastic OS=Arabidopsis thaliana OX=3702 GN=CARA PE=1 SV=1	28.0491	28.0976	28.0467	27.9985	28.2778	28.2584	28.2294	28.1998		3.47461	-0.193414
0.000419638	0.855572	VHA-A	sp|O23654|VATA_ARATH V-type proton ATPase catalytic subunit A OS=Arabidopsis thaliana OX=3702 GN=VHA-A PE=1 SV=1	30.6425	30.6203	30.5976	30.6653	30.8685	30.9261	30.7884	30.8428		3.37713	-0.225038
0.000571011	1.15648	CYOP	sp|Q949P2|COPDA_ARATH Probable cytosolic oligopeptidase A OS=Arabidopsis thaliana OX=3702 GN=CYOP PE=1 SV=1	28.9843	28.9833	28.9638	28.919	28.7731	28.6986	28.7184	28.8214		3.24336	0.209744
0.000633878	1.18648	GSH2	sp|P46416|GSHB_ARATH Glutathione synthetase, chloroplastic OS=Arabidopsis thaliana OX=3702 GN=GSH2 PE=2 SV=3	28.6215	28.6342	28.6215	28.4914	28.3157	28.3621	28.3869	28.3171		3.19799	0.246692
0.000644408	1.16046	PM25	sp|P30184|AMPL1_ARATH Leucine aminopeptidase 1 OS=Arabidopsis thaliana OX=3702 GN=LAP1 PE=1 SV=1	30.5643	30.4956	30.6011	30.6012	30.3469	30.3001	30.4072	30.3492		3.19084	0.214694
0.000653172	1.1432	ENO3	sp|Q9ZW34|ENO3_ARATH Cytosolic enolase 3 OS=Arabidopsis thaliana OX=3702 GN=ENO3 PE=1 SV=1	26.4438	26.5097	26.4613	26.4766	26.2133	26.2851	26.2783	26.3424		3.18497	0.193073
0.000665846	1.10718	EYE	sp|Q9FGN0|COG7_ARATH Conserved oligomeric Golgi complex subunit 7 OS=Arabidopsis thaliana OX=3702 GN=COG7 PE=1 SV=1	26.1308	26.1061	26.1251	26.131	25.9998	26.0099	25.9122	25.9835		3.17663	0.146891
0.000691463	1.18625	RH38	sp|Q93ZG7|RH38_ARATH DEAD-box ATP-dependent RNA helicase 38 OS=Arabidopsis thaliana OX=3702 GN=RH38 PE=1 SV=2	28.109	28.0253	28.1015	28.1012	27.88	27.7698	27.7941	27.9075		3.16023	0.246405
0.000911024	1.06431	PAC1	sp|O81148|PSA4A_ARATH Proteasome subunit alpha type-4-A OS=Arabidopsis thaliana OX=3702 GN=PAC1 PE=1 SV=1	29.8789	29.8589	29.8704	29.9176	29.7859	29.7737	29.8093	29.7972		3.04047	0.0899248
0.000989214	0.8762		sp|Q9M8D3|PUR4_ARATH Probable phosphoribosylformylglycinamidine synthase, chloroplastic/mitochondrial OS=Arabidopsis thaliana OX=3702 GN=At1g74260 PE=2 SV=3	27.8334	27.7378	27.8514	27.807	27.9553	28.0365	27.9732	28.0272		3.00471	-0.190668
0.00104162	0.835848	EMB1144	sp|P57720|AROC_ARATH Chorismate synthase, chloroplastic OS=Arabidopsis thaliana OX=3702 GN=EMB1144 PE=2 SV=2	29.5938	29.497	29.6696	29.686	29.8603	29.881	29.8556	29.8841		2.98229	-0.258688
0.00111339	1.19434	APM1	sp|Q8VZH2|APM1_ARATH Aminopeptidase M1 OS=Arabidopsis thaliana OX=3702 GN=APM1 PE=1 SV=1	29.0896	29.0992	29.1352	28.9622	28.8562	28.8513	28.7697	28.7841		2.95335	0.256208
0.00113097	0.821366	VHA-D	sp|Q9XGM1|VATD_ARATH V-type proton ATPase subunit D OS=Arabidopsis thaliana OX=3702 GN=VHA-D PE=1 SV=2	28.4834	28.6061	28.5349	28.4553	28.8439	28.881	28.7234	28.767		2.94655	-0.283902
0.00116981	1.22513		sp|Q9SID0|SCRK1_ARATH Probable fructokinase-1 OS=Arabidopsis thaliana OX=3702 GN=At2g31390 PE=2 SV=1	32.4808	32.556	32.5112	32.3305	32.1933	32.1885	32.1371	32.1879		2.93188	0.292931
0.00126836	0.83585	SCPL29	sp|Q949Q7|SCP29_ARATH Serine carboxypeptidase-like 29 OS=Arabidopsis thaliana OX=3702 GN=SCPL29 PE=2 SV=1	26.3025	26.1939	26.2808	26.3278	26.5716	26.4718	26.6151	26.4813		2.89676	-0.258684
0.0013547	1.14459	UGE4	sp|Q9C7W7|UGE4_ARATH UDP-glucose 4-epimerase 4 OS=Arabidopsis thaliana OX=3702 GN=UGE4 PE=1 SV=1	26.5022	26.3894	26.5277	26.4725	26.281	26.326	26.2543	26.2513		2.86816	0.194826
0.00138307	1.15421	CICDH	sp|Q9SRZ6|ICDHC_ARATH Cytosolic isocitrate dehydrogenase [NADP] OS=Arabidopsis thaliana OX=3702 GN=CICDH PE=1 SV=1	31.7048	31.7047	31.6907	31.7481	31.4985	31.5274	31.4141	31.5806		2.85916	0.206911
0.00144553	1.20264	NLP3	sp|Q8RUF8|NILP3_ARATH Omega-amidase, chloroplastic OS=Arabidopsis thaliana OX=3702 GN=NLP3 PE=1 SV=1	27.5761	27.6252	27.7069	27.5569	27.4328	27.2996	27.3801	27.2878		2.83997	0.266201
0.00148137	1.22576		sp|Q9LIL4|P24B3_ARATH Transmembrane emp24 domain-containing protein p24beta3 OS=Arabidopsis thaliana OX=3702 GN=At3g22845 PE=2 SV=1	28.5298	28.5937	28.4609	28.4632	28.2687	28.1667	28.1273	28.3103		2.82934	0.293678
0.0017144	1.17507	PAG1	sp|O23715|PSA3_ARATH Proteasome subunit alpha type-3 OS=Arabidopsis thaliana OX=3702 GN=PAG1 PE=1 SV=2	29.5632	29.527	29.5853	29.4755	29.3723	29.3229	29.2025	29.3223		2.76589	0.232742
0.00176702	1.23043	HOP2	sp|Q5XEP2|HSOP2_ARATH Hsp70-Hsp90 organizing protein 2 OS=Arabidopsis thaliana OX=3702 GN=HOP2 PE=1 SV=1	28.4702	28.386	28.5307	28.3246	28.1975	28.1716	28.0648	28.081		2.75276	0.299164
0.00184133	1.11292	UBA1	sp|P93028|UBE11_ARATH Ubiquitin-activating enzyme E1 1 OS=Arabidopsis thaliana OX=3702 GN=UBA1 PE=1 SV=1	28.7013	28.7299	28.7271	28.7449	28.5732	28.5946	28.4943	28.6236		2.73487	0.15435
0.00208648	0.858151	APXS	sp|Q42592|APXS_ARATH L-ascorbate peroxidase S, chloroplastic/mitochondrial OS=Arabidopsis thaliana OX=3702 GN=APXS PE=1 SV=2	30.0128	30.0581	30.0852	30.073	30.1761	30.2852	30.2808	30.3699		2.68059	-0.220697
0.00212228	1.21997	PP2AB2	sp|Q39247|2ABB_ARATH Serine/threonine protein phosphatase 2A 55 kDa regulatory subunit B beta isoform OS=Arabidopsis thaliana OX=3702 GN=PP2AB2 PE=1 SV=1	26.6411	26.6077	26.7497	26.6435	26.3532	26.272	26.3728	26.4966		2.6732	0.286847
0.00212879	0.89834	APA1	sp|O65390|APA1_ARATH Aspartic proteinase A1 OS=Arabidopsis thaliana OX=3702 GN=APA1 PE=1 SV=1	30.6113	30.6613	30.6257	30.5933	30.727	30.8446	30.7936	30.745		2.67187	-0.154666
0.00213678	0.821413	VHA-E1	sp|Q39258|VATE1_ARATH V-type proton ATPase subunit E1 OS=Arabidopsis thaliana OX=3702 GN=VHA-E1 PE=1 SV=2	30.4935	30.5172	30.6036	30.5407	30.9105	30.9021	30.769	30.7088		2.67024	-0.283821
0.00215192	1.18557	UGGT	sp|Q0WL80|UGGG_ARATH UDP-glucose:glycoprotein glucosyltransferase OS=Arabidopsis thaliana OX=3702 GN=UGGT PE=1 SV=1	27.4232	27.3885	27.3344	27.3699	27.1577	27.1956	27.0031	27.1773		2.66717	0.245575
0.00217869	0.858168	BCAT3	sp|Q9M401|BCAT3_ARATH Branched-chain-amino-acid aminotransferase 3, chloroplastic OS=Arabidopsis thaliana OX=3702 GN=BCAT3 PE=1 SV=1	28.3712	28.4012	28.3295	28.3742	28.5473	28.6996	28.514	28.5977		2.6618	-0.220667
0.0022922	1.13487	At3g02760	sp|F4IYF8|SYHC_ARATH Histidine--tRNA ligase, cytoplasmic OS=Arabidopsis thaliana OX=3702 GN=At3g02760 PE=2 SV=1	27.4706	27.4654	27.3814	27.443	27.2855	27.2082	27.2088	27.3278		2.63975	0.182522
0.00230027	1.17291	RPN3A	sp|Q9LNU4|PSD3A_ARATH 26S proteasome non-ATPase regulatory subunit 3 homolog A OS=Arabidopsis thaliana OX=3702 GN=RPN3A PE=1 SV=3	28.7089	28.6665	28.6037	28.5827	28.4615	28.3778	28.3274	28.4749		2.63822	0.230086
0.00236687	1.20197		sp|Q9SVN5|SYMC_ARATH Methionine--tRNA ligase, cytoplasmic OS=Arabidopsis thaliana OX=3702 GN=At4g13780 PE=2 SV=1	28.3801	28.4753	28.3945	28.2624	28.1822	28.1304	28.0441	28.094		2.62583	0.265398
0.00238825	1.24282	CTIMC	sp|P48491|TPIS_ARATH Triosephosphate isomerase, cytosolic OS=Arabidopsis thaliana OX=3702 GN=CTIMC PE=1 SV=2	32.7409	32.7398	32.8535	32.6425	32.4829	32.3227	32.5234	32.3934		2.62192	0.313616
0.00242612	1.23756	RPN8A	sp|O24412|PSD7A_ARATH 26S proteasome non-ATPase regulatory subunit 7 homolog A OS=Arabidopsis thaliana OX=3702 GN=RPN8A PE=1 SV=1	28.6123	28.4019	28.4335	28.4915	28.2121	28.0922	28.133	28.272		2.61509	0.307502
0.00247501	0.84172	VHA-C	sp|Q9SDS7|VATC_ARATH V-type proton ATPase subunit C OS=Arabidopsis thaliana OX=3702 GN=VHA-C PE=1 SV=1	29.7431	29.8144	29.8576	29.7905	30.1268	30.1204	29.9517	30.0009		2.60642	-0.248588
0.00254699	1.1692	GPX8	sp|Q8LBU2|GPX8_ARATH Probable glutathione peroxidase 8 OS=Arabidopsis thaliana OX=3702 GN=GPX8 PE=2 SV=1	28.1765	28.1086	28.1581	28.1016	28.0234	27.9216	27.8599	27.8378		2.59397	0.225519
0.00258884	0.825057	AKHSDH2	sp|O81852|AKH2_ARATH Bifunctional aspartokinase/homoserine dehydrogenase 2, chloroplastic OS=Arabidopsis thaliana OX=3702 GN=AKHSDH2 PE=1 SV=1	25.7555	25.7991	25.6942	25.8577	25.9467	26.0681	26.04	26.1614		2.5869	-0.277434
0.00265571	1.23551	PDIL1-6	sp|Q66GQ3|PDI16_ARATH Protein disulfide isomerase-like 1-6 OS=Arabidopsis thaliana OX=3702 GN=PDIL1-6 PE=2 SV=1	27.644	27.7559	27.6339	27.722	27.3452	27.5024	27.2523	27.4355		2.57582	0.305102
0.00267314	0.803516	HDT3	sp|Q9LZR5|HDT3_ARATH Histone deacetylase HDT3 OS=Arabidopsis thaliana OX=3702 GN=HDT3 PE=1 SV=2	27.32	27.3076	27.422	27.189	27.6956	27.693	27.5167	27.5957		2.57298	-0.315602
0.00276819	0.815167	CPN60B3	sp|C0Z361|CPNB3_ARATH Chaperonin 60 subunit beta 3, chloroplastic OS=Arabidopsis thaliana OX=3702 GN=CPN60B3 PE=1 SV=1	30.2118	30.2289	30.0965	30.3282	30.4513	30.4474	30.6	30.546		2.5578	-0.294833
0.0027895	1.11957	HPR2	sp|Q9CA90|HPR2_ARATH Glyoxylate/hydroxypyruvate reductase A HPR2 OS=Arabidopsis thaliana OX=3702 GN=HPR2 PE=1 SV=1	28.5553	28.6479	28.5776	28.602	28.4236	28.4512	28.4922	28.3639		2.55447	0.162951
0.00280612	0.894592	DAP	sp|Q93ZN9|DAPAT_ARATH LL-diaminopimelate aminotransferase, chloroplastic OS=Arabidopsis thaliana OX=3702 GN=DAP PE=1 SV=1	28.5618	28.6639	28.6433	28.7041	28.823	28.7975	28.7673	28.8281		2.55189	-0.160698
0.00283071	1.21388	ATR1	sp|Q9SB48|NCPR1_ARATH NADPH--cytochrome P450 reductase 1 OS=Arabidopsis thaliana OX=3702 GN=ATR1 PE=1 SV=1	27.0461	26.9845	26.9007	27.0208	26.7794	26.7451	26.5666	26.7425		2.5481	0.279632
0.00294719	1.18367	At4g10320	sp|F4JLM5|SYIC_ARATH Isoleucine--tRNA ligase, cytoplasmic OS=Arabidopsis thaliana OX=3702 GN=At4g10320 PE=2 SV=1	28.0599	28.0819	28.0511	28.0689	27.9209	27.8074	27.6891	27.8712		2.53059	0.243268
0.0029857	0.862433		sp|P05466|AROA_ARATH 3-phosphoshikimate 1-carboxyvinyltransferase, chloroplastic OS=Arabidopsis thaliana OX=3702 GN=At2g45300 PE=2 SV=3	28.2593	28.2268	28.2803	28.2043	28.5575	28.4837	28.3696	28.4141		2.52495	-0.213516
0.00299274	0.847964	VHA-a3	sp|Q8W4S4|VHAA3_ARATH V-type proton ATPase subunit a3 OS=Arabidopsis thaliana OX=3702 GN=VHA-a3 PE=1 SV=1	28.5951	28.5711	28.6187	28.5371	28.91	28.8642	28.6955	28.8039		2.52393	-0.237926
0.00315702	1.17467	THRRS	sp|O04630|SYTM1_ARATH Threonine--tRNA ligase, mitochondrial 1 OS=Arabidopsis thaliana OX=3702 GN=THRRS PE=1 SV=3	28.9005	28.909	28.7712	28.8328	28.6411	28.5943	28.5377	28.7113		2.50072	0.232255
0.00317258	1.15983	BPA1	sp|Q9LFD5|BPA1_ARATH Binding partner of ACD11 1 OS=Arabidopsis thaliana OX=3702 GN=BPA1 PE=1 SV=1	28.4797	28.3094	28.3688	28.3227	28.2231	28.1451	28.1163	28.1405		2.49859	0.213918
0.00320801	0.834137	RPS10B	sp|Q9FFS8|RS102_ARATH 40S ribosomal protein S10-2 OS=Arabidopsis thaliana OX=3702 GN=RPS10B PE=2 SV=1	29.9647	29.8424	29.7492	29.8032	30.167	30.089	30.0219	30.1282		2.49376	-0.261643
0.00328189	1.21392	SRP19	sp|Q943Z6|SRP19_ARATH Signal recognition particle 19 kDa protein OS=Arabidopsis thaliana OX=3702 GN=SRP19 PE=1 SV=1	26.2382	26.2796	26.2717	26.1748	26.0831	25.8922	25.8501	26.0201		2.48388	0.27967
0.00334581	1.14176	AMC4	sp|O64517|MCA4_ARATH Metacaspase-4 OS=Arabidopsis thaliana OX=3702 GN=AMC4 PE=1 SV=1	28.7098	28.8179	28.7659	28.6845	28.5866	28.6113	28.5255	28.4898		2.4755	0.191257
0.00345138	1.05	A2;A4;A3;A1	sp|Q0WL56|EF1A3_ARATH Elongation factor 1-alpha 3 OS=Arabido;sp|Q8GTY0|EF1A4_ARATH Elongation factor 1-alpha 4 OS=Arabidopsis thaliana OX=3702 GN=A4 PE=1 SV=2;sp|Q8W4H7|EF1A2_ARATH Elongation factor 1-alpha 2 OS=Arabidopsis thaliana OX=3702 GN=A2 PE=1 SV=2	34.1403	34.1313	34.1084	34.1557	34.0637	34.0331	34.0694	34.088		2.46201	0.070384
0.00352952	0.822087	NUP205	sp|F4KBW6|NU205_ARATH Nuclear pore complex protein NUP205 OS=Arabidopsis thaliana OX=3702 GN=NUP205 PE=1 SV=1	24.8642	24.8112	24.8588	24.9751	25.2277	25.2353	25.0194	25.1576		2.45228	-0.282637
0.00354299	1.17426		sp|Q9SGE9|SYFB_ARATH Phenylalanine--tRNA ligase beta subunit, cytoplasmic OS=Arabidopsis thaliana OX=3702 GN=At1g72550 PE=2 SV=1	27.9893	28.0161	27.9411	28.0312	27.8099	27.7351	27.6478	27.8579		2.45063	0.23175
0.00357962	0.883293	PHB1	sp|O49460|PHB1_ARATH Prohibitin-1, mitochondrial OS=Arabidopsis thaliana OX=3702 GN=PHB1 PE=1 SV=1	27.6873	27.58	27.6742	27.6468	27.7673	27.8165	27.8094	27.9113		2.44616	-0.179036
0.00363974	0.834897	MCO15.15	sp|Q9FLP3|MGE1_ARATH GrpE protein homolog 1, mitochondrial OS=Arabidopsis thaliana OX=3702 GN=Mge1 PE=2 SV=1	26.8504	26.8143	26.8938	26.9827	27.2114	27.2093	27.0278	27.1341		2.43893	-0.26033
0.00372866	1.0904	GRF1	sp|P42643|14331_ARATH 14-3-3-like protein GF14 chi OS=Arabidopsis thaliana OX=3702 GN=GRF1 PE=1 SV=3	32.4349	32.3775	32.4448	32.4993	32.3247	32.2982	32.3398	32.2944		2.42845	0.124852
0.00375334	1.24679	GLY3	sp|Q9C8L4|ETHE1_ARATH Persulfide dioxygenase ETHE1 homolog, mitochondrial OS=Arabidopsis thaliana OX=3702 GN=GLY3 PE=1 SV=3	28.7682	28.7983	28.7449	28.7195	28.5991	28.4873	28.3868	28.2849		2.42558	0.318217
0.00399561	0.840991	CPK21	sp|Q9ZSA2|CDPKL_ARATH Calcium-dependent protein kinase 21 OS=Arabidopsis thaliana OX=3702 GN=CPK21 PE=1 SV=1	26.3821	26.5072	26.3326	26.308	26.6399	26.704	26.5445	26.6409		2.39842	-0.249838
0.00400019	1.11692		sp|Q944P7|AMPL2_ARATH Leucine aminopeptidase 2, chloroplastic OS=Arabidopsis thaliana OX=3702 GN=LAP2 PE=2 SV=2	26.9614	26.9289	27.0272	26.8643	26.798	26.8056	26.7767	26.7633		2.39792	0.159524
0.00403644	1.18393	ANN1	sp|Q9SYT0|ANXD1_ARATH Annexin D1 OS=Arabidopsis thaliana OX=3702 GN=ANN1 PE=1 SV=1	32.4141	32.3834	32.4814	32.4136	32.1133	32.082	32.2964	32.2265		2.394	0.243589
0.00404961	0.94145	ATPA	sp|P92549|ATPAM_ARATH ATP synthase subunit alpha, mitochondrial OS=Arabidopsis thaliana OX=3702 GN=ATPA PE=1 SV=2	33.0078	33.0353	33.0292	32.9854	33.1294	33.0989	33.1188	33.0586		2.39259	-0.0870438
0.00417794	0.792063	PAP12	sp|Q38924|PPA12_ARATH Fe(3+)-Zn(2+) purple acid phosphatase 12 OS=Arabidopsis thaliana OX=3702 GN=PAP12 PE=2 SV=3	26.5583	26.3832	26.4918	26.6303	26.8853	26.7367	26.8023	26.9846		2.37904	-0.336312
0.00418934	1.21129	CXE12	sp|Q9SMN0|CXE12_ARATH Probable carboxylesterase 12 OS=Arabidopsis thaliana OX=3702 GN=CXE12 PE=1 SV=1	28.5223	28.6761	28.5711	28.4465	28.2144	28.2258	28.3834	28.2862		2.37785	0.27654
0.00436678	0.788816	NAGK	sp|Q9SCL7|NAGK_ARATH Acetylglutamate kinase, chloroplastic OS=Arabidopsis thaliana OX=3702 GN=NAGK PE=1 SV=1	26.5985	26.7089	26.448	26.6443	26.9801	26.9838	26.7841	27.0206		2.35984	-0.34224
0.00441759	1.14645		sp|Q9ZUG4|MTNA_ARATH Methylthioribose-1-phosphate isomerase OS=Arabidopsis thaliana OX=3702 GN=At2g05830 PE=1 SV=2	27.6431	27.6773	27.5172	27.5577	27.4619	27.3813	27.3467	27.4167		2.35481	0.197178
0.00449749	1.19955		sp|Q38798|CALX2_ARATH Calnexin homolog 2 OS=Arabidopsis thaliana OX=3702 GN=At5g07340 PE=2 SV=2	26.3594	26.4459	26.3959	26.5217	26.0393	26.1899	26.1729	26.2708		2.34703	0.262494
0.00458187	0.844386	RPS18A	sp|P34788|RS18_ARATH 40S ribosomal protein S18 OS=Arabidopsis thaliana OX=3702 GN=RPS18A PE=1 SV=1	32.5635	32.5076	32.4035	32.6049	32.8248	32.8067	32.672	32.7519		2.33896	-0.244026
0.00467067	1.17751	CID11	sp|Q9LPI5|CID11_ARATH Polyadenylate-binding protein-interacting protein 11 OS=Arabidopsis thaliana OX=3702 GN=CID11 PE=2 SV=1	26.6996	26.8001	26.6853	26.7049	26.6126	26.3851	26.4693	26.48		2.33062	0.235743
0.00472064	1.17178	CCT7	sp|Q9SF16|TCPH_ARATH T-complex protein 1 subunit eta OS=Arabidopsis thaliana OX=3702 GN=CCT7 PE=1 SV=1	29.4429	29.4519	29.392	29.4589	29.2387	29.166	29.0962	29.3301		2.326	0.228698
0.00486962	1.22443	VEP1	sp|Q9STX2|VEP1_ARATH 3-oxo-Delta(4,5)-steroid 5-beta-reductase OS=Arabidopsis thaliana OX=3702 GN=VEP1 PE=1 SV=1	28.5377	28.581	28.5966	28.5797	28.3546	28.2576	28.1066	28.4077		2.3125	0.292116
0.00488328	1.24533	MSBP1	sp|Q9XFM6|MSBP1_ARATH Membrane steroid-binding protein 1 OS=Arabidopsis thaliana OX=3702 GN=MSBP1 PE=1 SV=2	29.2622	29.0848	29.0904	29.1123	28.8553	28.8414	28.6528	28.9341		2.31129	0.316527
0.00505125	0.811985		sp|Q8GWI2|FBL69_ARATH F-box/LRR-repeat protein At3g60040 OS=Arabidopsis thaliana OX=3702 GN=At3g60040 PE=2 SV=1	26.7231	26.7103	26.8811	26.8791	27.2435	27.0991	27.0167	27.0362		2.2966	-0.300475
0.00512653	0.786463		sp|P43333|RU2A_ARATH U2 small nuclear ribonucleoprotein A OS=Arabidopsis thaliana OX=3702 GN=At1g09760 PE=2 SV=2	26.8247	27.1333	26.9232	27.0151	27.3099	27.4373	27.209	27.3263		2.29018	-0.34655
0.00515433	1.16879		sp|Q9T034|SYFA_ARATH Phenylalanine--tRNA ligase alpha subunit, cytoplasmic OS=Arabidopsis thaliana OX=3702 GN=At4g39280 PE=2 SV=3	26.917	26.886	26.8077	26.7954	26.6078	26.6433	26.5229	26.732		2.28783	0.225017
0.00516062	1.16422	PAPP5	sp|Q84XU2|PPP5_ARATH Serine/threonine-protein phosphatase 5 OS=Arabidopsis thaliana OX=3702 GN=PAPP5 PE=1 SV=1	27.4535	27.4956	27.3935	27.414	27.2627	27.2742	27.0823	27.26		2.2873	0.219364
0.00517013	1.2703	MTK	sp|Q9C6D2|MTK_ARATH Methylthioribose kinase OS=Arabidopsis thaliana OX=3702 GN=MTK PE=1 SV=1	26.8149	26.8381	26.9185	26.6975	26.531	26.5895	26.284	26.4839		2.2865	0.345172
0.00519817	1.27094	MS2	sp|Q9SRV5|METE2_ARATH 5-methyltetrahydropteroyltriglutamate--homocysteine methyltransferase 2 OS=Arabidopsis thaliana OX=3702 GN=MS2 PE=1 SV=1	31.7949	31.9115	31.8114	31.9622	31.4512	31.5376	31.3928	31.7146		2.28415	0.345901
0.00521283	1.23034	GSTF9	sp|O80852|GSTF9_ARATH Glutathione S-transferase F9 OS=Arabidopsis thaliana OX=3702 GN=GSTF9 PE=1 SV=1	32.5211	32.5627	32.3883	32.5505	32.2061	32.0585	32.2245	32.3373		2.28293	0.299054
0.00527161	0.831476	SAT3	sp|Q39218|SAT3_ARATH Serine acetyltransferase 3, mitochondrial OS=Arabidopsis thaliana OX=3702 GN=SAT3 PE=1 SV=3	26.5022	26.3523	26.4134	26.2706	26.6657	26.7406	26.5525	26.6446		2.27806	-0.266253
0.00527425	0.831733	IIL1	sp|Q94AR8|LEUC_ARATH 3-isopropylmalate dehydratase large subunit, chloroplastic OS=Arabidopsis thaliana OX=3702 GN=IIL1 PE=1 SV=1	29.5275	29.4105	29.3537	29.432	29.7968	29.692	29.5589	29.7392		2.27784	-0.265808
0.00531158	0.826708	CBF5	sp|Q9LD90|CBF5_ARATH H/ACA ribonucleoprotein complex subunit 4 OS=Arabidopsis thaliana OX=3702 GN=CBF5 PE=1 SV=1	28.3498	28.2379	28.4684	28.3527	28.6718	28.4955	28.658	28.6817		2.27478	-0.27455
0.00533127	0.800943	ABH1	sp|Q9SIU2|NCBP1_ARATH Nuclear cap-binding protein subunit 1 OS=Arabidopsis thaliana OX=3702 GN=ABH1 PE=1 SV=2	26.942	26.8461	26.6835	26.7773	27.1813	27.1692	26.9786	27.2008		2.27317	-0.320228
0.00541993	0.871059	OEP64	sp|Q9LVH5|OE64C_ARATH Outer envelope protein 64, chloroplastic OS=Arabidopsis thaliana OX=3702 GN=OEP64 PE=1 SV=1	25.5383	25.5927	25.5345	25.3882	25.6765	25.7066	25.758	25.7092		2.26601	-0.199157
0.00545118	0.788855	VHA-B2	sp|Q9SZN1|VATB2_ARATH V-type proton ATPase subunit B2 OS=Arabidopsis thaliana OX=3702 GN=VHA-B2 PE=1 SV=1	27.459	27.4901	27.3371	27.4445	27.976	27.7929	27.6726	27.6578		2.26351	-0.342167
0.00550376	1.26704	RTNLB5	sp|O82352|RTNLE_ARATH Reticulon-like protein B5 OS=Arabidopsis thaliana OX=3702 GN=RTNLB5 PE=1 SV=1	26.9473	26.9785	27.0327	27.1634	26.7924	26.7525	26.5	26.711		2.25934	0.341465
0.00551036	1.1216	GLYRS-1	sp|O23627|SYGM1_ARATH Glycine--tRNA ligase, mitochondrial 1 OS=Arabidopsis thaliana OX=3702 GN=At1g29880 PE=1 SV=1	28.4812	28.5168	28.4492	28.3899	28.3343	28.3143	28.2095	28.3166		2.25882	0.16556
0.0055177	1.16882		sp|Q9LV35|AIP12_ARATH Actin-interacting protein 1-2 OS=Arabidopsis thaliana OX=3702 GN=AIP1-2 PE=2 SV=1	28.4629	28.4698	28.4971	28.4254	28.3411	28.2849	28.1022	28.2267		2.25824	0.225057
0.00562071	1.24231	SLY1	sp|Q9SL48|SLY1_ARATH SEC1 family transport protein SLY1 OS=Arabidopsis thaliana OX=3702 GN=SLY1 PE=1 SV=1	27.9321	27.9646	27.8478	27.7717	27.6331	27.5466	27.4049	27.6794		2.25021	0.313023
0.00562141	1.23545	MFP2	sp|Q9ZPI5|MFP2_ARATH Peroxisomal fatty acid beta-oxidation multifunctional protein MFP2 OS=Arabidopsis thaliana OX=3702 GN=MFP2 PE=1 SV=1	29.9174	29.9779	29.8899	29.7155	29.633	29.6409	29.5626	29.444		2.25015	0.305034
0.00567782	1.22361	THY-1	sp|Q05762|DRTS1_ARATH Bifunctional dihydrofolate reductase-thymidylate synthase 1 OS=Arabidopsis thaliana OX=3702 GN=THY-1 PE=1 SV=2	25.9805	26.1725	26.1449	26.0057	25.7871	25.8252	25.6473	25.8795		2.24582	0.291139
0.00568095	0.858217	RH56;RH15	sp|Q56XG6|RH15_ARATH DEAD-box ATP-dependent RNA helicase 15 OS=Arabidopsis thaliana OX=3702 GN=RH15 PE=1 SV=3;sp|Q9LFN6|RH56_ARATH DEAD-box ATP-dependent RNA helicase 56 OS=Arabidopsis thaliana OX=3702 GN=RH56 PE=1 SV=2	29.1257	29.048	29.0518	29.1227	29.3381	29.3124	29.176	29.404		2.24558	-0.220586
0.00568158	1.10999	NIT3	sp|P46010|NRL3_ARATH Nitrilase 3 OS=Arabidopsis thaliana OX=3702 GN=NIT3 PE=1 SV=1	28.91	28.8961	28.9863	28.9173	28.7431	28.7146	28.8465	28.8034		2.24553	0.150546
0.00569462	1.22025	NAP1;2	2 OS=Arabidopsis thaliana OX=3702 GN=NAP1;2 PE=1 SV=1;sp|Q9ZUP3|NAP1B_ARATH Nucleosome assembly protein 1	28.8506	28.7919	28.7178	28.6991	28.5586	28.5265	28.3029	28.5228		2.24454	0.287175
0.00581187	1.23974	SQS1	sp|P53799|FDFT1_ARATH Squalene synthase 1 OS=Arabidopsis thaliana OX=3702 GN=SQS1 PE=1 SV=1	27.5157	27.3923	27.4188	27.5327	27.1464	27.1859	26.9852	27.3019		2.23568	0.310042
0.00587344	1.13097	DSK2A	sp|Q9SII9|DSK2A_ARATH Ubiquitin domain-containing protein DSK2a OS=Arabidopsis thaliana OX=3702 GN=DSK2A PE=1 SV=2	25.9868	26.0511	26.1577	26.0625	25.8854	25.8796	25.8333	25.9496		2.23111	0.177564
0.00592395	1.14481	PAD1	sp|P30186|PSA7A_ARATH Proteasome subunit alpha type-7-A OS=Arabidopsis thaliana OX=3702 GN=PAD1 PE=1 SV=1	29.8238	29.8775	29.8301	29.7767	29.5752	29.6047	29.5909	29.7569		2.22739	0.195103
0.00597968	0.867771	KEA2	sp|O65272|KEA2_ARATH K(+) efflux antiporter 2, chloroplastic OS=Arabidopsis thaliana OX=3702 GN=KEA2 PE=1 SV=2	26.7652	26.6734	26.8214	26.7596	26.9687	26.8811	26.926	27.0623		2.22332	-0.204614
0.00608974	0.840946	PKP1	sp|Q9LIK0|PKP1_ARATH Plastidial pyruvate kinase 1, chloroplastic OS=Arabidopsis thaliana OX=3702 GN=PKP1 PE=1 SV=1	28.8104	28.6778	28.7993	28.8407	28.9487	29.0476	28.9686	29.163		2.2154	-0.249915
0.00635559	1.15469	PBE1	sp|O23717|PSB5A_ARATH Proteasome subunit beta type-5-A OS=Arabidopsis thaliana OX=3702 GN=PBE1 PE=1 SV=1	28.8755	28.899	28.9593	28.8585	28.7883	28.6679	28.5755	28.7307		2.19684	0.20751
0.00638959	1.23588	UAH	sp|Q8VXY9|UAH_ARATH Ureidoglycolate hydrolase OS=Arabidopsis thaliana OX=3702 GN=UAH PE=1 SV=1	26.4467	26.2427	26.3464	26.383	26.1654	26.1198	25.8889	26.0225		2.19453	0.305533
0.00643245	1.20426	GDI2	sp|O24653|GDI2_ARATH Guanosine nucleotide diphosphate dissociation inhibitor 2 OS=Arabidopsis thaliana OX=3702 GN=GDI2 PE=2 SV=1	29.9964	29.9133	29.8782	30.0101	29.6745	29.728	29.5268	29.7963		2.19162	0.268147
0.00645011	1.12924	IVD	sp|Q9SWG0|IVD_ARATH Isovaleryl-CoA dehydrogenase, mitochondrial OS=Arabidopsis thaliana OX=3702 GN=IVD PE=1 SV=2	27.2912	27.3146	27.3431	27.3608	27.2702	27.1321	27.0962	27.1099		2.19043	0.175346
0.00650771	0.836255	GSH1	sp|P46309|GSH1_ARATH Glutamate--cysteine ligase, chloroplastic OS=Arabidopsis thaliana OX=3702 GN=GSH1 PE=1 SV=2	29.7688	29.7907	29.9776	29.7599	30.0342	30.1912	30.0592	30.0444		2.18657	-0.257985
0.00664104	1.14221	PDIL2-1	sp|O22263|PDI21_ARATH Protein disulfide-isomerase like 2-1 OS=Arabidopsis thaliana OX=3702 GN=PDIL2-1 PE=2 SV=1	30.9002	30.8501	30.9404	30.8702	30.6339	30.6891	30.6481	30.8224		2.17776	0.191825
0.00672386	1.16633	CPK3	sp|Q42479|CDPK3_ARATH Calcium-dependent protein kinase 3 OS=Arabidopsis thaliana OX=3702 GN=CPK3 PE=1 SV=1	28.437	28.4746	28.3096	28.3431	28.1677	28.1218	28.108	28.2789		2.17238	0.22198
0.00681758	1.1622	GRXS17	sp|Q9ZPH2|GRS17_ARATH Monothiol glutaredoxin-S17 OS=Arabidopsis thaliana OX=3702 GN=GRXS17 PE=1 SV=1	27.2427	27.2657	27.216	27.1011	27.0165	27.0874	26.9115	26.9427		2.16637	0.216859
0.00687897	1.18637		sp|Q9M081|SC24B_ARATH Protein transport protein Sec24-like At4g32640 OS=Arabidopsis thaliana OX=3702 GN=At4g32640 PE=3 SV=3	26.649	26.6338	26.6141	26.6251	26.5302	26.3906	26.2329	26.382		2.16248	0.246551
0.00694034	1.09607	PBA1	sp|Q8LD27|PSB6_ARATH Proteasome subunit beta type-6 OS=Arabidopsis thaliana OX=3702 GN=PBA1 PE=1 SV=2	29.1434	29.0406	29.0562	29.0179	28.9134	28.9003	28.932	28.983		2.15862	0.132337
0.0069585	0.868118	HSP70-9	sp|Q8GUM2|HSP7I_ARATH Heat shock 70 kDa protein 9, mitochondrial OS=Arabidopsis thaliana OX=3702 GN=HSP70-9 PE=1 SV=1	30.1731	30.0282	30.1366	30.1523	30.3768	30.3308	30.2147	30.384		2.15748	-0.204036
0.00700687	0.813469	TOC159	sp|O81283|TC159_ARATH Translocase of chloroplast 159, chloroplastic OS=Arabidopsis thaliana OX=3702 GN=TOC159 PE=1 SV=1	26.6477	26.8141	26.6036	26.6777	26.9487	26.9748	27.1453	26.8657		2.15448	-0.297841
0.00701186	1.12993	VALRS	sp|P93736|SYVM1_ARATH Valine--tRNA ligase, mitochondrial 1 OS=Arabidopsis thaliana OX=3702 GN=TWN2 PE=1 SV=2	28.0324	28.0215	27.986	27.933	27.877	27.887	27.7426	27.7614		2.15417	0.176234
0.00712386	1.17805	RPT1A	sp|Q9SSB5|PRS7A_ARATH 26S proteasome regulatory subunit 7 homolog A OS=Arabidopsis thaliana OX=3702 GN=RPT1A PE=1 SV=1	28.9349	28.8485	28.8287	28.8577	28.6836	28.642	28.4758	28.7228		2.14728	0.236404
0.00719735	0.898844	RIBA1	sp|P47924|RIBA1_ARATH Bifunctional riboflavin biosynthesis protein RIBA 1, chloroplastic OS=Arabidopsis thaliana OX=3702 GN=RIBA1 PE=1 SV=2	25.8612	25.9819	25.9949	25.9633	26.0687	26.1658	26.1169	26.0654		2.14283	-0.153858
0.00722786	0.885448	FTSH3	sp|Q84WU8|FTSH3_ARATH ATP-dependent zinc metalloprotease FTSH 3, mitochondrial OS=Arabidopsis thaliana OX=3702 GN=FTSH3 PE=1 SV=1	27.2244	27.2542	27.3815	27.2129	27.477	27.4002	27.4158	27.4822		2.14099	-0.17552
0.00740171	1.29962		sp|Q9LTV6|DECR2_ARATH Peroxisomal 2,4-dienoyl-CoA reductase [(3E)-enoyl-CoA-producing] OS=Arabidopsis thaliana OX=3702 GN=At3g12800 PE=2 SV=1	29.105	29.1436	29.2413	28.9169	28.8551	28.8165	28.6473	28.5756		2.13067	0.378092
0.00742816	1.19708	ACG9	sp|Q9LK23|G6PD5_ARATH Glucose-6-phosphate 1-dehydrogenase 5, cytoplasmic OS=Arabidopsis thaliana OX=3702 GN=G6PD5 PE=1 SV=1	27.8488	27.8538	27.9406	27.8321	27.7005	27.7217	27.471	27.544		2.12912	0.259517
0.00752575	1.13462	RPN7	sp|Q93Y35|PSMD6_ARATH 26S proteasome non-ATPase regulatory subunit 6 homolog OS=Arabidopsis thaliana OX=3702 GN=RPN7 PE=1 SV=1	29.4567	29.5342	29.4916	29.4995	29.3901	29.3249	29.1899	29.3482		2.12345	0.182211
0.00752728	1.30183	ACX1	sp|O65202|ACOX1_ARATH Peroxisomal acyl-coenzyme A oxidase 1 OS=Arabidopsis thaliana OX=3702 GN=ACX1 PE=1 SV=1	30.6112	30.7427	30.7092	30.3502	30.2103	30.3296	30.1917	30.1597		2.12336	0.380544
0.00758462	1.21713	CSN8	sp|P43255|CSN8_ARATH COP9 signalosome complex subunit 8 OS=Arabidopsis thaliana OX=3702 GN=CSN8 PE=1 SV=1	26.3045	26.2085	26.1282	26.2727	26.0638	25.9775	25.7767	25.9621		2.12007	0.28348
0.00764597	1.25666	CSY2	sp|Q9LXS6|CISY2_ARATH Citrate synthase 2, peroxisomal OS=Arabidopsis thaliana OX=3702 GN=CSY2 PE=2 SV=1	29.3973	29.5375	29.5727	29.3239	29.163	29.2819	29.048	29.0201		2.11657	0.329595
0.00765271	0.77908	RPS19C	sp|Q9FNP8|RS193_ARATH 40S ribosomal protein S19-3 OS=Arabidopsis thaliana OX=3702 GN=RPS19C PE=2 SV=1	29.9766	30.1601	29.9404	30.0048	30.3384	30.4329	30.1915	30.5597		2.11618	-0.360156
0.00771655	1.22741	CRT1	sp|O04151|CALR1_ARATH Calreticulin-1 OS=Arabidopsis thaliana OX=3702 GN=CRT1 PE=1 SV=1	30.195	30.21	30.1985	30.2194	29.8025	29.799	29.9203	30.1187		2.11258	0.295618
0.00772951	1.11709	DCD	sp|F4HYF3|DCYD1_ARATH Bifunctional D-cysteine desulfhydrase/1-aminocyclopropane-1-carboxylate deaminase, mitochondrial OS=Arabidopsis thaliana OX=3702 GN=DCD PE=1 SV=1	27.6833	27.6801	27.5928	27.5625	27.4943	27.4863	27.5081	27.391		2.11185	0.159741
0.00774503	1.15275	PHOS32	sp|Q8VYN9|PHO32_ARATH Universal stress protein PHOS32 OS=Arabidopsis thaliana OX=3702 GN=PHOS32 PE=1 SV=1	28.9896	29.1425	29.1246	28.9583	28.8434	28.7842	28.884	28.8831		2.11098	0.205078
0.00776345	0.77307		sp|Q9FGF0|PGML1_ARATH Phosphoglycerate mutase-like protein 1 OS=Arabidopsis thaliana OX=3702 GN=At5g64460 PE=2 SV=1	26.1495	25.8222	26.0839	26.0765	26.3733	26.5694	26.2749	26.3999		2.10995	-0.371329
0.00792397	1.10753	CYC12	sp|Q9FKS5|CYC1B_ARATH Cytochrome c1 2, heme protein, mitochondrial OS=Arabidopsis thaliana OX=3702 GN=CYC1-2 PE=1 SV=1	30.4943	30.4406	30.4557	30.3733	30.3226	30.2145	30.2954	30.3419		2.10106	0.14735
0.00797804	1.27975	UBC35	sp|Q94A97|UBC35_ARATH Ubiquitin-conjugating enzyme E2 35 OS=Arabidopsis thaliana OX=3702 GN=UBC35 PE=1 SV=1	26.8811	26.9933	26.9204	26.7793	26.5237	26.6505	26.3177	26.6588		2.0981	0.355857
0.00801994	1.17662	OXP1	sp|Q9FIZ7|OPLA_ARATH 5-oxoprolinase OS=Arabidopsis thaliana OX=3702 GN=OXP1 PE=1 SV=1	28.349	28.3286	28.2517	28.1058	28.0925	28.0217	27.9813	28.001		2.09583	0.234653
0.00809459	0.849303	RPL10C	sp|Q93W22|RL103_ARATH 60S ribosomal protein L10-3 OS=Arabidopsis thaliana OX=3702 GN=RPL10C PE=2 SV=1	31.0746	30.999	30.9426	31.1486	31.3547	31.2702	31.3164	31.1661		2.0918	-0.235648
0.00819429	1.21316	ACS	sp|B9DGD6|ACS_ARATH Acetyl-coenzyme A synthetase, chloroplastic/glyoxysomal OS=Arabidopsis thaliana OX=3702 GN=ACS PE=1 SV=1	28.4371	28.4038	28.3991	28.2929	28.2055	28.1764	27.9181	28.1178		2.08649	0.278769
0.00822985	1.18171	CCT6A	sp|Q9M888|TCPZA_ARATH T-complex protein 1 subunit zeta 1 OS=Arabidopsis thaliana OX=3702 GN=CCT6A PE=1 SV=1	29.7989	29.7589	29.7306	29.7916	29.6022	29.559	29.3514	29.6039		2.08461	0.240878
0.00834162	0.88718	SHM2	sp|Q94C74|GLYM2_ARATH Serine hydroxymethyltransferase 2, mitochondrial OS=Arabidopsis thaliana OX=3702 GN=SHM2 PE=1 SV=2	27.9474	27.8664	27.9485	27.955	28.0482	28.0253	28.1936	28.1409		2.07875	-0.172701
0.00834531	0.778666	PAE12	sp|Q9SFF6|PAE12_ARATH Pectin acetylesterase 12 OS=Arabidopsis thaliana OX=3702 GN=PAE12 PE=2 SV=1	26.0894	25.9748	25.9245	26.0656	26.3817	26.5942	26.3411	26.1809		2.07856	-0.360923
0.00844376	1.30731	ANN2	sp|Q9XEE2|ANXD2_ARATH Annexin D2 OS=Arabidopsis thaliana OX=3702 GN=ANN2 PE=1 SV=1	30.6223	30.5993	30.4415	30.6741	30.136	30.2239	30.0085	30.4224		2.07346	0.386599
0.00849953	0.787702	CR88	sp|Q9SIF2|HS905_ARATH Heat shock protein 90-5, chloroplastic OS=Arabidopsis thaliana OX=3702 GN=HSP90-5 PE=1 SV=1	28.9473	28.8589	28.8272	28.9915	29.113	29.1335	29.4607	29.2948		2.07061	-0.344278
0.00850709	0.800938		sp|Q9C8Z4|HEAT1_ARATH Uncharacterized protein At3g06530 OS=Arabidopsis thaliana OX=3702 GN=At3g06530 PE=1 SV=3	25.2382	25.2545	25.1637	25.3563	25.6212	25.69	25.359	25.6234		2.07022	-0.320237
0.00857706	1.23656	PANK2	sp|Q8L5Y9|PANK2_ARATH Pantothenate kinase 2 OS=Arabidopsis thaliana OX=3702 GN=PANK2 PE=1 SV=2	27.548	27.4953	27.3684	27.3957	27.1738	27.325	27.0588	27.0244		2.06666	0.306332
0.00866212	1.18055	RH8	sp|Q8RXK6|RH8_ARATH DEAD-box ATP-dependent RNA helicase 8 OS=Arabidopsis thaliana OX=3702 GN=RH8 PE=2 SV=1	27.7828	27.7539	27.6944	27.7977	27.5586	27.6139	27.3483	27.5501		2.06238	0.239461
0.00868211	0.835285	CFIS2	sp|Q8GXS3|CFIS2_ARATH Pre-mRNA cleavage factor Im 25 kDa subunit 2 OS=Arabidopsis thaliana OX=3702 GN=CFIS2 PE=1 SV=1	26.5387	26.8054	26.6091	26.6151	26.9729	26.8641	26.8179	26.952		2.06137	-0.25966
0.00869854	1.17785	FOLD2	sp|Q9LHH7|FOLD2_ARATH Bifunctional protein FolD 2 OS=Arabidopsis thaliana OX=3702 GN=FOLD2 PE=2 SV=1	28.8098	28.8081	28.7812	28.7901	28.4943	28.6704	28.422	28.6579		2.06055	0.236159
0.00870645	1.21283	At2g45540	sp|F4IG73|BCHC2_ARATH BEACH domain-containing protein C2 OS=Arabidopsis thaliana OX=3702 GN=BCHC2 PE=1 SV=1	26.4234	26.4261	26.2536	26.3884	26.2242	26.0882	25.9348	26.1308		2.06016	0.278377
0.00889619	0.81779	PHB6	sp|Q9SIL6|PHB6_ARATH Prohibitin-6, mitochondrial OS=Arabidopsis thaliana OX=3702 GN=PHB6 PE=1 SV=1	27.3671	27.4363	27.4178	27.5349	27.9141	27.7311	27.5953	27.6765		2.0508	-0.290198
0.00891008	1.29416	SDH	sp|Q9FJ95|DHSO_ARATH Sorbitol dehydrogenase OS=Arabidopsis thaliana OX=3702 GN=SDH PE=1 SV=1	28.1398	28.1848	28.1738	27.9497	27.9407	27.6479	27.7948	27.5767		2.05012	0.372018
0.00896585	1.1894		sp|Q9ZPI1|SYKC_ARATH Lysine--tRNA ligase, cytoplasmic OS=Arabidopsis thaliana OX=3702 GN=At3g11710 PE=1 SV=1	29.007	29.0033	28.9643	28.8676	28.7962	28.7251	28.5444	28.7757		2.04741	0.250231
0.00897137	1.29209	RTNLB1	sp|Q9SUR3|RTNLA_ARATH Reticulon-like protein B1 OS=Arabidopsis thaliana OX=3702 GN=RTNLB1 PE=1 SV=1	29.5773	29.496	29.5417	29.4702	29.3473	29.1616	28.895	29.2025		2.04714	0.369705
0.00899804	1.11349	CDC48A	sp|P54609|CD48A_ARATH Cell division control protein 48 homolog A OS=Arabidopsis thaliana OX=3702 GN=CDC48A PE=1 SV=1	30.6005	30.5826	30.5291	30.5707	30.331	30.3812	30.445	30.5053		2.04585	0.155092
0.00901825	1.22984	CYP98A3	sp|O22203|C98A3_ARATH Cytochrome P450 98A3 OS=Arabidopsis thaliana OX=3702 GN=CYP98A3 PE=1 SV=1	27.8216	27.8174	27.8801	27.85	27.5913	27.6193	27.3148	27.6499		2.04488	0.298467
0.00903308	1.17086		sp|Q9M9K1|PMG2_ARATH Probable 2,3-bisphosphoglycerate-independent phosphoglycerate mutase 2 OS=Arabidopsis thaliana OX=3702 GN=PGM2 PE=1 SV=1	30.8042	30.7259	30.8151	30.6261	30.4916	30.4295	30.6264	30.5134		2.04416	0.227571
0.00910523	1.25942	RABA2D	sp|Q9FIF9|RAA2D_ARATH Ras-related protein RABA2d OS=Arabidopsis thaliana OX=3702 GN=RABA2D PE=2 SV=1	26.2008	26.0889	26.0482	26.2286	25.7189	26.0347	25.7113	25.7705		2.04071	0.332765
0.00920422	1.28381	At4g35220	sp|Q94JT5|CYL2_ARATH Cyclase-like protein 2 OS=Arabidopsis thaliana OX=3702 GN=CYCLASE2 PE=2 SV=1	27.3864	27.5122	27.398	27.3747	27.2152	27.2109	26.9104	26.893		2.03601	0.360431
0.00930233	1.26194	DPE2	sp|Q8RXD9|DPE2_ARATH 4-alpha-glucanotransferase DPE2 OS=Arabidopsis thaliana OX=3702 GN=DPE2 PE=1 SV=1	27.4775	27.5107	27.4654	27.5751	27.0805	27.0039	27.396	27.2056		2.03141	0.335649
0.00933744	1.15797	MUR1	sp|P93031|GMD2_ARATH GDP-mannose 4,6 dehydratase 2 OS=Arabidopsis thaliana OX=3702 GN=MUR1 PE=1 SV=3	28.9929	29.0305	29.0756	29.0175	28.8625	28.8372	28.6632	28.9072		2.02977	0.211601
0.00935881	1.25292	PVA12	sp|Q9SHC8|VAP12_ARATH Vesicle-associated protein 1-2 OS=Arabidopsis thaliana OX=3702 GN=PVA12 PE=1 SV=1	28.605	28.5668	28.4833	28.5457	28.2737	28.3176	27.9797	28.3286		2.02878	0.325289
0.00937417	0.836881	CYP79F2;CYP79F1	sp|Q949U1|C79F1_ARATH Dihomomethionine N-hydroxylase OS=Arabidopsis thaliana OX=3702 GN=CYP79F1 PE=1 SV=1;sp|Q9FUY7|C79F2_ARATH Hexahomomethionine N-hydroxylase OS=Arabidopsis thaliana OX=3702 GN=CYP79F2 PE=1 SV=2	25.3049	25.2572	25.372	25.4042	25.5628	25.6353	25.4425	25.7253		2.02807	-0.256905
0.0094288	1.15844		sp|O82462|SYEC_ARATH Glutamate--tRNA ligase, cytoplasmic OS=Arabidopsis thaliana OX=3702 GN=At5g26710 PE=1 SV=1	28.2148	28.2871	28.2474	28.1949	28.0693	28.0203	27.8795	28.1263		2.02554	0.212189
0.00961594	1.16602	ASNAP2	sp|Q9SPE6|SNAA2_ARATH Alpha-soluble NSF attachment protein 2 OS=Arabidopsis thaliana OX=3702 GN=ASNAP2 PE=1 SV=1	28.0901	28.0449	27.967	28.1695	27.8118	27.8245	27.7814	27.9675		2.01701	0.22159
0.00965255	0.835142	SCPL26	sp|Q9ZQQ0|SCP26_ARATH Serine carboxypeptidase-like 26 OS=Arabidopsis thaliana OX=3702 GN=SCPL26 PE=2 SV=1	25.8186	25.8598	25.6305	25.8469	26.0947	26.0854	26.0995	25.916		2.01536	-0.259906
0.0098212	0.875755	SDH5	sp|Q9SX77|SDH5_ARATH Succinate dehydrogenase subunit 5, mitochondrial OS=Arabidopsis thaliana OX=3702 GN=SDH5 PE=1 SV=1	29.077	29.0352	29.122	29.0506	29.2928	29.3641	29.1355	29.2581		2.00784	-0.1914
0.00988442	1.20878	RD19A	sp|P43296|RD19A_ARATH Cysteine protease RD19A OS=Arabidopsis thaliana OX=3702 GN=RD19A PE=1 SV=1	28.6475	28.7192	28.5822	28.6111	28.3253	28.2067	28.4073	28.5265		2.00505	0.273553
0.00998874	1.29924	PXN	sp|O04200|PXN_ARATH Peroxisomal nicotinamide adenine dinucleotide carrier OS=Arabidopsis thaliana OX=3702 GN=PXN PE=1 SV=1	26.3056	26.3013	26.2723	25.9636	25.731	25.961	25.9075	25.7326		2.00049	0.377667
0.0100167	1.2308	PPOX1	sp|Q9LTX3|PPOX1_ARATH Pyridoxine/pyridoxamine 5-phosphate oxidase 1, chloroplastic OS=Arabidopsis thaliana OX=3702 GN=PPOX1 PE=1 SV=1	25.7961	25.7483	25.8355	25.5279	25.4709	25.3593	25.5261	25.353		1.99927	0.299602
0.010023	1.24572	RABD1	sp|Q9ZRE2|RABD1_ARATH Ras-related protein RABD1 OS=Arabidopsis thaliana OX=3702 GN=RABD1 PE=1 SV=1	27.29	27.3773	27.175	27.3549	26.9018	27.0852	26.8198	27.1225		1.999	0.316982
0.0100272	1.11797		sp|P48006|EF1D1_ARATH Elongation factor 1-delta 1 OS=Arabidopsis thaliana OX=3702 GN=At1g30230 PE=1 SV=2	31.6119	31.5743	31.5747	31.6409	31.5304	31.3497	31.3992	31.479		1.99882	0.160881
0.010034	0.840156	MED36A	sp|Q94AH9|FBRL2_ARATH rRNA 2-O-methyltransferase fibrillarin 2 OS=Arabidopsis thaliana OX=3702 GN=FIB2 PE=1 SV=2	29.59	29.4708	29.5208	29.6128	29.8509	29.6898	29.7152	29.9436		1.99853	-0.25127
0.0100608	1.16106	TMN7	sp|Q9LIC2|TMN7_ARATH Transmembrane 9 superfamily member 7 OS=Arabidopsis thaliana OX=3702 GN=TMN7 PE=2 SV=1	28.2043	28.1686	28.2531	28.3041	28.1011	28.0956	27.8924	27.9793		1.99737	0.21544
0.0101033	1.23767		sp|O82399|MDHX1_ARATH Malate dehydrogenase 1, peroxisomal OS=Arabidopsis thaliana OX=3702 GN=PMDH1 PE=1 SV=1	30.0921	30.2741	30.3222	30.128	29.7672	30.0381	29.9573	29.8233		1.99554	0.307624
0.0101152	1.26054		sp|Q9SK87|ADHL2_ARATH Alcohol dehydrogenase-like 2 OS=Arabidopsis thaliana OX=3702 GN=At1g22440 PE=2 SV=1	29.5342	29.6623	29.6647	29.3714	29.3534	29.2708	29.0817	29.1907		1.99503	0.334039
0.0102648	1.16793	JAL34	sp|O04310|JAL34_ARATH Jacalin-related lectin 34 OS=Arabidopsis thaliana OX=3702 GN=JAL34 PE=1 SV=1	31.2548	31.1967	31.1574	31.0512	31.0622	30.9327	30.9087	30.8608		1.98865	0.223953
0.0104763	1.3254		sp|Q9LFA3|MDAR1_ARATH Monodehydroascorbate reductase 1, peroxisomal OS=Arabidopsis thaliana OX=3702 GN=MDAR1 PE=1 SV=1	30.5503	30.6076	30.7041	30.2983	30.1821	30.1331	30.2738	29.9457		1.97979	0.406432
0.010583	0.909125	PYR4	sp|O04904|PYRC_ARATH Dihydroorotase, mitochondrial OS=Arabidopsis thaliana OX=3702 GN=PYR4 PE=1 SV=1	27.6424	27.6755	27.7677	27.7092	27.7726	27.8876	27.814	27.8704		1.97539	-0.137449
0.0106569	1.22883	UGT75D1	sp|O23406|U75D1_ARATH UDP-glycosyltransferase 75D1 OS=Arabidopsis thaliana OX=3702 GN=UGT75D1 PE=2 SV=2	27.9764	27.962	28.1993	27.8206	27.6457	27.6847	27.6857	27.7531		1.97237	0.297282
0.010793	1.19586	PEN2	sp|Q9LT75|PTN2A_ARATH Phosphatidylinositol 3,4,5-trisphosphate 3-phosphatase and protein-tyrosine-phosphatase PTEN2A OS=Arabidopsis thaliana OX=3702 GN=PTEN2A PE=1 SV=1	26.7574	26.8369	26.7292	26.6092	26.6126	26.4363	26.3618	26.4899		1.96686	0.258046
0.0108079	0.81712	TOM9-2	sp|Q9FNC9|TOM92_ARATH Mitochondrial import receptor subunit TOM9-2 OS=Arabidopsis thaliana OX=3702 GN=TOM9-2 PE=1 SV=3	28.3397	28.0996	28.3694	28.1605	28.65	28.4412	28.5513	28.4924		1.96626	-0.29138
0.0108243	1.08816	P5CSB	sp|P54888|P5CS2_ARATH Delta-1-pyrroline-5-carboxylate synthase B OS=Arabidopsis thaliana OX=3702 GN=P5CSB PE=2 SV=1	27.3644	27.3389	27.2236	27.2687	27.1922	27.1571	27.1661	27.1926		1.9656	0.121897
0.0108768	0.940481	CARB	sp|Q42601|CARB_ARATH Carbamoyl-phosphate synthase large chain, chloroplastic OS=Arabidopsis thaliana OX=3702 GN=CARB PE=1 SV=1	28.2002	28.1858	28.138	28.1075	28.2445	28.2267	28.2351	28.2794		1.9635	-0.0885296
0.0109175	1.23649	DCI1	sp|Q9FHR8|DCI1_ARATH Delta(3,5)-Delta(2,4)-dienoyl-CoA isomerase, peroxisomal OS=Arabidopsis thaliana OX=3702 GN=DCI1 PE=1 SV=1	27.1887	27.2662	27.2851	27.0558	26.8206	27.0716	26.9092	26.7694		1.96188	0.306254
0.0109318	1.11712		sp|Q39230|SYSC_ARATH Serine--tRNA ligase, cytoplasmic OS=Arabidopsis thaliana OX=3702 GN=At5g27470 PE=1 SV=1	28.4701	28.416	28.4404	28.417	28.2768	28.2778	28.1717	28.378		1.96131	0.159785
0.0109823	1.08315	RPN2A	sp|O48844|PSD1A_ARATH 26S proteasome non-ATPase regulatory subunit 1 homolog A OS=Arabidopsis thaliana OX=3702 GN=RPN2A PE=1 SV=1	29.0835	29.0812	29.0917	29.0057	28.959	28.881	28.9641	28.9972		1.95931	0.115237
0.0110766	1.15758	GDH2	sp|Q38946|DHE2_ARATH Glutamate dehydrogenase 2 OS=Arabidopsis thaliana OX=3702 GN=GDH2 PE=1 SV=1	31.2174	31.2486	31.4241	31.2183	30.9801	31.0999	31.1188	31.0652		1.95559	0.211109
0.0112437	0.86004		sp|O22769|NDUV2_ARATH NADH dehydrogenase [ubiquinone] flavoprotein 2, mitochondrial OS=Arabidopsis thaliana OX=3702 GN=At4g02580 PE=1 SV=3	29.4451	29.6374	29.452	29.4837	29.6672	29.8098	29.6425	29.7688		1.94909	-0.217525
0.01129	0.771333	LRR-RLK	sp|Q8GZ99|HPCA1_ARATH Leucine-rich repeat receptor protein kinase HPCA1 OS=Arabidopsis thaliana OX=3702 GN=HPCA1 PE=1 SV=1	25.3239	25.5579	25.5882	25.4423	25.8283	26.0955	25.7079	25.779		1.94731	-0.374574
0.0113188	1.13369	PTP1	sp|O82656|PTP1_ARATH Protein-tyrosine-phosphatase PTP1 OS=Arabidopsis thaliana OX=3702 GN=PTP1 PE=1 SV=1	27.5587	27.6669	27.5957	27.5261	27.5207	27.3929	27.3354	27.3743		1.9462	0.181031
0.0114173	1.24673	PDIL2-3	sp|O48773|PDI23_ARATH Protein disulfide-isomerase 2-3 OS=Arabidopsis thaliana OX=3702 GN=PDIL2-3 PE=2 SV=1	29.1796	29.3208	29.1526	29.1044	28.9088	28.8472	28.6829	29.0459		1.94244	0.318149
0.0114964	0.771858	IPMI1	sp|Q9LYT7|LEUD2_ARATH 3-isopropylmalate dehydratase small subunit 3 OS=Arabidopsis thaliana OX=3702 GN=SSU3 PE=1 SV=1	28.5476	28.5623	28.4196	28.7187	28.9645	28.9732	28.7019	29.103		1.93944	-0.373593
0.0115343	1.17445	HOL1	sp|Q0WP12|HOL1_ARATH Thiocyanate methyltransferase 1 OS=Arabidopsis thaliana OX=3702 GN=HOL1 PE=1 SV=2	30.1428	30.1685	30.0288	30.0205	29.7584	29.9027	29.9837	29.7879		1.93801	0.231986
0.0115618	0.925862		sp|Q42290|MPPB_ARATH Probable mitochondrial-processing peptidase subunit beta, mitochondrial OS=Arabidopsis thaliana OX=3702 GN=MPPbeta PE=1 SV=2	31.2443	31.3316	31.3083	31.3793	31.415	31.4664	31.4159	31.4108		1.93697	-0.111131
0.0116047	1.22482	ACG12	sp|Q9FJI5|G6PD6_ARATH Glucose-6-phosphate 1-dehydrogenase 6, cytoplasmic OS=Arabidopsis thaliana OX=3702 GN=G6PD6 PE=1 SV=1	28.8229	28.8509	28.8686	28.7139	28.6118	28.6819	28.3843	28.4081		1.93537	0.292566
0.0116116	1.14504	At1g06560	sp|Q84MA1|NOP2C_ARATH rRNA (cytosine-C(5))-methyltransferase NOP2C OS=Arabidopsis thaliana OX=3702 GN=NOP2C PE=2 SV=1	24.8259	24.8697	25.0086	24.8706	24.7747	24.7268	24.5977	24.6941		1.93511	0.195392
0.0116337	1.15055	ACX3	sp|P0CZ23|ACOX3_ARATH Acyl-coenzyme A oxidase 3, peroxisomal OS=Arabidopsis thaliana OX=3702 GN=ACX3 PE=1 SV=1	27.8017	27.8284	27.8242	27.7527	27.502	27.7395	27.5298	27.6264		1.93428	0.202321
0.0116565	1.22772	ACX4	sp|Q96329|ACOX4_ARATH Acyl-coenzyme A oxidase 4, peroxisomal OS=Arabidopsis thaliana OX=3702 GN=ACX4 PE=1 SV=1	29.0305	29.1552	29.0136	28.8591	28.6862	28.8847	28.665	28.6388		1.93343	0.295981
0.0117681	1.17452	PDIL1-2	sp|Q9SRG3|PDI12_ARATH Protein disulfide isomerase-like 1-2 OS=Arabidopsis thaliana OX=3702 GN=PDIL1-2 PE=2 SV=1	29.1135	29.106	29.2063	28.944	28.9428	28.8789	28.8476	28.7723		1.92929	0.232067
0.0117906	1.33758		sp|Q94C12|NDBAB_ARATH NADH dehydrogenase [ubiquinone] 1 beta subcomplex subunit 10-B OS=Arabidopsis thaliana OX=3702 GN=At3g18410 PE=3 SV=1	28.4662	28.4918	28.8552	28.7215	28.0736	28.3877	28.1251	28.2698		1.92846	0.419629
0.01181	1.19694		sp|O23034|UBA5_ARATH Ubiquitin-like modifier-activating enzyme 5 OS=Arabidopsis thaliana OX=3702 GN=At1g05350 PE=3 SV=2	27.309	27.3048	27.2696	27.2032	27.0468	27.0918	26.81	27.1006		1.92775	0.259356
0.0118231	0.817977		sp|Q0WRW8|B561K_ARATH Cytochrome b561 and DOMON domain-containing protein At3g07570 OS=Arabidopsis thaliana OX=3702 GN=At3g07570 PE=2 SV=1	25.1464	25.3085	25.3406	25.245	25.3969	25.7316	25.5207	25.5507		1.92727	-0.289868
0.011844	0.825971	MEFG2	sp|F4IW10|EFGM2_ARATH Elongation factor G-2, mitochondrial OS=Arabidopsis thaliana OX=3702 GN=MEFG2 PE=1 SV=1	26.8019	26.6759	26.8442	26.8327	27.0787	27.1263	26.8733	27.1798		1.9265	-0.275837
0.0118477	1.23651	ACX2	sp|O65201|ACOX2_ARATH Acyl-coenzyme A oxidase 2, peroxisomal OS=Arabidopsis thaliana OX=3702 GN=ACX2 PE=1 SV=2	27.439	27.5896	27.5811	27.2989	27.2673	27.2288	27.1542	27.0333		1.92636	0.30627
0.0120041	0.89859	PATL3	sp|Q56Z59|PATL3_ARATH Patellin-3 OS=Arabidopsis thaliana OX=3702 GN=PATL3 PE=1 SV=2	27.808	27.7533	27.8288	27.8003	28.0148	27.912	27.8574	28.0232		1.92067	-0.154264
0.0121881	1.17103		sp|Q9SGC1|PGMC2_ARATH Probable phosphoglucomutase, cytoplasmic 2 OS=Arabidopsis thaliana OX=3702 GN=At1g70730 PE=1 SV=1	29.1151	29.2622	29.185	28.9782	28.8644	28.9124	28.9674	28.8852		1.91406	0.227775
0.0123198	1.15812	PGIC	sp|P34795|G6PI_ARATH Glucose-6-phosphate isomerase, cytosolic OS=Arabidopsis thaliana OX=3702 GN=PGIC PE=1 SV=1;sp|Q9FXM4|G6PI_;sp|Q9FXM5|G6PI_ARAHG Glucose-6-phosphate isomerase, cytosolic OS=Arabidopsis halleri subsp. gemmifera OX=63677 GN=PGIC PE=3 SV=2	30.3606	30.5418	30.5436	30.3439	30.2335	30.1974	30.3029	30.2089		1.9094	0.211787
0.01248	0.883252	DAPB1	sp|O80574|DAPB1_ARATH 4-hydroxy-tetrahydrodipicolinate reductase 1, chloroplastic OS=Arabidopsis thaliana OX=3702 GN=DAPB1 PE=1 SV=2	27.1786	27.1917	27.0431	27.2483	27.4208	27.317	27.3031	27.3372		1.90378	-0.179103
0.0125412	0.812079	RPL23AB;RPL23AA	sp|Q8LD46|R23A1_ARATH 60S ribosomal protein L23a-1 OS=Arabidopsis thaliana OX=3702 GN=RPL23AA PE=2 SV=2;sp|Q9M3C3|R23A2_ARATH 60S ribosomal protein L23a-2 OS=Arabidopsis thaliana OX=3702 GN=RPL23AB PE=2 SV=1	31.8191	31.6687	31.7871	31.8995	32.0435	32.0545	32.2997	31.9779		1.90166	-0.300307
0.0126271	1.16904	THFS	sp|Q9SPK5|FTHS_ARATH Formate--tetrahydrofolate ligase OS=Arabidopsis thaliana OX=3702 GN=THFS PE=2 SV=1	29.1721	29.3101	29.2609	29.1536	29.0859	29.0257	29.0372	28.8466		1.8987	0.225318
0.0126932	1.19221	MTHFR2	sp|O80585|MTHR2_ARATH Methylenetetrahydrofolate reductase 2 OS=Arabidopsis thaliana OX=3702 GN=MTHFR2 PE=1 SV=2	28.646	28.7312	28.585	28.7838	28.3873	28.3944	28.3479	28.6018		1.89643	0.253643
0.0127201	1.19526	SFGH	sp|Q8LAS8|SFGH_ARATH S-formylglutathione hydrolase OS=Arabidopsis thaliana OX=3702 GN=SFGH PE=1 SV=2	29.5645	29.649	29.5404	29.4389	29.384	29.4025	29.1958	29.1812		1.89551	0.25733
0.0129687	1.14434	SYP32	sp|Q9LK09|SYP32_ARATH Syntaxin-32 OS=Arabidopsis thaliana OX=3702 GN=SYP32 PE=2 SV=1	25.9738	26.0619	25.8664	26.0097	25.8875	25.7566	25.7116	25.7781		1.8871	0.194513
0.0129937	1.13441	T8K14.3	sp|Q9SAJ4|PGKY3_ARATH Phosphoglycerate kinase 3, cytosolic OS=Arabidopsis thaliana OX=3702 GN=PGK3 PE=1 SV=1	31.6287	31.805	31.8431	31.7323	31.5475	31.521	31.6201	31.5925		1.88627	0.181939
0.0129988	1.24961	PP2A3	sp|P48578|PP2A4_ARATH Serine/threonine-protein phosphatase PP2A-4 catalytic subunit OS=Arabidopsis thaliana OX=3702 GN=PP2A4 PE=1 SV=1	28.668	28.7233	28.818	28.9127	28.4033	28.3554	28.3964	28.681		1.8861	0.321484
0.0130532	0.824725	NUA	sp|A4GSN8|NUA_ARATH Nuclear-pore anchor OS=Arabidopsis thaliana OX=3702 GN=NUA PE=1 SV=1	25.8743	25.7794	25.9251	25.8658	26.2672	26.2447	25.9498	26.0949		1.88428	-0.278015
0.0131096	1.15206	VLN2	sp|O81644|VILI2_ARATH Villin-2 OS=Arabidopsis thaliana OX=3702 GN=VLN2 PE=1 SV=2	27.9252	27.8064	27.7867	27.9492	27.6954	27.6529	27.5522	27.7501		1.88241	0.204217
0.0131657	1.34734	K21L19.6	sp|Q9FGT8|TIL_ARATH Temperature-induced lipocalin-1 OS=Arabidopsis thaliana OX=3702 GN=TIL PE=1 SV=1	28.3993	28.4033	28.4851	28.1488	28.0436	27.8583	28.1315	27.6827		1.88056	0.430109
0.0132854	1.21611	SPP2	sp|Q9SJ66|SPP2_ARATH Probable sucrose-phosphatase 2 OS=Arabidopsis thaliana OX=3702 GN=SPP2 PE=2 SV=2	27.2815	27.368	27.4738	27.2796	27.1385	26.9098	27.2129	27.0128		1.87663	0.28227
0.0134001	1.24454		sp|P57758|CTNS_ARATH Cystinosin homolog OS=Arabidopsis thaliana OX=3702 GN=At5g40670 PE=2 SV=1	26.3129	26.1651	26.3598	26.0794	25.7893	26.0074	25.8189	26.0392		1.87289	0.315612
0.0134319	0.76792		sp|O64644|SAP18_ARATH Histone deacetylase complex subunit SAP18 OS=Arabidopsis thaliana OX=3702 GN=At2g45640 PE=1 SV=1	26.3369	26.3466	26.0571	26.1596	26.5936	26.5149	26.8471	26.4684		1.87186	-0.380972
0.0134842	0.900481	VAT1	sp|Q9FFF4|ILVH1_ARATH Acetolactate synthase small subunit 1, chloroplastic OS=Arabidopsis thaliana OX=3702 GN=VAT1 PE=1 SV=1	26.492	26.4825	26.4569	26.6023	26.6476	26.7175	26.582	26.6915		1.87018	-0.151232
0.0135268	0.750533	RPS23B;RPS23A	sp|P49201|RS232_ARATH 40S ribosomal protein S23-2 OS=Arabidopsis thaliana OX=3702 GN=RPS23B PE=2 SV=2;sp|Q9SF35|RS231_ARATH 40S ribosomal protein S23-1 OS=Arabidopsis thaliana OX=3702 GN=RPS23A PE=2 SV=2	31.4283	31.1765	31.3915	31.6462	31.8545	31.6297	31.8413	31.973		1.8688	-0.414012
0.0135623	0.740352	RBG3	sp|Q9FNR1|RBG3_ARATH Glycine-rich RNA-binding protein 3, mitochondrial OS=Arabidopsis thaliana OX=3702 GN=RBG3 PE=1 SV=1	27.3495	26.8114	27.0169	27.1319	27.4912	27.4712	27.4108	27.6714		1.86767	-0.433717
0.0135698	1.21331	SEC31B	sp|Q8L611|SC31B_ARATH Protein transport protein SEC31 homolog B OS=Arabidopsis thaliana OX=3702 GN=SEC31B PE=1 SV=1	29.5382	29.4171	29.4735	29.5292	29.2789	29.2504	28.988	29.3248		1.86743	0.278944
0.0136549	1.30648		sp|Q9LMC9|GLT2_ARATH Germin-like protein subfamily T member 2 OS=Arabidopsis thaliana OX=3702 GN=At1g18980 PE=2 SV=1	29.1713	29.4872	29.2938	29.3846	29.0345	29.1233	28.7086	28.9278		1.86471	0.385684
0.013693	0.801176	RPS7	sp|P92557|RT07_ARATH Ribosomal protein S7, mitochondrial OS=Arabidopsis thaliana OX=3702 GN=RPS7 PE=1 SV=1	26.1985	26.0516	26.0748	26.1408	26.4837	26.3927	26.227	26.6415		1.8635	-0.319808
0.0138453	1.22236	F5M6.9	sp|Q9C6T1|PMK_ARATH Phosphomevalonate kinase, peroxisomal OS=Arabidopsis thaliana OX=3702 GN=PMK PE=1 SV=1	27.7703	27.98	27.8843	27.9681	27.6717	27.4204	27.7417	27.6103		1.8587	0.28967
0.0140378	1.22648	CCT1	sp|Q9ZV56|CCT1_ARATH Choline-phosphate cytidylyltransferase 1 OS=Arabidopsis thaliana OX=3702 GN=CCT1 PE=1 SV=1	26.6906	26.559	26.6041	26.4961	26.3584	26.3439	26.069	26.4005		1.8527	0.294526
0.0141738	0.917948	ASN2	sp|Q9LV77|ASNS2_ARATH Asparagine synthetase [glutamine-hydrolyzing] 2 OS=Arabidopsis thaliana OX=3702 GN=ASN2 PE=2 SV=1	27.0238	26.9657	26.9235	26.9557	27.1055	27.0884	27.1556	27.0133		1.84852	-0.123516
0.0142151	0.753045		sp|Q38953|DEAH5_ARATH Probable pre-mRNA-splicing factor ATP-dependent RNA helicase DEAH5 OS=Arabidopsis thaliana OX=3702 GN=At3g26560 PE=1 SV=2	24.7297	24.7792	24.8201	24.9641	25.1262	25.4616	24.9835	25.3585		1.84725	-0.409193
0.0142157	1.32428	FDH1	sp|Q9S7E4|FDH_ARATH Formate dehydrogenase, chloroplastic/mitochondrial OS=Arabidopsis thaliana OX=3702 GN=FDH1 PE=1 SV=1	28.2973	28.5665	28.7224	28.3469	28.1951	28.1754	28.0231	27.9187		1.84723	0.405213
0.0142663	0.732588	SR34	sp|O22315|SR34_ARATH Serine/arginine-rich-splicing factor SR34 OS=Arabidopsis thaliana OX=3702 GN=SR34 PE=1 SV=1	26.4692	25.9587	26.234	26.3529	26.843	26.723	26.4981	26.7464		1.84569	-0.448926
0.0143023	1.25006	PER32	sp|Q9LHB9|PER32_ARATH Peroxidase 32 OS=Arabidopsis thaliana OX=3702 GN=PER32 PE=1 SV=3	33.2728	33.1958	33.0581	33.2128	32.9314	32.9737	32.6164	32.9302		1.8446	0.322001
0.0143248	0.755402	HIR4	sp|Q9FHM7|HIR4_ARATH Hypersensitive-induced response protein 4 OS=Arabidopsis thaliana OX=3702 GN=HIR4 PE=1 SV=1	26.5373	26.6363	26.8616	26.4686	27.2683	27.0085	26.9393	26.9063		1.84391	-0.404684
0.0143511	1.22224	ECA1	sp|P92939|ECA1_ARATH Calcium-transporting ATPase 1, endoplasmic reticulum-type OS=Arabidopsis thaliana OX=3702 GN=ECA1 PE=1 SV=2	28.1378	28.1166	28.0534	28.0528	27.9004	27.8451	27.5574	27.8996		1.84311	0.289525
0.0143551	1.24821	PRA1B1	sp|Q9LYN0|PR1B1_ARATH PRA1 family protein B1 OS=Arabidopsis thaliana OX=3702 GN=PRA1B1 PE=1 SV=1	27.0503	27.1789	26.9075	26.9467	26.7264	26.6521	26.5422	26.8833		1.84299	0.319857
0.0143718	0.797349	PAP2	sp|O49629|PAP2_ARATH Probable plastid-lipid-associated protein 2, chloroplastic OS=Arabidopsis thaliana OX=3702 GN=PAP2 PE=1 SV=1	27.1585	27.1508	27.019	27.006	27.3107	27.2772	27.6596	27.3938		1.84249	-0.326716
0.0144061	1.26363	ADF2	sp|Q39251|ADF2_ARATH Actin-depolymerizing factor 2 OS=Arabidopsis thaliana OX=3702 GN=ADF2 PE=1 SV=1	26.8192	26.6675	26.9197	26.7528	26.3198	26.4582	26.6862	26.3447		1.84145	0.337574
0.0144311	1.10805	GLYR1	sp|Q9LSV0|GLYR1_ARATH Glyoxylate/succinic semialdehyde reductase 1 OS=Arabidopsis thaliana OX=3702 GN=GLYR1 PE=1 SV=1	28.6823	28.7499	28.7411	28.6868	28.4496	28.5974	28.5962	28.625		1.8407	0.148018
0.0144563	1.30673	ORP3C	sp|Q93Y40|ORP3C_ARATH Oxysterol-binding protein-related protein 3C OS=Arabidopsis thaliana OX=3702 GN=ORP3C PE=2 SV=1	27.4349	27.6198	27.5788	27.3271	27.3002	27.1863	27.0554	26.8749		1.83994	0.385962
0.0145324	1.2895	DHS	sp|Q9FI94|DHYS_ARATH Deoxyhypusine synthase OS=Arabidopsis thaliana OX=3702 GN=DHS PE=2 SV=1	25.3555	25.1635	25.2893	24.9662	24.7858	24.6618	24.9005	24.9592		1.83766	0.366815
0.0146199	0.76013	GRXS16	sp|Q8H7F6|GRS16_ARATH Bifunctional monothiol glutaredoxin-S16, chloroplastic OS=Arabidopsis thaliana OX=3702 GN=GRXS16 PE=1 SV=2	25.9329	25.8584	26.1098	25.7493	26.137	26.2329	26.5517	26.3116		1.83506	-0.395682
0.0146555	0.825074	APS1	sp|Q9LIK9|APS1_ARATH ATP sulfurylase 1, chloroplastic OS=Arabidopsis thaliana OX=3702 GN=APS1 PE=1 SV=1	28.8485	28.8631	28.6053	28.8212	28.9713	29.0688	28.9923	29.2152		1.834	-0.277405
0.0147353	0.877332	SGR6	sp|F4IP13|SHGR6_ARATH Protein SHOOT GRAVITROPISM 6 OS=Arabidopsis thaliana OX=3702 GN=SGR6 PE=2 SV=1	25.3034	25.2545	25.482	25.3805	25.4986	25.6003	25.5032	25.5735		1.83164	-0.188805
0.0147573	1.19697	TMN3	sp|Q9ZPS7|TMN3_ARATH Transmembrane 9 superfamily member 3 OS=Arabidopsis thaliana OX=3702 GN=TMN3 PE=2 SV=1	27.0653	26.9556	27.1753	27.1447	26.9475	26.7149	26.7356	26.9054		1.83099	0.259388
0.014802	1.19186	SYT1	sp|Q9SKR2|SYT1_ARATH Synaptotagmin-1 OS=Arabidopsis thaliana OX=3702 GN=SYT1 PE=1 SV=2	28.0961	28.1027	28.0069	28.0367	27.9329	27.8283	27.6041	27.8643		1.82968	0.253215
0.0148218	0.813829	AHA2	sp|P19456|PMA2_ARATH ATPase 2, plasma membrane-type OS=Arabidopsis thaliana OX=3702 GN=AHA2 PE=1 SV=2	31.3698	31.3429	31.4487	31.1226	31.6935	31.6332	31.683	31.4631		1.8291	-0.297202
0.0148313	1.23702	BGLU42	sp|Q9FIW4|BGL42_ARATH Beta-glucosidase 42 OS=Arabidopsis thaliana OX=3702 GN=BGLU42 PE=2 SV=1	26.4197	26.6808	26.6039	26.5975	26.2215	26.3981	26.0863	26.3684		1.82882	0.306873
0.0148935	0.849109	WIN1	sp|Q9M8M7|ARGD_ARATH Acetylornithine aminotransferase, chloroplastic/mitochondrial OS=Arabidopsis thaliana OX=3702 GN=WIN1 PE=1 SV=1	27.5196	27.511	27.5023	27.2814	27.6614	27.7054	27.79	27.6014		1.827	-0.235979
0.0148977	1.19279	4CL2	sp|Q9S725|4CL2_ARATH 4-coumarate--CoA ligase 2 OS=Arabidopsis thaliana OX=3702 GN=4CL2 PE=1 SV=2	27.2772	27.3969	27.3352	27.4926	27.2096	27.0867	26.9674	27.2208		1.82688	0.254336
0.0151623	1.19472	CYS6	sp|Q8H0X6|CYT6_ARATH Cysteine proteinase inhibitor 6 OS=Arabidopsis thaliana OX=3702 GN=CYS6 PE=1 SV=2	29.3197	29.3817	29.4468	29.235	28.9141	29.1659	29.1834	29.093		1.81924	0.256675
0.0152294	1.21307	UBC30	sp|Q9FKT3|UBC30_ARATH Ubiquitin-conjugating enzyme E2 30 OS=Arabidopsis thaliana OX=3702 GN=UBC30 PE=1 SV=1	27.2332	27.2278	27.293	27.409	27.0148	27.0232	26.8305	27.18		1.81732	0.278666
0.0152792	0.746623	SCPL34	sp|Q0WPR4|SCP34_ARATH Serine carboxypeptidase-like 34 OS=Arabidopsis thaliana OX=3702 GN=SCPL34 PE=2 SV=2	25.6004	25.4153	25.5281	25.8567	25.97	26.082	25.8203	26.2144		1.8159	-0.421548
0.0154678	1.24374	AAO2	sp|Q7G192|ALDO2_ARATH Indole-3-acetaldehyde oxidase OS=Arabidopsis thaliana OX=3702 GN=AAO2 PE=1 SV=2	26.2291	26.2827	26.0571	25.9275	25.85	25.8415	25.8765	25.6697		1.81057	0.314689
0.0154949	1.19639	EIN2	sp|Q9S814|EIN2_ARATH Ethylene-insensitive protein 2 OS=Arabidopsis thaliana OX=3702 GN=EIN2 PE=1 SV=1	26.2481	26.4245	26.2448	26.1643	26.0491	26.131	25.8714	25.9954		1.80981	0.258692
0.0158594	0.746619	UQI3	sp|Q9FF98|ML3_ARATH MD-2-related lipid-recognition protein 3 OS=Arabidopsis thaliana OX=3702 GN=ML3 PE=1 SV=1	28.4873	28.5118	28.3522	28.7708	28.9825	28.765	29.1926	28.8682		1.79971	-0.421556
0.0159742	0.789873	VPS52	sp|Q94KD3|VP52A_ARATH Vacuolar protein sorting-associated protein 52 A OS=Arabidopsis thaliana OX=3702 GN=VPS52 PE=1 SV=1	25.4347	25.7423	25.5595	25.4307	25.8746	25.7918	25.775	26.0869		1.79658	-0.340307
0.016011	1.28505	P4H4	sp|Q8LAN3|P4H4_ARATH Probable prolyl 4-hydroxylase 4 OS=Arabidopsis thaliana OX=3702 GN=P4H4 PE=2 SV=1	26.6773	26.877	26.4485	26.6925	26.3356	26.3761	26.1239	26.4124		1.79558	0.361821
0.0160547	0.852261	TS1	sp|Q9S7B5|THRC1_ARATH Threonine synthase 1, chloroplastic OS=Arabidopsis thaliana OX=3702 GN=TS1 PE=1 SV=1	28.6589	28.7129	28.6072	28.8126	28.8661	28.8734	28.8847	29.0899		1.7944	-0.230633
0.0161118	1.24382	UGT85A2	sp|Q9ZWJ3|U85A2_ARATH UDP-glycosyltransferase 85A2 OS=Arabidopsis thaliana OX=3702 GN=UGT85A2 PE=2 SV=1	28.8116	28.8944	28.8989	28.5712	28.5086	28.5552	28.3148	28.5383		1.79286	0.314777
0.0161667	0.7547	PAE7	sp|Q940J8|PAE7_ARATH Pectin acetylesterase 7 OS=Arabidopsis thaliana OX=3702 GN=PAE7 PE=2 SV=1	28.6049	28.6197	28.6124	28.8023	28.9551	29.1727	28.8133	29.3223		1.79138	-0.406025
0.0162389	0.789317		sp|O22969|Y2416_ARATH Uncharacterized protein At2g34160 OS=Arabidopsis thaliana OX=3702 GN=At2g34160 PE=1 SV=1	27.9964	27.7918	27.6197	27.9488	28.2046	28.0734	28.11	28.334		1.78944	-0.341323
0.0163898	1.14902	XK-2	sp|Q949W8|XK2_ARATH Xylulose kinase 2 OS=Arabidopsis thaliana OX=3702 GN=XK2 PE=1 SV=1	31.2015	31.1382	31.0792	31.1282	30.927	31.0517	30.7895	30.9773		1.78543	0.200399
0.0166132	1.15539	VTC4	sp|Q9M8S8|VTC4_ARATH Inositol-phosphate phosphatase OS=Arabidopsis thaliana OX=3702 GN=VTC4 PE=1 SV=1	27.2961	27.3431	27.1978	27.3507	27.0198	27.0274	27.0629	27.244		1.77955	0.208385
0.0166316	0.869643	ACBP4	sp|Q9MA55|ACBP4_ARATH Acyl-CoA-binding domain-containing protein 4 OS=Arabidopsis thaliana OX=3702 GN=ACBP4 PE=1 SV=1	27.3017	27.2639	27.2932	27.2265	27.3624	27.6316	27.4099	27.4875		1.77907	-0.201505
0.0166465	1.27242	At4g34660	sp|Q8VWF1|SH3P2_ARATH SH3 domain-containing protein 2 OS=Arabidopsis thaliana OX=3702 GN=SH3P2 PE=1 SV=1	26.5584	26.6006	26.5486	26.3928	26.1372	26.2491	25.9361	26.3877		1.77868	0.347571
0.0166504	0.800354	ZFWD2	sp|Q9FNZ1|C3H63_ARATH Zinc finger CCCH domain-containing protein 63 OS=Arabidopsis thaliana OX=3702 GN=ZFWD2 PE=2 SV=1	25.1689	25.1493	24.9351	25.1127	25.4942	25.19	25.3996	25.5673		1.77858	-0.32129
0.0168623	0.870802	CGS1	sp|P55217|CGS1_ARATH Cystathionine gamma-synthase 1, chloroplastic OS=Arabidopsis thaliana OX=3702 GN=CGS1 PE=1 SV=3	27.5851	27.464	27.4962	27.3202	27.62	27.7162	27.7055	27.6221		1.77308	-0.199583
0.0168638	1.13927	At1g01910	sp|Q949M9|GET3A_ARATH ATPase GET3A OS=Arabidopsis thaliana OX=3702 GN=GET3A PE=1 SV=1	27.413	27.4293	27.3738	27.3106	27.1923	27.2925	27.0536	27.2357		1.77304	0.188114
0.0169003	1.13581	TPP2	sp|F4JVN6|TPPII_ARATH Tripeptidyl-peptidase 2 OS=Arabidopsis thaliana OX=3702 GN=TPP2 PE=1 SV=1	28.9545	28.9913	29.0132	28.8859	28.7972	28.9019	28.6724	28.7386		1.77211	0.18372
0.0169486	1.06946	RPT5A	sp|Q9SEI2|PS6AA_ARATH 26S proteasome regulatory subunit 6A homolog A OS=Arabidopsis thaliana OX=3702 GN=RPT5A PE=1 SV=1	29.1807	29.2383	29.2333	29.1182	29.1146	29.0702	29.1044	29.0937		1.77087	0.0968833
0.0169652	1.10805		sp|O82264|NPL42_ARATH NPL4-like protein 2 OS=Arabidopsis thaliana OX=3702 GN=At2g47970 PE=1 SV=1	27.245	27.3605	27.2832	27.2832	27.0568	27.1923	27.1077	27.223		1.77044	0.148026
0.016997	1.13752		sp|Q9M9P3|UGPA2_ARATH UTP--glucose-1-phosphate uridylyltransferase 2 OS=Arabidopsis thaliana OX=3702 GN=UGP2 PE=1 SV=1	30.5794	30.5361	30.4481	30.5989	30.3082	30.3851	30.2578	30.4677		1.76963	0.185887
0.0171218	1.18845	ECR	sp|Q9M2U2|TECR_ARATH Very-long-chain enoyl-CoA reductase OS=Arabidopsis thaliana OX=3702 GN=ECR PE=1 SV=1	28.0108	27.9006	27.653	27.8442	27.6363	27.5685	27.5923	27.6152		1.76645	0.249084
0.017237	1.15263		sp|F4J738|SAD2H_ARATH Importin beta-like SAD2 homolog OS=Arabidopsis thaliana OX=3702 GN=At3g59020 PE=1 SV=1	28.4363	28.316	28.4197	28.4026	28.1764	28.2023	28.0495	28.3268		1.76354	0.20493
0.0172746	0.765224	UGT74C1	sp|Q9SKC1|U74C1_ARATH UDP-glycosyltransferase 74C1 OS=Arabidopsis thaliana OX=3702 GN=UGT74C1 PE=2 SV=1	25.6176	25.3524	25.1171	25.195	25.6024	25.7656	25.6716	25.7866		1.76259	-0.386047
0.0173141	1.14		sp|Q9FVT2|EF1G2_ARATH Probable elongation factor 1-gamma 2 OS=Arabidopsis thaliana OX=3702 GN=At1g57720 PE=1 SV=1	30.7086	30.7065	30.686	30.7063	30.5721	30.4987	30.3573	30.6232		1.7616	0.189031
0.0174025	0.778264	At5g24650	sp|Q9FLT9|HP302_ARATH Chloroplastic import inner membrane translocase subunit HP30-2 OS=Arabidopsis thaliana OX=3702 GN=HP30-2 PE=1 SV=1	26.1939	26.2	25.8258	26.2725	26.4021	26.5615	26.404	26.5712		1.75939	-0.361669
0.0175233	1.3471	SDR4	sp|F4J2Z7|SDR4_ARATH Short-chain dehydrogenase reductase 4 OS=Arabidopsis thaliana OX=3702 GN=SDR4 PE=2 SV=1	28.7064	28.5746	28.372	28.6563	28.2974	28.1496	27.8357	28.3072		1.75638	0.42986
0.0176827	0.843234	LA1	sp|Q93ZV7|LA1_ARATH La protein 1 OS=Arabidopsis thaliana OX=3702 GN=LA1 PE=1 SV=1	27.4611	27.3784	27.291	27.2337	27.5001	27.4938	27.6185	27.7357		1.75245	-0.245995
0.0178877	1.28942	PPC3	sp|Q84VW9|CAPP3_ARATH Phosphoenolpyruvate carboxylase 3 OS=Arabidopsis thaliana OX=3702 GN=PPC3 PE=1 SV=2	32.1535	32.2298	32.4571	32.0757	31.9334	31.7768	32.044	31.695		1.74745	0.366718
0.0179223	1.20919	SOT17	sp|Q9FZ80|SOT17_ARATH Cytosolic sulfotransferase 17 OS=Arabidopsis thaliana OX=3702 GN=SOT17 PE=1 SV=1	26.9189	27.0373	26.773	26.7712	26.7503	26.606	26.5611	26.4868		1.74661	0.27404
0.0179236	0.926957	BOU	sp|Q93XM7|MCAT_ARATH Mitochondrial carnitine/acylcarnitine carrier-like protein OS=Arabidopsis thaliana OX=3702 GN=BOU PE=1 SV=1	26.7729	26.8841	26.771	26.7749	26.9316	26.8719	26.9535	26.8838		1.74658	-0.109426
0.0179589	1.13557	CRT2	sp|Q38858|CALR2_ARATH Calreticulin-2 OS=Arabidopsis thaliana OX=3702 GN=CRT2 PE=1 SV=3	30.4581	30.498	30.586	30.5788	30.3067	30.2527	30.3525	30.4754		1.74572	0.183417
0.0180294	0.828289	TIC20-II	sp|O82251|TI202_ARATH Protein TIC 20-II, chloroplastic OS=Arabidopsis thaliana OX=3702 GN=TIC20-II PE=2 SV=1	25.405	25.3821	25.2984	25.5742	25.5708	25.8482	25.7118	25.6161		1.74402	-0.271793
0.0180598	1.15453	CNX1	sp|P29402|CALX1_ARATH Calnexin homolog 1 OS=Arabidopsis thaliana OX=3702 GN=CNX1 PE=1 SV=1	30.1526	30.1574	30.0947	30.1054	29.9166	29.7931	29.8811	30.0901		1.74329	0.207308
0.0181553	0.735349		sp|Q9FJE8|H2A7_ARATH Probable histone H2A.7 OS=Arabidopsis thaliana OX=3702 GN=At5g59870 PE=1 SV=1	29.8165	29.626	29.2348	29.5279	29.8248	29.9635	30.0737	30.1172		1.741	-0.443498
0.0182309	1.31769	GAD2	sp|Q42472|DCE2_ARATH Glutamate decarboxylase 2 OS=Arabidopsis thaliana OX=3702 GN=GAD2 PE=1 SV=1	28.642	28.7043	28.6441	28.4105	28.3083	28.1895	28.398	27.9131		1.73919	0.398015
0.0184818	1.14328	PFP-BETA2	sp|F4JGR5|PFPB2_ARATH Pyrophosphate--fructose 6-phosphate 1-phosphotransferase subunit beta 2 OS=Arabidopsis thaliana OX=3702 GN=PFP-BETA2 PE=3 SV=1	25.7298	25.781	25.6003	25.7526	25.5661	25.4208	25.6244	25.4797		1.73326	0.193184
0.0185155	1.34058	ZW10	sp|O48626|ZW10_ARATH Centromere/kinetochore protein zw10 homolog OS=Arabidopsis thaliana OX=3702 GN=ZW10 PE=1 SV=1	26.6834	26.3099	26.1968	26.3062	26.057	26.083	25.7417	25.9231		1.73247	0.422863
0.0185176	1.15231	PPOX2	sp|Q8S9J1|PPOCM_ARATH Protoporphyrinogen oxidase 2, chloroplastic/mitochondrial OS=Arabidopsis thaliana OX=3702 GN=PPOX2 PE=1 SV=1	26.3672	26.4699	26.4068	26.4721	26.1784	26.3983	26.1437	26.1775		1.73242	0.204529
0.0185367	1.26686		sp|Q9SJA7|SOX_ARATH Probable sarcosine oxidase OS=Arabidopsis thaliana OX=3702 GN=At2g24580 PE=2 SV=1	27.2983	27.2852	27.1389	27.2484	26.8451	26.8625	26.7132	27.185		1.73197	0.341255
0.0186047	0.890961	RPS3AA	sp|Q9CAV0|RS3A1_ARATH 40S ribosomal protein S3a-1 OS=Arabidopsis thaliana OX=3702 GN=RPS3AA PE=1 SV=3	31.4775	31.4602	31.5079	31.5993	31.6682	31.6261	31.618	31.7989		1.73038	-0.166565
0.0186455	1.30281	RPS9C	sp|Q9FLF0|RS92_ARATH 40S ribosomal protein S9-2 OS=Arabidopsis thaliana OX=3702 GN=RPS9C PE=1 SV=1	27.1676	27.0385	26.9287	26.6559	26.6492	26.4314	26.5571	26.6266		1.72943	0.381624
0.0187235	0.73486	F7G19.6	sp|O04023|SRC2_ARATH Protein SRC2 homolog OS=Arabidopsis thaliana OX=3702 GN=SRC2 PE=1 SV=1	26.1503	25.9245	26.4289	26.0665	26.6749	26.6783	26.6775	26.3174		1.72761	-0.444458
0.0188097	1.27935	CCR1	sp|Q9S9N9|CCR1_ARATH Cinnamoyl-CoA reductase 1 OS=Arabidopsis thaliana OX=3702 GN=CCR1 PE=1 SV=1	27.7118	27.8017	27.7768	27.4455	27.508	27.3867	27.1604	27.259		1.72562	0.35541
0.0188251	1.15974	UBP13	sp|Q84WU2|UBP13_ARATH Ubiquitin C-terminal hydrolase 13 OS=Arabidopsis thaliana OX=3702 GN=UBP13 PE=1 SV=1	28.4212	28.3311	28.4285	28.2539	28.1719	28.1793	27.9925	28.2358		1.72526	0.213807
0.0191303	1.09875	AKR2B	sp|Q29Q26|AKR2B_ARATH Ankyrin repeat domain-containing protein 2B OS=Arabidopsis thaliana OX=3702 GN=AKR2B PE=1 SV=1	28.4762	28.4959	28.5586	28.429	28.4067	28.2868	28.4155	28.3071		1.71828	0.135866
0.0192724	0.785989	ARLA1C	sp|Q8VY57|ARL8A_ARATH ADP-ribosylation factor-like protein 8a OS=Arabidopsis thaliana OX=3702 GN=ARL8A PE=2 SV=1	27.593	27.2924	27.245	27.2276	27.7401	27.6968	27.4955	27.8152		1.71506	-0.347418
0.0194569	0.908303	RPL4A	sp|Q9SF40|RL4A_ARATH 60S ribosomal protein L4-1 OS=Arabidopsis thaliana OX=3702 GN=RPL4A PE=1 SV=1	31.476	31.405	31.3973	31.5715	31.6233	31.5506	31.6173	31.6137		1.71093	-0.138754
0.019497	0.909866	HSP70-10	sp|Q9LDZ0|HSP7J_ARATH Heat shock 70 kDa protein 10, mitochondrial OS=Arabidopsis thaliana OX=3702 GN=HSP70-10 PE=1 SV=1	28.7807	28.7386	28.8081	28.8391	29.0062	28.8822	28.8481	28.9751		1.71003	-0.136274
0.0196013	1.09959	CAS	sp|Q9ZPY7|XPO2_ARATH Exportin-2 OS=Arabidopsis thaliana OX=3702 GN=CAS PE=2 SV=1	27.9904	27.9585	27.9934	27.9109	27.7954	27.8868	27.7306	27.8925		1.70771	0.136969
0.0197597	1.2412	PUX10	sp|Q9M0N1|PUX10_ARATH Plant UBX domain-containing protein 10 OS=Arabidopsis thaliana OX=3702 GN=PUX10 PE=2 SV=1	26.8471	26.7393	26.6373	26.5856	26.2389	26.5839	26.2805	26.459		1.70422	0.311737
0.0198404	1.2	OS9	sp|Q8GWH3|OS9_ARATH Protein OS-9 homolog OS=Arabidopsis thaliana OX=3702 GN=OS9 PE=1 SV=1	25.7436	25.9332	25.9308	25.7238	25.4032	25.5733	25.6908	25.6118		1.70245	0.263038
0.0198536	1.29632	AAO1	sp|Q7G193|ALDO1_ARATH Indole-3-acetaldehyde oxidase OS=Arabidopsis thaliana OX=3702 GN=AAO1 PE=1 SV=2	27.7495	27.8411	27.9226	27.5556	27.6234	27.4393	27.2795	27.2289		1.70216	0.374421
0.0200389	0.73361	At2g17760	sp|Q8VYV9|APF1_ARATH Aspartyl protease family protein 1 OS=Arabidopsis thaliana OX=3702 GN=APF1 PE=2 SV=1	24.6401	24.8112	24.8758	24.6609	24.8334	25.2079	25.286	25.4483		1.69813	-0.446915
0.0200959	1.14883	SHD	sp|Q9STX5|ENPL_ARATH Endoplasmin homolog OS=Arabidopsis thaliana OX=3702 GN=HSP90-7 PE=1 SV=1	30.3744	30.3824	30.3434	30.4446	30.181	30.1763	30.0465	30.3403		1.69689	0.200162
0.0201059	1.22851		sp|Q9C5C4|ARGE_ARATH Acetylornithine deacetylase OS=Arabidopsis thaliana OX=3702 GN=At4g17830 PE=2 SV=1	27.4909	27.7661	27.7345	27.3979	27.2403	27.3732	27.2949	27.2933		1.69668	0.296911
0.0201935	1.18789	ACC1	sp|Q38970|ACC1_ARATH Acetyl-CoA carboxylase 1 OS=Arabidopsis thaliana OX=3702 GN=ACC1 PE=1 SV=1	31.8322	31.8691	31.6711	31.7871	31.6069	31.561	31.3492	31.6488		1.69479	0.248401
0.0203226	1.303	AAE7	sp|Q8VZF1|AEE7_ARATH Acetate/butyrate--CoA ligase AAE7, peroxisomal OS=Arabidopsis thaliana OX=3702 GN=AAE7 PE=1 SV=1	27.609	27.7253	27.741	27.3175	27.3634	27.2865	27.1886	27.0271		1.69202	0.381838
0.0204443	0.822428	RRP41	sp|Q9SP08|RRP41_ARATH Exosome complex component RRP41 homolog OS=Arabidopsis thaliana OX=3702 GN=RRP41 PE=1 SV=1	24.2185	24.3912	24.18	24.3508	24.6819	24.5537	24.3613	24.6717		1.68943	-0.282039
0.0204716	1.13564	CASP	sp|Q9LS42|CASP_ARATH Protein CASP OS=Arabidopsis thaliana OX=3702 GN=CASP PE=1 SV=2	25.7421	25.6547	25.6061	25.6476	25.4878	25.5278	25.3332	25.5677		1.68885	0.183499
0.0205844	1.26396	dl4440w	sp|O23523|RGGA_ARATH RGG repeats nuclear RNA binding protein A OS=Arabidopsis thaliana OX=3702 GN=RGGA PE=1 SV=1	26.641	26.6652	26.8924	26.5638	26.5789	26.2293	26.3691	26.2333		1.68646	0.337954
0.0206184	1.17743	At5g25265	sp|Q8W4E6|HPAT1_ARATH Hydroxyproline O-arabinosyltransferase 1 OS=Arabidopsis thaliana OX=3702 GN=HPAT1 PE=1 SV=1	27.0385	27.1147	26.9225	26.8983	26.7899	26.8295	26.5916	26.8203		1.68575	0.235644
0.0206419	1.2091	RPS21C	sp|Q3E902|RS212_ARATH 40S ribosomal protein S21-2 OS=Arabidopsis thaliana OX=3702 GN=RPS21C PE=1 SV=2	29.6035	29.6644	29.4541	29.3974	29.3174	29.3535	29.0767	29.276		1.68525	0.273935
0.0206723	1.14099	ALDH7B4	sp|Q9SYG7|AL7B4_ARATH Aldehyde dehydrogenase family 7 member B4 OS=Arabidopsis thaliana OX=3702 GN=ALDH7B4 PE=2 SV=3	29.6917	29.8177	29.8927	29.6452	29.6166	29.5793	29.5099	29.5803		1.68461	0.190289
0.0207038	1.16843	RPT4A	sp|Q9SEI3|PS10A_ARATH 26S proteasome regulatory subunit 10B homolog A OS=Arabidopsis thaliana OX=3702 GN=RPT4A PE=1 SV=1	29.385	29.3802	29.3821	29.2833	29.1266	29.1217	28.9767	29.3073		1.68395	0.224568
0.0209583	1.26056		sp|Q9FN41|MTBC_ARATH Probable bifunctional methylthioribulose-1-phosphate dehydratase/enolase-phosphatase E1 OS=Arabidopsis thaliana OX=3702 GN=At5g53850 PE=1 SV=1	28.1963	28.0562	28.3883	27.923	27.8674	27.804	27.8633	27.6927		1.67864	0.334069
0.0210132	1.23419	RPL19C	sp|P49693|RL193_ARATH 60S ribosomal protein L19-3 OS=Arabidopsis thaliana OX=3702 GN=RPL19C PE=2 SV=3	28.6584	28.5052	28.3367	28.4628	28.3112	28.0971	28.0327	28.308		1.67751	0.303559
0.0210549	1.15625	At4g31180	sp|Q9M084|SYDC2_ARATH Aspartate--tRNA ligase 2, cytoplasmic OS=Arabidopsis thaliana OX=3702 GN=IBI1 PE=1 SV=1	28.3946	28.3057	28.3408	28.243	28.24	28.1688	27.9659	28.0715		1.67665	0.209452
0.0211164	0.860389	F18B13.15	sp|Q9SSD2|PRP8A_ARATH Pre-mRNA-processing-splicing factor 8A OS=Arabidopsis thaliana OX=3702 GN=PRP8A PE=1 SV=1	27.2599	27.3512	27.2109	27.359	27.6116	27.5513	27.3376	27.5483		1.67538	-0.216939
0.0212266	1.17288	ALATS	sp|P36428|SYA_ARATH Alanine--tRNA ligase OS=Arabidopsis thaliana OX=3702 GN=ALATS PE=1 SV=3	28.6967	28.7288	28.7935	28.5001	28.537	28.4682	28.4458	28.3479		1.67312	0.230062
0.0212332	1.28229		sp|Q9ZVJ2|AMERL_ARATH Uncharacterized protein At2g38710 OS=Arabidopsis thaliana OX=3702 GN=At2g38710 PE=2 SV=1	27.9451	27.9969	27.8442	27.8834	27.5795	27.7868	27.2552	27.6132		1.67299	0.358722
0.0212678	1.33325	LACS7	sp|Q8LKS5|LACS7_ARATH Long chain acyl-CoA synthetase 7, peroxisomal OS=Arabidopsis thaliana OX=3702 GN=LACS7 PE=1 SV=2	27.4773	27.649	27.5788	27.1062	27.0715	27.1598	27.0394	26.8809		1.67228	0.414945
0.0213752	0.712296	ABCC4	sp|Q7DM58|AB4C_ARATH ABC transporter C family member 4 OS=Arabidopsis thaliana OX=3702 GN=ABCC4 PE=1 SV=2	26.0022	26.0068	26.3222	26.3351	26.458	26.5085	26.6349	27.0226		1.67009	-0.489452
0.0214529	1.24002	PRR2	sp|Q9SVP6|PILR2_ARATH Pinoresinol reductase 2 OS=Arabidopsis thaliana OX=3702 GN=PRR2 PE=1 SV=1	27.6772	27.5159	27.3806	27.6281	27.4428	27.2165	27.0751	27.2259		1.66851	0.310359
0.0215587	1.3501	PER30	sp|Q9LSY7|PER30_ARATH Peroxidase 30 OS=Arabidopsis thaliana OX=3702 GN=PER30 PE=1 SV=1	29.4957	29.4512	29.2303	29.2697	29.0778	29.166	28.6095	28.8613		1.66638	0.433064
0.0216358	1.21005	GSNAP	sp|Q9SPE5|SNAG_ARATH Gamma-soluble NSF attachment protein OS=Arabidopsis thaliana OX=3702 GN=GSNAP PE=2 SV=1	26.8051	26.7103	26.5626	26.6637	26.4869	26.4094	26.2046	26.5406		1.66483	0.275066
0.021829	1.14554	PDIL1-1	sp|Q9XI01|PDI11_ARATH Protein disulfide isomerase-like 1-1 OS=Arabidopsis thaliana OX=3702 GN=PDIL1-1 PE=1 SV=1	30.1724	30.0325	30.1807	30.2178	29.9691	29.8153	29.9904	30.0444		1.66097	0.196033
0.0218528	1.3393		sp|Q93ZN2|ALKR4_ARATH Probable aldo-keto reductase 4 OS=Arabidopsis thaliana OX=3702 GN=At1g60710 PE=2 SV=1	29.3427	29.4696	29.5522	29.0622	29.0992	28.9839	28.9628	28.6948		1.66049	0.421475
0.0218838	1.40321	CYTB5-B	sp|O48845|CYB5B_ARATH Cytochrome b5 isoform B OS=Arabidopsis thaliana OX=3702 GN=CYTB5-B PE=1 SV=1	27.3228	27.1215	27.122	27.3172	26.5866	26.4694	26.7231	27.1494		1.65988	0.48873
0.0219265	1.09234	NUDT3	sp|Q8L831|NUDT3_ARATH Nudix hydrolase 3 OS=Arabidopsis thaliana OX=3702 GN=NUDT3 PE=1 SV=1	28.0029	27.9952	27.9728	27.9146	27.9113	27.8796	27.7436	27.8414		1.65903	0.127427
0.0221764	1.24698	PSL5	sp|Q9FN05|PSL5_ARATH Probable glucan 1,3-alpha-glucosidase OS=Arabidopsis thaliana OX=3702 GN=PSL5 PE=1 SV=1	28.05	28.0612	27.8541	28.1516	27.7679	27.761	27.4685	27.8458		1.65411	0.318444
0.0222503	1.17413	HACL	sp|Q9LF46|HACL_ARATH 2-hydroxyacyl-CoA lyase OS=Arabidopsis thaliana OX=3702 GN=HACL PE=1 SV=1	29.6971	29.8674	29.9725	29.6489	29.5611	29.5673	29.5885	29.5425		1.65266	0.231594
0.0224205	1.15297	XPO1	sp|Q9SMV6|XPO1A_ARATH Protein EXPORTIN 1A OS=Arabidopsis thaliana OX=3702 GN=XPO1 PE=1 SV=1	27.839	27.9016	27.7774	27.8227	27.4992	27.6894	27.5575	27.7731		1.64935	0.205351
0.0227665	1.3087	AAC3	sp|O49447|ADT3_ARATH ADP,ATP carrier protein 3, mitochondrial OS=Arabidopsis thaliana OX=3702 GN=AAC3 PE=1 SV=1	24.992	25.0532	24.9955	24.9153	24.8241	24.6243	24.7068	24.2483		1.6427	0.388136
0.022968	0.888737		sp|Q9ZW85|LEUD3_ARATH 3-isopropylmalate dehydratase small subunit 1 OS=Arabidopsis thaliana OX=3702 GN=SSU1 PE=1 SV=1	28.7455	28.5603	28.6029	28.6665	28.8897	28.8608	28.7901	28.7153		1.63888	-0.170171
0.0229701	0.899663		sp|Q9LEU8|ARLY_ARATH Argininosuccinate lyase, chloroplastic OS=Arabidopsis thaliana OX=3702 GN=At5g10920 PE=2 SV=1	28.015	28.0334	27.9346	27.8795	28.0664	28.1168	28.0711	28.2183		1.63884	-0.152543
0.0230593	0.834666	GRP23	sp|Q9SY69|PPR29_ARATH Pentatricopeptide repeat-containing protein At1g10270 OS=Arabidopsis thaliana OX=3702 GN=GRP23 PE=1 SV=1	25.2591	25.1905	25.1592	24.9148	25.3423	25.5172	25.3439	25.3631		1.63715	-0.26073
0.0231306	1.25201		sp|O80763|NRX1_ARATH Probable nucleoredoxin 1 OS=Arabidopsis thaliana OX=3702 GN=At1g60420 PE=1 SV=1	28.2717	28.3709	28.387	28.014	28.0504	28.0371	27.865	27.7941		1.63581	0.324243
0.0231325	1.27646	MSBP2	sp|Q9M2Z4|MSBP2_ARATH Membrane steroid-binding protein 2 OS=Arabidopsis thaliana OX=3702 GN=MSBP2 PE=1 SV=1	28.1513	28.3928	28.3544	28.0792	28.0302	28.0504	27.7905	27.698		1.63578	0.352149
0.0231697	0.90035	TIM50	sp|Q8VYE2|TIM50_ARATH Mitochondrial import inner membrane translocase subunit TIM50 OS=Arabidopsis thaliana OX=3702 GN=TIM50 PE=1 SV=1	26.0531	26.0353	26.0649	26.1262	26.2738	26.2238	26.0912	26.2966		1.63508	-0.151442
0.023238	0.862599	VPS33	sp|Q94KJ7|VPS33_ARATH Vacuolar protein-sorting-associated protein 33 homolog OS=Arabidopsis thaliana OX=3702 GN=VPS33 PE=1 SV=1	25.1104	25.0907	25.1823	25.1475	25.2496	25.2108	25.4741	25.4494		1.6338	-0.213238
0.023438	1.16027	FIP1	sp|Q9SE96|GEML1_ARATH GEM-like protein 1 OS=Arabidopsis thaliana OX=3702 GN=FIP1 PE=1 SV=1	27.2297	27.1277	27.2355	27.1883	27.1341	27.049	26.8539	26.8865		1.63008	0.214456
0.0234492	0.836923	SUFE1	sp|Q84W65|SUFE1_ARATH SufE-like protein 1, chloroplastic/mitochondrial OS=Arabidopsis thaliana OX=3702 GN=SUFE1 PE=1 SV=2	25.6826	25.6204	25.621	25.6816	25.9075	25.7229	26.1267	25.8759		1.62987	-0.256833
0.0235149	1.08021	HSP70-3	sp|O65719|HSP7C_ARATH Heat shock 70 kDa protein 3 OS=Arabidopsis thaliana OX=3702 GN=HSP70-3 PE=1 SV=1	29.9509	29.8373	29.9427	29.8894	29.7631	29.7487	29.7988	29.8644		1.62866	0.111307
0.023676	1.34093		sp|Q9FKA5|Y5957_ARATH Uncharacterized protein At5g39570 OS=Arabidopsis thaliana OX=3702 GN=At5g39570 PE=1 SV=1	30.0541	30.001	30.1082	30.0499	29.6669	29.2793	29.9568	29.6173		1.62569	0.423233
0.0237173	1.23021	SAC7	sp|Q9C5G5|SAC7_ARATH Phosphoinositide phosphatase SAC7 OS=Arabidopsis thaliana OX=3702 GN=SAC7 PE=2 SV=1	27.168	27.044	27.079	27.2256	26.9257	26.8072	26.5872	27.0008		1.62493	0.298908
0.0237348	0.842324	PAT1	sp|Q02166|TRPD_ARATH Anthranilate phosphoribosyltransferase, chloroplastic OS=Arabidopsis thaliana OX=3702 GN=PAT1 PE=2 SV=1	26.4876	26.6186	26.4781	26.4232	26.5833	26.8787	26.8564	26.6794		1.62461	-0.247553
0.0239008	1.19199	HSP70-16	sp|Q9SAB1|HSP7Q_ARATH Heat shock 70 kDa protein 16 OS=Arabidopsis thaliana OX=3702 GN=HSP70-16 PE=2 SV=1	27.213	27.2791	27.0732	26.9777	26.7764	26.8188	26.9812	26.9529		1.62159	0.253375
0.0239262	1.18203	CEF	sp|Q9M291|SC24C_ARATH Protein transport protein Sec24-like CEF OS=Arabidopsis thaliana OX=3702 GN=CEF PE=2 SV=3	27.7771	27.8618	27.7077	27.7195	27.4977	27.5931	27.3371	27.6732		1.62113	0.241261
0.0239348	0.83988	BGAL9	sp|Q9SCV3|BGAL9_ARATH Beta-galactosidase 9 OS=Arabidopsis thaliana OX=3702 GN=BGAL9 PE=2 SV=1	25.7245	25.7352	25.43	25.5789	25.7822	25.9852	25.8757	25.8325		1.62097	-0.251745
0.0240306	1.2068	CYP40	sp|Q9C566|CYP40_ARATH Peptidyl-prolyl cis-trans isomerase CYP40 OS=Arabidopsis thaliana OX=3702 GN=CYP40 PE=2 SV=1	26.0785	25.7726	26.0373	25.7835	25.5909	25.7246	25.5671	25.7045		1.61924	0.271181
0.0244063	0.688518	SWA1	sp|O82266|SWA1_ARATH Protein SLOW WALKER 1 OS=Arabidopsis thaliana OX=3702 GN=SWA1 PE=2 SV=1	24.8606	24.2542	24.7731	24.8029	25.5228	25.1824	24.9847	25.1546		1.6125	-0.538434
0.0244657	0.875046	RH2	sp|Q94A52|RH2_ARATH Eukaryotic initiation factor 4A-III homolog OS=Arabidopsis thaliana OX=3702 GN=EIF4A3 PE=1 SV=2	27.6488	27.641	27.5991	27.7383	27.9125	27.8571	27.6853	27.9426		1.61144	-0.192569
0.0244751	1.38399	REP	sp|Q8LLD4|REP_ARATH Rab escort protein 1 OS=Arabidopsis thaliana OX=3702 GN=REP PE=1 SV=2	26.236	26.1904	26.3619	25.7747	25.8637	25.5767	25.4638	25.7834		1.61127	0.468835
0.0245637	1.12874	PEX22	sp|Q9LSX7|PEX22_ARATH Peroxisome biogenesis protein 22 OS=Arabidopsis thaliana OX=3702 GN=PEX22 PE=1 SV=1	27.5678	27.531	27.431	27.5593	27.2498	27.464	27.2832	27.3933		1.60971	0.174716
0.0246264	0.746615		sp|Q9FNG3|RICE2_ARATH Protein RISC-INTERACTING CLEARING 3-5 EXORIBONUCLEASE 2 OS=Arabidopsis thaliana OX=3702 GN=RICE2 PE=1 SV=1	24.2884	24.0005	23.8151	24.0249	24.2476	24.3779	24.733	24.4568		1.6086	-0.421563
0.024669	1.24729		sp|O48962|EBP_ARATH Probable 3-beta-hydroxysteroid-Delta(8),Delta(7)-isomerase OS=Arabidopsis thaliana OX=3702 GN=At1g20050 PE=2 SV=1	28.8345	28.7536	28.7575	28.8926	28.5899	28.6168	28.1871	28.5693		1.60785	0.318795
0.0246951	0.8476	UBA2C	sp|Q9LKA4|UBA2C_ARATH UBP1-associated protein 2C OS=Arabidopsis thaliana OX=3702 GN=UBA2C PE=2 SV=1	26.0008	25.8478	25.9671	26.1268	26.2611	26.294	26.0578	26.2838		1.60739	-0.238545
0.0247642	0.744904		sp|Q84JF7|KAD6C_ARATH Probable adenylate kinase 6, chloroplastic OS=Arabidopsis thaliana OX=3702 GN=At2g39270 PE=2 SV=1	24.039	24.3935	24.4917	24.3127	24.4691	24.6718	24.9397	24.8558		1.60618	-0.424874
0.024814	0.863203	DHDPS1	sp|Q9LZX6|DAPA1_ARATH 4-hydroxy-tetrahydrodipicolinate synthase 1, chloroplastic OS=Arabidopsis thaliana OX=3702 GN=DHDPS1 PE=2 SV=2	27.0225	26.9074	27.0561	27.1007	27.3147	27.253	27.0641	27.3038		1.6053	-0.212228
0.0248629	0.831294	HSP70-6	sp|Q9STW6|HSP7F_ARATH Heat shock 70 kDa protein 6, chloroplastic OS=Arabidopsis thaliana OX=3702 GN=HSP70-6 PE=1 SV=1	28.9814	28.9613	28.9515	28.9873	29.1649	29.1699	29.5018	29.1113		1.60445	-0.266569
0.0249391	1.06633	PYD1	sp|Q9LVI9|DPYD_ARATH Dihydropyrimidine dehydrogenase (NADP(+)), chloroplastic OS=Arabidopsis thaliana OX=3702 GN=PYD1 PE=1 SV=1	29.3064	29.3421	29.3741	29.3672	29.2738	29.2832	29.1737	29.2883		1.60312	0.0926499
0.0249562	1.1633		sp|Q9LV66|Y5848_ARATH Uncharacterized protein At5g48480 OS=Arabidopsis thaliana OX=3702 GN=At5g48480 PE=1 SV=1	27.5067	27.6041	27.352	27.548	27.3567	27.2695	27.3623	27.1495		1.60282	0.218226
0.0250702	1.21201	PRMT13	sp|Q84W92|ANM13_ARATH Probable histone-arginine methyltransferase 1.3 OS=Arabidopsis thaliana OX=3702 GN=PRMT13 PE=1 SV=3	26.8723	26.7804	26.9272	26.8146	26.5429	26.3349	26.684	26.723		1.60084	0.277406
0.0254067	0.711224	GASA4	sp|P46690|GASA4_ARATH Gibberellin-regulated protein 4 OS=Arabidopsis thaliana OX=3702 GN=GASA4 PE=1 SV=2	28.5114	28.5658	28.2893	28.2618	28.9676	29.2858	28.7047	28.6367		1.59505	-0.491624
0.0254437	0.915176	TOC34	sp|Q38906|TOC34_ARATH Translocase of chloroplast 34, chloroplastic OS=Arabidopsis thaliana OX=3702 GN=TOC34 PE=1 SV=2	27.7064	27.7513	27.6563	27.7793	27.9452	27.8504	27.7874	27.8217		1.59442	-0.127879
0.0255416	1.38838	ALG11	sp|Q9XEE9|ALG11_ARATH GDP-Man:Man(3)GlcNAc(2)-PP-Dol alpha-1,2-mannosyltransferase OS=Arabidopsis thaliana OX=3702 GN=ALG11 PE=1 SV=2	25.1299	25.0265	24.8439	25.1533	24.6515	24.5195	24.1991	24.8899		1.59275	0.473398
0.0256586	1.05044	APX1	sp|Q05431|APX1_ARATH L-ascorbate peroxidase 1, cytosolic OS=Arabidopsis thaliana OX=3702 GN=APX1 PE=1 SV=2	33.1195	33.1652	33.0767	33.0758	33.0561	33.028	33.0579	33.0112		1.59077	0.0709896
0.0256652	1.08391	LOG8	sp|Q84MC2|LOG8_ARATH Cytokinin riboside 5-monophosphate phosphoribohydrolase LOG8 OS=Arabidopsis thaliana OX=3702 GN=LOG8 PE=1 SV=1	26.3777	26.3789	26.4305	26.3414	26.2674	26.2851	26.1717	26.3393		1.59066	0.116244
0.0257337	0.817494	GLL22	sp|Q1H583|GDL18_ARATH GDSL esterase/lipase 22 OS=Arabidopsis thaliana OX=3702 GN=GLL22 PE=1 SV=1	31.0339	30.9957	30.9975	31.2318	31.334	31.3177	31.1913	31.5787		1.5895	-0.29072
0.0257505	1.18117	4CL1	sp|Q42524|4CL1_ARATH 4-coumarate--CoA ligase 1 OS=Arabidopsis thaliana OX=3702 GN=4CL1 PE=1 SV=1	28.7821	28.8996	28.8046	28.9098	28.5347	28.6926	28.4389	28.7691		1.58921	0.240214
0.0258462	1.32772	CHI-B	sp|P19171|CHIB_ARATH Basic endochitinase B OS=Arabidopsis thaliana OX=3702 GN=CHI-B PE=1 SV=3	29.437	29.3579	29.3739	29.1386	29.0416	29.2024	28.7399	28.6877		1.5876	0.408956
0.0261814	1.20327	At3g28940	sp|Q9MBH2|AIG2B_ARATH Protein AIG2 B OS=Arabidopsis thaliana OX=3702 GN=AIG2B PE=2 SV=1	30.0761	29.8877	29.969	29.7998	29.5862	29.731	29.8272	29.5202		1.58201	0.266955
0.0262013	1.25457	TAT	sp|Q9LVY1|TAT_ARATH Tyrosine aminotransferase OS=Arabidopsis thaliana OX=3702 GN=TAT PE=2 SV=1	27.8825	28.0374	28.2129	27.7745	27.7484	27.75	27.5663	27.5339		1.58168	0.327199
0.0263436	1.26931	OPR2	sp|Q8GYB8|OPR2_ARATH 12-oxophytodienoate reductase 2 OS=Arabidopsis thaliana OX=3702 GN=OPR2 PE=1 SV=2	28.7385	28.6964	28.9861	28.4778	28.4634	28.4367	28.4002	28.2225		1.57932	0.344047
0.0263635	0.676446	FER1	sp|Q39101|FRI1_ARATH Ferritin-1, chloroplastic OS=Arabidopsis thaliana OX=3702 GN=FER1 PE=1 SV=1	29.7595	29.8302	29.445	30.2	30.2268	30.1305	30.5365	30.5967		1.579	-0.563952
0.026533	0.727863		sp|Q7FMW4|AB38G_ORYSJ ABC transporter G family member 38 OS=Oryza sativa subsp. japonica OX=39947 GN=ABCG38 PE=3 SV=1	26.8585	26.7261	26.854	26.6281	26.9702	27.6286	27.0527	27.2483		1.57621	-0.458261
0.0267052	1.18402	RABB1C	sp|P92963|RAB1C_ARATH Ras-related protein RABB1c OS=Arabidopsis thaliana OX=3702 GN=RABB1C PE=1 SV=1	27.8772	27.8032	27.7352	27.7428	27.5485	27.663	27.3283	27.644		1.5734	0.243697
0.0267212	1.18855	SOT16	sp|Q9C9D0|SOT16_ARATH Cytosolic sulfotransferase 16 OS=Arabidopsis thaliana OX=3702 GN=SOT16 PE=1 SV=1	28.964	28.9858	28.7759	28.8742	28.7582	28.7575	28.4595	28.6279		1.57314	0.2492
0.026878	1.18535	RBG8	sp|Q03251|RBG8_ARATH Glycine-rich RNA-binding protein 8 OS=Arabidopsis thaliana OX=3702 GN=RBG8 PE=1 SV=1	31.9771	31.9681	31.7456	31.8463	31.6631	31.6577	31.4643	31.7706		1.5706	0.245313
0.027008	0.770491	T13M11.9	sp|Q9SYA9|STKLD_ARATH Probable transcription factor At1g61730 OS=Arabidopsis thaliana OX=3702 GN=At1g61730 PE=1 SV=1	25.7133	25.6005	25.7469	25.3768	26.2246	26.0581	25.8837	25.7759		1.56851	-0.37615
0.0270218	1.10017		sp|Q9SA34|IMDH2_ARATH Inosine-5-monophosphate dehydrogenase 2 OS=Arabidopsis thaliana OX=3702 GN=At1g16350 PE=1 SV=1	28.9102	28.8712	28.8385	28.9597	28.8073	28.719	28.6655	28.8369		1.56829	0.137722
0.0270592	1.33672	CAT2	sp|P25819|CATA2_ARATH Catalase-2 OS=Arabidopsis thaliana OX=3702 GN=CAT2 PE=1 SV=3	31.5465	31.6906	31.518	31.2985	31.0489	31.0033	31.4374	30.8893		1.56768	0.4187
0.0271609	0.891416	F9H16.5	sp|Q9SYP1|DEXHC_ARATH DExH-box ATP-dependent RNA helicase DExH12 OS=Arabidopsis thaliana OX=3702 GN=BRR2A PE=1 SV=1	26.8492	27.0287	26.7836	26.885	27.0717	27.0861	26.9812	27.0707		1.56606	-0.165829
0.0273942	1.14258	FYPP3	sp|Q8LSN3|FYPP_PEA Phytochrome-associated serine/threonine-protein phosphatase OS=Pisum sativum OX=3888 GN=FYPP PE=1 SV=1;sp|Q9LHE7|FYPP3_ARATH Phytochrome-associated serine/threonine-protein phosphatase 3 OS=Arabidopsis thaliana OX=3702 GN=FYPP3 PE=1 SV=1	27.4703	27.5157	27.4319	27.4051	27.3113	27.3773	27.0889	27.2763		1.56234	0.192301
0.0274815	1.18513	HOL3	sp|Q6AWU6|HOL3_ARATH Probable thiol methyltransferase 2 OS=Arabidopsis thaliana OX=3702 GN=HOL3 PE=1 SV=1	28.0946	28.1936	28.1302	27.9396	28.0067	27.875	27.6975	27.7987		1.56096	0.24505
0.0275726	1.13693		sp|O04487|EF1G1_ARATH Probable elongation factor 1-gamma 1 OS=Arabidopsis thaliana OX=3702 GN=At1g09640 PE=1 SV=1	30.3367	30.2847	30.2619	30.1585	30.1273	30.1737	29.9344	30.0659		1.55952	0.185145
0.0276095	1.16915	E1 ALPHA	sp|P52901|ODPA1_ARATH Pyruvate dehydrogenase E1 component subunit alpha-1, mitochondrial OS=Arabidopsis thaliana OX=3702 GN=E1 ALPHA PE=1 SV=2	28.3573	28.5389	28.4825	28.2935	28.262	28.2509	28.2252	28.0324		1.55894	0.225461
0.0276538	1.13005		sp|Q9SJT9|COPA2_ARATH Coatomer subunit alpha-2 OS=Arabidopsis thaliana OX=3702 GN=At2g21390 PE=2 SV=1	28.8049	28.797	28.7267	28.8953	28.6562	28.6216	28.4991	28.7415		1.55824	0.176382
0.0276825	0.709757		sp|O64725|NDB3A_ARATH NADH dehydrogenase [ubiquinone] 1 beta subcomplex subunit 3-A OS=Arabidopsis thaliana OX=3702 GN=At2g02510 PE=3 SV=1;sp|Q9M9R9|NDB3B_ARATH NADH dehydrogenase [ubiquinone] 1 beta subcomplex subunit 3-B OS=Arabidopsis thaliana OX=3702 G	27.3991	27.3646	27.7417	27.5937	28.2196	28.2498	27.9941	27.614		1.55779	-0.494602
0.0277651	0.678014	F17O14.10	sp|Q9C9Z3|RER2_ARATH Protein RETICULATA-RELATED 2, chloroplastic OS=Arabidopsis thaliana OX=3702 GN=RER2 PE=2 SV=1	24.2742	24.9859	24.9608	25.0295	25.3743	25.1797	25.5299	25.4089		1.5565	-0.560613
0.0278135	0.965433	GRF8	sp|P48348|14338_ARATH 14-3-3-like protein GF14 kappa OS=Arabidopsis thaliana OX=3702 GN=GRF8 PE=1 SV=2	29.597	29.5879	29.5724	29.5664	29.5979	29.6568	29.6105	29.6616		1.55574	-0.0507512
0.0278625	1.21363	MKK2	sp|Q9S7U9|M2K2_ARATH Mitogen-activated protein kinase kinase 2 OS=Arabidopsis thaliana OX=3702 GN=MKK2 PE=1 SV=2	26.5787	26.4833	26.579	26.4753	26.2931	26.4811	26.0437	26.1813		1.55498	0.279324
0.0279179	1.21838	KIN11	sp|P92958|KIN11_ARATH SNF1-related protein kinase catalytic subunit alpha KIN11 OS=Arabidopsis thaliana OX=3702 GN=KIN11 PE=1 SV=1	25.3203	25.5241	25.3644	25.4419	25.3404	25.2024	24.9623	25.0057		1.55412	0.284961
0.0279191	1.12635	TRN1	sp|Q8H0U4|TNPO1_ARATH Transportin-1 OS=Arabidopsis thaliana OX=3702 GN=TRN1 PE=1 SV=1	28.9191	28.9151	28.8642	28.8303	28.7504	28.8055	28.55	28.7363		1.5541	0.171652
0.0280902	0.78062	ALY2	sp|Q8L719|THO4B_ARATH THO complex subunit 4B OS=Arabidopsis thaliana OX=3702 GN=ALY2 PE=1 SV=1	26.9	26.6146	26.4599	26.6071	27.0122	27.2347	26.887	26.8768		1.55145	-0.357308
0.0282746	1.10515	MPK6	sp|Q39026|MPK6_ARATH Mitogen-activated protein kinase 6 OS=Arabidopsis thaliana OX=3702 GN=MPK6 PE=1 SV=1	27.8824	27.7706	27.8265	27.9121	27.6938	27.686	27.8115	27.6233		1.5486	0.144246
0.028481	0.740683	CPN60A1	sp|P21238|CPNA1_ARATH Chaperonin 60 subunit alpha 1, chloroplastic OS=Arabidopsis thaliana OX=3702 GN=CPN60A1 PE=1 SV=2	28.9565	28.9379	28.7936	29.0897	29.1405	29.2142	29.76	29.3952		1.54545	-0.433071
0.0287649	1.11981	RPN11	sp|Q9LT08|PSDE_ARATH 26S proteasome non-ATPase regulatory subunit 14 homolog OS=Arabidopsis thaliana OX=3702 GN=RPN11 PE=1 SV=1	29.111	29.1593	29.1102	29.0175	28.9451	29.0236	28.7981	28.978		1.54114	0.163259
0.0287653	0.927888	LYSA2	sp|Q94A94|DCDA2_ARATH Diaminopimelate decarboxylase 2, chloroplastic OS=Arabidopsis thaliana OX=3702 GN=LYSA2 PE=1 SV=1	29.1529	29.2533	29.2346	29.1409	29.361	29.2557	29.2685	29.3284		1.54113	-0.107977
0.0287925	1.15822	PAL1	sp|P35510|PAL1_ARATH Phenylalanine ammonia-lyase 1 OS=Arabidopsis thaliana OX=3702 GN=PAL1 PE=1 SV=3	30.1774	30.262	30.1887	30.2439	29.9821	30.1534	29.8202	30.0687		1.54072	0.211904
0.0290333	0.722278	MORF9	sp|Q9LPZ1|MORF9_ARATH Multiple organellar RNA editing factor 9, chloroplastic OS=Arabidopsis thaliana OX=3702 GN=MORF9 PE=1 SV=1	25.7962	25.8105	25.7757	25.9136	26.0256	26.1132	26.7506	26.284		1.5371	-0.469375
0.0290884	1.16373	RGTA1	sp|Q8VYB7|PGTA1_ARATH Geranylgeranyl transferase type-2 subunit alpha 1 OS=Arabidopsis thaliana OX=3702 GN=RGTA1 PE=1 SV=1	26.5254	26.4258	26.3929	26.616	26.2564	26.2848	26.1314	26.4125		1.53628	0.218753
0.0292531	0.831005	PNP2	sp|Q9S7G6|PNP2_ARATH Polyribonucleotide nucleotidyltransferase 2, mitochondrial OS=Arabidopsis thaliana OX=3702 GN=PNP2 PE=2 SV=1	25.7492	25.7476	25.547	25.7075	25.9812	26.078	25.7206	26.0398		1.53383	-0.267072
0.0292595	0.7008	ADK	sp|Q9ZUU1|KAD1_ARATH Adenylate kinase 1, chloroplastic OS=Arabidopsis thaliana OX=3702 GN=ADK PE=1 SV=1	26.6657	26.4453	26.5602	26.8098	27.1081	27.4209	26.6863	27.3174		1.53373	-0.512925
0.0293439	1.43084	UGT91A1	sp|Q940V3|U91A1_ARATH UDP-glycosyltransferase 91A1 OS=Arabidopsis thaliana OX=3702 GN=UGT91A1 PE=2 SV=1	25.9227	26.29	25.745	25.6912	25.6101	25.6003	25.1816	25.1894		1.53248	0.516863
0.0294316	1.24215	NUDT1	sp|Q9CA40|NUDT1_ARATH Nudix hydrolase 1 OS=Arabidopsis thaliana OX=3702 GN=NUDT1 PE=1 SV=1	26.557	26.7483	26.4014	26.366	26.3249	26.2937	26.1731	26.0296		1.53119	0.312844
0.0295102	0.85164		sp|Q8RXF1|SF3A1_ARATH Probable splicing factor 3A subunit 1 OS=Arabidopsis thaliana OX=3702 GN=At1g14650 PE=1 SV=2	26.5199	26.2721	26.4501	26.3694	26.6521	26.7907	26.4935	26.602		1.53003	-0.231685
0.029665	0.904229	PRP19B	sp|O22785|PR19B_ARATH Pre-mRNA-processing factor 19 homolog 2 OS=Arabidopsis thaliana OX=3702 GN=PRP19B PE=1 SV=3	26.8723	26.7058	26.8704	26.8769	26.972	26.9155	26.9621	27.0568		1.52776	-0.14524
0.0297922	0.7808	RPL9D	sp|Q9SZX9|RL92_ARATH 60S ribosomal protein L9-2 OS=Arabidopsis thaliana OX=3702 GN=RPL9D PE=2 SV=1	26.981	27.3087	27.0802	27.4352	27.4312	27.474	27.5762	27.7516		1.5259	-0.356976
0.0297986	0.795619	U1A	sp|Q39244|RU1A_ARATH U1 small nuclear ribonucleoprotein A OS=Arabidopsis thaliana OX=3702 GN=U1A PE=1 SV=1	25.7775	25.646	25.5521	25.9242	26.0555	26.2227	25.8264	26.1146		1.5258	-0.32985
0.030039	0.805649	HSP70-7	sp|Q9LTX9|HSP7G_ARATH Heat shock 70 kDa protein 7, chloroplastic OS=Arabidopsis thaliana OX=3702 GN=HSP70-7 PE=2 SV=1	27.5004	27.4288	27.3676	27.6907	27.7546	27.6084	28.012	27.8595		1.52232	-0.311777
0.0304072	0.853471	NOP5-1	sp|O04658|NOP5A_ARATH Probable nucleolar protein 5-1 OS=Arabidopsis thaliana OX=3702 GN=NOP5-1 PE=1 SV=2	27.4595	27.431	27.2304	27.4196	27.6065	27.6014	27.4722	27.7747		1.51702	-0.228585
0.0304292	0.848894	RPS11B	sp|O65569|RS112_ARATH 40S ribosomal protein S11-2 OS=Arabidopsis thaliana OX=3702 GN=RPS11B PE=2 SV=2	26.8448	26.6925	26.7193	26.9526	27.2101	26.986	26.949	27.0095		1.51671	-0.236344
0.0307125	1.12162	ADH2	sp|Q96533|ADHX_ARATH Alcohol dehydrogenase class-3 OS=Arabidopsis thaliana OX=3702 GN=ADH2 PE=1 SV=2	29.9512	30.0065	29.9909	29.8068	29.8244	29.8337	29.7637	29.6713		1.51269	0.165582
0.0308071	1.14479	FHY	sp|Q84MD8|FHYRK_ARATH Bifunctional riboflavin kinase/FMN phosphatase OS=Arabidopsis thaliana OX=3702 GN=FHY PE=1 SV=1	26.0529	26.0709	26.2095	25.9496	25.9441	25.7565	25.8591	25.9428		1.51135	0.195083
0.0308177	0.902176		sp|Q9M8T0|Y3288_ARATH Probable inactive receptor kinase At3g02880 OS=Arabidopsis thaliana OX=3702 GN=At3g02880 PE=1 SV=1	27.6011	27.6674	27.5562	27.5939	27.7447	27.8303	27.622	27.8157		1.5112	-0.148519
0.0308441	0.78626	CYP83A1	sp|P48421|C83A1_ARATH Cytochrome P450 83A1 OS=Arabidopsis thaliana OX=3702 GN=CYP83A1 PE=1 SV=2	26.2127	25.8583	25.6817	26.0383	26.2684	26.2103	26.2723	26.4277		1.51083	-0.346921
0.0308979	1.12326	BIG	sp|Q9SRU2|BIG_ARATH Auxin transport protein BIG OS=Arabidopsis thaliana OX=3702 GN=BIG PE=1 SV=2	28.0958	28.2723	28.1632	28.1124	27.9839	28	27.8856	28.1033		1.51007	0.167697
0.030903	0.910166	OVA2	sp|Q8RXK8|SYIM_ARATH Isoleucine--tRNA ligase, chloroplastic/mitochondrial OS=Arabidopsis thaliana OX=3702 GN=OVA2 PE=2 SV=1	26.7892	26.8767	26.7585	26.7839	26.9445	26.9439	27.0315	26.8316		1.51	-0.135798
0.0310715	0.847888		sp|Q9ZPV5|NOC2L_ARATH Nucleolar complex protein 2 homolog OS=Arabidopsis thaliana OX=3702 GN=At2g18220 PE=3 SV=2	24.7674	24.7359	24.7441	24.6886	25.0596	25.1291	24.7471	24.9525		1.50764	-0.238054
0.0310768	1.09869	ACT7	sp|P53492|ACT7_ARATH Actin-7 OS=Arabidopsis thaliana OX=3702 GN=ACT7 PE=1 SV=1	32.1576	32.1663	32.0871	32.1131	32.0487	32.0622	31.8665	32.0035		1.50756	0.135779
0.0312156	0.811217	F19C24.3	sp|Q9C8I6|IOS1_ARATH LRR receptor-like serine/threonine-protein kinase IOS1 OS=Arabidopsis thaliana OX=3702 GN=IOS1 PE=1 SV=1	25.7866	25.9361	26.0265	25.9382	26.3622	26.4057	26.1187	26.008		1.50563	-0.301839
0.0313404	1.11987	ERDJ2A	sp|Q0WT48|DNJ21_ARATH DnaJ protein ERDJ2A OS=Arabidopsis thaliana OX=3702 GN=ERDJ2A PE=1 SV=1	27.804	27.8808	27.8314	27.7663	27.7661	27.7081	27.519	27.636		1.5039	0.163334
0.0313675	1.09945	RPN1A	sp|Q9SIV2|PSD2A_ARATH 26S proteasome non-ATPase regulatory subunit 2 homolog A OS=Arabidopsis thaliana OX=3702 GN=RPN1A PE=1 SV=2	29.9017	29.8875	29.8073	29.8099	29.7262	29.7458	29.5955	29.7917		1.50352	0.136782
0.0313945	0.890715	CLC2	sp|O04209|CLC2_ARATH Clathrin light chain 2 OS=Arabidopsis thaliana OX=3702 GN=CLC2 PE=1 SV=1	28.0812	28.0215	28.1442	28.0642	28.3844	28.2631	28.2028	28.1287		1.50315	-0.166965
0.0313981	1.1888	CCT6B	sp|Q8L7N0|TCPZB_ARATH T-complex protein 1 subunit zeta 2 OS=Arabidopsis thaliana OX=3702 GN=CCT6B PE=1 SV=1	27.3149	27.4572	27.3719	27.4177	27.2938	27.1158	26.9154	27.2387		1.5031	0.249512
0.0314355	1.24557	IPUT1	sp|Q8GWB7|GUX6_ARATH Inositol phosphorylceramide glucuronosyltransferase 1 OS=Arabidopsis thaliana OX=3702 GN=IPUT1 PE=1 SV=1	27.353	27.1935	27.0137	26.959	26.7129	26.7917	26.7323	27.0151		1.50258	0.31681
0.0317547	1.33071	AMC1	sp|Q7XJE6|MCA1_ARATH Metacaspase-1 OS=Arabidopsis thaliana OX=3702 GN=AMC1 PE=1 SV=1	24.9844	24.9349	25.0653	25.2397	24.698	24.2731	24.7059	24.8985		1.49819	0.412197
0.0319309	1.19561		sp|Q8H1F4|COPZ3_ARATH Coatomer subunit zeta-3 OS=Arabidopsis thaliana OX=3702 GN=At4g08520 PE=2 SV=1	28.3245	28.1959	28.3275	28.3513	28.0944	28.0469	27.8088	28.2183		1.49579	0.257743
0.0319457	0.891042	OTC	sp|O50039|OTC_ARATH Ornithine transcarbamylase, chloroplastic OS=Arabidopsis thaliana OX=3702 GN=OTC PE=1 SV=2	28.4394	28.5243	28.3698	28.4765	28.7116	28.6321	28.4769	28.6551		1.49559	-0.166435
0.0320301	1.26933	TIC32	sp|A2RVM0|TIC32_ARATH Short-chain dehydrogenase TIC 32, chloroplastic OS=Arabidopsis thaliana OX=3702 GN=TIC32 PE=2 SV=1	28.6357	28.7734	28.7713	28.4772	28.2839	28.5359	28.4053	28.0563		1.49444	0.344069
0.0320718	0.873183	DHAD	sp|Q9LIR4|ILVD_ARATH Dihydroxy-acid dehydratase, chloroplastic OS=Arabidopsis thaliana OX=3702 GN=DHAD PE=1 SV=1	28.0903	28.04	28.0816	28.2306	28.2989	28.2714	28.192	28.4629		1.49388	-0.195645
0.0320746	1.11629	ACO1	sp|Q42560|ACO1_ARATH Aconitate hydratase 1 OS=Arabidopsis thaliana OX=3702 GN=ACO1 PE=1 SV=2	30.1865	30.2906	30.1554	30.2406	30.0709	30.104	29.9203	30.1431		1.49384	0.158716
0.032132	1.13373	CCT8	sp|Q94K05|TCPQ_ARATH T-complex protein 1 subunit theta OS=Arabidopsis thaliana OX=3702 GN=CCT8 PE=1 SV=1	29.6533	29.6102	29.5293	29.6369	29.4398	29.4548	29.2639	29.547		1.49306	0.181082
0.0321603	1.13215	MP3	sp|Q9SK39|SBP3_ARATH Probable steroid-binding protein 3 OS=Arabidopsis thaliana OX=3702 GN=MP3 PE=1 SV=1	30.4517	30.2247	30.3399	30.3498	30.192	30.2466	30.1751	30.0362		1.49268	0.17906
0.0322157	0.89281	NDPK3	sp|O49203|NDK3_ARATH Nucleoside diphosphate kinase III, chloroplastic/mitochondrial OS=Arabidopsis thaliana OX=3702 GN=NDPK3 PE=1 SV=1	30.9315	30.9331	30.864	31.0245	31.1098	31.2091	30.9719	31.1166		1.49193	-0.163574
0.0323945	1.45351	NSP1	sp|Q9SDM9|JAL28_ARATH Nitrile-specifier protein 1 OS=Arabidopsis thaliana OX=3702 GN=NSP1 PE=1 SV=2	30.9237	30.944	30.7607	30.4051	30.4767	29.96	30.479	29.9595		1.48953	0.539544
0.0324631	0.761921		sp|P41568|SUI11_ARATH Protein translation factor SUI1 homolog 1 OS=Arabidopsis thaliana OX=3702 GN=At4g27130 PE=1 SV=2;sp|Q94JV4|SUI12_ARATH Protein translation factor SUI1 homolog 2 OS=Arabidopsis thaliana OX=3702 GN=At1g54290 PE=3 SV=1	27.2334	26.6029	26.9395	27.0234	27.1901	27.4239	27.3437	27.4107		1.48861	-0.392287
0.0324834	0.848572		sp|Q8GW78|CLPT2_ARATH ATP-dependent Clp protease ATP-binding subunit CLPT2, chloroplastic OS=Arabidopsis thaliana OX=3702 GN=CLPT2 PE=1 SV=1	26.0925	26.0002	25.8719	26.1263	26.2268	26.2774	26.4212	26.113		1.48834	-0.23689
0.0325222	1.14637	CCT3	sp|Q84WV1|TCPG_ARATH T-complex protein 1 subunit gamma OS=Arabidopsis thaliana OX=3702 GN=CCT3 PE=1 SV=1	29.232	29.2709	29.2145	29.2865	29.1345	29.068	28.8544	29.1587		1.48782	0.197068
0.03272	0.722829	FATA2	sp|Q9SV64|FATA2_ARATH Oleoyl-acyl carrier protein thioesterase 2, chloroplastic OS=Arabidopsis thaliana OX=3702 GN=FATA2 PE=2 SV=1	25.773	25.9752	25.7627	25.7883	26.7305	26.129	25.9854	26.3275		1.48519	-0.468275
0.0331796	1.44767	PCKA	sp|Q9T074|PCKA1_ARATH Phosphoenolpyruvate carboxykinase (ATP) 1 OS=Arabidopsis thaliana OX=3702 GN=PCK1 PE=1 SV=1	30.0922	30.1918	30.3955	29.6579	29.6572	29.598	29.7339	29.2134		1.47913	0.533729
0.033306	0.759603	UMK2	sp|Q6NMK6|KCY2_ARATH Probable UMP-CMP kinase 2 OS=Arabidopsis thaliana OX=3702 GN=UMK2 PE=2 SV=2	25.7882	25.8976	26.0344	26.042	26.3432	26.6186	25.9873	26.3998		1.47748	-0.396682
0.0333391	0.856396	GAPCP2	sp|Q5E924|G3PP2_ARATH Glyceraldehyde-3-phosphate dehydrogenase GAPCP2, chloroplastic OS=Arabidopsis thaliana OX=3702 GN=GAPCP2 PE=2 SV=1	27.1542	27.1539	27.3064	27.2844	27.4672	27.4835	27.2539	27.5891		1.47705	-0.22365
0.0333425	0.830209	PERK1	sp|Q9LV48|PERK1_ARATH Proline-rich receptor-like protein kinase PERK1 OS=Arabidopsis thaliana OX=3702 GN=PERK1 PE=1 SV=1	26.2629	26.1865	25.895	26.1385	26.2745	26.5442	26.3506	26.3875		1.477	-0.268454
0.0333833	1.18495	HMT-2	sp|Q9M1W4|HMT2_ARATH Homocysteine S-methyltransferase 2 OS=Arabidopsis thaliana OX=3702 GN=HMT-2 PE=1 SV=1	26.8839	26.7041	26.7917	26.9535	26.7274	26.6202	26.3914	26.6148		1.47647	0.244826
0.0336032	0.888006	F9P14.8;At5g25230	sp|F4JWP9|GFL_ARATH 109 kDa U5 small nuclear ribonucleoprotein component GFL OS=Arabidopsis thaliana OX=3702 GN=GFL PE=2 SV=1;sp|Q9LNC5|CLO_ARATH 110 kDa U5 small nuclear ribonucleoprotein component CLO OS=Arabidopsis thaliana OX=3702 GN=CLO PE=1 SV=1	26.6378	26.4339	26.4388	26.3952	26.6178	26.6082	26.6274	26.7376		1.47362	-0.171359
0.033634	1.15833	F12F1.32	sp|O65398|GLX1_ARATH Lactoylglutathione lyase GLX1 OS=Arabidopsis thaliana OX=3702 GN=GLX1 PE=1 SV=1	30.9503	30.9392	30.7492	30.7716	30.7609	30.7048	30.5779	30.5184		1.47322	0.212048
0.0338892	1.30064	KCR1	sp|Q8L9C4|KCR1_ARATH Very-long-chain 3-oxoacyl-CoA reductase 1 OS=Arabidopsis thaliana OX=3702 GN=KCR1 PE=1 SV=1	29.3698	29.5129	29.2496	29.2698	29.0038	29.0465	28.6221	29.2128		1.46994	0.379223
0.0339709	1.16137	ALAAT1	sp|F4I7I0|ALAT1_ARATH Alanine aminotransferase 1, mitochondrial OS=Arabidopsis thaliana OX=3702 GN=ALAAT1 PE=1 SV=1	29.4457	29.5724	29.6595	29.3495	29.3613	29.3291	29.2931	29.1803		1.46889	0.215822
0.0341217	1.08404	At1g09620	sp|F4I116|SYLC_ARATH Leucine--tRNA ligase, cytoplasmic OS=Arabidopsis thaliana OX=3702 GN=At1g09620 PE=1 SV=1	28.3432	28.3668	28.3435	28.3195	28.2721	28.2374	28.1068	28.291		1.46697	0.116424
0.0341351	1.28906		sp|Q9LM93|DPM1_ARATH Dolichol-phosphate mannosyltransferase subunit 1 OS=Arabidopsis thaliana OX=3702 GN=DPMS1 PE=1 SV=1	26.1456	26.299	25.8587	26.175	25.7353	25.7705	25.5178	25.9895		1.4668	0.366322
0.0342666	1.15221	RH6	sp|Q94BV4|RH6_ARATH DEAD-box ATP-dependent RNA helicase 6 OS=Arabidopsis thaliana OX=3702 GN=RH6 PE=2 SV=2	25.4729	25.6105	25.5186	25.3703	25.1792	25.2765	25.2548	25.4441		1.46513	0.204401
0.0343025	0.821272		sp|Q8H1H9|AMO_ARATH Primary amine oxidase OS=Arabidopsis thaliana OX=3702 GN=At1g62810 PE=2 SV=1	25.3976	25.6298	25.3696	25.5656	25.9162	25.7421	25.5547	25.8859		1.46467	-0.284068
0.0343587	0.720966	EXPB1	sp|Q9SKU2|EXPB1_ARATH Expansin-B1 OS=Arabidopsis thaliana OX=3702 GN=EXPB1 PE=2 SV=1	25.0263	24.7551	24.7483	24.572	25.108	25.5763	24.9196	25.3859		1.46396	-0.471997
0.0343826	0.880705		sp|Q96251|ATPO_ARATH ATP synthase subunit O, mitochondrial OS=Arabidopsis thaliana OX=3702 GN=At5g13450 PE=1 SV=2	29.7286	29.8286	29.7694	29.8873	29.9765	30.1381	29.8576	29.9747		1.46366	-0.183269
0.034525	1.26673	PDIL2-2	sp|Q9MAU6|PDI22_ARATH Protein disulfide-isomerase like 2-2 OS=Arabidopsis thaliana OX=3702 GN=PDIL2-2 PE=2 SV=2	26.7425	26.8125	26.7021	26.8121	26.4169	26.1643	26.3694	26.7542		1.46187	0.341104
0.0345572	1.18892	AKR4C8	sp|O80944|AKRC8_ARATH Aldo-keto reductase family 4 member C8 OS=Arabidopsis thaliana OX=3702 GN=AKR4C8 PE=1 SV=2	29.2214	29.2939	29.4333	29.0592	29.147	28.9557	28.9649	28.9415		1.46146	0.249646
0.0346	0.862742	NFD5	sp|Q8LEZ4|NFD5_ARATH Protein NUCLEAR FUSION DEFECTIVE 5, mitochondrial OS=Arabidopsis thaliana OX=3702 GN=NFD5 PE=2 SV=1	26.2814	26.3653	26.2679	26.2485	26.4328	26.6749	26.3391	26.5682		1.46092	-0.212998
0.034779	0.861236	ADT2	sp|Q9SSE7|AROD2_ARATH Arogenate dehydratase/prephenate dehydratase 2, chloroplastic OS=Arabidopsis thaliana OX=3702 GN=ADT2 PE=1 SV=1	25.9496	25.7602	25.8437	26.0888	26.0314	26.1397	26.13	26.2032		1.45868	-0.215519
0.0347877	1.20721	RH37	sp|Q84W89|RH37_ARATH DEAD-box ATP-dependent RNA helicase 37 OS=Arabidopsis thaliana OX=3702 GN=RH37 PE=2 SV=2	26.7501	26.8825	26.8336	26.74	26.53	26.5176	26.306	26.7659		1.45857	0.27168
0.0348407	1.11823	KIN10	sp|Q38997|KIN10_ARATH SNF1-related protein kinase catalytic subunit alpha KIN10 OS=Arabidopsis thaliana OX=3702 GN=KIN10 PE=1 SV=3	26.6988	26.7907	26.6736	26.6777	26.5078	26.4365	26.6855	26.5662		1.45791	0.161211
0.0349791	1.26698	LEA14	sp|O03983|LEA14_ARATH Probable desiccation-related protein LEA14 OS=Arabidopsis thaliana OX=3702 GN=LEA14 PE=1 SV=1	27.1301	27.3371	27.022	27.2205	26.945	27.0422	26.5514	26.8054		1.45619	0.341394
0.0350372	1.29179	GPX3	sp|O22850|GPX3_ARATH Probable glutathione peroxidase 3, mitochondrial OS=Arabidopsis thaliana OX=3702 GN=GPX3 PE=1 SV=1	25.6008	25.936	25.3832	25.5988	25.3596	25.3313	25.0393	25.3112		1.45547	0.369366
0.0350404	1.14075	PBF1	sp|P42742|PSB1_ARATH Proteasome subunit beta type-1 OS=Arabidopsis thaliana OX=3702 GN=PBF1 PE=1 SV=2	29.3886	29.4144	29.3365	29.2654	29.1457	29.2611	28.9923	29.246		1.45543	0.189988
0.03521	1.19808	PAL2	sp|P45724|PAL2_ARATH Phenylalanine ammonia-lyase 2 OS=Arabidopsis thaliana OX=3702 GN=PAL2 PE=1 SV=2	28.7389	28.702	28.8297	28.52	28.4233	28.6398	28.3677	28.317		1.45333	0.260729
0.0353928	0.779606	SCL30A	sp|Q9LHP2|SL30A_ARATH Serine/arginine-rich SC35-like splicing factor SCL30A OS=Arabidopsis thaliana OX=3702 GN=SCL30A PE=1 SV=1	25.7234	25.6201	25.801	26.031	26.3733	26.0239	25.9479	26.2671		1.45108	-0.359183
0.0354585	0.798795	CBSDUF6	sp|Q8VZI2|Y4370_ARATH DUF21 domain-containing protein At4g33700 OS=Arabidopsis thaliana OX=3702 GN=CBSDUF6 PE=1 SV=1	24.251	24.0292	24.0532	24.1644	24.2238	24.3386	24.5105	24.7213		1.45028	-0.324103
0.0354592	1.19701	WAV2	sp|Q8RXP6|WAV2_ARATH Alpha/beta hydrolase domain-containing protein WAV2 OS=Arabidopsis thaliana OX=3702 GN=WAV2 PE=2 SV=1	25.4553	25.5876	25.2675	25.4119	25.2498	25.2886	24.9752	25.1708		1.45027	0.259436
0.0358239	1.27454	RTNLB3	sp|Q9SH59|RTNLC_ARATH Reticulon-like protein B3 OS=Arabidopsis thaliana OX=3702 GN=RTNLB3 PE=2 SV=1	28.2239	28.3427	28.2756	28.3755	28.0936	27.8628	27.6481	28.2133		1.44583	0.349975
0.0359296	1.25724	PURA1	sp|Q9SKZ1|PUR_ARATH Transcription factor Pur-alpha 1 OS=Arabidopsis thaliana OX=3702 GN=PURA1 PE=1 SV=2	27.1223	27.2772	27.255	26.9963	27.0938	26.8901	26.7325	26.6134		1.44455	0.330259
0.0360645	1.1946	PDR2	sp|Q9LT02|PDR2_ARATH Probable manganese-transporting ATPase PDR2 OS=Arabidopsis thaliana OX=3702 GN=PDR2 PE=1 SV=1	27.1935	27.2604	27.0637	27.2122	27.0167	26.9953	26.6697	27.0221		1.44292	0.256533
0.0362151	1.07253	ABCE2	sp|Q8LPJ4|AB2E_ARATH ABC transporter E family member 2 OS=Arabidopsis thaliana OX=3702 GN=ABCE2 PE=2 SV=1	28.2061	28.2443	28.1414	28.1809	28.112	28.1153	28.0017	28.1396		1.44111	0.10102
0.0362983	1.10981	aare	sp|Q84LM4|AARE_ARATH Acylamino-acid-releasing enzyme OS=Arabidopsis thaliana OX=3702 GN=AARE PE=1 SV=1	27.0107	26.9926	26.9439	26.9649	26.9162	26.7375	26.731	26.9261		1.44011	0.150315
0.0365012	1.09548	GRF4	sp|P46077|14334_ARATH 14-3-3-like protein GF14 phi OS=Arabidopsis thaliana OX=3702 GN=GRF4 PE=1 SV=2	30.2866	30.1427	30.1648	30.1816	30.1146	30.1237	29.9622	30.049		1.43769	0.131566
0.0365756	1.0749	BAG7	sp|Q9LVA0|BAG7_ARATH BAG family molecular chaperone regulator 7 OS=Arabidopsis thaliana OX=3702 GN=BAG7 PE=1 SV=1	28.494	28.4793	28.3906	28.4446	28.2968	28.4111	28.2911	28.3925		1.43681	0.104202
0.0368365	0.742107	F6G17.60	sp|Q9SZU1|C81F4_ARATH Cytochrome P450 81F4 OS=Arabidopsis thaliana OX=3702 GN=CYP81F4 PE=1 SV=1	26.7725	26.5373	26.3816	26.1373	27.0773	26.8931	26.9342	26.6454		1.43372	-0.430301
0.0368423	0.910811	At1g53210	sp|Q8L636|NCL_ARATH Sodium/calcium exchanger NCL OS=Arabidopsis thaliana OX=3702 GN=NCL PE=2 SV=1	27.3359	27.4594	27.4748	27.4973	27.5823	27.5524	27.5023	27.6697		1.43365	-0.134776
0.0369321	0.85549	BFRUCT3	sp|Q43348|INVA3_ARATH Acid beta-fructofuranosidase 3, vacuolar OS=Arabidopsis thaliana OX=3702 GN=BFRUCT3 PE=2 SV=1	29.7747	29.9153	30.0264	29.8567	30.2008	30.2551	29.976	30.0419		1.4326	-0.225176
0.0369656	0.892319	DAPF	sp|Q9LFG2|DAPF_ARATH Diaminopimelate epimerase, chloroplastic OS=Arabidopsis thaliana OX=3702 GN=DAPF PE=1 SV=1	27.3332	27.4477	27.3413	27.5781	27.5886	27.5281	27.6072	27.6339		1.4322	-0.164369
0.036981	1.12727	ATR2	sp|Q9SUM3|NCPR2_ARATH NADPH--cytochrome P450 reductase 2 OS=Arabidopsis thaliana OX=3702 GN=ATR2 PE=1 SV=1	27.0685	27.0147	27.0123	26.8839	26.791	26.8689	26.6946	26.9335		1.43202	0.172837
0.037118	0.791782		sp|Q9SEU8|TRXM2_ARATH Thioredoxin M2, chloroplastic OS=Arabidopsis thaliana OX=3702 GN=TRXM2 PE=1 SV=2	28.0014	27.9102	27.7999	28.0527	28.1216	28.4312	28.5099	28.0487		1.43041	-0.336824
0.0372388	0.913944	ACA8	sp|Q9LF79|ACA8_ARATH Calcium-transporting ATPase 8, plasma membrane-type OS=Arabidopsis thaliana OX=3702 GN=ACA8 PE=1 SV=1	26.9697	26.9956	26.8686	26.9431	27.1711	27.0003	27.016	27.1089		1.429	-0.129822
0.0373016	0.878471	CYP71	sp|Q8W4D0|CPY71_ARATH Peptidyl-prolyl cis-trans isomerase CYP71 OS=Arabidopsis thaliana OX=3702 GN=CYP71 PE=1 SV=1	24.8242	24.7483	24.8428	24.6498	24.8444	24.9758	24.8965	25.096		1.42827	-0.186934
0.0374051	1.54853	SUS3	sp|Q9M111|SUS3_ARATH Sucrose synthase 3 OS=Arabidopsis thaliana OX=3702 GN=SUS3 PE=1 SV=1	27.0025	27.2918	27.3603	26.4657	26.5769	26.3402	26.5996	26.0801		1.42707	0.630898
0.0375059	1.12319	AIP3	sp|Q9M4B5|PFD4_ARATH Probable prefoldin subunit 4 OS=Arabidopsis thaliana OX=3702 GN=AIP3 PE=1 SV=3	26.6462	26.8813	26.7557	26.7809	26.542	26.619	26.5287	26.7041		1.4259	0.167596
0.0375319	1.15012	LCB1	sp|Q94IB8|LCB1_ARATH Long chain base biosynthesis protein 1 OS=Arabidopsis thaliana OX=3702 GN=LCB1 PE=1 SV=1	26.921	27.1531	26.9187	26.8673	26.7833	26.8173	26.8098	26.6425		1.4256	0.201784
0.0375504	0.801857	RPL35AD	sp|P51422|R35A4_ARATH 60S ribosomal protein L35a-4 OS=Arabidopsis thaliana OX=3702 GN=RPL35AD PE=3 SV=2	29.6011	29.6389	29.4547	29.6732	29.7605	30.2313	29.8726	29.7778		1.42539	-0.318584
0.0375561	1.08194		sp|Q8LPN7|RNG1L_ARATH E3 ubiquitin-protein ligase RING1-like OS=Arabidopsis thaliana OX=3702 GN=At3g19950 PE=1 SV=1	27.1091	27.1173	27.0827	27.1761	27.0181	27.0021	26.9129	27.0978		1.42532	0.113615
0.0375936	1.14123		sp|Q9C827|COB22_ARATH Coatomer subunit beta-2 OS=Arabidopsis thaliana OX=3702 GN=At1g52360 PE=1 SV=1	28.909	28.8698	28.8104	28.8864	28.7488	28.6684	28.4908	28.8051		1.42489	0.190593
0.0379348	1.14743	PLDGAMMA1	sp|Q9T053|PLDG1_ARATH Phospholipase D gamma 1 OS=Arabidopsis thaliana OX=3702 GN=PLDGAMMA1 PE=1 SV=1	26.2948	26.2945	26.2447	26.0503	26.0973	26.0494	26.0591	25.8847		1.42096	0.198409
0.0380488	1.07011	RPS27AC;RPS27AB;RPS27AA;RPL40B;RPL40A;UBQ11;UBQ12;UBQ14;UBQ3;UBQ4;UBQ10	sp|P59232|R27AB_ARATH Ubiquitin-40S ribosomal protein S27a-2 OS=Arabidopsis thaliana OX=3702 GN=RPS27AB PE=2 SV=2;sp|P59233|R27AC_ARATH Ubiquitin-40S ribosomal protein S27a-3 OS=Arabidopsis thaliana OX=3702 GN=RPS27AC PE=2 SV=2;sp|P59271|R27AA_ARATH Ubiqui	31.8919	31.9433	31.8939	31.8139	31.7744	31.726	31.8469	31.8046		1.41966	0.0977612
0.0383426	0.621641		sp|Q94C60|SPT42_ARATH Transcription elongation factor SPT4 homolog 2 OS=Arabidopsis thaliana OX=3702 GN=At5g63670 PE=1 SV=1	24.2058	23.4025	23.6093	24.4621	24.5346	24.7984	24.45	24.64		1.41632	-0.685846
0.0383457	1.18495	BGLU22	sp|Q9C8Y9|BGL22_ARATH Beta-glucosidase 22 OS=Arabidopsis thaliana OX=3702 GN=BGLU22 PE=1 SV=1	30.1951	30.2417	29.9856	30.037	29.951	29.7791	29.7288	30.0212		1.41628	0.244827
0.0383958	1.22165	NMT2	sp|Q944H0|PEAM2_ARATH Phosphomethylethanolamine N-methyltransferase OS=Arabidopsis thaliana OX=3702 GN=NMT2 PE=1 SV=2	29.9669	29.9007	30.0321	29.6672	29.8048	29.5649	29.5977	29.4441		1.41572	0.288827
0.0384686	0.606481	ALA1	sp|P98204|ALA1_ARATH Phospholipid-transporting ATPase 1 OS=Arabidopsis thaliana OX=3702 GN=ALA1 PE=2 SV=1	23.0813	23.3294	24.0606	24.1103	24.3095	24.3959	24.1759	24.5861		1.41489	-0.721466
0.0390243	0.778668	FER4	sp|Q9S756|FRI4_ARATH Ferritin-4, chloroplastic OS=Arabidopsis thaliana OX=3702 GN=FER4 PE=2 SV=1	26.244	26.0915	26.2144	26.2564	26.2645	26.4522	26.8771	26.6562		1.40866	-0.360919
0.0390916	1.21857	UKL4	sp|O65583|UKL4_ARATH Uridine kinase-like protein 4 OS=Arabidopsis thaliana OX=3702 GN=UKL4 PE=2 SV=2	26.0726	26.0594	26.1308	26.3864	25.8447	25.8335	25.7341	26.0961		1.40792	0.285184
0.0392328	0.853335	SBT1.7	sp|O65351|SBT17_ARATH Subtilisin-like protease SBT1.7 OS=Arabidopsis thaliana OX=3702 GN=SBT1.7 PE=1 SV=1	27.5365	27.4481	27.3969	27.4758	27.6048	27.5497	27.9223	27.6958		1.40635	-0.228815
0.0392368	1.25405	PNC2	sp|Q8VZS0|PNC2_ARATH Peroxisomal adenine nucleotide carrier 2 OS=Arabidopsis thaliana OX=3702 GN=PNC2 PE=1 SV=1	25.3486	25.7455	25.5771	25.4952	25.4228	25.2422	24.9715	25.2235		1.40631	0.326595
0.0393172	0.873796	PKP3	sp|Q93Z53|PKP3_ARATH Plastidial pyruvate kinase 3, chloroplastic OS=Arabidopsis thaliana OX=3702 GN=PKP3 PE=1 SV=1	27.0722	26.773	26.9899	26.8565	27.0216	27.1496	27.1459	27.1532		1.40542	-0.194631
0.0396953	0.901494		sp|P50318|PGKH2_ARATH Phosphoglycerate kinase 2, chloroplastic OS=Arabidopsis thaliana OX=3702 GN=At1g56190 PE=1 SV=3	26.2252	26.366	26.2162	26.2804	26.3725	26.5093	26.4863	26.3182		1.40126	-0.14961
0.0399618	1.32062	KTI1	sp|Q8RXD5|KTI4_ARATH Kunitz trypsin inhibitor 4 OS=Arabidopsis thaliana OX=3702 GN=KTI4 PE=2 SV=1	28.6843	28.7518	28.4652	28.6107	28.1342	28.5394	27.8853	28.3481		1.39835	0.401219
0.0402703	0.86308	PECT1	sp|Q9ZVI9|PECT1_ARATH Ethanolamine-phosphate cytidylyltransferase OS=Arabidopsis thaliana OX=3702 GN=PECT1 PE=1 SV=1	25.6315	25.8097	25.6451	25.6904	25.7038	25.9426	26.0326	25.9474		1.39502	-0.212434
0.0403309	1.24848	CUL3A	sp|Q9ZVH4|CUL3A_ARATH Cullin-3A OS=Arabidopsis thaliana OX=3702 GN=CUL3A PE=1 SV=1	25.7155	25.935	25.7205	25.6128	25.5534	25.3918	25.1507	25.6074		1.39436	0.320169
0.0407015	1.42756	OSM34	sp|P50700|OSL3_ARATH Osmotin-like protein OSM34 OS=Arabidopsis thaliana OX=3702 GN=OSM34 PE=2 SV=2	30.9995	30.9163	31.0184	30.7094	30.6224	30.7757	30.2234	29.968		1.39039	0.513548
0.0408179	0.862556	GDPDL3	sp|Q9SZ11|GPDL3_ARATH Glycerophosphodiester phosphodiesterase GDPDL3 OS=Arabidopsis thaliana OX=3702 GN=GDPDL3 PE=2 SV=3	28.5015	28.6141	28.3937	28.5893	28.7558	28.8724	28.5591	28.7646		1.38915	-0.213309
0.0411272	0.759242	RPS2D	sp|Q9SCM3|RS24_ARATH 40S ribosomal protein S2-4 OS=Arabidopsis thaliana OX=3702 GN=RPS2D PE=2 SV=1	25.4369	24.9428	25.3288	25.6009	25.583	25.7893	25.6626	25.8639		1.38587	-0.397368
0.0414698	0.619961	GLL23	sp|Q8W4H8|GDL19_ARATH Inactive GDSL esterase/lipase-like protein 23 OS=Arabidopsis thaliana OX=3702 GN=GLL23 PE=1 SV=1	28.7768	28.9441	28.6106	29.1193	29.1516	29.2348	30.2208	29.6026		1.38227	-0.689751
0.0415539	0.887494	PGDH1	sp|O49485|SERA1_ARATH D-3-phosphoglycerate dehydrogenase 1, chloroplastic OS=Arabidopsis thaliana OX=3702 GN=PGDH1 PE=1 SV=1	30.3118	30.3587	30.3049	30.5174	30.5108	30.6289	30.4358	30.606		1.38139	-0.17219
0.0416691	0.86252	KDSB	sp|Q9C920|KDSB_ARATH 3-deoxy-manno-octulosonate cytidylyltransferase, mitochondrial OS=Arabidopsis thaliana OX=3702 GN=KDSB PE=1 SV=1	26.4343	26.5416	26.7309	26.5348	26.8469	26.641	26.7287	26.8785		1.38019	-0.21337
0.0416849	1.15022	TIF3E1	sp|Q9C5Z3|EIF3E_ARATH Eukaryotic translation initiation factor 3 subunit E OS=Arabidopsis thaliana OX=3702 GN=TIF3E1 PE=1 SV=1	29.2345	29.3019	29.15	29.1917	29.1026	28.9935	28.8273	29.1471		1.38002	0.201905
0.041728	1.11629	T17J13.80	sp|Q9M1R2|SYPC_ARATH Proline--tRNA ligase, cytoplasmic OS=Arabidopsis thaliana OX=3702 GN=At3g62120 PE=1 SV=1	29.0277	29.1522	28.9655	29.0842	28.9334	28.8745	28.7828	29.0042		1.37957	0.158711
0.0418252	1.25032	RPL5B	sp|P49227|RL52_ARATH 60S ribosomal protein L5-2 OS=Arabidopsis thaliana OX=3702 GN=RPL5B PE=2 SV=3	28.8525	28.7609	28.817	28.8388	28.4804	28.1849	28.5279	28.7867		1.37856	0.322299
0.0420688	1.31977	RABD2A	sp|P28188|RAD2A_ARATH Ras-related protein RABD2a OS=Arabidopsis thaliana OX=3702 GN=RABD2A PE=1 SV=3	27.4008	27.3143	27.2882	27.3136	27.0161	27.2528	26.5162	26.9308		1.37604	0.400285
0.0422044	1.34654	AAE17	sp|F4KBF3|AAE17_ARATH Probable acyl-activating enzyme 17, peroxisomal OS=Arabidopsis thaliana OX=3702 GN=AAE17 PE=2 SV=1	25.3795	25.2611	25.3484	25.3646	24.742	24.5619	25.0167	25.3161		1.37464	0.429258
0.0423651	1.12822	UBP14	sp|Q8L6Y1|UBP14_ARATH Ubiquitin carboxyl-terminal hydrolase 14 OS=Arabidopsis thaliana OX=3702 GN=UBP14 PE=1 SV=1	27.8138	27.9247	27.8148	27.7459	27.6465	27.7326	27.4917	27.7321		1.37299	0.174053
0.0425998	0.914808	RPS5A	sp|Q9ZUT9|RS51_ARATH 40S ribosomal protein S5-1 OS=Arabidopsis thaliana OX=3702 GN=RPS5A PE=1 SV=1	31.1858	31.0833	31.07	31.17	31.236	31.3738	31.1913	31.2219		1.37059	-0.128458
0.0428784	1.10846		sp|Q9SCX3|EF1B2_ARATH Elongation factor 1-beta 2 OS=Arabidopsis thaliana OX=3702 GN=At5g19510 PE=1 SV=1	31.1669	31.0965	31.088	31.2173	30.981	30.9956	30.8787	31.1191		1.36776	0.14856
0.0429189	1.53617	SUS1	sp|P49040|SUS1_ARATH Sucrose synthase 1 OS=Arabidopsis thaliana OX=3702 GN=SUS1 PE=1 SV=3	28.2547	28.4572	28.3702	27.7667	27.9122	27.7726	27.6246	27.062		1.36735	0.619335
0.0432439	1.16887	F9K20.10	sp|Q9ZVA4|EP1L3_ARATH EP1-like glycoprotein 3 OS=Arabidopsis thaliana OX=3702 GN=At1g78850 PE=1 SV=1	29.987	29.9762	29.903	30.0056	29.7931	29.9271	29.5179	29.7333		1.36407	0.22512
0.0435804	1.1284	GRF6	sp|P48349|14336_ARATH 14-3-3-like protein GF14 lambda OS=Arabidopsis thaliana OX=3702 GN=GRF6 PE=1 SV=1	30.419	30.3157	30.493	30.3085	30.2828	30.3088	30.1604	30.087		1.36071	0.174273
0.043958	0.809995	ABCG34	sp|Q7PC87|AB34G_ARATH ABC transporter G family member 34 OS=Arabidopsis thaliana OX=3702 GN=ABCG34 PE=2 SV=1	25.9503	25.9422	25.6267	25.9313	26.1937	26.1817	25.9272	26.364		1.35696	-0.304015
0.0441038	0.910626	ALY1	sp|Q8L773|THO4A_ARATH THO complex subunit 4A OS=Arabidopsis thaliana OX=3702 GN=ALY1 PE=1 SV=1	26.3733	26.2313	26.2187	26.3422	26.3743	26.533	26.4086	26.3898		1.35552	-0.13507
0.0442213	1.13868	GMII	sp|Q9LFR0|GMAN2_ARATH Alpha-mannosidase 2 OS=Arabidopsis thaliana OX=3702 GN=GMII PE=1 SV=1	25.0094	25.139	25.1913	25.0863	24.9294	24.746	24.9561	25.0451		1.35437	0.187364
0.0442253	1.14621	AVPL1	sp|Q56ZN6|AVP2_ARATH Pyrophosphate-energized membrane proton pump 2 OS=Arabidopsis thaliana OX=3702 GN=AVPL1 PE=1 SV=2	27.4649	27.4345	27.4118	27.3504	27.3815	27.291	27.0477	27.1539		1.35433	0.196866
0.0443164	1.42569	HSBP	sp|Q8GW48|HSBP_ARATH Heat shock factor-binding protein OS=Arabidopsis thaliana OX=3702 GN=HSBP PE=1 SV=1	29.0595	29.1163	28.6605	29.0993	28.3551	28.6606	28.0522	28.8211		1.35344	0.511657
0.0444235	0.691034	TIP1-2	sp|Q41963|TIP12_ARATH Aquaporin TIP1-2 OS=Arabidopsis thaliana OX=3702 GN=TIP1-2 PE=1 SV=2	30.788	30.4758	30.3704	31.1109	31.0285	30.9874	31.5222	31.3396		1.35239	-0.533171
0.0444999	1.32339	SRG1	sp|Q39224|SRG1_ARATH Protein SRG1 OS=Arabidopsis thaliana OX=3702 GN=SRG1 PE=2 SV=1	26.7394	26.8474	26.8866	26.499	26.5933	26.5447	26.1363	26.0812		1.35164	0.404243
0.0446367	1.13036	TIF4A-1	sp|P41376|IF4A1_ARATH Eukaryotic initiation factor 4A-1 OS=Arabidopsis thaliana OX=3702 GN=EIF4A1 PE=1 SV=1	30.3577	30.2816	30.2397	30.3636	30.2275	30.135	29.9553	30.2177		1.35031	0.176785
0.0450017	1.21575	SAR1A	sp|O04834|SAR1A_ARATH GTP-binding protein SAR1A OS=Arabidopsis thaliana OX=3702 GN=SAR1A PE=2 SV=1	30.1667	30.3082	30.0497	30.1172	29.7286	29.9672	29.7078	30.111		1.34677	0.281847
0.045118	0.725213		sp|Q9LFU5|TRM1_ARATH Probable tRNA (guanine(26)-N(2))-dimethyltransferase 1 OS=Arabidopsis thaliana OX=3702 GN=At5g15810 PE=2 SV=3	26.6323	25.929	26.2275	26.3944	26.911	26.8067	26.4386	26.8809		1.34565	-0.463523
0.0451667	0.955766	ENO1	sp|Q9C9C4|ENO1_ARATH Enolase 1, chloroplastic OS=Arabidopsis thaliana OX=3702 GN=ENO1 PE=1 SV=1	29.6564	29.573	29.6795	29.6316	29.6977	29.7348	29.6795	29.6895		1.34518	-0.0652699
0.0453251	1.10834	ABCB25	sp|Q9LVM1|AB25B_ARATH ABC transporter B family member 25, mitochondrial OS=Arabidopsis thaliana OX=3702 GN=ABCB25 PE=1 SV=1	26.3535	26.5577	26.6023	26.4598	26.3493	26.302	26.33	26.3983		1.34366	0.148403
0.0453882	1.2071	D2HGDH	sp|O23240|D2HDH_ARATH D-2-hydroxyglutarate dehydrogenase, mitochondrial OS=Arabidopsis thaliana OX=3702 GN=D2HGDH PE=1 SV=3	25.2967	25.3762	25.0393	25.0241	24.9943	25.0226	24.7611	24.8721		1.34306	0.271542
0.0455231	0.809605		sp|Q9SUM2|RUXF_ARATH Probable small nuclear ribonucleoprotein F OS=Arabidopsis thaliana OX=3702 GN=At4g30220 PE=3 SV=1	27.5263	27.4159	27.5275	27.8064	28.0342	27.9149	27.6231	27.9227		1.34177	-0.304709
0.0455968	0.873011	RANBP1A	sp|Q9LMK7|RBP1A_ARATH Ran-binding protein 1 homolog a OS=Arabidopsis thaliana OX=3702 GN=RANBP1A PE=1 SV=1	29.1113	29.1179	29.2191	29.4309	29.4334	29.3674	29.4698	29.3923		1.34107	-0.195928
0.0456139	1.09678	ALDH6B2	sp|Q0WM29|MMSA_ARATH Methylmalonate-semialdehyde dehydrogenase [acylating], mitochondrial OS=Arabidopsis thaliana OX=3702 GN=ALDH6B2 PE=1 SV=2	27.9391	27.7938	27.8367	27.8368	27.7437	27.7951	27.5948	27.7398		1.3409	0.133269
0.0464475	0.669056	TFCA	sp|O04350|TBCA_ARATH Tubulin-folding cofactor A OS=Arabidopsis thaliana OX=3702 GN=TFCA PE=1 SV=2	26.5583	26.0735	26.4862	26.4898	26.6007	26.6728	27.4241	27.2294		1.33304	-0.579802
0.04657	1.1406	COX1	sp|P60620|COX1_ARATH Cytochrome c oxidase subunit 1 OS=Arabidopsis thaliana OX=3702 GN=COX1 PE=3 SV=1	27.7839	27.6391	27.7911	27.5248	27.4908	27.5495	27.3799	27.5596		1.33189	0.189798
0.0466904	1.25697	PFK7	sp|Q9C5J7|PFKA7_ARATH ATP-dependent 6-phosphofructokinase 7 OS=Arabidopsis thaliana OX=3702 GN=PFK7 PE=1 SV=1	29.6343	29.6219	29.7031	29.2876	29.399	29.2128	29.3395	28.9758		1.33077	0.329953
0.0467035	0.895839	AHA1	sp|P20649|PMA1_ARATH ATPase 1, plasma membrane-type OS=Arabidopsis thaliana OX=3702 GN=AHA1 PE=1 SV=3	29.367	29.4416	29.3442	29.1935	29.5718	29.5388	29.4579	29.4126		1.33065	-0.158688
0.0470936	1.31909	SEC22	sp|Q94AU2|SEC22_ARATH 25.3 kDa vesicle transport protein OS=Arabidopsis thaliana OX=3702 GN=SEC22 PE=2 SV=1	27.6865	27.4723	27.3155	27.2957	27.1252	27.2243	26.6502	27.1722		1.32704	0.399541
0.0472472	1.51687	SDR3a	sp|O80713|SDR3A_ARATH Short-chain dehydrogenase reductase 3a OS=Arabidopsis thaliana OX=3702 GN=SDR3a PE=2 SV=1	28.8786	28.9758	29.1295	28.4111	28.6095	28.4079	28.2311	27.7419		1.32562	0.601098
0.0473875	0.825287	HDA6	sp|Q9FML2|HDA6_ARATH Histone deacetylase 6 OS=Arabidopsis thaliana OX=3702 GN=HDA6 PE=1 SV=1	25.2463	24.7948	25.271	25.104	25.4148	25.3989	25.3202	25.3902		1.32434	-0.277031
0.0475865	1.29661	GLO5	sp|O49506|GLO5_ARATH Peroxisomal (S)-2-hydroxy-acid oxidase GLO5 OS=Arabidopsis thaliana OX=3702 GN=GLO5 PE=1 SV=1	28.1776	28.1738	28.4763	27.9827	28.0351	27.8462	27.9148	27.5153		1.32252	0.374743
0.0476633	0.934284	CYSC1	sp|Q9S757|CYSC1_ARATH Bifunctional L-3-cyanoalanine synthase/cysteine synthase C1, mitochondrial OS=Arabidopsis thaliana OX=3702 GN=CYSC1 PE=1 SV=1	29.4441	29.4173	29.3951	29.5326	29.526	29.5843	29.482	29.5891		1.32182	-0.0980663
0.0478245	0.730174	TIF4A-3	sp|Q9CAI7|IF4A3_ARATH Eukaryotic initiation factor 4A-3 OS=Arabidopsis thaliana OX=3702 GN=TIF4A-3 PE=1 SV=1	26.5343	26.329	26.3033	26.5884	26.5454	27.0291	26.6988	27.2964		1.32035	-0.453688
0.0479308	1.67428	DOX1	sp|Q9SGH6|DOX1_ARATH Alpha-dioxygenase 1 OS=Arabidopsis thaliana OX=3702 GN=DOX1 PE=1 SV=1	31.4428	31.7384	31.7654	30.9647	30.9553	30.9442	31.0085	30.0292		1.31939	0.743542
0.0480072	1.18645	CHY1	sp|Q9LKJ1|HIBC1_ARATH 3-hydroxyisobutyryl-CoA hydrolase 1 OS=Arabidopsis thaliana OX=3702 GN=CHY1 PE=1 SV=1	27.6698	27.7387	27.5767	27.4084	27.2615	27.5281	27.223	27.3944		1.31869	0.246645
0.0480137	0.859082		sp|O81769|DPH5_ARATH Probable diphthine methyl ester synthase OS=Arabidopsis thaliana OX=3702 GN=At4g31790 PE=2 SV=1	26.2242	26.2474	26.3226	26.1823	26.6539	26.4848	26.4673	26.2471		1.31864	-0.219131
0.0480611	0.88066	PPA6	sp|Q9LXC9|IPYR6_ARATH Soluble inorganic pyrophosphatase 6, chloroplastic OS=Arabidopsis thaliana OX=3702 GN=PPA6 PE=1 SV=1	28.7868	28.82	28.6599	28.9237	28.9607	28.858	29.1001	29.005		1.31821	-0.183343
0.0485791	1.53629	OEP24A	sp|Q1H5C9|OP24A_ARATH Outer envelope pore protein 24A, chloroplastic OS=Arabidopsis thaliana OX=3702 GN=OEP24A PE=1 SV=1	24.9842	25.1303	25.1158	24.9799	24.2583	23.8693	24.5629	25.0419		1.31355	0.619452
0.0487034	0.853486	PCNA	sp|Q9M7Q7|PCNA1_ARATH Proliferating cellular nuclear antigen 1 OS=Arabidopsis thaliana OX=3702 GN=PCNA PE=1 SV=2	28.6534	28.4473	28.4296	28.7534	28.7992	28.9136	28.6785	28.8065		1.31244	-0.228561
0.0488447	1.08227	RABA4B	sp|Q9SMQ6|RAA4B_ARATH Ras-related protein RABA4b OS=Arabidopsis thaliana OX=3702 GN=RABA4B PE=1 SV=1	26.141	26.0021	26.1334	26.1439	25.8995	26.0331	26.0075	26.0241		1.31118	0.114059
0.0488744	1.21773	PROC1	sp|P54904|P5CR1_ARATH Pyrroline-5-carboxylate reductase OS=Arabidopsis thaliana OX=3702 GN=PROC1 PE=2 SV=1	27.2693	27.3888	27.3142	27.0231	27.0036	26.9164	26.7686	27.17		1.31092	0.2842
0.048921	0.835919	DHS1	sp|P29976|AROF_ARATH Phospho-2-dehydro-3-deoxyheptonate aldolase 1, chloroplastic OS=Arabidopsis thaliana OX=3702 GN=DHS1 PE=2 SV=2	29.4536	29.5341	29.2911	29.5231	29.6442	29.8446	29.4873	29.8601		1.3105	-0.258565
0.0493953	0.787402	RBG2	sp|Q9SVM8|RBG2_ARATH Glycine-rich RNA-binding protein 2, mitochondrial OS=Arabidopsis thaliana OX=3702 GN=RBG2 PE=1 SV=1	30.0943	29.511	29.7001	29.8527	30.0124	30.1661	30.0488	30.3101		1.30631	-0.344828
0.0494159	1.13162	SPMS	sp|Q94BN2|SPSY_ARATH Spermine synthase OS=Arabidopsis thaliana OX=3702 GN=SPMS PE=1 SV=1	27.1975	27.4028	27.3424	27.1692	27.2184	27.1257	27.0249	27.0294		1.30613	0.178385
0.04957	0.72928		sp|Q8W593|LGUC_ARATH Probable lactoylglutathione lyase, chloroplastic OS=Arabidopsis thaliana OX=3702 GN=At1g67280 PE=1 SV=1	25.9126	25.9675	25.7726	25.6928	26.2904	26.2309	26.7474	25.8986		1.30478	-0.455454
0.0496123	0.781193	T5J8.16	sp|Q9SY09|SMD1B_ARATH Small nuclear ribonucleoprotein SmD1b OS=Arabidopsis thaliana OX=3702 GN=SMD1B PE=3 SV=1	27.7487	27.8205	28.1034	28.1077	28.0544	28.4379	28.1807	28.5324		1.30441	-0.356249
0.0497104	0.867862		sp|P59259|H4_ARATH Histone H4 OS=Arabidopsis thaliana OX=3702 GN=At1g07660 PE=1 SV=2	31.8259	31.6434	31.5002	31.6053	31.9502	31.787	31.7463	31.9091		1.30355	-0.204462
0.0503226	1.10821	GPX6	sp|O48646|GPX6_ARATH Probable phospholipid hydroperoxide glutathione peroxidase 6, mitochondrial OS=Arabidopsis thaliana OX=3702 GN=GPX6 PE=2 SV=2	31.3281	31.2888	31.2986	31.1695	31.0988	31.2694	31.0686	31.0553		1.29824	0.148231
0.0503383	1.17534	ACLB-2	sp|Q9FGX1|ACLB2_ARATH ATP-citrate synthase beta chain protein 2 OS=Arabidopsis thaliana OX=3702 GN=ACLB-2 PE=1 SV=1	30.0009	30.0268	29.8375	30.093	29.7243	29.7686	29.5759	29.957		1.2981	0.233083
0.0504548	1.47446		sp|Q9FKE9|RHD32_ARATH Protein ROOT HAIR DEFECTIVE 3 homolog 2 OS=Arabidopsis thaliana OX=3702 GN=At5g45160 PE=2 SV=1	24.4057	24.8712	24.9189	24.6636	24.304	24.3748	23.5643	24.3755		1.2971	0.560188
0.0506826	1.21447		sp|Q9ZV06|NATAL_ARATH Probable acetyltransferase NATA1-like OS=Arabidopsis thaliana OX=3702 GN=At2g39020 PE=2 SV=1	26.6929	26.9619	26.6175	26.847	26.4943	26.6153	26.2602	26.6281		1.29514	0.280324
0.0507086	0.901758	RBP45B	sp|Q9SAB3|RB45B_ARATH Polyadenylate-binding protein RBP45B OS=Arabidopsis thaliana OX=3702 GN=RBP45B PE=1 SV=1	27.8651	27.8317	27.9133	27.929	28.0835	28.0723	27.8651	28.115		1.29492	-0.149188
0.0507581	1.12039	RPN10	sp|P55034|PSMD4_ARATH 26S proteasome non-ATPase regulatory subunit 4 homolog OS=Arabidopsis thaliana OX=3702 GN=RPN10 PE=1 SV=1	29.0212	29.079	29.033	29.0067	28.954	28.9739	28.6866	28.8695		1.29449	0.163996
0.0508646	0.900654	TIC40	sp|Q9FMD5|TIC40_ARATH Protein TIC 40, chloroplastic OS=Arabidopsis thaliana OX=3702 GN=TIC40 PE=1 SV=1	26.2815	26.3412	26.3156	26.3957	26.3786	26.4478	26.6465	26.465		1.29358	-0.150955
0.0509903	1.12267	ADK1	sp|Q9SF85|ADK1_ARATH Adenosine kinase 1 OS=Arabidopsis thaliana OX=3702 GN=ADK1 PE=1 SV=1	32.0001	31.9688	31.9305	32.1025	31.8125	31.7945	31.7287	31.9986		1.29251	0.166934
0.051087	1.17008	ECHIA	sp|Q6NL24|ECH1P_ARATH Probable enoyl-CoA hydratase 1, peroxisomal OS=Arabidopsis thaliana OX=3702 GN=ECHIA PE=1 SV=1	27.1527	27.155	27.1016	26.9032	26.954	26.9583	26.8413	26.6524		1.29169	0.226611
0.0511923	1.20307	CXE2	sp|Q9SX78|CXE2_ARATH Probable carboxylesterase 2 OS=Arabidopsis thaliana OX=3702 GN=CXE2 PE=2 SV=1	27.3461	27.5297	27.3005	27.07	27.1667	27.1039	26.991	26.9179		1.2908	0.26672
0.0512407	1.14885	RH11	sp|Q8LA13|RH11_ARATH DEAD-box ATP-dependent RNA helicase 11 OS=Arabidopsis thaliana OX=3702 GN=RH11 PE=1 SV=1	28.311	28.3652	28.239	28.3492	28.1863	28.1133	27.9021	28.2621		1.29038	0.200187
0.0512983	0.815426	IMDH1	sp|Q9SA14|LEU33_ARATH 3-isopropylmalate dehydrogenase 3, chloroplastic OS=Arabidopsis thaliana OX=3702 GN=IMDH3 PE=1 SV=2	27.6885	27.5478	27.5478	27.5875	27.607	27.8032	28.144	27.9949		1.2899	-0.294374
0.0513434	1.17968		sp|Q9ASQ2|MAMYB_ARATH Transcription factor MAMYB OS=Arabidopsis thaliana OX=3702 GN=MAMYB PE=1 SV=1	25.1043	25.2197	25.1282	25.1914	24.9002	25.0801	24.6643	25.0454		1.28952	0.23839
0.0513646	1.17569	CSE	sp|Q9C942|CSE_ARATH Caffeoylshikimate esterase OS=Arabidopsis thaliana OX=3702 GN=CSE PE=1 SV=1	28.6874	28.6554	28.6572	28.7152	28.3688	28.5203	28.2255	28.6664		1.28934	0.233508
0.0514504	1.15312	SNF4	sp|Q944A6|SNF4_ARATH Sucrose nonfermenting 4-like protein OS=Arabidopsis thaliana OX=3702 GN=SNF4 PE=1 SV=1	26.3047	26.3687	26.1568	26.024	26.0256	25.9765	26.0963	25.9338		1.28861	0.205544
0.0515269	1.15783	UKL2	sp|Q9LK34|UKL2_ARATH Uridine kinase-like protein 2, chloroplastic OS=Arabidopsis thaliana OX=3702 GN=UKL2 PE=2 SV=1	27.3832	27.397	27.3893	27.1204	27.2709	27.0989	27.0441	27.0303		1.28797	0.21142
0.0515923	0.69094	RLK902	sp|Q9LVI6|RLK90_ARATH Probable inactive receptor kinase RLK902 OS=Arabidopsis thaliana OX=3702 GN=RLK902 PE=1 SV=1	24.8164	25.1069	25.042	25.4181	25.2947	25.5332	25.5424	26.1464		1.28741	-0.533368
0.0517244	1.2879	FAO4B	sp|Q94BP3|FAO4B_ARATH Long-chain-alcohol oxidase FAO4B OS=Arabidopsis thaliana OX=3702 GN=FAO4B PE=2 SV=2	24.7044	24.5975	24.8201	24.63	24.4744	23.9114	24.3602	24.5457		1.2863	0.365024
0.051895	0.792077	F26K24.6	sp|Q9SF21|RICE1_ARATH Protein RISC-INTERACTING CLEARING 3-5 EXORIBONUCLEASE 1 OS=Arabidopsis thaliana OX=3702 GN=RICE1 PE=1 SV=1	30.1793	30.0807	30.1059	29.8191	30.3383	30.6186	30.0845	30.4886		1.28487	-0.336287
0.0519267	0.619925	PHYA	sp|P14712|PHYA_ARATH Phytochrome A OS=Arabidopsis thaliana OX=3702 GN=PHYA PE=1 SV=2	24.2402	24.3435	23.257	24.4401	24.9318	24.8141	24.5574	24.7368		1.28461	-0.689835
0.0520984	1.12721	ALDH12A1	sp|Q8VZC3|AL121_ARATH Delta-1-pyrroline-5-carboxylate dehydrogenase 12A1, mitochondrial OS=Arabidopsis thaliana OX=3702 GN=ALDH12A1 PE=2 SV=1	29.1394	29.2454	29.2127	29.0754	29.0852	29.0814	28.9885	28.8268		1.28318	0.172751
0.052115	1.09714	EMB2753	sp|Q8VZM1|NAA15_ARATH N-terminal acetyltransferase A complex auxiliary subunit NAA15 OS=Arabidopsis thaliana OX=3702 GN=NAA15 PE=1 SV=1	28.3258	28.3339	28.3187	28.3082	28.2983	28.1893	28.0372	28.2268		1.28304	0.133749
0.0523267	0.918425		sp|P33207|FABG_ARATH 3-oxoacyl-[acyl-carrier-protein] reductase, chloroplastic OS=Arabidopsis thaliana OX=3702 GN=At1g24360 PE=1 SV=2	28.8838	28.8334	28.7363	28.85	29.0016	28.9865	28.8302	28.9763		1.28128	-0.122766
0.0523807	1.1168	SPI	sp|F4HZB2|BCHA1_ARATH Protein SPIRRIG OS=Arabidopsis thaliana OX=3702 GN=SPI PE=1 SV=1	29.9326	30.1001	30.1937	30.0619	29.8504	30.0208	29.8723	29.9073		1.28083	0.159369
0.0527938	1.18288	ASP4	sp|P46646|AAT4_ARATH Aspartate aminotransferase, cytoplasmic isozyme 2 OS=Arabidopsis thaliana OX=3702 GN=ASP4 PE=2 SV=2	26.638	26.5035	26.3458	26.4728	26.4674	26.2679	26.1054	26.1502		1.27742	0.2423
0.0531613	0.888359	NUP93A	sp|O22224|NP93A_ARATH Nuclear pore complex protein NUP93A OS=Arabidopsis thaliana OX=3702 GN=NUP93A PE=1 SV=2	25.3655	25.3236	25.142	25.2759	25.4996	25.5076	25.2919	25.4909		1.2744	-0.170784
0.053167	0.735062	CLPP3	sp|Q9SXJ6|CLPP3_ARATH ATP-dependent Clp protease proteolytic subunit 3, chloroplastic OS=Arabidopsis thaliana OX=3702 GN=CLPP3 PE=1 SV=1	25.9561	26.2287	26.0623	26.2746	26.2588	26.6112	27.034	26.3939		1.27436	-0.444062
0.0532116	1.22953	LPAT2	sp|Q8LG50|LPAT2_ARATH 1-acyl-sn-glycerol-3-phosphate acyltransferase 2 OS=Arabidopsis thaliana OX=3702 GN=LPAT2 PE=1 SV=2	27.1468	26.9446	26.8353	26.9621	26.7483	26.7892	26.3578	26.8011		1.27399	0.298106
0.0533116	0.658427	SDHAF2	sp|Q9FI44|SDAF2_ARATH Succinate dehydrogenase assembly factor 2, mitochondrial OS=Arabidopsis thaliana OX=3702 GN=SDHAF2 PE=1 SV=1	27.9667	28.1113	28.7255	28.5109	29.1114	29.3333	28.5278	28.7536		1.27318	-0.602905
0.0533822	1.2504	DJ1A	sp|Q9FPF0|DJ1A_ARATH Protein DJ-1 homolog A OS=Arabidopsis thaliana OX=3702 GN=DJ1A PE=1 SV=1	32.6618	32.9184	33.0674	32.5765	32.593	32.3287	32.619	32.3939		1.2726	0.322385
0.053513	1.31968	JAL22	sp|O80950|JAL22_ARATH Jacalin-related lectin 22 OS=Arabidopsis thaliana OX=3702 GN=JAL22 PE=1 SV=1	30.3346	30.2325	30.1374	29.8232	30.0517	29.6349	29.7803	29.46		1.27154	0.40019
0.0535415	1.17293	RGP5	sp|Q9FFD2|RGP5_ARATH Probable UDP-arabinopyranose mutase 5 OS=Arabidopsis thaliana OX=3702 GN=RGP5 PE=1 SV=1	28.3226	28.3369	28.2699	28.4677	28.1539	28.1955	27.8683	28.2588		1.27131	0.230122
0.0535636	0.794066	CLPR3	sp|Q8L770|CLPR3_ARATH ATP-dependent Clp protease proteolytic subunit-related protein 3, chloroplastic OS=Arabidopsis thaliana OX=3702 GN=CLPR3 PE=1 SV=1	26.6169	26.6725	26.5602	26.852	26.6853	27.0669	27.283	26.9971		1.27113	-0.33267
0.0538802	1.05254		sp|Q9FNN5|NDUV1_ARATH NADH dehydrogenase [ubiquinone] flavoprotein 1, mitochondrial OS=Arabidopsis thaliana OX=3702 GN=At5g08530 PE=1 SV=1	29.3499	29.3598	29.3828	29.3569	29.3752	29.2381	29.2628	29.2778		1.26857	0.0738759
0.0539244	1.09006	RPN6	sp|Q9LP45|PSD11_ARATH 26S proteasome non-ATPase regulatory subunit 11 homolog OS=Arabidopsis thaliana OX=3702 GN=RPN6 PE=1 SV=1	29.0133	29.1174	29.0152	29.0689	28.9809	28.8632	28.8419	29.0312		1.26821	0.124401
0.0540255	1.0994	GSTF8	sp|Q96266|GSTF8_ARATH Glutathione S-transferase F8, chloroplastic OS=Arabidopsis thaliana OX=3702 GN=GSTF8 PE=1 SV=3	32.3818	32.2902	32.4695	32.3056	32.1812	32.2606	32.318	32.1404		1.2674	0.136723
0.0541644	0.883142	TIM	sp|Q9SKP6|TPIC_ARATH Triosephosphate isomerase, chloroplastic OS=Arabidopsis thaliana OX=3702 GN=TIM PE=1 SV=1	29.7982	29.626	29.7118	29.9097	29.881	29.8599	30.0528	29.9691		1.26629	-0.179283
0.054302	1.10277	ARD3	sp|Q8W108|MTND3_ARATH 1,2-dihydroxy-3-keto-5-methylthiopentene dioxygenase 3 OS=Arabidopsis thaliana OX=3702 GN=ARD3 PE=1 SV=1	28.6823	28.7331	28.8896	28.6778	28.6327	28.6767	28.5813	28.5275		1.26518	0.141129
0.0543515	0.876023		sp|Q96252|ATP4_ARATH ATP synthase subunit delta, mitochondrial OS=Arabidopsis thaliana OX=3702 GN=At5g47030 PE=1 SV=1	30.2519	29.8955	29.9879	30.1363	30.2684	30.278	30.2709	30.2182		1.26479	-0.190959
0.054446	1.20685	DWF5	sp|Q9LDU6|ST7R_ARATH 7-dehydrocholesterol reductase OS=Arabidopsis thaliana OX=3702 GN=DWF5 PE=1 SV=1	27.6881	27.5667	27.5989	27.7684	27.5181	27.2193	27.1939	27.6058		1.26403	0.271244
0.0545011	1.08413		sp|Q8H0V3|LGUL_ARATH Lactoylglutathione lyase OS=Arabidopsis thaliana OX=3702 GN=At1g08110 PE=2 SV=1	27.5794	27.5316	27.3722	27.5631	27.4234	27.3688	27.3867	27.4012		1.2636	0.116543
0.0546033	0.75491		sp|Q9LME4|P2C09_ARATH Probable protein phosphatase 2C 9 OS=Arabidopsis thaliana OX=3702 GN=At1g22280 PE=1 SV=1	27.007	26.945	27.031	26.9045	27.4074	27.7976	26.9803	27.3247		1.26278	-0.405624
0.0548555	1.31137	CYP84A1	sp|Q42600|C84A1_ARATH Cytochrome P450 84A1 OS=Arabidopsis thaliana OX=3702 GN=CYP84A1 PE=1 SV=1	25.539	25.351	25.3647	25.6277	25.4672	24.8854	25.1599	24.8056		1.26078	0.391079
0.0549283	1.22158	SAL3	sp|Q8GY63|DPNP3_ARATH Probable SAL3 phosphatase OS=Arabidopsis thaliana OX=3702 GN=SAL3 PE=2 SV=1	26.7909	26.7936	26.875	26.6242	26.4933	26.7285	26.1957	26.5114		1.2602	0.288743
0.0551073	1.09146	ITPK1	sp|Q9SBA5|ITPK1_ARATH Inositol-tetrakisphosphate 1-kinase 1 OS=Arabidopsis thaliana OX=3702 GN=ITPK1 PE=1 SV=1	26.949	26.9189	26.9751	26.9639	26.7082	26.8232	26.8103	26.9601		1.25879	0.126263
0.0551088	1.11653	OEP24B	sp|Q8H0Y1|OP24B_ARATH Outer envelope pore protein 24B, chloroplastic OS=Arabidopsis thaliana OX=3702 GN=OEP24B PE=2 SV=1	28.0311	28.0785	28.128	27.8841	27.9082	27.8249	27.7841	27.9684		1.25878	0.159028
0.0554065	1.12448	OST3B	sp|Q9SYB5|OST3B_ARATH Probable dolichyl-diphosphooligosaccharide--protein glycosyltransferase subunit 3B OS=Arabidopsis thaliana OX=3702 GN=OST3B PE=2 SV=1	27.5705	27.576	27.452	27.5557	27.4099	27.3235	27.2184	27.5254		1.25644	0.169255
0.0554289	1.13223	RPN12A	sp|Q9SGW3|PSD8A_ARATH 26S proteasome non-ATPase regulatory subunit 8 homolog A OS=Arabidopsis thaliana OX=3702 GN=RPN12A PE=1 SV=1	28.9835	29.0321	29.0358	28.9602	28.7624	28.9096	28.6487	28.9741		1.25626	0.179172
0.0554744	1.14559	IDH5	sp|Q945K7|IDH5_ARATH Isocitrate dehydrogenase [NAD] catalytic subunit 5, mitochondrial OS=Arabidopsis thaliana OX=3702 GN=IDH5 PE=1 SV=1	29.5918	29.6919	29.7726	29.4438	29.5479	29.431	29.3822	29.3546		1.25591	0.196085
0.0555444	1.22231	GSTU27	sp|Q9LZG7|GSTUR_ARATH Glutathione S-transferase U27 OS=Arabidopsis thaliana OX=3702 GN=GSTU27 PE=2 SV=1	28.0249	28.1006	27.9585	27.8079	27.8358	27.8134	27.3797	27.7046		1.25536	0.289611
0.0556457	1.13756	CCT1	sp|P28769|TCPA_ARATH T-complex protein 1 subunit alpha OS=Arabidopsis thaliana OX=3702 GN=CCT1 PE=1 SV=1	29.6096	29.6537	29.5272	29.6669	29.4344	29.4628	29.235	29.5814		1.25457	0.185948
0.05567	1.17273	MT-CYB	sp|P42792|CYB_ARATH Cytochrome b OS=Arabidopsis thaliana OX=3702 GN=MT-CYB PE=1 SV=2	28.5273	28.5566	28.601	28.4912	28.4877	28.454	28.0947	28.2203		1.25438	0.229868
0.0558296	0.924225	RPL8C	sp|Q42064|RL83_ARATH 60S ribosomal protein L8-3 OS=Arabidopsis thaliana OX=3702 GN=RPL8C PE=2 SV=2	31.7862	31.7062	31.6077	31.7532	31.7571	31.8195	31.8368	31.8946		1.25314	-0.113683
0.056821	1.11497	UBP12	sp|Q9FPT1|UBP12_ARATH Ubiquitin C-terminal hydrolase 12 OS=Arabidopsis thaliana OX=3702 GN=UBP12 PE=1 SV=2	27.0712	27.1236	26.9467	26.9515	27.0047	26.8559	26.7665	26.8379		1.24549	0.156999
0.0570685	1.20786	BGLU46	sp|O80690|BGL46_ARATH Beta-glucosidase 46 OS=Arabidopsis thaliana OX=3702 GN=BGLU46 PE=1 SV=2	26.167	26.3505	26.0645	25.8224	25.7813	25.9118	25.8651	25.7564		1.2436	0.272449
0.0571143	0.626245	NPF8.3	sp|P46032|PTR2_ARATH Protein NRT1/ PTR FAMILY 8.3 OS=Arabidopsis thaliana OX=3702 GN=NPF8.3 PE=1 SV=1	25.4038	26.5122	26.4639	26.4727	26.9302	27.1366	26.8175	26.6691		1.24325	-0.675202
0.0574366	0.914441	ADK1	sp|O82514|KAD4_ARATH Adenylate kinase 4 OS=Arabidopsis thaliana OX=3702 GN=ADK1 PE=1 SV=2	29.7486	29.7077	29.7039	29.7671	29.9304	29.9708	29.7566	29.7856		1.24081	-0.129038
0.0574504	0.714759	At2g39130	sp|F4IUW3|AVT1C_ARATH Amino acid transporter AVT1C OS=Arabidopsis thaliana OX=3702 GN=AVT1C PE=1 SV=1	24.5002	25.0193	24.9395	25.279	25.2685	25.6125	25.136	25.6588		1.24071	-0.484472
0.0576257	0.920912	GDPDL4	sp|Q9FJ62|GPDL4_ARATH Glycerophosphodiester phosphodiesterase GDPDL4 OS=Arabidopsis thaliana OX=3702 GN=GDPDL4 PE=1 SV=1	27.9892	27.8788	27.8652	27.9477	28.0843	28.1187	27.9295	28.0239		1.23938	-0.118864
0.0585062	0.655864		sp|Q9FK75|GDL82_ARATH GDSL esterase/lipase At5g45670 OS=Arabidopsis thaliana OX=3702 GN=At5g45670 PE=2 SV=1	23.8451	24.6485	23.472	24.2771	24.5731	24.8056	24.6085	24.6897		1.2328	-0.608531
0.0585089	1.14861	LGALDH	sp|O81884|GALDH_ARATH L-galactose dehydrogenase OS=Arabidopsis thaliana OX=3702 GN=LGALDH PE=1 SV=1	26.1095	26.2412	25.975	26.0706	25.8538	26.0766	25.9019	25.7645		1.23278	0.199893
0.0585331	1.26063	PER34	sp|Q9SMU8|PER34_ARATH Peroxidase 34 OS=Arabidopsis thaliana OX=3702 GN=PER34 PE=1 SV=1	31.8692	31.7847	31.7635	31.6215	31.5725	31.7287	31.1952	31.2059		1.2326	0.334145
0.0585864	0.830452	At1g63500	sp|F4I3M3|BSK7_ARATH Serine/threonine-protein kinase BSK7 OS=Arabidopsis thaliana OX=3702 GN=BSK7 PE=3 SV=1	26.3646	26.2946	26.1986	26.3298	26.7794	26.7131	26.3142	26.453		1.2322	-0.268032
0.0586262	0.844936	At4g39730	sp|O65660|PLAT1_ARATH PLAT domain-containing protein 1 OS=Arabidopsis thaliana OX=3702 GN=PLAT1 PE=1 SV=1	29.4565	29.5613	29.3057	29.3907	29.6285	29.9352	29.564	29.5588		1.23191	-0.243086
0.0586921	1.45473	SBT3.5	sp|Q9MAP7|SBT35_ARATH Subtilisin-like protease SBT3.5 OS=Arabidopsis thaliana OX=3702 GN=SBT3.5 PE=1 SV=1	25.8947	26.3423	25.8408	26.2353	25.2676	26.1204	25.3984	25.3637		1.23142	0.540749
0.0588011	0.728639	TS2	sp|Q9SSP5|THRC2_ARATH Threonine synthase 2, chloroplastic OS=Arabidopsis thaliana OX=3702 GN=TS2 PE=1 SV=1	25.2895	25.3179	25.2177	24.9227	25.3419	26.1459	25.548	25.539		1.23061	-0.456725
0.0591755	1.11582	PAB2	sp|P42731|PABP2_ARATH Polyadenylate-binding protein 2 OS=Arabidopsis thaliana OX=3702 GN=PAB2 PE=1 SV=1	29.2762	29.2709	29.2536	29.1895	29.1604	29.2006	28.9066	29.0902		1.22786	0.1581
0.059725	0.637043		sp|Q9FF10|HPSE1_ARATH Heparanase-like protein 1 OS=Arabidopsis thaliana OX=3702 GN=At5g07830 PE=2 SV=1	23.9819	25.0761	25.0624	25.0841	25.3466	25.3792	25.6382	25.4427		1.22384	-0.650537
0.0598727	0.891055	PGDH2	sp|O04130|SERA2_ARATH D-3-phosphoglycerate dehydrogenase 2, chloroplastic OS=Arabidopsis thaliana OX=3702 GN=PGDH2 PE=1 SV=2	28.5426	28.5735	28.7177	28.5298	28.6784	28.6569	28.907	28.787		1.22277	-0.166413
0.0598952	0.550445	OXA1L	sp|Q9SKD3|OXA1L_ARATH Mitochondrial inner membrane protein OXA1-like OS=Arabidopsis thaliana OX=3702 GN=OXA1L PE=2 SV=1	24.9594	24.1531	23.5661	23.7434	25.2163	25.113	24.3528	25.1851		1.22261	-0.86133
0.059942	0.859532	KING1	sp|Q8LBB2|KING1_ARATH SNF1-related protein kinase regulatory subunit gamma-1 OS=Arabidopsis thaliana OX=3702 GN=KING1 PE=1 SV=2	26.6125	26.8304	26.8411	26.6067	26.9425	27.1049	26.7714	26.9454		1.22227	-0.218377
0.0600011	0.863728	STA1	sp|Q9ZT71|STA1_ARATH Protein STABILIZED1 OS=Arabidopsis thaliana OX=3702 GN=STA1 PE=1 SV=1	25.5838	25.2546	25.1996	25.2876	25.499	25.6246	25.5548	25.4925		1.22184	-0.211351
0.0600514	1.22385	SPK1	sp|Q8SAB7|SPK1_ARATH Guanine nucleotide exchange factor SPIKE 1 OS=Arabidopsis thaliana OX=3702 GN=SPK1 PE=1 SV=1	26.291	26.5298	26.2374	26.3991	26.2517	26.0275	25.7854	26.2271		1.22148	0.291428
0.0600752	1.15823	GRF7	sp|Q96300|14337_ARATH 14-3-3-like protein GF14 nu OS=Arabidopsis thaliana OX=3702 GN=GRF7 PE=1 SV=1	30.0506	30.2722	30.1061	30.1823	29.7995	29.8416	29.9771	30.1455		1.2213	0.211918
0.0601661	2.00561	CAT3	sp|Q42547|CATA3_ARATH Catalase-3 OS=Arabidopsis thaliana OX=3702 GN=CAT3 PE=1 SV=3	30.3215	30.3021	30.1055	29.5614	28.8772	29.0351	30.1361	28.2259		1.22065	1.00404
0.0602311	1.11204	CPA	sp|Q8VYF5|NILP1_ARATH N-carbamoylputrescine amidase OS=Arabidopsis thaliana OX=3702 GN=CPA PE=1 SV=2	27.88	27.8916	27.8622	27.8544	27.8928	27.6766	27.5782	27.7277		1.22018	0.153204
0.0606746	1.18402	T27I15_140	sp|Q9LEX1|CLB_ARATH Calcium-dependent lipid-binding protein OS=Arabidopsis thaliana OX=3702 GN=CLB PE=1 SV=1	28.4579	28.6501	28.4066	28.4253	28.1995	28.236	28.0485	28.4811		1.21699	0.243699
0.0607273	0.68275	RIBA2	sp|Q6NLQ7|RIBA2_ARATH Monofunctional riboflavin biosynthesis protein RIBA 2, chloroplastic OS=Arabidopsis thaliana OX=3702 GN=RIBA2 PE=1 SV=1	24.2811	24.7869	24.3087	23.771	24.5305	25.0762	24.9575	24.7857		1.21662	-0.55057
0.0608184	1.1798	SKD1	sp|Q9ZNT0|VPS4_ARATH Protein SUPPRESSOR OF K(+) TRANSPORT GROWTH DEFECT 1 OS=Arabidopsis thaliana OX=3702 GN=SKD1 PE=1 SV=1	27.2998	27.3471	27.1169	27.1112	27.0926	27.1211	26.7557	26.9514		1.21597	0.23854
0.0608584	1.1259	NSP5	sp|Q93XW5|NSP5_ARATH Nitrile-specifier protein 5 OS=Arabidopsis thaliana OX=3702 GN=NSP5 PE=2 SV=1	28.5254	28.6477	28.7689	28.5388	28.4387	28.3995	28.3711	28.5873		1.21568	0.171084
0.0610385	0.69839	CID10	sp|Q9SG10|CID10_ARATH Polyadenylate-binding protein-interacting protein 10 OS=Arabidopsis thaliana OX=3702 GN=CID10 PE=2 SV=1	23.8836	23.2092	23.5428	24.121	24.1141	24.4148	23.9579	24.3414		1.2144	-0.517896
0.0610469	1.14782	PBD2	sp|O24633|PSB2B_ARATH Proteasome subunit beta type-2-B OS=Arabidopsis thaliana OX=3702 GN=PBD2 PE=1 SV=1	28.953	28.9861	28.9902	28.8238	28.8476	28.852	28.5226	28.7354		1.21434	0.198894
0.0611107	0.853475	MSSP1	sp|Q96290|MSSP1_ARATH Monosaccharide-sensing protein 1 OS=Arabidopsis thaliana OX=3702 GN=MSSP1 PE=1 SV=2	27.0668	27.0409	27.3401	27.2933	27.4036	27.2608	27.5701	27.421		1.21388	-0.22858
0.0611207	0.762143		sp|O80470|GDL38_ARATH GDSL esterase/lipase At2g23540 OS=Arabidopsis thaliana OX=3702 GN=At2g23540 PE=2 SV=1	27.0378	27.2611	26.7588	26.797	27.6193	27.5091	27.0999	27.1939		1.21381	-0.391867
0.0611243	1.11648	RPS14B	sp|Q9CAX6|RS142_ARATH 40S ribosomal protein S14-2 OS=Arabidopsis thaliana OX=3702 GN=RPS14B PE=1 SV=1	31.4286	31.3412	31.3252	31.4383	31.2506	31.1527	31.1052	31.389		1.21379	0.158954
0.0612432	0.849689	LPR2	sp|Q949X9|LPR2_ARATH Multicopper oxidase LPR2 OS=Arabidopsis thaliana OX=3702 GN=LPR2 PE=2 SV=1	25.1627	25.2483	25.5445	25.2767	25.6035	25.6682	25.5107	25.3898		1.21294	-0.234994
0.0613611	1.09471	PAA1	sp|O81146|PSA6A_ARATH Proteasome subunit alpha type-6-A OS=Arabidopsis thaliana OX=3702 GN=PAA1 PE=1 SV=2	28.9564	28.914	28.8731	28.8225	28.7728	28.8694	28.6307	28.771		1.21211	0.130547
0.0614362	0.879565		sp|Q8LCU7|MECR_ARATH Enoyl-[acyl-carrier-protein] reductase, mitochondrial OS=Arabidopsis thaliana OX=3702 GN=At3g45770 PE=1 SV=1	26.4669	26.722	26.4902	26.346	26.726	26.702	26.6399	26.6978		1.21158	-0.185137
0.0615287	0.853257	RPS27D	sp|Q8L953|RS273_ARATH 40S ribosomal protein S27-3 OS=Arabidopsis thaliana OX=3702 GN=RPS27D PE=2 SV=2	29.239	29.4097	29.2338	29.2883	29.3186	29.5569	29.4592	29.7518		1.21092	-0.228947
0.0615632	1.17574	SGT1B	sp|Q9SUT5|SGT1B_ARATH Protein SGT1 homolog B OS=Arabidopsis thaliana OX=3702 GN=SGT1B PE=1 SV=1	28.1429	27.8681	28.1153	27.9525	27.995	27.7915	27.6246	27.7334		1.21068	0.233563
0.0616204	0.755704	T20K14_160	sp|Q9LF27|WDR12_ARATH Ribosome biogenesis protein WDR12 homolog OS=Arabidopsis thaliana OX=3702 GN=WDR12 PE=1 SV=1	26.2043	26.1294	25.6736	26.3556	26.2541	26.5845	26.4353	26.7054		1.21028	-0.404106
0.0617529	0.87473	AOC4	sp|Q93ZC5|AOC4_ARATH Allene oxide cyclase 4, chloroplastic OS=Arabidopsis thaliana OX=3702 GN=AOC4 PE=2 SV=1	27.9706	27.721	27.9939	28.0122	28.19	28.1761	27.9751	28.1287		1.20934	-0.193091
0.0617563	1.90185	APA3	sp|Q9XEC4|APA3_ARATH Aspartic proteinase A3 OS=Arabidopsis thaliana OX=3702 GN=APA3 PE=2 SV=1	26.031	26.324	26.0526	27.14	25.337	25.7979	24.6438	26.0593		1.20932	0.927405
0.0618376	1.11262	At5g58450	sp|F4KEY9|NAA25_ARATH N-terminal acetyltransferase B complex auxiliary subunit NAA25 OS=Arabidopsis thaliana OX=3702 GN=NAA25 PE=2 SV=1	25.2707	25.3476	25.3784	25.3194	25.1885	25.2431	24.9933	25.2753		1.20875	0.153956
0.0619865	1.13041	ERF1-1	sp|Q39097|ERF1X_ARATH Eukaryotic peptide chain release factor subunit 1-1 OS=Arabidopsis thaliana OX=3702 GN=ERF1-1 PE=1 SV=2	26.8034	26.5176	26.6424	26.6857	26.6007	26.4292	26.3798	26.532		1.2077	0.17684
0.0620273	0.851815	ARP7	sp|Q8L4Y5|ARP7_ARATH Actin-related protein 7 OS=Arabidopsis thaliana OX=3702 GN=ARP7 PE=1 SV=1	26.1402	26.2085	26.0996	26.231	26.2597	26.6784	26.2809	26.3858		1.20742	-0.231388
0.0620549	0.796201	CLC-A	sp|P92941|CLCA_ARATH Chloride channel protein CLC-a OS=Arabidopsis thaliana OX=3702 GN=CLC-A PE=1 SV=2	25.3042	25.371	25.2361	25.7398	25.7362	25.6525	25.5844	25.9932		1.20722	-0.328795
0.062156	1.12735	At5g39730	sp|Q9FIX1|AIGLB_ARATH AIG2-like protein B OS=Arabidopsis thaliana OX=3702 GN=AIG2LB PE=1 SV=1	28.6104	28.5686	28.6632	28.4245	28.4056	28.5468	28.3122	28.3105		1.20652	0.172932
0.0624731	0.845079	FAB2	sp|O22832|STAD7_ARATH Stearoyl-[acyl-carrier-protein] 9-desaturase 7, chloroplastic OS=Arabidopsis thaliana OX=3702 GN=FAB2 PE=1 SV=1	27.4062	27.3393	27.2425	27.4988	27.4767	27.6421	27.4765	27.863		1.20431	-0.242843
0.0625407	1.44379	ATG3	sp|Q0WWQ1|ATG3_ARATH Autophagy-related protein 3 OS=Arabidopsis thaliana OX=3702 GN=ATG3 PE=1 SV=2	26.2637	26.3938	26.2676	26.3735	25.6094	26.0857	25.2382	26.2458		1.20384	0.529864
0.0629069	1.15493	OST1B	sp|Q9ZUA0|OST1B_ARATH Dolichyl-diphosphooligosaccharide--protein glycosyltransferase subunit 1B OS=Arabidopsis thaliana OX=3702 GN=OST1B PE=1 SV=1	28.0573	28.1493	28.1191	28.2351	27.898	27.9811	27.7256	28.1249		1.2013	0.20781
0.0629238	0.902798	RABA1C	sp|Q9FK68|RAA1C_ARATH Ras-related protein RABA1c OS=Arabidopsis thaliana OX=3702 GN=RABA1C PE=1 SV=1	25.7738	25.8277	25.5623	25.7205	25.7987	25.8431	25.937	25.8957		1.20118	-0.147525
0.0629375	0.888391	RS41;RS40	sp|P92965|RS40_ARATH Serine/arginine-rich splicing factor RS40 OS=Arabidopsis thaliana OX=3702 GN=RS40 PE=1 SV=2;sp|P92966|SRS41_ARATH Serine/arginine-rich splicing factor RS41 OS=Arabidopsis thaliana OX=3702 GN=RS41 PE=1 SV=2	26.0489	25.9268	25.7923	26.1192	26.1913	26.1272	26.0918	26.1598		1.20109	-0.170733
0.0633313	1.22565		sp|Q84MB6|DIOX2_ARATH Probable 2-oxoglutarate-dependent dioxygenase At3g50210 OS=Arabidopsis thaliana OX=3702 GN=At3g50210 PE=2 SV=1	26.6193	26.8697	26.6596	26.6675	26.5511	26.4867	26.0644	26.5397		1.19838	0.293553
0.0636434	0.618829		sp|Q9M995|GUN5_ARATH Endoglucanase 5 OS=Arabidopsis thaliana OX=3702 GN=At1g48930 PE=1 SV=1	24.7267	25.1443	24.4692	24.8003	25.3213	26.1683	24.8644	25.5561		1.19625	-0.692388
0.0638038	0.532251	PNP1	sp|Q8GZQ3|PNP1_ARATH Polyribonucleotide nucleotidyltransferase 1, chloroplastic OS=Arabidopsis thaliana OX=3702 GN=PNP1 PE=1 SV=1	23.7891	23.6165	23.8915	22.9136	24.0055	24.0948	25.4506	24.2991		1.19515	-0.909821
0.0638612	0.867987	FIP37	sp|Q9ZSZ8|FIP37_ARATH FKBP12-interacting protein of 37 kDa OS=Arabidopsis thaliana OX=3702 GN=FIP37 PE=1 SV=1	24.784	25.0927	24.9831	24.9112	25.312	25.161	25.0151	25.0999		1.19476	-0.204254
0.0642557	0.823524	F6F3.10	sp|Q9LNJ3|APF2_ARATH Aspartyl protease family protein 2 OS=Arabidopsis thaliana OX=3702 GN=APF2 PE=2 SV=1	27.8173	27.3516	27.42	27.378	27.8135	27.9028	27.7416	27.6294		1.19209	-0.280118
0.0645926	0.639356	FTSH10	sp|Q8VZI8|FTSHA_ARATH ATP-dependent zinc metalloprotease FTSH 10, mitochondrial OS=Arabidopsis thaliana OX=3702 GN=FTSH10 PE=1 SV=1	23.8124	24.9659	25.0307	24.7426	25.21	25.286	25.4098	25.2272		1.18982	-0.645308
0.0646662	1.24363	SSL8	sp|Q9M1J7|SSL8_ARATH Protein STRICTOSIDINE SYNTHASE-LIKE 8 OS=Arabidopsis thaliana OX=3702 GN=SSL8 PE=2 SV=1	28.6226	28.6764	28.6363	28.8787	28.3739	28.2861	28.1542	28.7416		1.18932	0.314561
0.0651893	1.13622	GER2	sp|Q9LMU0|FCL2_ARATH Putative GDP-L-fucose synthase 2 OS=Arabidopsis thaliana OX=3702 GN=GER2 PE=1 SV=1	28.176	28.2485	28.144	28.2865	28.0182	28.0932	27.8274	28.1794		1.18582	0.18424
0.0657933	0.589774		sp|Q8H107|ODO2B_ARATH Dihydrolipoyllysine-residue succinyltransferase component of 2-oxoglutarate dehydrogenase complex 2, mitochondrial OS=Arabidopsis thaliana OX=3702 GN=At4g26910 PE=1 SV=2	25.2953	25.7002	25.7225	25.2278	25.9837	26.3952	27.0408	25.5732		1.18182	-0.761766
0.0658261	0.685298	TTM3	sp|Q9SIY3|TTM3_ARATH Triphosphate tunnel metalloenzyme 3 OS=Arabidopsis thaliana OX=3702 GN=TTM3 PE=1 SV=1	24.6109	24.4614	24.647	23.6774	24.892	25.1282	24.8269	24.7303		1.1816	-0.545196
0.0659532	0.884254	PCAP1	sp|Q96262|PCAP1_ARATH Plasma membrane-associated cation-binding protein 1 OS=Arabidopsis thaliana OX=3702 GN=PCAP1 PE=1 SV=1	29.4988	29.3348	29.5012	29.3004	29.7292	29.5731	29.5994	29.4434		1.18076	-0.177467
0.0665584	1.10901	GRF10	sp|P48347|14310_ARATH 14-3-3-like protein GF14 epsilon OS=Arabidopsis thaliana OX=3702 GN=GRF10 PE=1 SV=1	31.4294	31.3174	31.337	31.4457	31.3132	31.2545	31.0622	31.3025		1.1768	0.149278
0.0671684	0.916427		sp|Q9LKA3|MDHM2_ARATH Malate dehydrogenase 2, mitochondrial OS=Arabidopsis thaliana OX=3702 GN=At3g15020 PE=1 SV=1	29.0214	29.2327	29.2269	29.1695	29.2065	29.3135	29.3273	29.307		1.17284	-0.125909
0.0673111	1.17389	XDH1;XDH2	sp|F4JLI5|XDH2_ARATH Xanthine dehydrogenase 2 OS=Arabidopsis thaliana OX=3702 GN=XDH2 PE=2 SV=1;sp|Q8GUQ8|XDH1_ARATH Xanthine dehydrogenase 1 OS=Arabidopsis thaliana OX=3702 GN=XDH1 PE=1 SV=1	26.4784	26.5492	26.7814	26.4123	26.4248	26.3337	26.4016	26.136		1.17191	0.231295
0.0678796	1.18052	ACLB-1	sp|Q9C522|ACLB1_ARATH ATP-citrate synthase beta chain protein 1 OS=Arabidopsis thaliana OX=3702 GN=ACLB-1 PE=2 SV=1	28.0498	28.0713	27.8988	28.2982	27.8045	27.8624	27.6797	28.0139		1.16826	0.239422
0.0679125	1.30952	AMI1	sp|Q9FR37|AMI1_ARATH Amidase 1 OS=Arabidopsis thaliana OX=3702 GN=AMI1 PE=1 SV=1	24.9207	25.1332	25.3088	25.21	24.7615	24.3659	25.1216	24.7675		1.16805	0.38904
0.0679304	0.821922	PPT1	sp|Q8RXN3|PPT1_ARATH Phosphoenolpyruvate/phosphate translocator 1, chloroplastic OS=Arabidopsis thaliana OX=3702 GN=PPT1 PE=1 SV=1	28.6012	28.1533	28.5881	28.6647	28.8071	28.7879	28.6532	28.8908		1.16794	-0.282927
0.0682394	0.790942		sp|P26568|H11_ARATH Histone H1.1 OS=Arabidopsis thaliana OX=3702 GN=At1g06760 PE=1 SV=1	25.4115	25.2799	25.0153	25.1751	25.2606	25.8175	25.4406	25.7166		1.16597	-0.338356
0.0687168	0.884979	ERD4	sp|Q9C8G5|CSCLD_ARATH CSC1-like protein ERD4 OS=Arabidopsis thaliana OX=3702 GN=ERD4 PE=1 SV=1	27.5523	27.6876	27.4525	27.7152	27.8864	27.7288	27.6616	27.8359		1.16294	-0.176284
0.0687463	0.746273		sp|Q9M2D8|Y3126_ARATH Uncharacterized protein At3g61260 OS=Arabidopsis thaliana OX=3702 GN=At3g61260 PE=1 SV=1	24.9401	25.005	25.2843	25.6929	25.6234	25.4509	25.6787	25.8581		1.16275	-0.422224
0.068767	0.887636	RPL21M	sp|Q8L9A0|RM21_ARATH 50S ribosomal protein L21, mitochondrial OS=Arabidopsis thaliana OX=3702 GN=RPL21M PE=1 SV=1	26.8983	26.864	26.7238	27.0313	27.0523	27.0416	26.9453	27.166		1.16262	-0.171959
0.068777	0.757236	HDT1	sp|Q9FVE6|HDT1_ARATH Histone deacetylase HDT1 OS=Arabidopsis thaliana OX=3702 GN=HDT1 PE=1 SV=1	27.531	27.2964	27.4024	27.6378	27.8453	27.4285	28.2151	27.9835		1.16256	-0.401185
0.0688094	0.846988	TSA1	sp|Q42529|TRPA2_ARATH Tryptophan synthase alpha chain, chloroplastic OS=Arabidopsis thaliana OX=3702 GN=TSA1 PE=1 SV=1	29.2114	29.2921	29.3007	29.2032	29.3576	29.7776	29.3124	29.5181		1.16235	-0.239587
0.0688496	0.894565	LRR-RLK	sp|C0LGN2|Y3148_ARATH Probable leucine-rich repeat receptor-like serine/threonine-protein kinase At3g14840 OS=Arabidopsis thaliana OX=3702 GN=LRR-RLK PE=1 SV=1	26.691	26.7456	26.5217	26.5842	26.7129	26.8787	26.7	26.8939		1.1621	-0.160742
0.0688914	0.735185	AIH	sp|Q8GWW7|AGUA_ARATH Agmatine deiminase OS=Arabidopsis thaliana OX=3702 GN=AIH PE=1 SV=2	25.5087	25.7206	25.5002	25.4258	26.0155	26.3646	25.4578	26.0927		1.16183	-0.443821
0.068896	0.921226	HOS1	sp|Q84JU6|HOS1_ARATH E3 ubiquitin-protein ligase HOS1 OS=Arabidopsis thaliana OX=3702 GN=HOS1 PE=1 SV=1	24.5894	24.7147	24.7361	24.7158	24.8314	24.817	24.6915	24.8894		1.16181	-0.118372
0.0689011	1.31066	ACO4	sp|Q06588|ACCO4_ARATH 1-aminocyclopropane-1-carboxylate oxidase 4 OS=Arabidopsis thaliana OX=3702 GN=ACO4 PE=1 SV=2	26.7209	26.9949	26.9045	26.7608	26.3292	26.8673	26.5331	26.0903		1.16177	0.390293
0.0689643	1.11497	GDH1	sp|Q43314|DHE1_ARATH Glutamate dehydrogenase 1 OS=Arabidopsis thaliana OX=3702 GN=GDH1 PE=1 SV=1	29.8034	29.746	29.7271	29.8991	29.6796	29.703	29.4591	29.7059		1.16138	0.157008
0.0691488	1.14613	PP2A1	sp|Q07099|PP2A1_ARATH Serine/threonine-protein phosphatase PP2A-1 catalytic subunit OS=Arabidopsis thaliana OX=3702 GN=PP2A1 PE=1 SV=1	26.9913	27.01	27.174	26.835	26.9078	26.8291	26.6465	26.8398		1.16022	0.196769
0.069262	1.18423	P4H2	sp|F4JAU3|P4H2_ARATH Prolyl 4-hydroxylase 2 OS=Arabidopsis thaliana OX=3702 GN=P4H2 PE=1 SV=1	27.4477	27.4854	27.4617	27.7779	27.2803	27.1563	27.2416	27.5186		1.15951	0.243949
0.0692705	1.08027	NDK1	sp|P39207|NDK1_ARATH Nucleoside diphosphate kinase 1 OS=Arabidopsis thaliana OX=3702 GN=NDK1 PE=1 SV=1	31.52	31.5011	31.4159	31.572	31.3983	31.4232	31.2816	31.4605		1.15945	0.111388
0.0693681	1.72014	UGT71C4	sp|Q9LML6|U71C4_ARATH Flavonol 3-O-glucosyltransferase UGT71C4 OS=Arabidopsis thaliana OX=3702 GN=UGT71C4 PE=1 SV=2	25.2058	25.5628	25.3568	25.3387	25.1913	25.1697	24.0777	23.8953		1.15884	0.782526
0.0694218	1.10445	F16B3.29	sp|Q9M876|SYYM_ARATH Tyrosine--tRNA ligase, chloroplastic/mitochondrial OS=Arabidopsis thaliana OX=3702 GN=EMB2768 PE=2 SV=1	25.8752	26.0164	25.8205	25.8602	25.7453	25.6763	25.6881	25.8894		1.1585	0.143329
0.0695923	1.41445	Dr4	sp|Q39091|KTI1_ARATH Kunitz trypsin inhibitor 1 OS=Arabidopsis thaliana OX=3702 GN=KTI1 PE=2 SV=1	26.3141	26.3857	25.8494	26.39	26.2321	25.5242	25.3875	25.7943		1.15744	0.500245
0.0698236	1.38801	UGE5	sp|Q9SN58|UGE5_ARATH UDP-glucose 4-epimerase 5 OS=Arabidopsis thaliana OX=3702 GN=UGE5 PE=1 SV=3	26.5361	26.8171	26.9982	26.1109	26.1365	26.3167	26.2328	25.8842		1.156	0.473019
0.0699081	1.1381	APT1	sp|P31166|APT1_ARATH Adenine phosphoribosyltransferase 1, chloroplastic OS=Arabidopsis thaliana OX=3702 GN=APT1 PE=1 SV=2	29.2985	29.1708	29.4039	29.3655	28.9989	29.201	29.0191	29.2731		1.15547	0.186631
0.0699535	1.21249	SYT5	sp|Q8L706|SYT5_ARATH Synaptotagmin-5 OS=Arabidopsis thaliana OX=3702 GN=SYT5 PE=2 SV=1	27.7988	27.93	27.5998	27.9935	27.6946	27.602	27.2841	27.6295		1.15519	0.277973
0.0700869	0.849691	FTSH11	sp|Q9FGM0|FTSHB_ARATH ATP-dependent zinc metalloprotease FTSH 11, chloroplastic/mitochondrial OS=Arabidopsis thaliana OX=3702 GN=FTSH11 PE=1 SV=1	25.4059	25.4229	25.1642	25.4968	25.7533	25.3892	25.6816	25.6056		1.15436	-0.234991
0.0700878	0.867617	MSI4	sp|O22607|MSI4_ARATH WD-40 repeat-containing protein MSI4 OS=Arabidopsis thaliana OX=3702 GN=MSI4 PE=1 SV=3	27.3045	27.0056	27.1713	27.1339	27.3454	27.168	27.4352	27.4862		1.15436	-0.20487
0.0701732	1.12792	PVA21	sp|Q9LVU1|VAP21_ARATH Vesicle-associated protein 2-1 OS=Arabidopsis thaliana OX=3702 GN=PVA21 PE=1 SV=1	25.6535	25.78	25.7477	25.5166	25.5996	25.4077	25.4127	25.5831		1.15383	0.173666
0.0702452	0.809695	MSR4	sp|P54150|MSRA4_ARATH Peptide methionine sulfoxide reductase A4, chloroplastic OS=Arabidopsis thaliana OX=3702 GN=MSR4 PE=1 SV=2	27.3184	27.194	27.4318	27.6127	27.5659	27.6665	28.0019	27.5409		1.15338	-0.30455
0.0704462	0.510118		sp|Q8VYP2|TAT4_ARATH Probable aminotransferase TAT4 OS=Arabidopsis thaliana OX=3702 GN=At4g23590 PE=2 SV=1	24.4737	24.4666	24.2024	24.7973	25.1965	25.5779	24.5062	26.5438		1.15214	-0.971097
0.0707175	1.12583	4CLL9	sp|Q84P23|4CLL9_ARATH 4-coumarate--CoA ligase-like 9 OS=Arabidopsis thaliana OX=3702 GN=4CLL9 PE=1 SV=2	25.4709	25.525	25.3959	25.5523	25.4702	25.2418	25.1603	25.3878		1.15047	0.170987
0.070741	0.789674	VHA-E3	sp|P0CAN7|VATE3_ARATH V-type proton ATPase subunit E3 OS=Arabidopsis thaliana OX=3702 GN=VHA-E3 PE=2 SV=1	26.0566	25.8919	25.6887	26.2306	26.3449	26.3563	26.0183	26.5111		1.15033	-0.340671
0.0708625	0.912716	LPD1	sp|Q9M5K3|DLDH1_ARATH Dihydrolipoyl dehydrogenase 1, mitochondrial OS=Arabidopsis thaliana OX=3702 GN=LPD1 PE=1 SV=2	28.7713	28.7925	28.8214	28.7148	28.9023	28.8742	29.0585	28.792		1.14958	-0.131762
0.0708707	1.16999	UGT74D1	sp|Q9SKC5|U74D1_ARATH UDP-glycosyltransferase 74D1 OS=Arabidopsis thaliana OX=3702 GN=UGT74D1 PE=1 SV=1	28.3045	28.3505	28.3541	28.3106	27.9944	27.9667	28.0457	28.407		1.14953	0.22649
0.0710194	0.879428	PAP2	sp|Q9LMG7|PPA2_ARATH Probable inactive purple acid phosphatase 2 OS=Arabidopsis thaliana OX=3702 GN=PAP2 PE=2 SV=1	26.055	25.8072	26.0087	26.0676	26.3298	26.1883	26.0682	26.0938		1.14862	-0.185363
0.0710712	0.599547	RALFL33;RALF23	sp|Q8L9P8|RLF33_ARATH Protein RALF-like 33 OS=Arabidopsis thaliana OX=3702 GN=RALFL33 PE=2 SV=1;sp|Q9LUS7|RLF23_ARATH Rapid alkalinization factor 23 OS=Arabidopsis thaliana OX=3702 GN=RALF23 PE=1 SV=1	25.5934	25.3326	25.5032	25.6897	26.1902	27.2121	25.9356	25.7333		1.14831	-0.738055
0.0710996	0.851836	EMB1796	sp|Q9M3A8|PP273_ARATH Pentatricopeptide repeat-containing protein At3g49240, mitochondrial OS=Arabidopsis thaliana OX=3702 GN=EMB1796 PE=1 SV=1	26.042	26.0623	25.8224	26.0661	26.3779	26.2415	25.98	26.3187		1.14813	-0.231352
0.0713224	1.20055	ICDH	sp|Q9SLK0|ICDHX_ARATH Peroxisomal isocitrate dehydrogenase [NADP] OS=Arabidopsis thaliana OX=3702 GN=ICDH PE=1 SV=1	26.5939	26.7452	26.811	26.4089	26.386	26.6002	26.2791	26.2391		1.14677	0.263693
0.0713386	1.10024	NTF2	sp|Q9C7F5|NTF2B_ARATH Nuclear transport factor 2B OS=Arabidopsis thaliana OX=3702 GN=NTF2B PE=1 SV=1	29.9844	29.9697	29.9915	29.9154	29.7259	29.9562	29.722	29.9056		1.14668	0.137817
0.0713809	1.21696	GSTU19	sp|Q9ZRW8|GSTUJ_ARATH Glutathione S-transferase U19 OS=Arabidopsis thaliana OX=3702 GN=GSTU19 PE=1 SV=1	32.5443	32.5522	32.7288	32.3022	32.3188	32.1785	32.4715	32.0256		1.14642	0.283281
0.0714331	0.93621		sp|P83483|ATPBM_ARATH ATP synthase subunit beta-1, mitochondrial OS=Arabidopsis thaliana OX=3702 GN=At5g08670 PE=1 SV=1;sp|P83484|ATPBN_ARATH ATP synthase subunit beta-2, mitochondrial OS=Arabidopsis thaliana OX=3702 GN=At5g08690 PE=1 SV=1;sp|Q9C5A9|ATPBO_	32.4012	32.3619	32.4179	32.295	32.4292	32.4724	32.5552	32.3996		1.1461	-0.0950956
0.0715481	1.16597	At3g54250	sp|F4JCU3|MVD2_ARATH Diphosphomevalonate decarboxylase MVD2, peroxisomal OS=Arabidopsis thaliana OX=3702 GN=MVD2 PE=1 SV=1	25.9302	26.0103	25.8869	25.7557	25.4716	25.8182	25.59	25.8172		1.1454	0.221537
0.0718697	0.821595	SAE2	sp|Q9SJT1|SAE2_ARATH SUMO-activating enzyme subunit 2 OS=Arabidopsis thaliana OX=3702 GN=SAE2 PE=1 SV=1	26.9091	26.8824	26.483	26.9235	27.0938	27.2465	26.8816	27.1102		1.14345	-0.283501
0.0718844	1.18663		sp|Q8LGG8|USPAL_ARATH Universal stress protein A-like protein OS=Arabidopsis thaliana OX=3702 GN=At3g01520 PE=1 SV=2	27.7034	27.7013	27.5317	27.5174	27.6181	27.4408	27.1986	27.2087		1.14337	0.246876
0.0719113	0.851721	RBG4	sp|Q9LIS2|RBG4_ARATH Glycine-rich RNA-binding protein 4, mitochondrial OS=Arabidopsis thaliana OX=3702 GN=RBG4 PE=2 SV=1	28.2648	27.947	27.8971	28.2874	28.3376	28.3585	28.2545	28.3719		1.1432	-0.231548
0.0719403	1.1526	PVA11	sp|Q8VZ95|VAP11_ARATH Vesicle-associated protein 1-1 OS=Arabidopsis thaliana OX=3702 GN=PVA11 PE=1 SV=1	28.4813	28.3476	28.2987	28.332	28.2026	28.1631	27.9326	28.3417		1.14303	0.204894
0.0719422	0.865089	RH21	sp|P93008|RH21_ARATH DEAD-box ATP-dependent RNA helicase 21 OS=Arabidopsis thaliana OX=3702 GN=RH21 PE=2 SV=1	24.5466	24.6102	24.4073	24.3054	24.5945	24.8707	24.5819	24.6586		1.14302	-0.209079
0.0720343	1.25533	RKL1	sp|Q9LP77|Y1848_ARATH Probable inactive receptor kinase At1g48480 OS=Arabidopsis thaliana OX=3702 GN=RKL1 PE=1 SV=1	25.5533	25.03	25.0879	25.5267	25.0613	24.8708	24.8768	25.0766		1.14246	0.328071
0.0722546	1.16168	PNG1	sp|Q9FGY9|PNG1_ARATH Peptide-N(4)-(N-acetyl-beta-glucosaminyl)asparagine amidase OS=Arabidopsis thaliana OX=3702 GN=PNG1 PE=2 SV=1	25.3666	25.3464	25.2657	24.9797	24.9297	24.9706	25.0874	25.1059		1.14113	0.216213
0.0723023	0.905423	RH14	sp|Q8H136|RH14_ARATH DEAD-box ATP-dependent RNA helicase 14 OS=Arabidopsis thaliana OX=3702 GN=RH14 PE=1 SV=2	26.2275	26.2356	26.1441	26.1147	26.3248	26.304	26.191	26.4756		1.14085	-0.143336
0.0726833	1.20968	NPF6.3	sp|Q05085|PTR7_ARATH Protein NRT1/ PTR FAMILY 6.3 OS=Arabidopsis thaliana OX=3702 GN=NPF6.3 PE=1 SV=1	25.9279	26.1732	25.6748	25.9677	25.7739	25.4602	25.6386	25.7723		1.13857	0.274631
0.0731635	0.859249		sp|Q9C6I8|NOG1_ARATH Nucleolar GTP-binding protein 1 OS=Arabidopsis thaliana OX=3702 GN=At1g50920 PE=2 SV=1	26.5298	26.7497	26.3907	26.5922	26.8628	26.7571	26.6048	26.9131		1.13571	-0.218851
0.0733982	1.13618		sp|Q8LEB2|ADHL6_ARATH Alcohol dehydrogenase-like 6 OS=Arabidopsis thaliana OX=3702 GN=At5g24760 PE=2 SV=2	25.0277	25.0499	24.9061	24.8274	24.7793	24.9227	24.5958	24.7765		1.13431	0.184197
0.0737645	1.10564	PAHX	sp|Q9ZVF6|PAHX_ARATH Phytanoyl-CoA dioxygenase OS=Arabidopsis thaliana OX=3702 GN=PAHX PE=2 SV=2	25.8931	25.8345	26.0216	25.8939	25.7272	25.7306	25.6812	25.9247		1.13215	0.144885
0.0739395	0.891891		sp|Q9LVQ8|P2C80_ARATH Probable protein phosphatase 2C 80 OS=Arabidopsis thaliana OX=3702 GN=At5g66720 PE=2 SV=1	27.2501	27.0708	27.2239	27.1695	27.5363	27.3123	27.263	27.2628		1.13112	-0.165061
0.073986	0.886408	RPL7B	sp|P60040|RL72_ARATH 60S ribosomal protein L7-2 OS=Arabidopsis thaliana OX=3702 GN=RPL7B PE=1 SV=1	31.6154	31.6782	31.4693	31.6927	31.8371	31.8059	31.6102	31.8983		1.13085	-0.173957
0.0740429	0.758106	POT3	sp|Q9FE38|POT3_ARATH Potassium transporter 3 OS=Arabidopsis thaliana OX=3702 GN=POT3 PE=1 SV=1	24.2436	24.8982	24.6138	24.813	25.0781	25.3412	24.8083	24.9391		1.13052	-0.399529
0.0741305	1.16593	At2g33840	sp|Q8S9J2|SYYC1_ARATH Tyrosine--tRNA ligase 1, cytoplasmic OS=Arabidopsis thaliana OX=3702 GN=At2g33840 PE=2 SV=1	26.6931	26.7007	26.5426	26.6693	26.5136	26.485	26.1481	26.573		1.13	0.22148
0.0744281	1.10527	ATJ3	sp|Q94AW8|DNAJ3_ARATH Chaperone protein dnaJ 3 OS=Arabidopsis thaliana OX=3702 GN=ATJ3 PE=1 SV=2	29.1965	29.1295	29.1579	29.2195	29.1002	29.0107	28.8614	29.1536		1.12826	0.1444
0.0745153	1.09373	PRS5	sp|O64888|KPRS5_ARATH Ribose-phosphate pyrophosphokinase 5, chloroplastic OS=Arabidopsis thaliana OX=3702 GN=PRS5 PE=2 SV=2	26.6048	26.4909	26.5141	26.6094	26.3978	26.4781	26.2946	26.5316		1.12775	0.129252
0.0745307	0.570002	JAL41	sp|Q9FGC5|JAL41_ARATH Jacalin-related lectin 41 OS=Arabidopsis thaliana OX=3702 GN=JAL41 PE=1 SV=1	24.3319	23.5256	23.8217	24.1793	24.9783	25.1061	23.7977	25.2202		1.12766	-0.810961
0.0749189	1.14274	XI-2	sp|Q9LKB9|MYO6_ARATH Myosin-6 OS=Arabidopsis thaliana OX=3702 GN=XI-2 PE=1 SV=1	26.1226	25.9568	25.944	25.8084	25.8908	25.6275	25.6959	25.8478		1.12541	0.192492
0.0750285	1.16519	CLC-C	sp|Q96282|CLCC_ARATH Chloride channel protein CLC-c OS=Arabidopsis thaliana OX=3702 GN=CLC-C PE=1 SV=1	25.849	26.0394	26.1044	25.6773	25.7108	25.6013	25.7117	25.764		1.12477	0.220568
0.0753209	0.851287	2003-04-01	sp|P92980|APR3_ARATH 5-adenylylsulfate reductase 3, chloroplastic OS=Arabidopsis thaliana OX=3702 GN=APR3 PE=2 SV=2	25.7928	26.1824	25.9702	26.0756	26.0743	26.1705	26.3503	26.355		1.12308	-0.232282
0.0753983	0.866696		sp|Q8VYR5|PP351_ARATH Pentatricopeptide repeat-containing protein At4g35850, mitochondrial OS=Arabidopsis thaliana OX=3702 GN=At4g35850 PE=1 SV=1	27.2804	27.1917	27.1829	27.2687	27.3289	27.5544	27.236	27.6301		1.12264	-0.206402
0.0756108	1.11246	SAHH1	sp|O23255|SAHH1_ARATH Adenosylhomocysteinase 1 OS=Arabidopsis thaliana OX=3702 GN=SAHH1 PE=1 SV=1	32.3426	32.5274	32.4073	32.5728	32.2753	32.2195	32.2951	32.4451		1.12142	0.153757
0.0758258	1.32326	MLP329	sp|Q9ZVF2|ML329_ARATH MLP-like protein 329 OS=Arabidopsis thaliana OX=3702 GN=MLP329 PE=2 SV=1	31.3812	31.1364	30.9881	30.8189	31.0945	30.6492	30.4314	30.5331		1.12018	0.404097
0.0758816	0.364813	CML20	sp|O82659|CML20_ARATH Probable calcium-binding protein CML20 OS=Arabidopsis thaliana OX=3702 GN=CML20 PE=1 SV=1	26.0696	23.3934	25.7904	23.8396	26.1013	26.3076	26.1571	26.3462		1.11986	-1.45477
0.0758901	1.12275		sp|Q8L828|COB23_ARATH Coatomer subunit beta-3 OS=Arabidopsis thaliana OX=3702 GN=At3g15980 PE=2 SV=1	26.7163	26.7757	26.6252	26.7821	26.633	26.4162	26.4702	26.7117		1.11981	0.16704
0.0759894	0.785855	F6N23.9	sp|Q8W4L3|BSK3_ARATH Serine/threonine-protein kinase BSK3 OS=Arabidopsis thaliana OX=3702 GN=BSK3 PE=1 SV=1	25.2131	24.9343	25.0119	25.0827	25.7105	25.2741	25.0496	25.5984		1.11925	-0.347665
0.0760591	0.900442	FTSH4	sp|O80983|FTSH4_ARATH ATP-dependent zinc metalloprotease FTSH 4, mitochondrial OS=Arabidopsis thaliana OX=3702 GN=FTSH4 PE=1 SV=2	26.5983	26.5626	26.7565	26.7879	26.7523	26.8735	26.7593	26.9255		1.11885	-0.151294
0.0761874	1.23783		sp|Q9FH04|ADHL7_ARATH Alcohol dehydrogenase-like 7 OS=Arabidopsis thaliana OX=3702 GN=At5g42250 PE=2 SV=1	26.6887	26.822	27.1891	26.6005	26.5571	26.5506	26.6245	26.3368		1.11812	0.307816
0.0763087	1.41879	CYP71B23	sp|Q9LTM0|C71BN_ARATH Cytochrome P450 71B23 OS=Arabidopsis thaliana OX=3702 GN=CYP71B23 PE=2 SV=1	25.0835	25.4479	25.2856	24.8721	24.8502	25.1422	24.2801	24.3979		1.11743	0.504658
0.0764744	1.1433	PMM	sp|O80840|PMM_ARATH Phosphomannomutase OS=Arabidopsis thaliana OX=3702 GN=PMM PE=1 SV=1	28.7361	28.7161	28.8119	29.0325	28.5303	28.713	28.5451	28.7353		1.11648	0.19321
0.0764769	1.21695	P4H10	sp|F4JZ24|P4H10_ARATH Probable prolyl 4-hydroxylase 10 OS=Arabidopsis thaliana OX=3702 GN=P4H10 PE=3 SV=1	25.1621	25.4048	25.1608	25.4588	25.3289	24.9194	24.8614	24.9437		1.11647	0.283268
0.0765299	1.14948	MPK8	sp|Q9LM33|MPK8_ARATH Mitogen-activated protein kinase 8 OS=Arabidopsis thaliana OX=3702 GN=MPK8 PE=1 SV=2	26.9539	26.9633	27.0997	27.1471	26.965	26.6339	26.7897	26.9715		1.11617	0.200982
0.0765419	0.852972	LPD2	sp|F4JLP5|PLPD2_ARATH Dihydrolipoyl dehydrogenase 2, chloroplastic OS=Arabidopsis thaliana OX=3702 GN=LPD2 PE=2 SV=2	28.0363	27.9352	27.9537	28.3428	28.2577	28.1868	28.3129	28.4283		1.1161	-0.22943
0.0766756	0.875069	DIT2-1	sp|Q9FMF7|DIT21_ARATH Dicarboxylate transporter 2.1, chloroplastic OS=Arabidopsis thaliana OX=3702 GN=DIT2-1 PE=1 SV=1	27.0827	27.0882	27.0447	26.9629	27.2619	27.2974	27.3944	26.9951		1.11534	-0.192531
0.0766967	1.08048	EBP1	sp|Q96327|EBP1_ARATH ERBB-3 BINDING PROTEIN 1 OS=Arabidopsis thaliana OX=3702 GN=EBP1 PE=1 SV=1	29.698	29.6462	29.6118	29.7333	29.6198	29.559	29.4346	29.6292		1.11522	0.111667
0.0767141	0.853597	IMDH2	sp|P93832|LEU32_ARATH 3-isopropylmalate dehydrogenase 2, chloroplastic OS=Arabidopsis thaliana OX=3702 GN=IMDH2 PE=1 SV=1	27.6551	27.8245	27.8901	28.0138	27.8499	28.1833	28.1049	28.1589		1.11512	-0.228374
0.0769995	1.18739	PDC2	sp|Q9FFT4|PDC2_ARATH Pyruvate decarboxylase 2 OS=Arabidopsis thaliana OX=3702 GN=PDC2 PE=2 SV=1	27.1238	27.1451	27.2975	26.9158	27.0252	26.9369	26.9014	26.6276		1.11351	0.247792
0.0770121	1.81321		sp|Q5RJC5|C3H67_ARATH Zinc finger CCCH domain-containing protein 67 OS=Arabidopsis thaliana OX=3702 GN=At5g63260 PE=2 SV=2	25.3078	25.2853	25.4217	25.445	23.8489	25.2866	23.7823	25.1078		1.11344	0.858544
0.0770263	0.828265	RSZ22	sp|O81126|RSZ22_ARATH Serine/arginine-rich splicing factor RSZ22 OS=Arabidopsis thaliana OX=3702 GN=RSZ22 PE=1 SV=1	28.15	28.0591	27.9853	28.3083	28.5914	28.4088	28.097	28.4929		1.11336	-0.271836
0.0771432	0.67332	POSF21	sp|Q04088|POF21_ARATH Probable transcription factor PosF21 OS=Arabidopsis thaliana OX=3702 GN=POSF21 PE=2 SV=1	25.4672	24.6909	24.3084	24.5683	25.5262	25.1699	25.1519	25.4693		1.1127	-0.570636
0.0773111	1.09089		sp|Q9ASR4|BCAL2_ARATH Branched-chain-amino-acid aminotransferase-like protein 2 OS=Arabidopsis thaliana OX=3702 GN=At5g27410 PE=2 SV=1	26.9888	27.0803	27.0253	26.855	26.7709	26.847	26.914	26.9155		1.11176	0.1255
0.0774422	1.09266	PAF1	sp|P34066|PSA1A_ARATH Proteasome subunit alpha type-1-A OS=Arabidopsis thaliana OX=3702 GN=PAF1 PE=1 SV=3	29.4918	29.3473	29.5782	29.4366	29.3204	29.2417	29.3821	29.3983		1.11102	0.127848
0.0774545	1.07732	TIF3I1	sp|Q38884|EIF3I_ARATH Eukaryotic translation initiation factor 3 subunit I OS=Arabidopsis thaliana OX=3702 GN=TIF3I1 PE=2 SV=2	29.1325	29.1215	29.0085	29.0867	29.0298	28.9091	28.9082	29.0723		1.11095	0.107446
0.0775842	1.15451	At5g28050	sp|Q94BU8|GSDA_ARATH Guanosine deaminase OS=Arabidopsis thaliana OX=3702 GN=GSDA PE=1 SV=1	29.3679	29.2028	29.3031	29.5665	29.127	29.1722	29.0105	29.3015		1.11023	0.207282
0.0778496	0.76194	SYP132	sp|Q8VZU2|SY132_ARATH Syntaxin-132 OS=Arabidopsis thaliana OX=3702 GN=SYP132 PE=1 SV=1	25.7498	25.8755	25.4224	26.1008	25.9287	26.2046	26.0924	26.4918		1.10874	-0.39225
0.0780804	0.829281	FH	sp|Q9ZR07|FRDA_ARATH Frataxin, mitochondrial OS=Arabidopsis thaliana OX=3702 GN=FH PE=1 SV=2	26.0584	26.0981	26.3448	25.9474	26.3588	26.6157	26.1489	26.4056		1.10746	-0.270067
0.0781328	0.90101		sp|P53780|METC_ARATH Cystathionine beta-lyase, chloroplastic OS=Arabidopsis thaliana OX=3702 GN=At3g57050 PE=1 SV=1	27.4006	27.4182	27.2882	27.2316	27.4179	27.6492	27.4377	27.4353		1.10717	-0.150385
0.078206	1.17418	CYT1	sp|O22287|GMPP1_ARATH Mannose-1-phosphate guanylyltransferase 1 OS=Arabidopsis thaliana OX=3702 GN=CYT1 PE=1 SV=1	27.3173	27.5195	27.2784	27.4394	27.2489	27.2914	26.8794	27.2084		1.10676	0.231648
0.0782315	0.908903	AOC3	sp|Q9LS01|AOC3_ARATH Allene oxide cyclase 3, chloroplastic OS=Arabidopsis thaliana OX=3702 GN=AOC3 PE=2 SV=1	28.1404	28.0163	27.9318	28.1277	28.1924	28.2717	28.0748	28.2285		1.10662	-0.137802
0.0783486	2.40938	RER1B	sp|O48671|RER1B_ARATH Protein RER1B OS=Arabidopsis thaliana OX=3702 GN=RER1B PE=1 SV=2	26.5467	26.5111	26.3943	26.2353	25.7379	23.3956	25.4929	25.9864		1.10597	1.26866
0.0785926	0.770548	ACP3	sp|P25702|ACP3_ARATH Acyl carrier protein 3, chloroplastic OS=Arabidopsis thaliana OX=3702 GN=ACP3 PE=1 SV=2	30.142	29.7438	29.8101	30.2546	30.1631	30.1855	30.3967	30.7093		1.10462	-0.376042
0.0785956	1.27185	HDA5	sp|Q8RX28|HDA5_ARATH Histone deacetylase 5 OS=Arabidopsis thaliana OX=3702 GN=HDA5 PE=1 SV=1	25.7957	25.5277	25.4974	25.0478	25.2539	25.1423	25.0838	25.001		1.1046	0.346926
0.0786821	1.27875	VAC14	sp|Q9ZU97|VAC14_ARATH Protein VAC14 homolog OS=Arabidopsis thaliana OX=3702 GN=VAC14 PE=1 SV=2	25.9432	26.055	26.1518	26.3209	25.5749	26.0725	25.4555	25.949		1.10412	0.354731
0.0786934	0.780676	FER3	sp|Q9LYN2|FRI3_ARATH Ferritin-3, chloroplastic OS=Arabidopsis thaliana OX=3702 GN=FER3 PE=1 SV=1	28.3123	28.2847	28.0672	28.6889	28.5068	28.6522	28.6146	29.0083		1.10406	-0.357204
0.0787102	1.3841	PEX19-2	sp|Q94EI3|PE192_ARATH Peroxisome biogenesis protein 19-2 OS=Arabidopsis thaliana OX=3702 GN=PEX19-2 PE=1 SV=1	25.1123	25.1175	25.1061	25.2763	24.5469	24.1563	25.1755	24.8577		1.10397	0.468943
0.0788717	0.589157	PER12	sp|Q96520|PER12_ARATH Peroxidase 12 OS=Arabidopsis thaliana OX=3702 GN=PER12 PE=1 SV=1	25.6485	25.1877	25.303	25.6139	25.6018	26.1384	27.1748	25.8911		1.10308	-0.763276
0.078884	0.913522	CALS10	sp|Q9SJM0|CALSA_ARATH Callose synthase 10 OS=Arabidopsis thaliana OX=3702 GN=CALS10 PE=2 SV=5	26.1312	25.862	25.9915	26.0373	26.0871	26.0954	26.1742	26.1872		1.10301	-0.130488
0.0790633	1.31908	UGT73B1	sp|Q8VZE9|U73B1_ARATH UDP-glycosyltransferase 73B1 OS=Arabidopsis thaliana OX=3702 GN=UGT73B1 PE=2 SV=1	27.0172	27.3197	27.4137	26.8387	26.9557	26.5661	26.9989	26.4704		1.10203	0.399527
0.0792314	0.28367	NUDT26	sp|Q9CAF2|NUD26_ARATH Nudix hydrolase 26, chloroplastic OS=Arabidopsis thaliana OX=3702 GN=NUDT26 PE=1 SV=1	25.161	22.6432	26.1251	22.8806	25.8127	26.1765	25.9189	26.1726		1.1011	-1.81771
0.0799271	1.2002	SRP14	sp|O04421|SRP14_ARATH Signal recognition particle 14 kDa protein OS=Arabidopsis thaliana OX=3702 GN=SRP14 PE=2 SV=2	26.2955	26.4292	26.0005	26.3562	26.0486	25.9699	25.8068	26.2031		1.09731	0.263278
0.0802018	0.90016	SSL12	sp|P94111|SSL12_ARATH Protein STRICTOSIDINE SYNTHASE-LIKE 12 OS=Arabidopsis thaliana OX=3702 GN=SSL12 PE=2 SV=2	29.496	29.6035	29.6514	29.4222	29.7612	29.7994	29.5944	29.625		1.09582	-0.151747
0.0803431	2.70461	DDL	sp|Q8W4D8|DDL_ARATH FHA domain-containing protein DDL OS=Arabidopsis thaliana OX=3702 GN=DDL PE=1 SV=1	25.8754	25.7748	25.679	24.2614	22.7987	24.011	23.5495	25.4897		1.09505	1.43542
0.0806906	1.22067	PDX2	sp|Q8LAD0|PDX2_ARATH Probable pyridoxal 5-phosphate synthase subunit PDX2 OS=Arabidopsis thaliana OX=3702 GN=PDX2 PE=1 SV=1	26.3478	26.345	26.5102	25.9603	26.0912	26.1138	26.0095	25.7981		1.09318	0.287678
0.0808465	1.13059	OPR1	sp|Q8LAH7|OPR1_ARATH 12-oxophytodienoate reductase 1 OS=Arabidopsis thaliana OX=3702 GN=OPR1 PE=1 SV=2	30.6565	30.7209	30.9177	30.5227	30.5338	30.4734	30.5659	30.5364		1.09234	0.177073
0.080906	0.812353	T15N1_10	sp|Q9LYK7|PESC_ARATH Pescadillo homolog OS=Arabidopsis thaliana OX=3702 GN=PES PE=1 SV=1	26.0043	25.9858	25.9332	26.1288	26.3099	26.151	26.091	26.6995		1.09202	-0.299821
0.0813453	1.19717	MNS1	sp|Q9C512|MNS1_ARATH Mannosyl-oligosaccharide 1,2-alpha-mannosidase MNS1 OS=Arabidopsis thaliana OX=3702 GN=MNS1 PE=1 SV=1	25.1485	25.5563	25.424	25.2282	25.0575	25.3188	24.9542	24.9882		1.08967	0.259622
0.0813499	1.3058	FTA	sp|Q9LX33|FNTA_ARATH Protein farnesyltransferase/geranylgeranyltransferase type-1 subunit alpha OS=Arabidopsis thaliana OX=3702 GN=FTA PE=1 SV=2	26.086	26.5606	26.8538	26.6375	25.924	26.2638	26.101	26.3093		1.08964	0.384929
0.0814934	0.479017	LCD	sp|Q9M1R1|LCYD1_ARATH L-cysteine desulfhydrase OS=Arabidopsis thaliana OX=3702 GN=LCD PE=2 SV=1	24.585	23.1885	25.2622	23.3013	25.0783	25.034	25.298	25.1741		1.08888	-1.06185
0.0815117	0.828381	SRK2A	sp|P43291|SRK2A_ARATH Serine/threonine-protein kinase SRK2A OS=Arabidopsis thaliana OX=3702 GN=SRK2A PE=1 SV=1	25.0264	25.2024	25.2169	24.9973	25.4622	25.6726	25.2412	25.1536		1.08878	-0.271633
0.0816382	1.10099	F3C22_130	sp|Q9LXJ2|QCR9_ARATH Cytochrome b-c1 complex subunit 9, mitochondrial OS=Arabidopsis thaliana OX=3702 GN=QCR9 PE=1 SV=1	29.6246	29.697	29.5678	29.4977	29.551	29.535	29.338	29.4079		1.08811	0.138795
0.0818203	0.859109		sp|Q8RY73|DXO_ARATH NAD-capped RNA hydrolase DXO1 OS=Arabidopsis thaliana OX=3702 GN=DXO1 PE=1 SV=1	24.5592	24.6609	24.7035	24.2747	24.76	24.8646	24.6646	24.7854		1.08714	-0.219087
0.0821953	0.736501	EXL4	sp|Q9FY71|EXOL4_ARATH Protein EXORDIUM-like 4 OS=Arabidopsis thaliana OX=3702 GN=EXL4 PE=2 SV=1	25.5529	25.7043	25.5565	25.8185	26.0007	26.6196	25.6446	26.1323		1.08515	-0.441241
0.0823316	0.808788	VHA-F	sp|Q9ZQX4|VATF_ARATH V-type proton ATPase subunit F OS=Arabidopsis thaliana OX=3702 GN=VHA-F PE=2 SV=1	28.5018	28.515	28.3145	28.6484	28.8069	28.4756	28.81	29.1118		1.08443	-0.306166
0.0828386	0.882213	AHB2	sp|O24521|HBL2_ARATH Non-symbiotic hemoglobin 2 OS=Arabidopsis thaliana OX=3702 GN=AHB2 PE=1 SV=1	27.1509	27.2313	27.2614	27.2384	27.2773	27.259	27.6141	27.4548		1.08177	-0.180801
0.0828594	0.823018	EBM	sp|Q75W54|EBM_ARATH Mannosylglycoprotein endo-beta-mannosidase OS=Arabidopsis thaliana OX=3702 GN=EBM PE=1 SV=3	26.2791	26.4824	26.086	26.2032	26.7614	26.6755	26.2978	26.4401		1.08166	-0.281003
0.0829838	1.08956	VCR	sp|Q9LTT9|VCR_ARATH Varicose-related protein OS=Arabidopsis thaliana OX=3702 GN=VCR PE=2 SV=1	25.1792	25.2406	25.0503	25.1894	25.1483	25.0132	24.9403	25.0627		1.08101	0.123741
0.0831807	1.26845		sp|Q2HIM5|MMGT_ARATH Membrane magnesium transporter OS=Arabidopsis thaliana OX=3702 GN=At5g03345 PE=3 SV=1	27.7004	27.4138	27.5566	27.6936	27.3191	27.3461	26.8145	27.5125		1.07998	0.343067
0.0833753	0.816873	ZEU1	sp|Q0WW55|ZEUS1_ARATH Thymidylate kinase OS=Arabidopsis thaliana OX=3702 GN=ZEU1 PE=2 SV=1	24.485	24.2745	24.2782	24.2534	24.4947	24.8482	24.3061	24.8094		1.07896	-0.291816
0.083416	1.24515	CYTB5-D	sp|Q9ZWT2|CYB5D_ARATH Cytochrome B5 isoform D OS=Arabidopsis thaliana OX=3702 GN=CYTB5-D PE=1 SV=1	29.1293	28.8962	28.9113	29.216	28.6397	28.5823	28.557	29.1085		1.07875	0.316319
0.0839877	0.668001	CHL-CPN10	sp|O80504|CH102_ARATH 10 kDa chaperonin 2, chloroplastic OS=Arabidopsis thaliana OX=3702 GN=CPN10-2 PE=2 SV=1	25.9061	26.1302	26.0222	25.7712	26.3712	26.2538	27.3432	26.1898		1.07578	-0.582077
0.0840001	1.10041	CCT5	sp|O04450|TCPE_ARATH T-complex protein 1 subunit epsilon OS=Arabidopsis thaliana OX=3702 GN=CCT5 PE=1 SV=1	29.7791	29.7728	29.7551	29.8295	29.6155	29.6828	29.488	29.7981		1.07572	0.138037
0.0841265	0.837534	TIC110	sp|Q8LPR9|TI110_ARATH Protein TIC110, chloroplastic OS=Arabidopsis thaliana OX=3702 GN=TIC110 PE=1 SV=1	27.2255	27.2814	27.2229	27.1246	27.294	27.3493	27.8196	27.4145		1.07507	-0.255781
0.0844525	1.11754	CHC2	sp|Q0WLB5|CLAH2_ARATH Clathrin heavy chain 2 OS=Arabidopsis thaliana OX=3702 GN=CHC2 PE=1 SV=1	28.9738	28.9454	28.8959	28.946	28.8112	28.8415	28.5602	28.9069		1.07339	0.160327
0.0845455	0.890679	RPL14B	sp|Q9T043|RL142_ARATH 60S ribosomal protein L14-2 OS=Arabidopsis thaliana OX=3702 GN=RPL14B PE=1 SV=1	31.3686	31.2149	31.2159	31.5408	31.5431	31.4525	31.4725	31.5402		1.07291	-0.167023
0.0845864	0.89561		sp|Q8RYE9|GPPL3_ARATH Haloacid dehalogenase-like hydrolase domain-containing protein At2g33255 OS=Arabidopsis thaliana OX=3702 GN=At2g33255 PE=1 SV=1	25.3958	25.4566	25.4005	25.4672	25.6355	25.7805	25.4738	25.4665		1.0727	-0.159057
0.0848423	0.854641	At5g42390	sp|Q9FIH8|SPP_ARATH Stromal processing peptidase, chloroplastic OS=Arabidopsis thaliana OX=3702 GN=SPP PE=2 SV=1	25.6316	25.4459	25.3773	25.571	25.6403	25.755	25.9844	25.5526		1.07139	-0.22661
0.0849937	2.96734	MPK3	sp|Q39023|MPK3_ARATH Mitogen-activated protein kinase 3 OS=Arabidopsis thaliana OX=3702 GN=MPK3 PE=1 SV=2	25.3154	25.4947	25.0686	24.0149	22.7438	22.4162	23.0302	25.4267		1.07061	1.56917
0.0850311	1.23843	PUX8	sp|F4JPR7|PUX8_ARATH Plant UBX domain-containing protein 8 OS=Arabidopsis thaliana OX=3702 GN=PUX8 PE=1 SV=1	25.6096	25.9267	25.5627	25.9347	25.6351	25.2004	25.3229	25.6411		1.07042	0.308517
0.0851634	1.21019	GC1	sp|Q8S8N9|GOGC1_ARATH Golgin candidate 1 OS=Arabidopsis thaliana OX=3702 GN=GC1 PE=2 SV=2	25.082	24.963	24.8569	25.344	24.7595	24.573	24.968	24.8444		1.06975	0.275239
0.0854188	0.634571	T2H3.4	sp|O81417|SRPP_ARATH Protein SEED AND ROOT HAIR PROTECTIVE PROTEIN OS=Arabidopsis thaliana OX=3702 GN=SRPP PE=1 SV=1	26.4969	26.4371	26.1439	26.6048	27.0812	27.7621	26.2864	27.1777		1.06845	-0.656147
0.0857312	1.14289	FPS2	sp|Q43315|FPPS2_ARATH Farnesyl pyrophosphate synthase 2 OS=Arabidopsis thaliana OX=3702 GN=FPS2 PE=2 SV=1	27.2099	27.2859	27.2875	27.3999	27.1132	27.1949	26.8605	27.2439		1.06686	0.192685
0.0859767	1.20746	MED37C	sp|Q9LHA8|HS704_ARATH Heat shock 70 kDa protein 4 OS=Arabidopsis thaliana OX=3702 GN=HSP70-4 PE=1 SV=1	28.1538	28.1452	27.7629	27.9175	27.844	27.8043	27.4466	27.7967		1.06562	0.271974
0.0860258	1.28901	LAC10	sp|Q6ID18|LAC10_ARATH Laccase-10 OS=Arabidopsis thaliana OX=3702 GN=LAC10 PE=2 SV=1	31.6416	32.0591	31.5562	31.9505	31.6892	31.5293	31.4551	31.0687		1.06537	0.366263
0.086038	2.24769	CIPK26	sp|Q84VQ3|CIPKQ_ARATH CBL-interacting serine/threonine-protein kinase 26 OS=Arabidopsis thaliana OX=3702 GN=CIPK26 PE=1 SV=2	25.4826	25.4225	25.6716	25.2424	23.2751	23.9767	25.8973	23.9963		1.06531	1.16844
0.0860756	1.06558	VLN3	sp|O81645|VILI3_ARATH Villin-3 OS=Arabidopsis thaliana OX=3702 GN=VLN3 PE=1 SV=2	27.2648	27.2372	27.1822	27.1823	27.2018	27.1602	27.0169	27.121		1.06512	0.0916405
0.0861131	0.861068	RZ1A	sp|Q9LIN3|RZ1A_ARATH Glycine-rich RNA-binding protein RZ1A OS=Arabidopsis thaliana OX=3702 GN=RZ1A PE=1 SV=1	25.8815	25.7227	25.7876	26.0023	26.0432	26.1797	25.8297	26.2048		1.06493	-0.215801
0.086343	0.753197	At3g23750	sp|Q9LK43|TMK4_ARATH Receptor-like kinase TMK4 OS=Arabidopsis thaliana OX=3702 GN=TMK4 PE=1 SV=1	25.6694	25.6281	25.1377	25.6838	25.8418	26.1528	25.5567	26.2034		1.06377	-0.4089
0.0863446	0.775399	FLA1	sp|Q9FM65|FLA1_ARATH Fasciclin-like arabinogalactan protein 1 OS=Arabidopsis thaliana OX=3702 GN=FLA1 PE=1 SV=1	27.2957	27.3097	26.8897	27.6373	27.5007	27.6536	27.5349	27.9113		1.06376	-0.366989
0.086585	0.900003	VHA-d2	sp|Q9LHA4|VA0D2_ARATH V-type proton ATPase subunit d2 OS=Arabidopsis thaliana OX=3702 GN=VHA-d2 PE=2 SV=1	29.0767	29.1775	29.146	29.0889	29.4281	29.3423	29.1066	29.2201		1.06256	-0.151999
0.0866745	3.27227	CID6	sp|Q6NQH9|CID6_ARATH Polyadenylate-binding protein-interacting protein 6 OS=Arabidopsis thaliana OX=3702 GN=CID6 PE=2 SV=1	26.909	26.8723	26.8643	26.756	26.5739	26.5959	23.5984	23.7922		1.06211	1.71029
0.0867152	0.875843		sp|Q944L7|SLP2_ARATH Shewanella-like protein phosphatase 2 OS=Arabidopsis thaliana OX=3702 GN=SLP2 PE=1 SV=1	25.1	24.9298	24.9344	24.8483	25.3641	25.1147	25.0951	25.0036		1.0619	-0.191256
0.086885	0.908138	PUR5	sp|Q05728|PUR5_ARATH Phosphoribosylformylglycinamidine cyclo-ligase, chloroplastic OS=Arabidopsis thaliana OX=3702 GN=PUR5 PE=1 SV=2	28.2527	28.3436	28.2062	28.2626	28.3046	28.4847	28.2955	28.5365		1.06106	-0.139017
0.0869905	0.885398	HSK	sp|Q8L7R2|KHSE_ARATH Homoserine kinase OS=Arabidopsis thaliana OX=3702 GN=HSK PE=1 SV=1	27.6448	27.8223	27.6439	27.6232	27.6638	27.8696	27.8913	28.0119		1.06053	-0.175602
0.0870233	1.11619	GAMMA-ADR	sp|Q84K16|AP1G1_ARATH AP-1 complex subunit gamma-1 OS=Arabidopsis thaliana OX=3702 GN=GAMMA-ADR PE=1 SV=1	27.6333	27.7566	27.8262	27.6598	27.6617	27.5413	27.388	27.6506		1.06036	0.158576
0.0870497	0.905639	MCM2	sp|Q9LPD9|MCM2_ARATH DNA replication licensing factor MCM2 OS=Arabidopsis thaliana OX=3702 GN=MCM2 PE=1 SV=1	25.1732	25.2458	24.9743	25.2137	25.2422	25.2622	25.2794	25.3952		1.06023	-0.142992
0.087124	1.16834	PER22	sp|P24102|PER22_ARATH Peroxidase 22 OS=Arabidopsis thaliana OX=3702 GN=PER22 PE=1 SV=2	32.5808	32.6245	32.4382	32.7093	32.3616	32.4933	32.0982	32.5019		1.05986	0.224463
0.0871501	0.51646	CPP1	sp|Q9FN50|CPP1_ARATH Protein CHAPERONE-LIKE PROTEIN OF POR1, chloroplastic OS=Arabidopsis thaliana OX=3702 GN=CPP1 PE=1 SV=1	23.3558	24.8882	24.2526	23.4126	24.9219	24.9662	25.6248	24.2094		1.05973	-0.953271
0.0872714	1.15986		sp|Q8H118|PMT1_ARATH Probable methyltransferase PMT1 OS=Arabidopsis thaliana OX=3702 GN=At3g23300 PE=2 SV=2	27.1856	27.1565	26.9727	27.2	26.8933	26.8435	26.7507	27.1715		1.05913	0.213945
0.0876509	0.891348	RPS9B	sp|Q9LXG1|RS91_ARATH 40S ribosomal protein S9-1 OS=Arabidopsis thaliana OX=3702 GN=RPS9B PE=1 SV=1	31.2862	31.2185	31.0134	31.361	31.4282	31.3716	31.3002	31.4428		1.05724	-0.165939
0.0876763	0.923608	MEBL	sp|Q8LPT3|MEBL_ARATH Membrane protein of ER body-like protein OS=Arabidopsis thaliana OX=3702 GN=MEBL PE=2 SV=1	24.5173	24.5434	24.3591	24.5063	24.527	24.5591	24.7015	24.5971		1.05712	-0.114647
0.0878059	1.17467		sp|O82238|NDS5A_ARATH NADH dehydrogenase [ubiquinone] iron-sulfur protein 5-A OS=Arabidopsis thaliana OX=3702 GN=At2g47690;sp|Q9LZI6|NDS5B_ARATH NADH dehydrogenase [ubiquinone] iron-sulfur protein 5-B OS=Arabidopsis thaliana OX=3702 GN=At3g62790 PE=3 SV=1	27.529	27.7366	27.7691	27.6383	27.6775	27.1895	27.4088	27.468		1.05648	0.232253
0.0880536	1.22602	F9P14.7	sp|Q9LNC6|TOL2_ARATH TOM1-like protein 2 OS=Arabidopsis thaliana OX=3702 GN=TOL2 PE=1 SV=1	26.3836	26.299	26.3812	26.6625	26.0815	26.0194	25.9579	26.4916		1.05525	0.293988
0.088299	0.858143	SE	sp|Q9ZVD0|SRRT_ARATH Serrate RNA effector molecule OS=Arabidopsis thaliana OX=3702 GN=SE PE=1 SV=2	28.548	28.3373	28.6463	28.7607	28.9637	28.6728	28.768	28.7706		1.05404	-0.220711
0.0883574	1.12656	LACS9	sp|Q9CAP8|LACS9_ARATH Long chain acyl-CoA synthetase 9, chloroplastic OS=Arabidopsis thaliana OX=3702 GN=LACS9 PE=1 SV=1	27.0116	27.0727	26.7976	26.9639	26.8597	26.7733	26.6256	26.8994		1.05376	0.171927
0.0883821	0.781612	U2AF65A	sp|O23212|U2A2A_ARATH Splicing factor U2af large subunit A OS=Arabidopsis thaliana OX=3702 GN=U2AF65A PE=1 SV=2	25.9644	25.9997	25.9004	25.7065	26.2502	26.4018	25.7962	26.5447		1.05364	-0.355475
0.0886212	0.749839	At4g08160	sp|F4JG10|XYN3_ARATH Endo-1,4-beta-xylanase 3 OS=Arabidopsis thaliana OX=3702 GN=XYN3 PE=2 SV=1	24.4338	24.2831	24.1707	24.8959	24.6249	24.9235	25.1957	24.7009		1.05246	-0.415348
0.0889233	1.10991	PP2AA2	sp|Q38950|2AAB_ARATH Serine/threonine-protein phosphatase 2A 65 kDa regulatory subunit A beta isoform OS=Arabidopsis thaliana OX=3702 GN=PP2AA2 PE=1 SV=2	27.8285	27.9401	27.7829	27.744	27.721	27.7849	27.5014	27.6863		1.05098	0.150444
0.0889525	30.288	At5g03690	sp|F4KGQ0|ALFC4_ARATH Fructose-bisphosphate aldolase 4, cytosolic OS=Arabidopsis thaliana OX=3702 GN=FBA4 PE=1 SV=1	32.2052	33.2268	32.3356	32.3126	33.4059	23.6989	23.5439	29.7487		1.05084	4.92067
0.0890088	1.12707	PFK5	sp|Q8VYN6|PFKA5_ARATH ATP-dependent 6-phosphofructokinase 5, chloroplastic OS=Arabidopsis thaliana OX=3702 GN=PFK5 PE=1 SV=1	28.5928	28.4803	28.6271	28.3371	28.4591	28.3628	28.3295	28.1956		1.05057	0.172573
0.0890098	0.76654	At2g22170	sp|Q9SIE7|PLAT2_ARATH PLAT domain-containing protein 2 OS=Arabidopsis thaliana OX=3702 GN=PLAT2 PE=2 SV=1	30.6576	30.5596	30.2592	30.9788	30.9741	31.0936	30.684	31.2378		1.05056	-0.383567
0.0890168	0.739918	RABE1A	sp|O24466|RAE1A_ARATH Ras-related protein RABE1a OS=Arabidopsis thaliana OX=3702 GN=RABE1A PE=1 SV=1	25.434	25.173	25.8217	25.6628	25.8046	25.7628	26.4399	25.8225		1.05053	-0.434562
0.0892003	1.4909	CYP71B7	sp|Q96514|C71B7_ARATH Cytochrome P450 71B7 OS=Arabidopsis thaliana OX=3702 GN=CYP71B7 PE=1 SV=1	26.9484	27.4062	27.1188	26.2356	26.4975	26.537	26.4244	25.9454		1.04963	0.57618
0.0894157	1.17301	MIP2	sp|Q9FIN7|MIP2_ARATH MAG2-interacting protein 2 OS=Arabidopsis thaliana OX=3702 GN=MIP2 PE=1 SV=1	25.4452	25.2572	25.0988	25.3784	25.1485	25.2612	24.9457	24.9033		1.04859	0.230215
0.0894267	0.630148	MORF1	sp|O49429|MORF1_ARATH Multiple organellar RNA editing factor 1, mitochondrial OS=Arabidopsis thaliana OX=3702 GN=MORF1 PE=1 SV=1	24.8518	24.5004	24.1817	23.6262	24.9634	25.1288	25.3366	24.3961		1.04853	-0.666237
0.0896846	0.800093		sp|C0LGH3|Y5614_ARATH Probable LRR receptor-like serine/threonine-protein kinase At1g56140 OS=Arabidopsis thaliana OX=3702 GN=At1g56140 PE=2 SV=2	25.2919	25.0621	25.5001	24.7925	25.5382	25.5855	25.3895	25.4205		1.04728	-0.32176
0.0897337	1.26482	GSTU7	sp|Q9ZW24|GSTU7_ARATH Glutathione S-transferase U7 OS=Arabidopsis thaliana OX=3702 GN=GSTU7 PE=2 SV=1	28.9414	29.092	29.1739	28.4746	28.6306	28.7042	28.5744	28.4171		1.04704	0.338933
0.0898977	1.11868	CAND1	sp|Q8L5Y6|CAND1_ARATH Cullin-associated NEDD8-dissociated protein 1 OS=Arabidopsis thaliana OX=3702 GN=CAND1 PE=1 SV=1	28.0088	28.0907	28.0254	27.9028	27.8806	27.938	27.6384	27.9234		1.04625	0.161791
0.0902799	1.17614	CDKA-1	sp|P24100|CDKA1_ARATH Cyclin-dependent kinase A-1 OS=Arabidopsis thaliana OX=3702 GN=CDKA-1 PE=1 SV=1	27.2633	27.2777	27.0311	27.2885	26.9684	27.1025	26.7085	27.145		1.04441	0.234057
0.0903253	0.850464	FTSZ2-1	sp|O82533|FTZ21_ARATH Cell division protein FtsZ homolog 2-1, chloroplastic OS=Arabidopsis thaliana OX=3702 GN=FTSZ2-1 PE=1 SV=2	26.046	26.3164	26.0458	26.0759	26.2266	26.3905	26.6102	26.1914		1.04419	-0.233677
0.0904245	1.13305	MPA1	sp|Q8H0S9|PSA_ARATH Puromycin-sensitive aminopeptidase OS=Arabidopsis thaliana OX=3702 GN=MPA1 PE=2 SV=1	29.3642	29.4504	29.5937	29.2031	29.2068	29.2777	29.2798	29.1263		1.04371	0.180207
0.0907155	1.1017	TOM2AH1	sp|Q9SVU4|TET20_ARATH Tetraspanin-20 OS=Arabidopsis thaliana OX=3702 GN=TOM2AH1 PE=1 SV=1	25.8493	25.6813	25.9072	25.6889	25.7086	25.5596	25.7108	25.5889		1.04232	0.139736
0.0909257	1.15722		sp|Q9XGZ9|P2C72_ARATH Probable protein phosphatase 2C 72 OS=Arabidopsis thaliana OX=3702 GN=At5g26010 PE=2 SV=2	25.0122	25.168	25.4375	25.056	25.0434	24.9563	24.8407	24.9907		1.04131	0.210661
0.0917622	1.13403	RABA2C	sp|Q96283|RAA2C_ARATH Ras-related protein RABA2c OS=Arabidopsis thaliana OX=3702 GN=RABA2C PE=2 SV=4	28.8251	28.6541	28.6977	28.8258	28.5243	28.5658	28.404	28.7828		1.03734	0.181456
0.0917782	1.15512	HOP1	sp|Q9LNB6|HSOP1_ARATH Hsp70-Hsp90 organizing protein 1 OS=Arabidopsis thaliana OX=3702 GN=HOP1 PE=2 SV=1	27.8032	27.6589	27.6505	27.7719	27.5468	27.4111	27.3268	27.7676		1.03726	0.208044
0.091846	0.70956		sp|Q9C578|RCL1_ARATH Probable RNA 3-terminal phosphate cyclase-like protein OS=Arabidopsis thaliana OX=3702 GN=At5g22100 PE=2 SV=1	24.6815	24.4035	23.7268	24.3245	24.9981	24.3981	24.7168	25.0033		1.03694	-0.495003
0.091885	1.13165	CAD4	sp|P48523|CADH4_ARATH Cinnamyl alcohol dehydrogenase 4 OS=Arabidopsis thaliana OX=3702 GN=CAD4 PE=1 SV=1	30.2466	30.1599	30.2815	30.4788	30.0966	30.075	30.0041	30.2774		1.03676	0.178426
0.0924799	0.838385	At2g34260	sp|O80775|WDR55_ARATH WD repeat-containing protein 55 OS=Arabidopsis thaliana OX=3702 GN=WDR55 PE=1 SV=2	24.7131	24.957	25.1495	25.0307	25.1157	25.2405	25.0576	25.4538		1.03395	-0.254315
0.0925412	1.28641	DHAR1	sp|Q9FWR4|DHAR1_ARATH Glutathione S-transferase DHAR1, mitochondrial OS=Arabidopsis thaliana OX=3702 GN=DHAR1 PE=1 SV=1	31.0042	31.0113	30.6374	30.7842	30.4944	30.2483	30.9407	30.3002		1.03367	0.363351
0.0927886	1.17993	MSRB5	sp|Q9ZS91|MSRB5_ARATH Peptide methionine sulfoxide reductase B5 OS=Arabidopsis thaliana OX=3702 GN=MSRB5 PE=1 SV=1	28.9748	28.8696	28.8544	28.9791	28.8417	28.5459	28.4294	28.9062		1.03251	0.238703
0.092975	0.829891	RH5	sp|Q9C551|RH5_ARATH DEAD-box ATP-dependent RNA helicase 5 OS=Arabidopsis thaliana OX=3702 GN=RH5 PE=1 SV=1	25.8062	25.6001	25.3772	25.5949	26.0132	25.9899	25.5682	25.8832		1.03163	-0.269006
0.0931282	0.831622	ABCI7	sp|Q9LQK7|AB7I_ARATH Protein ABCI7, chloroplastic OS=Arabidopsis thaliana OX=3702 GN=ABCI7 PE=1 SV=1	25.8856	25.7951	25.7809	25.7459	26.0102	26.0012	26.4361	25.8241		1.03092	-0.266001
0.0937969	0.820982		sp|P46086|KIME_ARATH Mevalonate kinase OS=Arabidopsis thaliana OX=3702 GN=At5g27450 PE=2 SV=1	25.9899	25.9289	25.8375	26.0086	26.0952	26.3757	26.5228	25.9095		1.02781	-0.284577
0.0938054	1.12281	PP2AA3	sp|Q38951|2AAG_ARATH Serine/threonine-protein phosphatase 2A 65 kDa regulatory subunit A gamma isoform OS=Arabidopsis thaliana OX=3702 GN=PP2AA3 PE=1 SV=2	28.0538	28.0865	28.0236	28.075	27.9277	28.0038	27.649	27.9899		1.02777	0.167117
0.0939195	1.14686	ALDH3H1	sp|Q70DU8|AL3H1_ARATH Aldehyde dehydrogenase family 3 member H1 OS=Arabidopsis thaliana OX=3702 GN=ALDH3H1 PE=1 SV=2	28.3008	28.3958	28.2148	28.1044	28.1815	28.1616	27.8434	28.0384		1.02724	0.197692
0.09421	1.15136		sp|Q9S7M9|P24B2_ARATH Transmembrane emp24 domain-containing protein p24beta2 OS=Arabidopsis thaliana OX=3702 GN=At3g07680 PE=1 SV=1	27.1189	27.0378	27.2532	27.146	27.1415	26.8351	26.7347	27.0313		1.0259	0.203343
0.0947198	1.12804	PBG1	sp|Q7DLR9|PSB4_ARATH Proteasome subunit beta type-4 OS=Arabidopsis thaliana OX=3702 GN=PBG1 PE=1 SV=2	29.7177	29.7807	29.7849	29.7027	29.5916	29.661	29.3281	29.7101		1.02356	0.173812
0.0948798	0.785008	At4g18465	sp|F4JRJ6|DEAH9_ARATH Probable pre-mRNA-splicing factor ATP-dependent RNA helicase DEAH9 OS=Arabidopsis thaliana OX=3702 GN=At4g18465 PE=3 SV=1	27.9271	28.4361	27.6659	27.9736	28.281	28.5597	28.2229	28.336		1.02283	-0.349221
0.0948909	1.13217	PEX14	sp|Q9FXT6|PEX14_ARATH Peroxisomal membrane protein PEX14 OS=Arabidopsis thaliana OX=3702 GN=PEX14 PE=1 SV=2	25.8283	25.6168	25.8683	25.83	25.7373	25.453	25.7132	25.5235		1.02278	0.179092
0.0950907	1.26658	HNL	sp|Q9LFT6|HNL_ARATH Alpha-hydroxynitrile lyase OS=Arabidopsis thaliana OX=3702 GN=HNL PE=1 SV=1	26.2305	26.6244	26.2561	26.6958	26.396	26.0247	25.823	26.1993		1.02186	0.340938
0.0954755	1.39177	CYP72A14	sp|Q9LUC6|C7A14_ARATH Cytochrome P450 72A14 OS=Arabidopsis thaliana OX=3702 GN=CYP72A14 PE=2 SV=1	27.2362	27.4134	27.4622	26.7157	27.1278	26.8894	26.5208	26.3818		1.02011	0.476921
0.0955492	1.18494	ACA2	sp|O81108|ACA2_ARATH Calcium-transporting ATPase 2, plasma membrane-type OS=Arabidopsis thaliana OX=3702 GN=ACA2 PE=1 SV=1	26.4156	26.4089	26.2812	26.4413	25.9589	26.4028	25.9239	26.2822		1.01977	0.244808
0.0960223	1.1092	GRF9	sp|Q96299|14339_ARATH 14-3-3-like protein GF14 mu OS=Arabidopsis thaliana OX=3702 GN=GRF9 PE=1 SV=2	29.1712	29.2141	29.2247	29.0747	29.103	29.1106	29.0503	28.8227		1.01763	0.149521
0.0961452	1.1297	CLPR4	sp|Q8LB10|CLPR4_ARATH ATP-dependent Clp protease proteolytic subunit-related protein 4, chloroplastic OS=Arabidopsis thaliana OX=3702 GN=CLPR4 PE=1 SV=1	26.6698	26.5594	26.5057	26.5521	26.2866	26.3802	26.633	26.2834		1.01707	0.175944
0.0961694	1.23671		sp|Q9SK86|ADHL1_ARATH Alcohol dehydrogenase-like 1 OS=Arabidopsis thaliana OX=3702 GN=At1g22430 PE=2 SV=1	26.6108	27.0659	27.0432	26.5346	26.5003	26.3212	26.6313	26.5757		1.01696	0.306504
0.096302	1.13979	BCA4	sp|Q94CE4|BCA4_ARATH Beta carbonic anhydrase 4 OS=Arabidopsis thaliana OX=3702 GN=BCA4 PE=1 SV=1	29.5797	29.7014	29.7798	29.683	29.5531	29.5167	29.6638	29.2552		1.01636	0.188772
0.0963113	0.889323	RPL18C	sp|Q940B0|RL183_ARATH 60S ribosomal protein L18-3 OS=Arabidopsis thaliana OX=3702 GN=RPL18C PE=2 SV=1	31.9132	31.8768	31.845	32.197	32.1152	32.0888	32.0927	32.2122		1.01632	-0.169221
0.0964599	1.55955	UGT84A4	sp|O23402|U84A4_ARATH UDP-glycosyltransferase 84A4 OS=Arabidopsis thaliana OX=3702 GN=UGT84A4 PE=1 SV=1	24.4427	25.6139	24.9407	24.5826	24.2898	23.7264	24.6588	24.3402		1.01565	0.64113
0.0965044	0.938311	At1g79090	sp|Q0WPK4|PAT1H_ARATH Protein PAT1 homolog OS=Arabidopsis thaliana OX=3702 GN=PAT1 PE=1 SV=1	25.7987	25.9499	25.9607	25.8809	25.9328	26.06	25.9592	26.0057		1.01545	-0.0918622
0.0965218	0.502582	H2AV	sp|O23628|H2AV1_ARATH Histone H2A variant 1 OS=Arabidopsis thaliana OX=3702 GN=H2AV PE=1 SV=1;sp|Q9SII0|H2AV2_ARATH Probable histone H2A variant 2 OS=Arabidopsis thaliana OX=3702 GN=At2g38810 PE=2 SV=1;sp|Q9T0H7|H2A8_ARATH Histone H2A.8 OS=Arabidopsis thal	24.0507	22.7078	23.7204	24.8374	25.3212	24.564	24.2705	25.1308		1.01537	-0.992568
0.096569	0.868447	PBB1	sp|O23710|PSB7A_ARATH Proteasome subunit beta type-7-A OS=Arabidopsis thaliana OX=3702 GN=PBB1 PE=1 SV=2	28.5975	28.3224	28.6923	28.4645	28.7599	28.6316	28.8898	28.6095		1.01516	-0.203491
0.0967734	0.778316	FLA7	sp|Q9SJ81|FLA7_ARATH Fasciclin-like arabinogalactan protein 7 OS=Arabidopsis thaliana OX=3702 GN=FLA7 PE=2 SV=1	28.7939	28.8251	28.5601	29.2318	29.1993	29.2018	28.9355	29.5207		1.01424	-0.361573
0.0970397	0.731116		sp|Q9FMD7|Y5659_ARATH Probable inactive receptor kinase At5g16590 OS=Arabidopsis thaliana OX=3702 GN=At5g16590 PE=1 SV=1	26.4233	26.4137	25.859	26.7869	26.9014	26.7723	26.5036	27.113		1.01305	-0.451828
0.0970688	1.16417		sp|Q9SI20|EF1D2_ARATH Elongation factor 1-delta 2 OS=Arabidopsis thaliana OX=3702 GN=At2g18110 PE=1 SV=1	28.0082	28.1484	27.9008	28.07	27.7919	27.8581	27.5614	28.0388		1.01292	0.219301
0.0970972	1.17134	NQR	sp|Q9LK88|NQR_ARATH NADPH:quinone oxidoreductase OS=Arabidopsis thaliana OX=3702 GN=NQR PE=1 SV=1	29.4146	29.7407	29.6173	29.4182	29.2492	29.5457	29.3342	29.1493		1.01279	0.228162
0.0972958	0.918414	AR192	sp|Q8LB47|MGE2_ARATH GrpE protein homolog 2, mitochondrial OS=Arabidopsis thaliana OX=3702 GN=Mge2 PE=1 SV=1	27.1387	26.9721	27.1208	27.1748	27.3327	27.2208	27.1179	27.2261		1.01191	-0.122783
0.0974169	0.91936	RIDA	sp|Q94JQ4|RIDA_ARATH Reactive Intermediate Deaminase A, chloroplastic OS=Arabidopsis thaliana OX=3702 GN=RIDA PE=1 SV=1	29.9679	29.9138	29.8567	29.9929	30.1391	30.1215	29.9021	30.0539		1.01137	-0.121299
0.0975388	0.782807	RH51	sp|Q9LIH9|RH51_ARATH DEAD-box ATP-dependent RNA helicase 51 OS=Arabidopsis thaliana OX=3702 GN=RH51 PE=2 SV=1	25.4726	25.3505	25.2286	25.8743	25.6564	25.689	25.8415	26.1521		1.01082	-0.353271
0.0976504	0.917622	PDH-E1 ALPHA	sp|O24457|ODPA3_ARATH Pyruvate dehydrogenase E1 component subunit alpha-3, chloroplastic OS=Arabidopsis thaliana OX=3702 GN=PDH-E1 ALPHA PE=2 SV=1	28.676	28.6973	28.6392	28.8279	28.8366	28.7542	28.7769	28.9688		1.01033	-0.124028
0.0977619	0.912145		sp|Q94AD1|D1861_ARATH Putative DNA-binding protein At1g48610 OS=Arabidopsis thaliana OX=3702 GN=At1g48610 PE=1 SV=1	28.6934	28.7234	28.7209	28.7788	28.9795	28.6836	28.9351	28.8489		1.00983	-0.132666
0.0977666	0.427365	CHLI1	sp|P16127|CHLI1_ARATH Magnesium-chelatase subunit ChlI-1, chloroplastic OS=Arabidopsis thaliana OX=3702 GN=CHLI1 PE=1 SV=1	25.8386	26.492	25.7412	25.8757	26.7428	26.7323	29.0017	26.3765		1.00981	-1.22646
0.0984159	0.25716		sp|Q9SB42|STKLS_ARATH GLABROUS1 enhancer-binding protein-like OS=Arabidopsis thaliana OX=3702 GN=GEBPL PE=1 SV=1	27.0097	23.3353	26.8881	23.6645	27.3856	26.9458	27.2256	27.1776		1.00693	-1.95926
0.0984472	1.08799		sp|Q885J7|ASTD_PSESM N-succinylglutamate 5-semialdehyde dehydrogenase OS=Pseudomonas syringae pv. tomato (strain ATCC BAA-871 / DC3000) OX=223283 GN=astD PE=3 SV=1	27.5449	27.5592	27.5181	27.3864	27.3284	27.5024	27.4078	27.2833		1.0068	0.121659
0.0986168	1.10036	PPC1	sp|Q9MAH0|CAPP1_ARATH Phosphoenolpyruvate carboxylase 1 OS=Arabidopsis thaliana OX=3702 GN=PPC1 PE=1 SV=1	30.0821	30.1467	30.0146	30.0979	29.809	29.9225	29.9344	30.1235		1.00605	0.137975
0.098727	1.2053	ASP2	sp|P46645|AAT2_ARATH Aspartate aminotransferase, cytoplasmic isozyme 1 OS=Arabidopsis thaliana OX=3702 GN=ASP2 PE=1 SV=2	30.69	30.7556	30.901	30.307	30.4944	30.3881	30.4498	30.2438		1.00556	0.269394
0.0990571	1.22716		sp|Q8L7V3|PMTQ_ARATH Probable methyltransferase PMT26 OS=Arabidopsis thaliana OX=3702 GN=At5g64030 PE=2 SV=1	27.1437	27.1927	26.8334	26.9469	26.6461	26.5951	26.5848	27.1095		1.00411	0.295325
0.09921	1.18173	AXR4	sp|Q9FZ33|AXR4_ARATH Protein AUXIN RESPONSE 4 OS=Arabidopsis thaliana OX=3702 GN=AXR4 PE=1 SV=1	26.6264	26.6865	26.7275	26.7506	26.4493	26.5069	26.1432	26.7281		1.00344	0.240906
0.0992892	1.27322	NIT2	sp|P32962|NRL2_ARATH Nitrilase 2 OS=Arabidopsis thaliana OX=3702 GN=NIT2 PE=1 SV=1	30.5627	30.7192	30.9141	30.2079	30.4186	30.2584	30.3581	29.9747		1.0031	0.348484
0.099439	0.863444		sp|Q93XX8|NOP10_ARATH H/ACA ribonucleoprotein complex subunit 3-like protein OS=Arabidopsis thaliana OX=3702 GN=At2g20490 PE=3 SV=2	27.6483	27.7305	27.6075	27.5827	28.053	27.8819	27.5627	27.9187		1.00244	-0.211826
0.09954	0.934896	SIR	sp|Q9LZ66|SIR_ARATH Assimilatory sulfite reductase (ferredoxin), chloroplastic OS=Arabidopsis thaliana OX=3702 GN=SIR PE=1 SV=1	30.4568	30.4394	30.4439	30.2888	30.5322	30.5643	30.4231	30.4977		1.002	-0.0971227
0.100124	0.902478		sp|Q9LEY9|NHP2_ARATH H/ACA ribonucleoprotein complex subunit 2-like protein OS=Arabidopsis thaliana OX=3702 GN=At5g08180 PE=1 SV=1	28.0869	28.1478	28.06	28.0991	28.3648	28.0308	28.2808	28.3096		0.99946	-0.148037
0.100204	0.857324	OVA5	sp|Q9LJE2|SYKM_ARATH Lysine--tRNA ligase, chloroplastic/mitochondrial OS=Arabidopsis thaliana OX=3702 GN=OVA5 PE=2 SV=1	24.4739	24.6202	24.564	24.2507	24.5035	24.7522	24.6559	24.8855		0.999114	-0.222088
0.100258	1.09335	CYC11	sp|Q9LK29|CYC1A_ARATH Cytochrome c1 1, heme protein, mitochondrial OS=Arabidopsis thaliana OX=3702 GN=CYC1-1 PE=1 SV=1	30.2821	30.2724	30.305	30.1801	30.2703	30.0795	29.9928	30.1819		0.998881	0.12876
0.100525	0.69119	FLA9	sp|Q9ZWA8|FLA9_ARATH Fasciclin-like arabinogalactan protein 9 OS=Arabidopsis thaliana OX=3702 GN=FLA9 PE=2 SV=1	27.73	27.6859	27.3373	28.3545	28.3493	28.1718	27.9448	28.7731		0.997727	-0.532845
0.100589	0.865311	RPP1B	sp|O23095|RLA12_ARATH 60S acidic ribosomal protein P1-2 OS=Arabidopsis thaliana OX=3702 GN=RPP1B PE=1 SV=2	28.0253	27.8009	27.9645	28.2266	28.1238	28.0955	28.3554	28.2775		0.997448	-0.208709
0.100742	1.13975	CYTB5-C	sp|Q9ZNV4|CYB5C_ARATH Cytochrome B5 isoform C OS=Arabidopsis thaliana OX=3702 GN=CYTB5-C PE=1 SV=1	27.8506	27.6467	27.4605	27.5985	27.4373	27.3943	27.3629	27.607		0.996789	0.188715
0.100759	1.11907	ADK2	sp|Q9LZG0|ADK2_ARATH Adenosine kinase 2 OS=Arabidopsis thaliana OX=3702 GN=ADK2 PE=1 SV=1	29.2266	29.2643	29.1451	29.33	28.9031	29.0803	29.0666	29.2668		0.996715	0.162306
0.1008	0.543983	RH35	sp|Q9LU46|RH35_ARATH DEAD-box ATP-dependent RNA helicase 35 OS=Arabidopsis thaliana OX=3702 GN=RH35 PE=2 SV=1	24.432	23.2308	25.0797	25.023	25.7479	25.1767	25.1042	25.2501		0.996539	-0.878366
0.100801	0.114231	VHA-c5;VHA-c3;VHA-c1;VHA-c2;VHA-c4	sp|P0DH92|VATL1_ARATH V-type proton ATPase s;sp|P0DH93|VATL3_ARATH V-type proton ATPase subunit c3 OS=Arabidopsis thaliana OX=3702 GN=VHA-c3 PE=1 SV=1;sp|P0DH94|VATL5_ARATH V-type proton ATPase subunit c5 OS=Arabidopsis thaliana OX=3702 GN=VHA-c5 PE=2 SV=1	23.8567	24.1028	24.6909	26.4665	29.8909	26.7858	30.7662	24.1938		0.996537	-3.12997
0.100867	0.918206	DHQS	sp|Q8VYV7|DHQS_ARATH 3-dehydroquinate synthase, chloroplastic OS=Arabidopsis thaliana OX=3702 GN=DHQS PE=1 SV=1	28.0146	28.023	28.1909	27.9383	28.1704	28.2597	28.1012	28.1279		0.996251	-0.12311
0.100945	1.06693	RPT3	sp|Q9SEI4|PRS6B_ARATH 26S proteasome regulatory subunit 6B homolog OS=Arabidopsis thaliana OX=3702 GN=RPT3 PE=1 SV=1	29.2158	29.0659	29.1884	29.1477	29.1314	29.0309	28.9757	29.1059		0.995916	0.0934682
0.101289	0.948044		sp|O82662|SUCB_ARATH Succinate--CoA ligase [ADP-forming] subunit beta, mitochondrial OS=Arabidopsis thaliana OX=3702 GN=At2g20420 PE=1 SV=1	30.306	30.317	30.4106	30.2405	30.4211	30.4185	30.402	30.3403		0.99444	-0.0769734
0.101386	1.07686	ALDH5F1	sp|Q9SAK4|SSDH_ARATH Succinate-semialdehyde dehydrogenase, mitochondrial OS=Arabidopsis thaliana OX=3702 GN=ALDH5F1 PE=1 SV=2	28.1446	28.2256	28.2237	28.1112	28.1652	28.1262	28.0299	27.9564		0.994021	0.106835
0.101423	0.668442	CPN60B1	sp|P21240|CPNB1_ARATH Chaperonin 60 subunit beta 1, chloroplastic OS=Arabidopsis thaliana OX=3702 GN=CPN60B1 PE=1 SV=3	28.8244	28.6523	28.4516	28.8407	28.8374	28.9388	30.0984	29.2188		0.993864	-0.581126
0.101685	1.10422	MAG5	sp|Q9FGK9|MAG5_ARATH Protein transport protein SEC16A homolog OS=Arabidopsis thaliana OX=3702 GN=MAG5 PE=1 SV=1	24.9142	25.0919	25.1307	25.0532	24.9872	24.9812	24.742	24.9075		0.992745	0.143024
0.101766	0.629657	PER7	sp|Q9SY33|PER7_ARATH Peroxidase 7 OS=Arabidopsis thaliana OX=3702 GN=PER7 PE=2 SV=1	26.9775	26.5496	26.5262	27.5775	27.159	28.1504	27.1873	27.8035		0.992395	-0.667361
0.102106	0.861289	AVP1	sp|P31414|AVP1_ARATH Pyrophosphate-energized vacuolar membrane proton pump 1 OS=Arabidopsis thaliana OX=3702 GN=AVP1 PE=1 SV=1	29.8357	29.8158	29.6357	30.0927	29.9874	29.9817	30.0346	30.2379		0.99095	-0.215431
0.102321	0.514015	PEX4	sp|Q8LGF7|PEX4_ARATH Protein PEROXIN-4 OS=Arabidopsis thaliana OX=3702 GN=PEX4 PE=1 SV=1	26.3703	24.1856	25.8622	24.795	26.2728	26.2426	26.1666	26.3715		0.990035	-0.960119
0.102372	1.13305	APUM5	sp|Q9LJX4|PUM5_ARATH Pumilio homolog 5 OS=Arabidopsis thaliana OX=3702 GN=APUM5 PE=1 SV=2	25.8228	25.931	26.1545	25.9049	25.9207	25.8258	25.6774	25.6684		0.98982	0.180207
0.102497	0.923995	RPL13B	sp|P41127|RL131_ARATH 60S ribosomal protein L13-1 OS=Arabidopsis thaliana OX=3702 GN=RPL13B PE=1 SV=1	31.7058	31.7342	31.6145	31.7521	31.8282	31.6862	31.9338	31.8146		0.989287	-0.114044
0.102978	0.443948	PAP10	sp|Q9SIV9|PPA10_ARATH Purple acid phosphatase 10 OS=Arabidopsis thaliana OX=3702 GN=PAP10 PE=2 SV=1	24.1532	22.9359	25.5587	25.2762	25.5035	25.5111	26.0047	25.5907		0.987254	-1.17154
0.103499	1.1126	MVD1	sp|O23722|MVD1_ARATH Diphosphomevalonate decarboxylase MVD1, peroxisomal OS=Arabidopsis thaliana OX=3702 GN=MVD1 PE=1 SV=1	29.4438	29.4328	29.3495	29.5652	29.2712	29.2927	29.1434	29.4683		0.985065	0.153931
0.103509	0.721516	SSRP1	sp|Q05153|SSRP1_ARATH FACT complex subunit SSRP1 OS=Arabidopsis thaliana OX=3702 GN=SSRP1 PE=1 SV=2	25.9605	25.9013	25.1313	25.9574	25.851	26.322	26.5041	26.1569		0.98502	-0.470896
0.103776	1.19476	GPAT4;GPAT8	sp|Q5XF03|GPAT8_ARATH Probable glycerol-3-phosphate acyltransferase 8 OS=Arabidopsis thaliana OX=3702 GN=GPAT8 PE=2 SV=1;sp|Q9LMM0|GPAT4_ARATH Glycerol-3-phosphate 2-O-acyltransferase 4 OS=Arabidopsis thaliana OX=3702 GN=GPAT4 PE=1 SV=1	25.3293	25.451	25.4297	25.2266	24.9895	24.9965	25.4722	24.9516		0.983904	0.256721
0.10383	1.18272	4CLL5	sp|Q84P21|4CLL5_ARATH 4-coumarate--CoA ligase-like 5 OS=Arabidopsis thaliana OX=3702 GN=4CLL5 PE=1 SV=2	26.2921	26.6687	26.2999	26.1443	26.1453	26.2539	26.0586	25.9788		0.983678	0.242105
0.10436	0.823909	PER37	sp|Q9LDN9|PER37_ARATH Peroxidase 37 OS=Arabidopsis thaliana OX=3702 GN=PER37 PE=2 SV=1	31.5428	31.6835	31.6522	31.634	31.8557	32.2475	31.5567	31.9704		0.981465	-0.279443
0.104368	1.15051	SFR2	sp|Q93Y07|SFR2_ARATH Galactolipid galactosyltransferase SFR2, chloroplastic OS=Arabidopsis thaliana OX=3702 GN=SFR2 PE=1 SV=1	25.537	25.2965	25.1923	25.4937	25.2909	24.9949	25.2664	25.1582		0.981434	0.20227
0.104371	0.811769	PIP2-1	sp|P43286|PIP21_ARATH Aquaporin PIP2-1 OS=Arabidopsis thaliana OX=3702 GN=PIP2-1 PE=1 SV=1	28.7566	28.6698	28.5499	28.9959	29.1219	28.8519	28.8357	29.3662		0.981421	-0.300858
0.104518	0.867083	EFTS	sp|Q5XF75|EFTS_ARATH Elongation factor Ts, mitochondrial OS=Arabidopsis thaliana OX=3702 GN=EFTS PE=1 SV=1	27.0638	27.0872	26.9842	27.1308	27.2966	27.2699	27.0095	27.5132		0.98081	-0.205758
0.104667	0.80896	At1g73430	sp|F4HQ84|COG3_ARATH Conserved oligomeric Golgi complex subunit 3 OS=Arabidopsis thaliana OX=3702 GN=COG3 PE=1 SV=1	25.8115	26.4212	25.7073	25.9673	26.3094	26.3474	26.2145	26.2593		0.980192	-0.30586
0.105007	1.13247	At2g31670	sp|Q9SIP1|UP3_ARATH Stress-response A/B barrel domain-containing protein UP3 OS=Arabidopsis thaliana OX=3702 GN=UP3 PE=1 SV=1	29.6602	29.5537	29.6005	29.7104	29.26	29.3708	29.5116	29.6644		0.978784	0.179478
0.105391	1.04549	RPT2A;RPT2B	sp|Q9SL67|PRS4B_ARATH 26S proteasome regulatory subunit 4 homolog B OS=Arabidopsis thaliana OX=3702 GN=RPT2B PE=1 SV=1;sp|Q9SZD4|PRS4A_ARATH 26S proteasome regulatory subunit 4 homolog A OS=Arabidopsis thaliana OX=3702 GN=RPT2A PE=1 SV=1	29.1681	29.0865	29.1476	29.1557	29.1086	29.0792	28.994	29.1194		0.977198	0.0641789
0.105791	0.62634	FTSZ1	sp|Q42545|FTSZ1_ARATH Cell division protein FtsZ homolog 1, chloroplastic OS=Arabidopsis thaliana OX=3702 GN=FTSZ1 PE=1 SV=2	26.1505	26.9923	26.5743	25.9442	26.5286	27.5262	27.5696	26.7369		0.975553	-0.674982
0.105908	0.705889	HISN1B	sp|Q8GSJ1|HIS1B_ARATH ATP phosphoribosyltransferase 2, chloroplastic OS=Arabidopsis thaliana OX=3702 GN=HISN1B PE=1 SV=1	25.1788	25.7565	25.4197	25.2489	25.5755	25.7679	26.5853	25.6852		0.975072	-0.502488
0.106701	3.37271	RABE1D	sp|Q9LZD4|RAE1D_ARATH Ras-related protein RABE1d OS=Arabidopsis thaliana OX=3702 GN=RABE1D PE=1 SV=1	26.6088	26.8545	26.8964	26.5605	23.497	23.2879	26.8083	26.3113		0.971832	1.75391
0.106719	1.88872	ADH1	sp|P06525|ADH1_ARATH Alcohol dehydrogenase class-P OS=Arabidopsis thaliana OX=3702 GN=ADH1 PE=1 SV=2	26.9742	27.1508	27.3004	26.1636	25.9841	26.3217	26.7714	24.8422		0.971757	0.917409
0.106863	1.185	UGT75B1	sp|Q9LR44|U75B1_ARATH UDP-glycosyltransferase 75B1 OS=Arabidopsis thaliana OX=3702 GN=UGT75B1 PE=1 SV=1	28.3007	28.4073	28.671	28.0805	28.2141	28.0676	28.0386	28.1596		0.971171	0.244889
0.106878	0.902806	VHA-a2	sp|Q9SJT7|VHAA2_ARATH V-type proton ATPase subunit a2 OS=Arabidopsis thaliana OX=3702 GN=VHA-a2 PE=1 SV=1	27.1441	27.2169	27.1712	27.0837	27.5084	27.2971	27.2057	27.1947		0.97111	-0.147511
0.10731	1.14551	At1g17160	sp|A1A6H3|RBSK_ARATH Ribokinase OS=Arabidopsis thaliana OX=3702 GN=RBSK PE=1 SV=1	26.2692	26.4221	26.2327	26.1202	26.0217	26.1507	25.8542	26.2337		0.969361	0.195986
0.107619	0.857357	UPP	sp|Q9M336|UPP_ARATH Uracil phosphoribosyltransferase, chloroplastic OS=Arabidopsis thaliana OX=3702 GN=UPP PE=1 SV=1	25.1261	25.2018	24.982	25.0022	25.1082	25.3666	25.5675	25.1579		0.968109	-0.222033
0.107883	1.22325	MO2	sp|O81816|MO2_ARATH Monooxygenase 2 OS=Arabidopsis thaliana OX=3702 GN=MO2 PE=2 SV=1	26.8024	26.7929	27.0449	26.432	26.6248	26.4499	26.5953	26.2394		0.967046	0.29072
0.107994	1.1511	CCR4-1	sp|Q8W0Z9|CCR4A_ARATH Carbon catabolite repressor protein 4 homolog 1 OS=Arabidopsis thaliana OX=3702 GN=CCR4-1 PE=2 SV=1	26.0848	25.8695	25.7378	25.8454	25.8751	25.6916	25.4872	25.6715		0.966602	0.203019
0.108137	1.1564	CYP708A2	sp|Q8L7D5|THAH_ARATH Cytochrome P450 708A2 OS=Arabidopsis thaliana OX=3702 GN=CYP708A2 PE=2 SV=3	28.0278	27.9326	27.5911	27.7598	27.7731	27.5518	27.528	27.6198		0.966024	0.209638
0.108406	1.13928	WIN2	sp|Q8RXV3|P2C59_ARATH Probable protein phosphatase 2C 59 OS=Arabidopsis thaliana OX=3702 GN=WIN2 PE=1 SV=1	25.8465	25.8088	26.0196	25.9155	25.8495	25.4746	25.6716	25.8422		0.964945	0.188118
0.108646	1.18416	ND1	sp|P92558|NU1M_ARATH NADH-ubiquinone oxidoreductase chain 1 OS=Arabidopsis thaliana OX=3702 GN=ND1 PE=1 SV=4	28.589	28.5204	28.7782	28.6014	28.5142	28.6389	28.1856	28.1748		0.963987	0.243865
0.108693	1.0403	IDH1	sp|Q8LFC0|IDH1_ARATH Isocitrate dehydrogenase [NAD] regulatory subunit 1, mitochondrial OS=Arabidopsis thaliana OX=3702 GN=IDH1 PE=1 SV=2	29.9028	29.8471	29.8504	29.823	29.8453	29.8391	29.75	29.761		0.963799	0.0570002
0.108939	1.18126	GLP4	sp|P94014|GL21_ARATH Germin-like protein subfamily 2 member 1 OS=Arabidopsis thaliana OX=3702 GN=GLP4 PE=2 SV=2	30.407	30.3463	30.586	30.1049	30.2441	30.2052	30.1456	29.8878		0.962819	0.240329
0.109125	1.31529	GRXC1	sp|Q8L8T2|GRXC1_ARATH Glutaredoxin-C1 OS=Arabidopsis thaliana OX=3702 GN=GRXC1 PE=2 SV=2	26.4979	26.5619	26.5946	25.9106	26.118	26.2104	26.0513	25.6038		0.962076	0.395381
0.109133	1.1088	UXS3	sp|Q9FIE8|UXS3_ARATH UDP-glucuronic acid decarboxylase 3 OS=Arabidopsis thaliana OX=3702 GN=UXS3 PE=1 SV=1	29.7519	29.7943	29.6679	29.7355	29.6283	29.6798	29.367	29.6785		0.962042	0.148993
0.109264	0.829182	TGA2;TGA6	sp|P43273|TGA2_ARATH Transcription factor TGA2 OS=Arabidopsis thaliana OX=3702 GN=TGA2 PE=1 SV=1;sp|Q39140|TGA6_ARATH Transcription factor TGA6 OS=Arabidopsis thaliana OX=3702 GN=TGA6 PE=1 SV=2	24.1159	24.4716	23.8018	24.0346	24.3675	24.3301	24.3229	24.4844		0.961524	-0.27024
0.109334	1.09479	ACT2;ACT8	sp|Q96292|ACT2_ARATH Actin-2 OS=Arabidopsis thaliana OX=3702 GN=ACT2 PE=1 SV=1;sp|Q96293|ACT8_ARATH Actin-8 OS=Arabidopsis thaliana OX=3702 GN=ACT8 PE=1 SV=2	31.9011	31.8794	31.8815	31.976	31.8252	31.852	31.5827	31.8553		0.961246	0.130649
0.10949	0.870987	RAE1	sp|Q38942|RAE1_ARATH Protein RAE1 OS=Arabidopsis thaliana OX=3702 GN=RAE1 PE=1 SV=2	25.5417	25.3639	25.5427	25.4016	25.7901	25.7519	25.3785	25.7267		0.960625	-0.199276
0.109973	0.886469	ALY3	sp|Q94EH8|THO4C_ARATH THO complex subunit 4C OS=Arabidopsis thaliana OX=3702 GN=ALY3 PE=1 SV=1	26.376	26.2487	26.1869	26.2022	26.5489	26.5809	26.2403	26.3391		0.958715	-0.173858
0.109984	0.921447	SKIP	sp|O80653|SKIP_ARATH SNW/SKI-interacting protein OS=Arabidopsis thaliana OX=3702 GN=SKIP PE=1 SV=1	25.994	26.0223	25.8983	25.9637	26.2286	26.1302	25.979	26.0127		0.958669	-0.118027
0.110109	0.538591	PUX3	sp|Q9SUG6|PUX3_ARATH Plant UBX domain-containing protein 3 OS=Arabidopsis thaliana OX=3702 GN=PUX3 PE=1 SV=1	24.4342	25.0049	24.5	22.9649	24.8602	24.9284	25.6632	25.0233		0.958178	-0.892737
0.11044	0.853135	APK1	sp|Q43295|APK1_ARATH Adenylyl-sulfate kinase 1, chloroplastic OS=Arabidopsis thaliana OX=3702 GN=APK1 PE=1 SV=1	26.271	26.2757	26.0452	26.3625	26.56	26.5467	26.1639	26.6005		0.956873	-0.229154
0.110517	0.846574	GRXS12	sp|Q8LBS4|GRS12_ARATH Monothiol glutaredoxin-S12, chloroplastic OS=Arabidopsis thaliana OX=3702 GN=GRXS12 PE=1 SV=2	28.011	27.9358	27.8443	28.2632	28.3484	28.4448	28.0251	28.1972		0.956572	-0.240293
0.110813	0.93237		sp|Q8L7B5|CH60B_ARATH Chaperonin CPN60-like 1, mitochondrial OS=Arabidopsis thaliana OX=3702 GN=At2g33210 PE=1 SV=1	28.8543	28.772	28.8689	28.9206	28.9916	28.8529	28.9178	29.0576		0.955408	-0.101026
0.110846	0.383473		sp|O23174|SLU7B_ARATH Pre-mRNA-splicing factor SLU7-B OS=Arabidopsis thaliana OX=3702 GN=At4g37120 PE=2 SV=3	23.7442	23.0385	25.7301	23.2687	25.7239	25.8092	24.0864	25.6932		0.955281	-1.3828
0.110853	1.2456		sp|Q9STL8|UFSP_ARATH Probable Ufm1-specific protease OS=Arabidopsis thaliana OX=3702 GN=At3g48380 PE=1 SV=2	25.5385	25.5069	25.2223	25.5791	24.8137	25.4203	24.9742	25.3712		0.955254	0.316841
0.111114	1.4183		sp|Q9FIN1|6PGL4_ARATH Probable 6-phosphogluconolactonase 4 OS=Arabidopsis thaliana OX=3702 GN=PGL4 PE=2 SV=1	25.0206	24.7841	24.9317	24.6229	24.58	23.5694	24.5791	24.6141		0.954231	0.504165
0.111264	0.90086	ALEU	sp|Q8H166|ALEU_ARATH Thiol protease aleurain OS=Arabidopsis thaliana OX=3702 GN=ALEU PE=1 SV=2	28.1191	28.203	28.2782	28.377	28.4534	28.5311	28.274	28.3213		0.953645	-0.150626
0.111328	1.24624	IMPA6	sp|Q9FWY7|IMPA6_ARATH Importin subunit alpha-6 OS=Arabidopsis thaliana OX=3702 GN=IMPA6 PE=1 SV=1	28.5411	28.7577	28.3571	28.7656	28.4588	28.3303	27.8817	28.4804		0.953394	0.31758
0.111504	2.47651	UGT84A3	sp|O23401|U84A3_ARATH UDP-glycosyltransferase 84A3 OS=Arabidopsis thaliana OX=3702 GN=UGT84A3 PE=1 SV=1	25.8293	26.0868	26.0872	24.1483	25.7666	23.9977	23.6784	23.4757		0.952711	1.30831
0.111961	2.19854	PAS2	sp|Q8VZB2|HACD_ARATH Very-long-chain (3R)-3-hydroxyacyl-CoA dehydratase PASTICCINO 2 OS=Arabidopsis thaliana OX=3702 GN=PAS2 PE=1 SV=1	26.0391	25.812	26.0515	25.9515	23.7831	23.7686	25.9688	25.7874		0.950932	1.13654
0.112038	1.52037	T12J5.30	sp|Q9T003|ASMT_ARATH Acetylserotonin O-methyltransferase OS=Arabidopsis thaliana OX=3702 GN=ASMT PE=1 SV=1	25.5789	25.8221	25.3835	26.1879	25.4876	24.5835	24.7653	25.7183		0.950635	0.604421
0.112417	0.753613	AK2	sp|O23653|AK2_ARATH Aspartokinase 2, chloroplastic OS=Arabidopsis thaliana OX=3702 GN=AK2 PE=1 SV=2	24.6021	24.6373	24.5226	24.9056	24.6155	25.6011	25.094	24.9895		0.949168	-0.408104
0.112429	0.884908	PLDDELTA	sp|Q9C5Y0|PLDD1_ARATH Phospholipase D delta OS=Arabidopsis thaliana OX=3702 GN=PLDDELTA PE=1 SV=2	26.7218	26.7031	26.469	26.822	26.9553	26.8168	26.7069	26.9426		0.949123	-0.1764
0.112591	1.12162	EIF2 ALPHA	sp|Q9FE78|IF2A_ARATH Eukaryotic translation initiation factor 2 subunit alpha OS=Arabidopsis thaliana OX=3702 GN=EIF2A PE=1 SV=1	27.2895	27.026	26.9217	26.9855	26.9485	26.8622	26.7965	26.9533		0.948497	0.165581
0.1127	0.941014	ASP5	sp|P46248|AAT5_ARATH Aspartate aminotransferase, chloroplastic OS=Arabidopsis thaliana OX=3702 GN=ASP5 PE=1 SV=2	29.7873	29.7385	29.8953	29.7062	29.8652	29.89	29.915	29.8081		0.948075	-0.0877123
0.113095	0.639838	LYM2	sp|O23006|LYM2_ARATH LysM domain-containing GPI-anchored protein 2 OS=Arabidopsis thaliana OX=3702 GN=LYM2 PE=1 SV=1	25.7708	25.8672	26.4912	25.5505	26.5489	26.9597	26.9788	25.7693		0.946555	-0.64422
0.114061	0.911385	At1g12470	sp|F4IDS7|VPS18_ARATH Vacuolar sorting protein 18 OS=Arabidopsis thaliana OX=3702 GN=VPS18 PE=1 SV=1	29.6546	29.6622	29.7484	29.7459	29.8792	29.9951	29.6732	29.7992		0.942861	-0.133867
0.114322	0.896124	F15B8.150	sp|Q9SVY0|NRPA1_ARATH DNA-directed RNA polymerase I subunit 1 OS=Arabidopsis thaliana OX=3702 GN=NRPA1 PE=3 SV=1	25.1426	25.2101	25.0201	25.3617	25.2707	25.2848	25.3327	25.4792		0.941871	-0.15823
0.114562	0.81576	BETA;BTHETA	sp|Q8LF36|2A5T_ARATH Serine/threonine protein phosphatase 2A 57 kDa regulatory subunit B theta isoform;sp|Q9LU89|2A5N_ARATH Serine/threonine protein phosphatase 2A 59 kDa regulatory subunit B eta isoform OS=Arabidopsis thaliana OX=3702 GN=BETA PE=1 SV=1	24.6788	25.1734	24.7196	25.1087	25.0841	25.4537	25.0456	25.2724		0.940961	-0.293783
0.114626	0.919679	LON1	sp|P93655|LONM1_ARATH Lon protease homolog 1, mitochondrial OS=Arabidopsis thaliana OX=3702 GN=LON1 PE=1 SV=2	26.979	27.0708	27.2656	27.0637	27.2788	27.2248	27.1971	27.1616		0.940715	-0.120797
0.115542	0.847457	AIR3	sp|Q9ZSP5|AIR3_ARATH Subtilisin-like protease SBT5.3 OS=Arabidopsis thaliana OX=3702 GN=AIR3 PE=2 SV=1	27.5513	27.5793	27.629	27.6204	27.6487	27.8522	27.6434	28.1909		0.937259	-0.238787
0.115637	1.17026	SEC6	sp|Q94AI6|SEC6_ARATH Exocyst complex component SEC6 OS=Arabidopsis thaliana OX=3702 GN=SEC6 PE=1 SV=1	25.9963	25.9131	26.2071	25.6637	25.5984	25.8031	25.6686	25.8029		0.936902	0.226832
0.115942	1.17346	4CLL7	sp|Q9M0X9|4CLL7_ARATH 4-coumarate--CoA ligase-like 7 OS=Arabidopsis thaliana OX=3702 GN=4CLL7 PE=1 SV=1	28.0477	28.1194	28.1162	27.7955	27.7814	28.0575	27.7388	27.578		0.935758	0.23077
0.116195	0.845368	GDH2	sp|O82179|GCSH2_ARATH Glycine cleavage system H protein 2, mitochondrial OS=Arabidopsis thaliana OX=3702 GN=GDH2 PE=2 SV=1	30.1044	30.1352	30.0299	30.3018	30.0919	30.432	30.3483	30.6684		0.934811	-0.242349
0.116277	1.32068	LAC7	sp|Q9SR40|LAC7_ARATH Laccase-7 OS=Arabidopsis thaliana OX=3702 GN=LAC7 PE=2 SV=1	28.6897	28.7781	28.6375	28.2288	28.326	28.6153	27.9981	27.7895		0.934507	0.401282
0.116402	1.11138	CPK1	sp|Q06850|CDPK1_ARATH Calcium-dependent protein kinase 1 OS=Arabidopsis thaliana OX=3702 GN=CPK1 PE=1 SV=1	26.1032	26.1233	26.0139	26.0731	26.0399	26.0078	25.6918	25.9646		0.934039	0.152357
0.116506	1.14276		sp|Q9S7T8|SPZX_ARATH Serpin-ZX OS=Arabidopsis thaliana OX=3702 GN=At1g47710 PE=1 SV=1	27.3369	27.3685	27.3478	27.0984	27.1381	27.3142	26.9599	26.9693		0.933652	0.192521
0.116829	1.21964	ERDJ3B	sp|Q9LZK5|DNJ19_ARATH DnaJ protein ERDJ3B OS=Arabidopsis thaliana OX=3702 GN=ERDJ3B PE=1 SV=1	27.6831	27.9349	27.3984	27.698	27.2572	27.4438	27.184	27.6835		0.932448	0.28646
0.117251	2.12943	AHP5	sp|Q8L9T7|AHP5_ARATH Histidine-containing phosphotransfer protein 5 OS=Arabidopsis thaliana OX=3702 GN=AHP5 PE=1 SV=2	25.0466	25.0742	24.9665	24.2562	22.3819	24.9087	24.3849	23.3062		0.930882	1.09047
0.117384	0.796082	At2g22125	sp|F4IIM1|CSI1_ARATH Protein CELLULOSE SYNTHASE INTERACTIVE 1 OS=Arabidopsis thaliana OX=3702 GN=CSI1 PE=1 SV=1	26.5912	26.7548	26.3041	26.7962	26.7116	27.0524	26.7098	27.2887		0.930392	-0.329012
0.117558	1.11821		sp|Q9CAA0|COB21_ARATH Coatomer subunit beta-1 OS=Arabidopsis thaliana OX=3702 GN=At1g79990 PE=2 SV=2	28.6933	28.6595	28.5978	28.6469	28.5333	28.5096	28.2499	28.6599		0.929749	0.161188
0.11759	0.870498	ABCG36	sp|Q9XIE2|AB36G_ARATH ABC transporter G family member 36 OS=Arabidopsis thaliana OX=3702 GN=ABCG36 PE=1 SV=1	26.8898	27.0827	26.7955	26.6657	27.0637	27.2398	26.9391	26.9915		0.929631	-0.200087
0.117657	1.16049	T12E18_50	sp|Q9M2V1|NCA1_ARATH Protein NCA1 OS=Arabidopsis thaliana OX=3702 GN=NCA1 PE=1 SV=1	24.98	25.0985	25.0206	25.1228	25.0218	24.835	24.9817	24.5245		0.929382	0.214739
0.117958	0.854285		sp|Q6NPR7|PMTO_ARATH Probable methyltransferase PMT24 OS=Arabidopsis thaliana OX=3702 GN=At1g29470 PE=2 SV=1	28.4373	28.304	28.2116	28.6988	28.6119	28.5613	28.5545	28.8329		0.928273	-0.22721
0.118265	1.06897	ALDH10A8	sp|Q9S795|BADH1_ARATH Betaine aldehyde dehydrogenase 1, chloroplastic OS=Arabidopsis thaliana OX=3702 GN=ALDH10A8 PE=2 SV=1	29.5783	29.603	29.495	29.6189	29.4223	29.5205	29.3853	29.5821		0.927145	0.0962176
0.118292	1.17764	FKBP15-2	sp|Q38936|FK152_ARATH Peptidyl-prolyl cis-trans isomerase FKBP15-2 OS=Arabidopsis thaliana OX=3702 GN=FKBP15-2 PE=2 SV=2	28.265	28.3951	28.1233	28.3003	28.0413	28.1901	27.7035	28.2053		0.927046	0.235896
0.118539	2.13097		sp|O65378|ACCO3_ARATH 1-aminocyclopropane-1-carboxylate oxidase 3 OS=Arabidopsis thaliana OX=3702 GN=At1g12010 PE=2 SV=1	24.3797	25.318	25.8766	24.4933	25.0044	23.2772	22.9594	24.4606		0.92614	1.09151
0.118674	0.780048	BCCP1	sp|Q42533|BCCP1_ARATH Biotin carboxyl carrier protein of acetyl-CoA carboxylase 1, chloroplastic OS=Arabidopsis thaliana OX=3702 GN=BCCP1 PE=1 SV=2	27.77	27.8433	27.6453	27.9025	27.9559	27.9854	27.9384	28.7149		0.925645	-0.358366
0.118731	0.785745	EXPA18	sp|Q9LQ07|EXP18_ARATH Expansin-A18 OS=Arabidopsis thaliana OX=3702 GN=EXPA18 PE=2 SV=1	25.4619	25.0442	24.9075	24.9722	25.604	25.768	25.2481	25.1571		0.925436	-0.347866
0.118807	0.491077	LIP1	sp|Q9ZWT1|LIAS_ARATH Lipoyl synthase, mitochondrial OS=Arabidopsis thaliana OX=3702 GN=LIP1 PE=1 SV=1	25.2252	23.0887	25.2455	25.4651	25.5567	25.7915	25.9152	25.8652		0.925159	-1.02598
0.119093	0.877595	TIM17-2	sp|Q9SP35|TI172_ARATH Mitochondrial import inner membrane translocase subunit TIM17-2 OS=Arabidopsis thaliana OX=3702 GN=TIM17-2 PE=1 SV=2	26.8858	26.7705	26.7603	26.8822	26.9862	27.2217	26.7577	27.0866		0.924115	-0.188372
0.119395	0.875905	KEU	sp|Q9C5X3|KEULE_ARATH SNARE-interacting protein KEULE OS=Arabidopsis thaliana OX=3702 GN=KEU PE=1 SV=2	25.4237	25.5215	25.5925	25.4054	25.7039	25.8587	25.4074	25.7377		0.923013	-0.191154
0.119473	0.935615	PSAT1	sp|Q96255|SERB1_ARATH Phosphoserine aminotransferase 1, chloroplastic OS=Arabidopsis thaliana OX=3702 GN=PSAT1 PE=1 SV=1	29.9786	29.9762	29.9717	29.9104	30.0933	30.0965	29.9058	30.1253		0.92273	-0.0960126
0.12027	1.06027	PUB1	sp|Q9LF41|UBE4_ARATH Probable ubiquitin conjugation factor E4 OS=Arabidopsis thaliana OX=3702 GN=PUB1 PE=2 SV=1	28.5667	28.6178	28.5775	28.5331	28.5919	28.5127	28.3848	28.468		0.919843	0.0844374
0.120317	1.23487	GSTZ1	sp|Q9ZVQ3|GSTZ1_ARATH Glutathione S-transferase Z1 OS=Arabidopsis thaliana OX=3702 GN=GSTZ1 PE=1 SV=1	29.663	29.8417	30.0139	29.3437	29.5349	29.3745	29.5588	29.1766		0.919672	0.30436
0.120499	0.837128	WLIM1	sp|Q94JX5|WLIM1_ARATH LIM domain-containing protein WLIM1 OS=Arabidopsis thaliana OX=3702 GN=WLIM1 PE=1 SV=1	26.0718	25.8767	25.9512	26.1154	26.5064	26.4276	26.1783	25.9286		0.919016	-0.25648
0.120842	1.12588	PDIL5-2	sp|Q94F09|PDI52_ARATH Protein disulfide-isomerase 5-2 OS=Arabidopsis thaliana OX=3702 GN=PDIL5-2 PE=1 SV=1	27.304	27.3898	27.4923	27.2466	27.2915	27.1627	26.9761	27.3182		0.917783	0.171053
0.121062	0.885669	ABCC1	sp|Q9C8G9|AB1C_ARATH ABC transporter C family member 1 OS=Arabidopsis thaliana OX=3702 GN=ABCC1 PE=1 SV=1	28.8136	28.8809	29.0354	28.6118	29.0618	29.0808	29.0024	28.8973		0.916991	-0.17516
0.12112	0.944564	TKL-2	sp|F4IW47|TKTC2_ARATH Transketolase-2, chloroplastic OS=Arabidopsis thaliana OX=3702 GN=TKL-2 PE=1 SV=1	28.6274	28.6849	28.6521	28.6249	28.7943	28.7574	28.6016	28.7652		0.916784	-0.0822797
0.121218	1.07801	UEV1D	sp|Q9SVD7|UEV1D_ARATH Ubiquitin-conjugating enzyme E2 variant 1D OS=Arabidopsis thaliana OX=3702 GN=UEV1D PE=1 SV=1	27.7584	27.6487	27.5959	27.7102	27.5927	27.6716	27.4384	27.577		0.916433	0.108367
0.121325	1.23038	UGT89A2	sp|Q9LZD8|U89A2_ARATH UDP-glycosyltransferase 89A2 OS=Arabidopsis thaliana OX=3702 GN=UGT89A2 PE=2 SV=1	24.4642	24.69	24.6999	24.098	24.3919	24.216	24.1815	23.9662		0.916048	0.299108
0.121367	1.27524	PGM	sp|Q8GY96|PGM_ARATH Phosphoglycerate mutase-like protein OS=Arabidopsis thaliana OX=3702 GN=PGM PE=2 SV=1	27.2434	26.9909	27.3498	27.7307	27.2336	26.8336	26.7246	27.1198		0.915899	0.350774
0.121412	0.802333	PATL1	sp|Q56WK6|PATL1_ARATH Patellin-1 OS=Arabidopsis thaliana OX=3702 GN=PATL1 PE=1 SV=2	27.2703	27.2747	26.8089	27.5872	27.6495	27.4301	27.4258	27.7066		0.915739	-0.317728
0.121723	0.893286	EMB3003	sp|Q9C8P0|ODP25_ARATH Dihydrolipoyllysine-residue acetyltransferase component 5 of pyruvate dehydrogenase complex, chloroplastic OS=Arabidopsis thaliana OX=3702 GN=EMB3003 PE=2 SV=1	28.6673	28.7021	28.6077	28.8569	28.8678	28.8886	28.6859	29.0428		0.914627	-0.162806
0.121803	1.16544	PA200	sp|F4JC97|PSME4_ARATH Proteasome activator subunit 4 OS=Arabidopsis thaliana OX=3702 GN=PA200 PE=2 SV=2	27.253	27.3023	27.4608	26.9861	27.0738	27.1805	27.0321	26.8322		0.914343	0.22088
0.121877	0.890653	Y14	sp|F4I9J7|Y14_ARATH RNA-binding protein Y14 OS=Arabidopsis thaliana OX=3702 GN=Y14 PE=1 SV=1	27.9164	27.6511	27.815	27.9143	28.0385	27.9694	27.8148	28.1423		0.91408	-0.167065
0.12204	1.16593	QQT2	sp|Q8W586|QQT2_ARATH GPN-loop GTPase QQT2 OS=Arabidopsis thaliana OX=3702 GN=QQT2 PE=1 SV=1	25.2992	25.3943	25.462	25.2382	25.3277	25.2485	24.8155	25.1161		0.913499	0.221482
0.123128	1.62125	At2g40620	sp|O22873|BZP18_ARATH bZIP transcription factor 18 OS=Arabidopsis thaliana OX=3702 GN=BZIP18 PE=1 SV=1	25.1243	24.8563	24.8312	25.2866	24.8861	24.9754	23.4004	24.0481		0.909643	0.697106
0.123524	0.791459	TOM5	sp|Q9SD80|TOM5_ARATH Mitochondrial import receptor subunit TOM5 homolog OS=Arabidopsis thaliana OX=3702 GN=TOM5 PE=1 SV=3	27.8245	27.4765	28.0187	27.774	28.2412	27.6572	28.2666	28.2783		0.90825	-0.337413
0.123695	0.768215	CPN21	sp|O65282|CH20_ARATH 20 kDa chaperonin, chloroplastic OS=Arabidopsis thaliana OX=3702 GN=CPN20 PE=1 SV=2	29.5487	29.4944	29.4537	29.7444	29.6856	29.6111	30.5048	29.9613		0.907648	-0.380418
0.123991	1.09462	MTHFR1	sp|Q9SE60|MTHR1_ARATH Methylenetetrahydrofolate reductase 1 OS=Arabidopsis thaliana OX=3702 GN=MTHFR1 PE=1 SV=1	30.0212	30.0977	29.9499	30.1962	29.8988	29.8901	29.8688	30.0856		0.906611	0.130431
0.124133	0.199033	NRPD1	sp|Q9LQ02|NRPD1_ARATH DNA-directed RNA polymerase IV subunit 1 OS=Arabidopsis thaliana OX=3702 GN=NRPD1 PE=1 SV=1	23.6568	28.4279	28.3644	24.1443	28.6186	28.471	28.3186	28.5009		0.906114	-2.32892
0.124175	0.372325		sp|Q9SUS9|RDL5_ARATH Probable cysteine protease RDL5 OS=Arabidopsis thaliana OX=3702 GN=RDL5 PE=2 SV=1	24.6822	22.6941	25.6741	26.2426	26.3686	26.3052	26.5542	25.7664		0.905965	-1.42537
0.124508	1.11193	SNX1	sp|Q9FG38|SNX1_ARATH Sorting nexin 1 OS=Arabidopsis thaliana OX=3702 GN=SNX1 PE=1 SV=1	26.5129	26.5464	26.5145	26.573	26.5354	26.3235	26.1722	26.5036		0.904803	0.153067
0.124515	0.668712	PIP2-3	sp|P30302|PIP23_ARATH Aquaporin PIP2-3 OS=Arabidopsis thaliana OX=3702 GN=PIP2-3 PE=1 SV=1	24.0491	24.4741	24.1294	23.0759	24.7445	24.1548	24.5851	24.5662		0.904778	-0.580543
0.12464	0.823001	LIG1	sp|Q42572|DNLI1_ARATH DNA ligase 1 OS=Arabidopsis thaliana OX=3702 GN=LIG1 PE=2 SV=2	24.9169	25.363	25.0635	25.2345	25.4021	25.4397	25.1279	25.7324		0.904344	-0.281034
0.125171	1.20233	CDC48D	sp|Q9SCN8|CD48D_ARATH Cell division control protein 48 homolog D OS=Arabidopsis thaliana OX=3702 GN=CDC48D PE=1 SV=1	26.6074	26.4883	26.8064	26.3061	26.4688	26.4267	26.2467	26.0027		0.902495	0.265832
0.125179	0.89157	PWP2	sp|Q8VYZ5|PWP2_ARATH Periodic tryptophan protein 2 OS=Arabidopsis thaliana OX=3702 GN=PWP2 PE=1 SV=1	24.5916	24.8108	24.8118	24.7543	25.0898	24.8264	24.7422	24.9723		0.902469	-0.16558
0.125345	1.47816	MEE23	sp|O64743|BBE15_ARATH Berberine bridge enzyme-like 15 OS=Arabidopsis thaliana OX=3702 GN=MEE23 PE=1 SV=1	26.2278	26.3005	25.6359	26.5528	25.7353	25.7853	24.8932	26.048		0.901893	0.563806
0.12561	1.30498		sp|Q8VY92|P24DA_ARATH Transmembrane emp24 domain-containing protein p24delta10 OS=Arabidopsis thaliana OX=3702 GN=At1g69460 PE=1 SV=1	27.3608	27.6722	27.3317	27.3312	26.6589	26.7358	27.336	27.4289		0.900976	0.384024
0.125715	1.17808	CXE18	sp|Q9LT10|CXE18_ARATH Probable carboxylesterase 18 OS=Arabidopsis thaliana OX=3702 GN=CXE18 PE=1 SV=1	25.4532	25.481	25.1907	25.7106	25.4251	25.0354	25.2056	25.2238		0.900613	0.236432
0.125968	0.895904	HLP	sp|Q93Z17|HLP_ARATH 50S ribosomal protein HLP, mitochondrial OS=Arabidopsis thaliana OX=3702 GN=HLP PE=1 SV=1	26.5006	26.6594	26.4042	26.5386	26.5931	26.6791	26.5756	26.8893		0.899741	-0.158583
0.126403	1.10669	TIF3B1	sp|Q9C5Z1|EIF3B_ARATH Eukaryotic translation initiation factor 3 subunit B OS=Arabidopsis thaliana OX=3702 GN=TIF3B1 PE=1 SV=1	28.8687	28.8191	28.8496	28.8631	28.8395	28.7691	28.467	28.7399		0.898242	0.146252
0.126585	0.604768	PER71	sp|Q43387|PER71_ARATH Peroxidase 71 OS=Arabidopsis thaliana OX=3702 GN=PER71 PE=1 SV=1	25.2133	25.7313	25.1077	25.1474	25.3599	27.0752	25.5718	26.095		0.897616	-0.725547
0.126664	1.52208	P1	sp|Q39172|AER_ARATH NADPH-dependent oxidoreductase 2-alkenal reductase OS=Arabidopsis thaliana OX=3702 GN=AER PE=1 SV=1	28.2227	28.4932	28.793	27.6139	27.5555	27.6555	28.302	27.1857		0.897348	0.606045
0.126673	0.918332	At2g05920	sp|Q9ZUF6|SBT18_ARATH Subtilisin-like protease SBT1.8 OS=Arabidopsis thaliana OX=3702 GN=SBT1.8 PE=1 SV=1	28.1575	28.1437	27.9939	28.1421	28.1583	28.2264	28.1473	28.3968		0.897315	-0.122912
0.126929	1.14178		sp|Q9T0K7|HIBC6_ARATH 3-hydroxyisobutyryl-CoA hydrolase-like protein 3, mitochondrial OS=Arabidopsis thaliana OX=3702 GN=At4g13360 PE=1 SV=2	28.2724	28.3588	28.2832	28.0212	28.0901	28.069	28.1921	27.8192		0.896438	0.191289
0.127016	1.10574	VPS26A	sp|Q9FJD0|VP26A_ARATH Vacuolar protein sorting-associated protein 26A OS=Arabidopsis thaliana OX=3702 GN=VPS26A PE=2 SV=1	26.7338	26.7857	26.6592	26.5899	26.5702	26.6129	26.3451	26.6603		0.89614	0.145014
0.127186	1.14088	CYP20-1	sp|Q9SP02|CP20A_ARATH Peptidyl-prolyl cis-trans isomerase CYP20-1 OS=Arabidopsis thaliana OX=3702 GN=CYP20-1 PE=1 SV=1	28.7497	28.6637	28.6765	28.6298	28.4672	28.7014	28.2112	28.5793		0.895561	0.190145
0.127376	1.156	SAHH2	sp|Q9LK36|SAHH2_ARATH Adenosylhomocysteinase 2 OS=Arabidopsis thaliana OX=3702 GN=SAHH2 PE=2 SV=1	29.4297	29.6088	29.3234	29.3643	28.987	29.1336	29.431	29.338		0.894913	0.209147
0.127537	7.84349	RPL27AB	sp|Q9LR33|R27A2_ARATH 60S ribosomal protein L27a-2 OS=Arabidopsis thaliana OX=3702 GN=RPL27AB PE=2 SV=1	29.2994	29.3571	29.196	29.2957	23.7015	23.122	29.2087	29.2301		0.894365	2.9715
0.128068	1.17027	SGT1	sp|Q8VYF9|SRGT1_ARATH Peptidyl serine alpha-galactosyltransferase OS=Arabidopsis thaliana OX=3702 GN=SERGT1 PE=2 SV=1	27.4168	27.3178	27.1528	27.5417	27.246	27.1794	26.8383	27.258		0.892558	0.226839
0.128087	0.318713	RBP47C	sp|Q9SX79|RB47C_ARATH Polyadenylate-binding protein RBP47C OS=Arabidopsis thaliana OX=3702 GN=RBP47C PE=2 SV=1	23.9602	23.7019	25.1744	26.0116	26.7372	27.4083	24.1091	27.1922		0.892494	-1.64967
0.128719	0.85841	VRN1	sp|Q8L3W1|VRN1_ARATH B3 domain-containing transcription factor VRN1 OS=Arabidopsis thaliana OX=3702 GN=VRN1 PE=1 SV=1	25.7305	26.0821	25.6514	26.0013	26.1899	26.1811	25.8899	26.0853		0.890359	-0.220261
0.128828	1.15681	ARA1	sp|O23461|ARAK_ARATH L-arabinokinase OS=Arabidopsis thaliana OX=3702 GN=ARA1 PE=1 SV=1	27.2712	27.3637	27.3202	27.2759	26.9349	26.988	27.4457	27.0217		0.889989	0.210156
0.128833	0.822104	PSP	sp|O82796|SERC_ARATH Phosphoserine phosphatase, chloroplastic OS=Arabidopsis thaliana OX=3702 GN=PSP PE=1 SV=2	26.0362	26.1775	25.8609	26.1518	26.1119	26.6174	26.0724	26.5552		0.889974	-0.282607
0.129221	0.826105	HEMB1	sp|Q9SFH9|HEM21_ARATH Delta-aminolevulinic acid dehydratase 1, chloroplastic OS=Arabidopsis thaliana OX=3702 GN=HEMB1 PE=2 SV=1	26.6622	26.6738	26.7189	26.3294	26.7124	26.8024	27.2524	26.7196		0.888666	-0.275602
0.129761	0.230502	PABN1	sp|Q93VI4|PABN1_ARATH Polyadenylate-binding protein 1 OS=Arabidopsis thaliana OX=3702 GN=PABN1 PE=1 SV=1	24.8148	23.0477	27.9872	27.8467	28.0298	28.0685	28.0663	28.0005		0.886854	-2.11715
0.130062	2.98646	GLCAK1	sp|Q93ZC9|GLAK1_ARATH Glucuronokinase 1 OS=Arabidopsis thaliana OX=3702 GN=GLCAK1 PE=1 SV=1	27.3076	27.4859	27.3305	27.3669	23.9401	27.297	24.5653	27.3748		0.885851	1.57843
0.130512	0.903867		sp|Q0WQ57|AUXI2_ARATH Auxilin-related protein 2 OS=Arabidopsis thaliana OX=3702 GN=At4g12770 PE=1 SV=1;sp|Q9SU08|AUXI1_ARATH Auxilin-related protein 1 OS=Arabidopsis thaliana OX=3702 GN=AUXI1 PE=1 SV=2	25.6543	25.5362	25.7509	25.8434	25.7562	25.9669	25.7614	25.8836		0.884351	-0.145818
0.130828	0.648997	ABCC8	sp|Q8LGU1|AB8C_ARATH ABC transporter C family member 8 OS=Arabidopsis thaliana OX=3702 GN=ABCC8 PE=2 SV=3	23.0424	24.4033	24.4769	24.1895	24.52	24.3906	24.9556	24.7408		0.883301	-0.623717
0.13152	0.704593	NDPK2	sp|O64903|NDK2_ARATH Nucleoside diphosphate kinase II, chloroplastic OS=Arabidopsis thaliana OX=3702 GN=NDPK2 PE=1 SV=2	26.0561	26.294	25.8185	26.1608	26.1732	26.5986	27.3507	26.2275		0.881007	-0.505139
0.131572	0.847071	PER27	sp|Q43735|PER27_ARATH Peroxidase 27 OS=Arabidopsis thaliana OX=3702 GN=PER27 PE=1 SV=1	29.0312	28.9086	28.9287	28.842	29.154	29.4872	28.8437	29.1834		0.880838	-0.239445
0.131645	0.883176	FLA2	sp|Q9SU13|FLA2_ARATH Fasciclin-like arabinogalactan protein 2 OS=Arabidopsis thaliana OX=3702 GN=FLA2 PE=2 SV=1	27.9591	28.0289	28.0756	28.095	28.345	28.0714	28.0323	28.4267		0.880596	-0.179227
0.131863	0.215298		sp|O22912|CX5C1_ARATH Probable cytochrome c oxidase subunit 5C-1 OS=Arabidopsis thaliana OX=3702 GN=At2g47380 PE=1 SV=1;sp|Q9LZQ0|CX5C2_ARATH Cytochrome c oxidase subunit 5C-2 OS=Arabidopsis thaliana OX=3702 GN=At3g62400 PE=3 SV=1	24.7213	23.3756	27.9487	24.1595	28.2211	28.0775	27.8242	24.9447		0.879877	-2.21559
0.131889	1.21452	ETFQO	sp|O22854|ETFQO_ARATH Electron transfer flavoprotein-ubiquinone oxidoreductase, mitochondrial OS=Arabidopsis thaliana OX=3702 GN=ETFQO PE=2 SV=1	24.4184	24.807	24.4834	24.758	24.1343	24.1454	24.3867	24.6788		0.879792	0.280383
0.132189	0.943887	VDAC3	sp|Q9SMX3|VDAC3_ARATH Mitochondrial outer membrane protein porin 3 OS=Arabidopsis thaliana OX=3702 GN=VDAC3 PE=1 SV=3	31.5774	31.4556	31.4897	31.5822	31.5612	31.6121	31.555	31.7098		0.878804	-0.0833139
0.132215	1.16737	HRD3A	sp|Q9LM25|HRD3A_ARATH ERAD-associated E3 ubiquitin-protein ligase component HRD3A OS=Arabidopsis thaliana OX=3702 GN=HRD3A PE=1 SV=1	26.0124	26.0337	26.0273	25.9607	26.0623	25.865	25.4533	25.7603		0.87872	0.223267
0.132285	1.09607	SYNC1	sp|Q9SW96|SYNC1_ARATH Asparagine--tRNA ligase, cytoplasmic 1 OS=Arabidopsis thaliana OX=3702 GN=SYNC1 PE=1 SV=1	28.5656	28.5996	28.4978	28.5488	28.5276	28.4769	28.2049	28.4731		0.878491	0.132335
0.132532	1.21315	ERF1-3	sp|P35614|ERF1Z_ARATH Eukaryotic peptide chain release factor subunit 1-3 OS=Arabidopsis thaliana OX=3702 GN=ERF1-3 PE=1 SV=1	26.2902	26.5436	26.249	26.1849	26.1111	26.2899	25.6386	26.1131		0.877678	0.27876
0.132639	0.793738	BAK1;SERK1;SERK5;SERK4;SERK2	sp|Q8LPS5|SER;sp|Q94AG2|SERK1_ARATH Somatic embryogenesis receptor kinase 1 OS=Arabidopsis thaliana OX=3702 GN=SERK1 PE=1 SV=2;sp|Q94F62|BAK1_ARATH BRASSINOSTEROID INSENSITIVE 1-associated receptor kinase 1 OS=Arabidopsis thaliana OX=3702 GN=BAK1 PE=1 SV=2	25.3497	24.9489	24.8098	25.2051	25.129	25.7881	25.2306	25.4988		0.87733	-0.333266
0.132697	0.108833		sp|P80828|CWP04_ARATH 54 kDa cell wall protein (Fragment) OS=Arabidopsis thaliana OX=3702 PE=1 SV=1	23.9408	22.4178	23.3766	28.8772	29.083	29.055	24.4304	28.8433		0.877138	-3.19982
0.132723	0.924842	RPL6A	sp|Q9FZ76|RL61_ARATH 60S ribosomal protein L6-1 OS=Arabidopsis thaliana OX=3702 GN=RPL6A PE=2 SV=1	31.6461	31.4882	31.5274	31.6937	31.7295	31.577	31.7753	31.7243		0.877054	-0.11272
0.13284	1.15308	BSL1	sp|Q8L7U5|BSL1_ARATH Serine/threonine-protein phosphatase BSL1 OS=Arabidopsis thaliana OX=3702 GN=BSL1 PE=1 SV=2	26.1244	26.3384	25.9998	26.0316	25.9543	26.1547	25.8219	25.7413		0.87667	0.205493
0.132902	0.82634		sp|Q2V3E2|YIPL5_ARATH Protein yippee-like At4g27740 OS=Arabidopsis thaliana OX=3702 GN=At4g27740 PE=3 SV=1	25.7395	25.1137	25.3611	25.3506	25.7621	25.8572	25.4412	25.6051		0.876467	-0.275192
0.132907	1.1006	GLN1-1	sp|Q56WN1|GLN11_ARATH Glutamine synthetase cytosolic isozyme 1-1 OS=Arabidopsis thaliana OX=3702 GN=GLN1-1 PE=1 SV=2	30.6272	30.7002	30.5649	30.7096	30.422	30.5256	30.3911	30.7101		0.876451	0.138296
0.132945	0.87949		sp|Q8RXN4|HIBC5_ARATH 3-hydroxyisobutyryl-CoA hydrolase-like protein 2, mitochondrial OS=Arabidopsis thaliana OX=3702 GN=At4g31810 PE=1 SV=1	27.2198	27.2018	27.1189	27.2828	27.4334	27.4814	27.0968	27.5528		0.876329	-0.185261
0.13309	1.21902	HPD	sp|P93836|HPPD_ARATH 4-hydroxyphenylpyruvate dioxygenase OS=Arabidopsis thaliana OX=3702 GN=HPD PE=1 SV=2	26.4526	26.5865	26.7998	26.0791	26.1927	26.3674	26.1554	26.0596		0.875855	0.28572
0.133368	0.506867		sp|Q9FZP1|HPSE3_ARATH Heparanase-like protein 3 OS=Arabidopsis thaliana OX=3702 GN=At5g34940 PE=2 SV=2	23.4848	25.1462	23.2069	25.2827	24.8453	25.5409	25.2059	25.4498		0.874948	-0.98032
0.133542	0.43212	ABCB28	sp|Q8LPQ6|AB28B_ARATH ABC transporter B family member 28 OS=Arabidopsis thaliana OX=3702 GN=ABCB28 PE=2 SV=1	26.2934	27.1424	24.3535	26.8915	26.8381	27.3159	28.2236	27.1452		0.874381	-1.21049
0.133547	0.881322	PLC2	sp|Q39033|PLCD2_ARATH Phosphoinositide phospholipase C 2 OS=Arabidopsis thaliana OX=3702 GN=PLC2 PE=1 SV=1	26.5559	26.8175	26.9069	26.7125	26.8747	26.939	27.1273	26.7809		0.874366	-0.182259
0.133755	1.74907	GLP1	sp|P92995|GLT1_ARATH Germin-like protein subfamily T member 1 OS=Arabidopsis thaliana OX=3702 GN=GLP1 PE=2 SV=2	26.8123	27.6723	27.5813	26.0136	26.4461	26.7505	26.1138	25.5427		0.873691	0.806586
0.133862	1.28124		sp|Q9SX28|GDT15_ARATH GDT1-like protein 5 OS=Arabidopsis thaliana OX=3702 GN=At1g68650 PE=1 SV=1	25.351	25.2603	25.2397	25.5171	24.9986	25.038	24.4723	25.4291		0.873341	0.357536
0.133978	1.35631	AHB1	sp|O24520|HBL1_ARATH Non-symbiotic hemoglobin 1 OS=Arabidopsis thaliana OX=3702 GN=AHB1 PE=1 SV=1	27.9827	27.8822	28.0362	27.3263	27.8344	27.3498	27.4004	26.884		0.872968	0.439683
0.134111	1.46013	At5g10770	sp|Q8S9J6|ASPA_ARATH Aspartyl protease family protein At5g10770 OS=Arabidopsis thaliana OX=3702 GN=At5g10770 PE=2 SV=1	27.2775	27.0797	26.6148	27.846	26.5838	26.8236	26.1791	27.0472		0.872535	0.546095
0.134358	1.18487	UGT89B1	sp|Q9C9B0|U89B1_ARATH Flavonol 3-O-glucosyltransferase UGT89B1 OS=Arabidopsis thaliana OX=3702 GN=UGT89B1 PE=1 SV=2	26.4963	26.3879	26.7905	26.2831	26.2093	26.2877	26.4571	26.0249		0.871737	0.244723
0.134548	0.913167	PHB3	sp|O04331|PHB3_ARATH Prohibitin-3, mitochondrial OS=Arabidopsis thaliana OX=3702 GN=PHB3 PE=1 SV=1	29.966	29.92	29.9686	29.9399	30.0418	30.2224	29.8857	30.1687		0.871122	-0.13105
0.135132	1.11126	TUBB7	sp|P29515|TBB7_ARATH Tubulin beta-7 chain OS=Arabidopsis thaliana OX=3702 GN=TUBB7 PE=2 SV=1	29.4775	29.3877	29.1703	29.378	29.2117	29.2464	29.0338	29.3128		0.869242	0.152194
0.135551	1.1242	CBR1	sp|Q9ZNT1|NB5R1_ARATH NADH--cytochrome b5 reductase 1 OS=Arabidopsis thaliana OX=3702 GN=CBR1 PE=1 SV=1	30.5307	30.5578	30.4024	30.6036	30.3619	30.3653	30.1308	30.5611		0.867898	0.1689
0.136029	1.18937	STR16	sp|Q39129|STR16_ARATH Thiosulfate sulfurtransferase 16, chloroplastic OS=Arabidopsis thaliana OX=3702 GN=STR16 PE=1 SV=2	27.6199	27.4654	27.5095	27.3964	27.5453	27.3448	27.2101	26.8902		0.866368	0.250199
0.136083	1.0593	GER1	sp|O49213|FCL1_ARATH GDP-L-fucose synthase 1 OS=Arabidopsis thaliana OX=3702 GN=GER1 PE=1 SV=3	26.176	26.322	26.2859	26.1711	26.0747	26.2007	26.197	26.15		0.866197	0.0831165
0.136895	2.53911		sp|Q9SF12|IRE1L_ARATH Inactive serine/threonine-protein kinase/endoribonuclease IRE1-like OS=Arabidopsis thaliana OX=3702 GN=At3g11870 PE=3 SV=1	27.1665	27.033	27.2106	27.1714	23.4575	26.6094	26.4719	26.6655		0.863612	1.34432
0.13697	1.28424	dl4135w	sp|Q9SUL1|RD19C_ARATH Probable cysteine protease RD19C OS=Arabidopsis thaliana OX=3702 GN=RD19C PE=2 SV=1	25.5727	25.668	26.2077	25.5594	25.4735	25.5178	25.6042	24.9686		0.863374	0.360913
0.137094	1.10964		sp|Q9LZX1|LOR15_ARATH Protein LURP-one-related 15 OS=Arabidopsis thaliana OX=3702 GN=At5g01750 PE=1 SV=1	27.5633	27.6111	27.8558	27.449	27.4688	27.5035	27.4852	27.4214		0.862981	0.150096
0.137149	0.682916	2002-04-01	sp|P92981|APR2_ARATH 5-adenylylsulfate reductase 2, chloroplastic OS=Arabidopsis thaliana OX=3702 GN=APR2 PE=1 SV=2	24.0129	24.7537	24.9345	23.6245	24.8453	24.832	25.1299	24.7194		0.862809	-0.55022
0.137353	1.13839	TPK1;TPK2	sp|B9DGU7|TPK1_ARATH Thiamine pyrophosphokinase 1 OS=Arabidopsis thaliana OX=3702 GN=TPK1 PE=2 SV=1;sp|F4IV16|TPK2_ARATH Thiamine pyrophosphokinase 2 OS=Arabidopsis thaliana OX=3702 GN=TPK2 PE=2 SV=1	26.5823	26.5224	26.6543	26.2785	26.3788	26.4929	26.2591	26.1588		0.862163	0.186996
0.137423	1.11247	METK3	sp|Q9SJL8|METK3_ARATH S-adenosylmethionine synthase 3 OS=Arabidopsis thaliana OX=3702 GN=METK3 PE=1 SV=1	32.726	32.6789	32.7288	32.9996	32.616	32.5814	32.5416	32.7793		0.861941	0.153771
0.137518	1.17453	ARD4	sp|Q8H185|MTND4_ARATH 1,2-dihydroxy-3-keto-5-methylthiopentene dioxygenase 4 OS=Arabidopsis thaliana OX=3702 GN=ARD4 PE=1 SV=1	24.9209	25.2877	24.9139	24.8241	24.842	24.9582	24.6411	24.577		0.861641	0.232088
0.137721	1.11479	ERD7	sp|O48832|ERD7_ARATH Protein EARLY-RESPONSIVE TO DEHYDRATION 7, chloroplastic OS=Arabidopsis thaliana OX=3702 GN=ERD7 PE=1 SV=1	26.8467	26.8879	27.0405	26.7497	26.8866	26.7584	26.6972	26.5555		0.860998	0.15677
0.137852	0.88286	LPD1	sp|A8MS68|PLPD1_ARATH Dihydrolipoyl dehydrogenase 1, chloroplastic OS=Arabidopsis thaliana OX=3702 GN=LPD1 PE=2 SV=1	28.0642	27.9623	27.767	28.0273	28.1054	28.0267	28.0339	28.3737		0.860585	-0.179743
0.138001	0.898782	NOP5-2	sp|Q9MAB3|NOP5B_ARATH Probable nucleolar protein 5-2 OS=Arabidopsis thaliana OX=3702 GN=NOP5-2 PE=1 SV=1	29.5387	29.4448	29.3804	29.4648	29.7557	29.639	29.3701	29.6797		0.860118	-0.153957
0.138034	1.08648	RPN5A	sp|Q9FIB6|PS12A_ARATH 26S proteasome non-ATPase regulatory subunit 12 homolog A OS=Arabidopsis thaliana OX=3702 GN=RPN5A PE=1 SV=1	28.8956	29.0025	28.9047	28.7994	28.8034	28.8557	28.6156	28.8489		0.860014	0.119658
0.138415	1.18859	MED37A	sp|Q9LKR3|BIP1_ARATH Heat shock 70 kDa protein BIP1 OS=Arabidopsis thaliana OX=3702 GN=BIP1 PE=1 SV=1	29.9073	30.2999	30.3196	30.0643	29.6488	29.8641	29.9101	30.171		0.858815	0.249253
0.138857	0.821979	CWINV1	sp|Q43866|INV1_ARATH Beta-fructofuranosidase, insoluble isoenzyme CWINV1 OS=Arabidopsis thaliana OX=3702 GN=CWINV1 PE=1 SV=1	29.28	29.198	29.1303	29.0151	29.5831	29.7289	29.0062	29.4365		0.857433	-0.282826
0.139206	0.911496	AATP2	sp|P92935|TLC2_ARATH ADP,ATP carrier protein 2, chloroplastic OS=Arabidopsis thaliana OX=3702 GN=AATP2 PE=1 SV=2	28.1676	28.0856	27.9631	27.9547	28.3112	28.2401	28.063	28.0915		0.856343	-0.133691
0.139228	2.87468	PDF2.3	sp|Q9ZUL7|DEF01_ARATH Defensin-like protein 1 OS=Arabidopsis thaliana OX=3702 GN=PDF2.3 PE=2 SV=1	26.9586	26.9737	26.5393	26.4435	24.8188	22.9237	27.0104	26.0686		0.856275	1.5234
0.139951	0.923605	RPS16C	sp|Q42340|RS163_ARATH 40S ribosomal protein S16-3 OS=Arabidopsis thaliana OX=3702 GN=RPS16C PE=2 SV=1	31.3713	31.413	31.2254	31.4296	31.5894	31.4858	31.3508	31.4719		0.854024	-0.114652
0.139987	1.11461	SYP51	sp|Q9SA23|SYP51_ARATH Syntaxin-51 OS=Arabidopsis thaliana OX=3702 GN=SYP51 PE=1 SV=1	25.4984	25.5323	25.3395	25.4972	25.3999	25.4183	25.0699	25.3531		0.853911	0.156533
0.140055	1.17742	RANBP1B	sp|Q8RWG8|RBP1B_ARATH Ran-binding protein 1 homolog b OS=Arabidopsis thaliana OX=3702 GN=RANBP1B PE=1 SV=2	28.2802	28.5619	28.3008	28.425	28.2906	28.1173	27.8297	28.3878		0.8537	0.235632
0.140586	0.874148	AGT2	sp|Q940M2|AGT21_ARATH Alanine--glyoxylate aminotransferase 2 homolog 1, mitochondrial OS=Arabidopsis thaliana OX=3702 GN=AGT2 PE=1 SV=1	27.4805	27.4724	27.5322	27.6861	27.4908	27.6754	27.8016	27.9795		0.852057	-0.194051
0.140726	0.557577	DIR24;DIR9	sp|O80630|DIR9_ARATH Dirigent protein 9 OS=Arabidopsis thaliana OX=3702 GN=DIR9 PE=2 SV=1;sp|Q9M3C8|DIR24_ARATH Dirigent protein 24 OS=Arabidopsis thaliana OX=3702 GN=DIR24 PE=2 SV=1	23.5736	23.6149	23.4334	23.965	25.2249	25.205	23.1712	24.3569		0.851626	-0.842758
0.140992	0.670114	CLPS3	sp|Q9SR06|CLP1_ARATH Protein CLP1 homolog OS=Arabidopsis thaliana OX=3702 GN=CLPS3 PE=1 SV=1	25.5814	24.5615	24.4529	25.7426	25.7583	25.7168	25.4948	25.6784		0.850805	-0.577522
0.141042	0.918385	RPL17A;RPL17B	sp|P51413|RL172_ARATH 60S ribosomal protein L17-2 OS=Arabidopsis thaliana OX=3702 GN=RPL17B PE=2 SV=2;sp|Q93VI3|RL171_ARATH 60S ribosomal protein L17-1 OS=Arabidopsis thaliana OX=3702 GN=RPL17A PE=2 SV=1	31.9147	31.8957	31.833	32.0983	32.14	31.936	32.0506	32.1064		0.85065	-0.122829
0.141047	1.14107	SAM1	sp|P23686|METK1_ARATH S-adenosylmethionine synthase 1 OS=Arabidopsis thaliana OX=3702 GN=SAM1 PE=1 SV=2	31.9344	31.7215	31.7729	32.0205	31.576	31.4857	31.7434	31.8826		0.850637	0.190392
0.141278	1.0771	UPL2	sp|Q8H0T4|UPL2_ARATH E3 ubiquitin-protein ligase UPL2 OS=Arabidopsis thaliana OX=3702 GN=UPL2 PE=1 SV=3	26.6986	26.7244	26.6737	26.519	26.5795	26.6224	26.4226	26.5626		0.849924	0.107156
0.142219	0.902951	At4g12130	sp|Q8L733|Y4121_ARATH Putative transferase At4g12130, mitochondrial OS=Arabidopsis thaliana OX=3702 GN=At4g12130 PE=1 SV=1	25.9009	26.0862	26.0315	25.8014	25.9426	26.227	26.1245	26.1151		0.847043	-0.147281
0.14222	0.679763	RPL34A	sp|Q42351|RL341_ARATH 60S ribosomal protein L34-1 OS=Arabidopsis thaliana OX=3702 GN=RPL34A PE=2 SV=1	27.1279	26.8836	25.8197	27.136	27.5013	27.451	27.084	27.1586		0.847038	-0.556895
0.142986	0.915341		sp|Q9ZP06|MDHM1_ARATH Malate dehydrogenase 1, mitochondrial OS=Arabidopsis thaliana OX=3702 GN=At1g53240 PE=1 SV=1	32.4358	32.5575	32.5068	32.4399	32.4536	32.6329	32.79	32.5739		0.844706	-0.127619
0.143144	3.60537	BCA3	sp|Q9ZUC2|BCA3_ARATH Beta carbonic anhydrase 3 OS=Arabidopsis thaliana OX=3702 GN=BCA3 PE=2 SV=1	27.6998	26.9317	26.0412	28.9156	25.1133	24.982	23.922	28.1704		0.844226	1.85015
0.143269	1.2502	At1g04280	sp|Q0WUY1|NADKC_ARATH Calmodulin calcium-dependent NAD kinase OS=Arabidopsis thaliana OX=3702 GN=NADKC PE=1 SV=1	26.5647	26.5838	26.4633	26.1831	26.4381	26.3405	26.0315	25.6962		0.843847	0.322164
0.14333	1.12268	EMB2731	sp|Q9FG71|EMC89_ARATH ER membrane protein complex subunit 8/9 homolog OS=Arabidopsis thaliana OX=3702 GN=EMB2731 PE=2 SV=1	27.5269	27.6228	27.4473	27.6065	27.3311	27.3783	27.1965	27.6299		0.843661	0.166941
0.143424	0.924632	MSD1	sp|O81235|SODM1_ARATH Superoxide dismutase [Mn] 1, mitochondrial OS=Arabidopsis thaliana OX=3702 GN=MSD1 PE=1 SV=2	30.2434	30.2949	30.353	30.1403	30.3133	30.2898	30.5116	30.3691		0.843379	-0.113049
0.143496	0.604204	PATL2	sp|Q56ZI2|PATL2_ARATH Patellin-2 OS=Arabidopsis thaliana OX=3702 GN=PATL2 PE=1 SV=2	27.3504	27.1605	26.3589	28.1659	27.8969	28.0449	27.4633	28.5382		0.843159	-0.726893
0.143803	1.0969	At4g26870	sp|Q8H104|SYDC1_ARATH Aspartate--tRNA ligase 1, cytoplasmic OS=Arabidopsis thaliana OX=3702 GN=At4g26870 PE=2 SV=1	26.4252	26.547	26.3232	26.2996	26.3297	26.2451	26.117	26.3695		0.842232	0.133436
0.143806	1.17591	CAD1	sp|Q9CAI3|CADH1_ARATH Probable cinnamyl alcohol dehydrogenase 1 OS=Arabidopsis thaliana OX=3702 GN=CAD1 PE=2 SV=1	28.6851	28.8291	29.0586	28.4276	28.5502	28.5752	28.5524	28.3875		0.842222	0.233783
0.144528	0.853059	RH9	sp|Q9LUW6|RH9_ARATH DEAD-box ATP-dependent RNA helicase 9, mitochondrial OS=Arabidopsis thaliana OX=3702 GN=RH9 PE=1 SV=1	26.1535	26.1444	25.921	26.1538	26.2955	25.9901	26.4351	26.5691		0.840048	-0.229283
0.144536	1.11797	MXE10.5	sp|Q9FKI4|NAA10_ARATH N-terminal acetyltransferase A complex catalytic subunit NAA10 OS=Arabidopsis thaliana OX=3702 GN=NAA10 PE=1 SV=1	27.3377	27.329	27.3119	27.2679	27.109	27.2502	26.9048	27.3389		0.840023	0.160881
0.144588	1.70475	CAF1-7	sp|Q9SKZ2|CAF1G_ARATH Probable CCR4-associated factor 1 homolog 7 OS=Arabidopsis thaliana OX=3702 GN=CAF1-7 PE=2 SV=2	25.1273	25.1627	25.2762	25.444	25.5237	23.7158	24.9616	23.7309		0.839867	0.769563
0.145092	0.932309	FOLD4	sp|O65271|FOLD4_ARATH Bifunctional protein FolD 4, chloroplastic OS=Arabidopsis thaliana OX=3702 GN=FOLD4 PE=1 SV=1	27.3912	27.5042	27.3557	27.4812	27.5116	27.5853	27.4079	27.6321		0.838356	-0.10112
0.145127	0.944966	ASP1	sp|P46643|AAT1_ARATH Aspartate aminotransferase, mitochondrial OS=Arabidopsis thaliana OX=3702 GN=ASP1 PE=1 SV=1	30.4424	30.4574	30.4781	30.3267	30.5137	30.5382	30.5706	30.4087		0.838251	-0.0816655
0.145262	0.29352	FTSH5;FTSH1	sp|Q39102|FTSH1_ARATH ATP-dependent zinc metalloprotease FTSH 1, chloroplastic OS=Arabidopsis thaliana OX=3702 GN=FTSH1 PE=1 S;sp|Q9FH02|FTSH5_ARATH ATP-dependent zinc metalloprotease FTSH 5, chloroplastic OS=Arabidopsis thaliana OX=3702 GN=FTSH5 PE=1 SV=1	23.614	23.7476	23.1086	23.1364	24.5479	23.3519	28.1805	24.6001		0.837848	-1.76847
0.145297	0.755213	TOM7-1	sp|Q9ASY8|TOM71_ARATH Mitochondrial import receptor subunit TOM7-1 OS=Arabidopsis thaliana OX=3702 GN=TOM7-1 PE=1 SV=1	25.9343	25.6684	26.2129	26.218	26.4536	25.9901	26.9529	26.2572		0.837742	-0.405045
0.145472	0.671156	GATB	sp|Q9FV81|GATB_ARATH Glutamyl-tRNA(Gln) amidotransferase subunit B, chloroplastic/mitochondrial OS=Arabidopsis thaliana OX=3702 GN=GATB PE=2 SV=1	23.9089	24.7467	24.9224	25.1237	25.0838	24.7973	25.8249	25.2968		0.83722	-0.57528
0.145883	1.13994	GLN1-3	sp|Q9LVI8|GLN13_ARATH Glutamine synthetase cytosolic isozyme 1-3 OS=Arabidopsis thaliana OX=3702 GN=GLN1-3 PE=1 SV=1	31.4384	31.4567	31.4441	31.596	31.1878	31.1023	31.2977	31.5916		0.835995	0.188959
0.145987	0.909871	ABCF4	sp|Q9M1H3|AB4F_ARATH ABC transporter F family member 4 OS=Arabidopsis thaliana OX=3702 GN=ABCF4 PE=2 SV=1	26.5922	26.4299	26.3316	26.6039	26.5772	26.723	26.5153	26.6871		0.835686	-0.136266
0.146013	1.17406		sp|Q9M330|PSMF1_ARATH Probable proteasome inhibitor OS=Arabidopsis thaliana OX=3702 GN=At3g53970 PE=1 SV=1	26.7429	26.964	26.6869	26.5613	26.7424	26.6436	26.3595	26.2836		0.835608	0.231503
0.14607	1.13334	PP2AB1	sp|Q38821|2ABA_ARATH Serine/threonine protein phosphatase 2A 55 kDa regulatory subunit B alpha isoform OS=Arabidopsis thaliana OX=3702 GN=PP2AB1 PE=1 SV=2	26.1212	26.1169	26.2654	26.4126	25.8087	26.0745	26.1457	26.1649		0.835438	0.180584
0.146358	0.90163	CEL1	sp|Q9CAC1|GUN8_ARATH Endoglucanase 8 OS=Arabidopsis thaliana OX=3702 GN=CEL1 PE=2 SV=1	24.9424	24.8465	24.7519	24.6884	25.099	25.0375	24.9067	24.7835		0.834584	-0.149393
0.147135	1.13259		sp|P57751|UGPA1_ARATH UTP--glucose-1-phosphate uridylyltransferase 1 OS=Arabidopsis thaliana OX=3702 GN=UGP1 PE=2 SV=1	27.0513	27.0756	26.658	27.0112	26.7112	26.7187	26.7437	26.904		0.832283	0.179621
0.147175	1.09359	ALDH2B4	sp|Q9SU63|AL2B4_ARATH Aldehyde dehydrogenase family 2 member B4, mitochondrial OS=Arabidopsis thaliana OX=3702 GN=ALDH2B4 PE=1 SV=1	29.425	29.4887	29.5854	29.2762	29.3909	29.3756	29.2835	29.2089		0.832165	0.129076
0.147927	1.08943	LIP5	sp|Q9SZ15|LIP5_ARATH Protein HOMOLOG OF MAMMALIAN LYST-INTERACTING PROTEIN 5 OS=Arabidopsis thaliana OX=3702 GN=LIP5 PE=1 SV=1	25.917	25.9394	25.8199	25.7701	25.8353	25.8533	25.6007	25.6629		0.829954	0.12358
0.148009	0.880276	HIPL1	sp|Q9SSG3|HIPL1_ARATH HIPL1 protein OS=Arabidopsis thaliana OX=3702 GN=HIPL1 PE=3 SV=2	27.0885	26.9428	27.3661	26.922	27.3535	27.3034	27.1561	27.2422		0.829712	-0.183973
0.148016	0.89395	NUCL1	sp|Q9FVQ1|NUCL1_ARATH Nucleolin 1 OS=Arabidopsis thaliana OX=3702 GN=NUCL1 PE=1 SV=1	29.3136	29.2511	29.3746	29.2013	29.5776	29.193	29.5708	29.4461		0.829692	-0.161735
0.148177	0.900252	NUP1	sp|Q9CAF4|NUP1_ARATH Nuclear pore complex protein NUP1 OS=Arabidopsis thaliana OX=3702 GN=NUP1 PE=1 SV=1	26.6103	26.426	26.526	26.5605	26.8902	26.4969	26.6255	26.7166		0.829219	-0.1516
0.14832	0.404831		sp|Q9FEA2|SYEM_ARATH Glutamate--tRNA ligase, chloroplastic/mitochondrial OS=Arabidopsis thaliana OX=3702 GN=OVA3 PE=1 SV=1	25.7123	24.1168	25.3907	22.4425	25.4921	25.3908	26.4969	25.5009		0.828801	-1.30461
0.148335	0.349097	RPS16B	sp|Q9M8X9|RS162_ARATH 40S ribosomal protein S16-2 OS=Arabidopsis thaliana OX=3702 GN=RPS16B PE=1 SV=1	23.3703	27.2331	26.6287	24.4401	27.0243	27.1622	26.6346	26.9241		0.828756	-1.5183
0.148435	1.2737	JAL33	sp|O04311|JAL33_ARATH Jacalin-related lectin 33 OS=Arabidopsis thaliana OX=3702 GN=JAL33 PE=1 SV=1	30.5261	30.4408	30.4335	29.8411	30.1962	29.7949	30.1989	29.6552		0.828465	0.349029
0.149393	1.2019		sp|Q9SZE1|3HID1_ARATH Probable 3-hydroxyisobutyrate dehydrogenase-like 1, mitochondrial OS=Arabidopsis thaliana OX=3702 GN=At4g29120 PE=1 SV=1	27.6876	27.4597	27.3925	27.4735	26.9895	27.2755	27.048	27.639		0.825671	0.26532
0.149448	1.12941		sp|Q93Y22|COPD_ARATH Coatomer subunit delta OS=Arabidopsis thaliana OX=3702 GN=At5g05010 PE=1 SV=2	29.1365	29.1424	28.987	29.2632	28.9671	29.0191	28.7077	29.1329		0.825511	0.175575
0.149454	1.23227	COR47	sp|P31168|COR47_ARATH Dehydrin COR47 OS=Arabidopsis thaliana OX=3702 GN=COR47 PE=1 SV=2	31.0859	30.8884	31.0158	31.304	30.6983	30.3536	31.0731	30.9639		0.825492	0.30132
0.149848	0.959337	ALS	sp|P17597|ILVB_ARATH Acetolactate synthase, chloroplastic OS=Arabidopsis thaliana OX=3702 GN=ALS PE=1 SV=1	27.4408	27.4037	27.3956	27.4116	27.4593	27.4428	27.5739	27.4151		0.82435	-0.0598907
0.149982	0.163927	NTF2A	sp|Q9FZK4|NTF2A_ARATH Nuclear transport factor 2A OS=Arabidopsis thaliana OX=3702 GN=NTF2A PE=1 SV=1	24.5009	23.1442	29.199	29.2162	29.0146	29.3208	28.9899	29.1705		0.823961	-2.60887
0.150959	1.09985	METK4	sp|Q9LUT2|METK4_ARATH S-adenosylmethionine synthase 4 OS=Arabidopsis thaliana OX=3702 GN=METK4 PE=1 SV=1	31.4277	31.3662	31.2457	31.502	31.2186	31.2213	31.1261	31.4264		0.821141	0.137305
0.151035	0.479267	BGAL10	sp|Q9FN08|BGA10_ARATH Beta-galactosidase 10 OS=Arabidopsis thaliana OX=3702 GN=BGAL10 PE=2 SV=1	25.384	22.9572	24.9142	25.7747	25.5811	25.6704	25.7411	26.2819		0.820922	-1.0611
0.151386	0.807623	CPN60B2	sp|Q9LJE4|CPNB2_ARATH Chaperonin 60 subunit beta 2, chloroplastic OS=Arabidopsis thaliana OX=3702 GN=CPN60B2 PE=1 SV=1	27.2436	27.323	26.7695	27.4414	27.2825	27.3273	27.6545	27.7462		0.819913	-0.308246
0.151741	1.14591	PVA41	sp|Q1ECE0|VAP41_ARATH Vesicle-associated protein 4-1 OS=Arabidopsis thaliana OX=3702 GN=PVA41 PE=2 SV=1	24.1236	24.4022	24.088	24.5575	24.0716	24.2053	24.0947	24.0138		0.818898	0.196497
0.151768	0.842489	AHA11;AHA4	sp|Q9LV11|PMA11_ARATH ATPase 11, plasma membrane-type OS=Arabidopsis thaliana OX=3702 GN=AHA11 PE=1 SV=1;sp|Q9SU58|PMA4_ARATH ATPase 4, plasma membrane-type OS=Arabidopsis thaliana OX=3702 GN=AHA4 PE=2 SV=2	28.3229	28.1268	28.4054	28.4929	28.3254	28.4847	28.9333	28.5937		0.81882	-0.24727
0.15197	0.749758	RH29	sp|O49289|RH29_ARATH Putative DEAD-box ATP-dependent RNA helicase 29 OS=Arabidopsis thaliana OX=3702 GN=RH29 PE=3 SV=1	23.7478	24.753	24.3604	23.7485	24.5049	24.4889	24.5426	24.7354		0.818241	-0.415504
0.152197	0.833133	MCCB	sp|Q9LDD8|MCCB_ARATH Methylcrotonoyl-CoA carboxylase beta chain, mitochondrial OS=Arabidopsis thaliana OX=3702 GN=MCCB PE=2 SV=1	25.5948	25.7661	25.6136	25.5396	25.9597	25.868	26.241	25.4989		0.817594	-0.263381
0.152236	1.1064	SRP-54C	sp|P49967|SR543_ARATH Signal recognition particle 54 kDa protein 3 OS=Arabidopsis thaliana OX=3702 GN=SRP-54C PE=2 SV=2	28.3707	28.2555	28.225	28.1564	28.12	28.1857	27.8858	28.2326		0.817482	0.145878
0.152456	0.850487		sp|O23676|MGN_ARATH Protein mago nashi homolog OS=Arabidopsis thaliana OX=3702 GN=MAGO PE=1 SV=1	26.2948	26.0358	26.1727	26.3842	26.3637	26.1607	26.5978	26.6999		0.816856	-0.233639
0.152499	0.48593	LSM3A	sp|Q9LMN4|LSM3A_ARATH Sm-like protein LSM3A OS=Arabidopsis thaliana OX=3702 GN=LSM3A PE=1 SV=1	25.0273	25.2441	22.5317	24.1173	25.1387	25.3804	24.9248	25.6412		0.816734	-1.04118
0.152504	1.06054	HSP70-14	sp|Q9S7C0|HSP7O_ARATH Heat shock 70 kDa protein 14 OS=Arabidopsis thaliana OX=3702 GN=HSP70-14 PE=1 SV=1	29.3205	29.2733	29.2162	29.2639	29.1694	29.2125	29.0634	29.2894		0.816719	0.0847988
0.152521	0.9023	At1g02305	sp|Q93VC9|CATB2_ARATH Cathepsin B-like protease 2 OS=Arabidopsis thaliana OX=3702 GN=CATHB2 PE=2 SV=1	26.9791	26.9209	26.8826	27.1711	27.2135	27.1315	26.9584	27.2436		0.81667	-0.14832
0.152579	1.18942	At4g24840	sp|F4JRR1|COG2_ARATH Conserved oligomeric Golgi complex subunit 2 OS=Arabidopsis thaliana OX=3702 GN=COG2 PE=1 SV=1	24.9747	24.6738	24.8011	25.3132	24.5847	24.6429	24.6568	24.8775		0.816504	0.250262
0.152617	0.877623	AIR9	sp|F4IIU4|AIR9_ARATH 187-kDa microtubule-associated protein AIR9 OS=Arabidopsis thaliana OX=3702 GN=AIR9 PE=1 SV=1	24.7549	24.9491	24.5857	24.9225	24.7913	25.0296	24.975	25.1696		0.816397	-0.188327
0.152778	1.33825	dl3745c	sp|O23393|BIA1_ARATH BAHD acyltransferase BIA1 OS=Arabidopsis thaliana OX=3702 GN=BIA1 PE=2 SV=1	27.7075	27.862	27.8726	27.3213	27.6627	27.435	27.3502	26.6341		0.815939	0.420351
0.152837	1.24473		sp|Q9C5K7|ACCH2_ARATH 1-aminocyclopropane-1-carboxylate oxidase homolog 2 OS=Arabidopsis thaliana OX=3702 GN=At1g06640 PE=2 SV=1	25.5058	25.5179	25.5445	24.8847	25.3424	25.0726	24.9184	24.8562		0.81577	0.315832
0.152897	0.770277	BAS1	sp|Q96291|BAS1A_ARATH 2-Cys peroxiredoxin BAS1, chloroplastic OS=Arabidopsis thaliana OX=3702 GN=BAS1 PE=1 SV=2	28.1715	28.0415	28.2052	28.3366	28.1803	28.4243	29.2057	28.4505		0.815602	-0.37655
0.152966	1.1513	At4g30260	sp|Q93VH1|YIP4B_ARATH Protein YIP4b OS=Arabidopsis thaliana OX=3702 GN=YIP4B PE=1 SV=1	26.4878	26.8704	26.3533	26.4925	26.3502	26.2765	26.2612	26.5031		0.815405	0.203258
0.153083	0.913279		sp|Q93YZ7|ILVH2_ARATH Acetolactate synthase small subunit 2, chloroplastic OS=Arabidopsis thaliana OX=3702 GN=At2g31810 PE=1 SV=1	27.1667	27.0701	26.9281	26.854	27.1244	27.2021	27.0316	27.1843		0.815073	-0.130872
0.153618	1.4111	TON1B	sp|Q9FQ24|TON1B_ARATH Protein TONNEAU 1b OS=Arabidopsis thaliana OX=3702 GN=TON1B PE=1 SV=1	24.6909	24.9468	24.6993	25.8483	24.3769	24.4766	24.4022	24.9423		0.813557	0.496821
0.153786	0.512828	DGAT2	sp|Q9ASU1|DGAT2_ARATH Diacylglycerol O-acyltransferase 2 OS=Arabidopsis thaliana OX=3702 GN=DGAT2 PE=1 SV=1	25.3576	23.6471	23.6479	22.9048	25.2924	24.9519	25.1273	24.0396		0.813082	-0.963453
0.154025	1.11828	DEX1	sp|F4IYM4|DEX1_ARATH Protein DEFECTIVE IN EXINE FORMATION 1 OS=Arabidopsis thaliana OX=3702 GN=DEX1 PE=2 SV=1	25.8837	25.9467	25.8275	26.2184	25.874	25.758	25.6987	25.9005		0.812408	0.16128
0.154064	1.19218	C50	sp|Q8GUN6|DNJ50_ARATH Chaperone protein dnaJ 50 OS=Arabidopsis thaliana OX=3702 GN=C50 PE=2 SV=1	26.1323	25.7559	25.7832	25.889	25.7367	25.4518	25.401	25.9566		0.812298	0.253601
0.154078	0.467841		sp|Q8LG98|OTU1_ARATH OVARIAN TUMOR DOMAIN-containing deubiquitinating enzyme 1 OS=Arabidopsis thaliana OX=3702 GN=OTU1 PE=1 SV=2	26.2034	23.828	23.7918	26.0494	25.9731	26.2226	26.0822	25.9783		0.81226	-1.09591
0.154375	1.20758	PMP22	sp|Q9ZS51|PMP22_ARATH Peroxisomal membrane protein PMP22 OS=Arabidopsis thaliana OX=3702 GN=PMP22 PE=1 SV=1	27.6001	27.5808	27.4518	27.0693	27.3307	27.3493	26.8859	27.0476		0.811422	0.272123
0.154781	2.69814	CB5LP	sp|O22704|CYP5F_ARATH Cytochrome B5-like protein OS=Arabidopsis thaliana OX=3702 GN=CB5LP PE=2 SV=1	26.7264	26.5818	26.5108	26.7183	25.6419	26.2241	22.6072	26.3362		0.810281	1.43197
0.15492	0.725358	ACP1	sp|P11829|ACP1_ARATH Acyl carrier protein 1, chloroplastic OS=Arabidopsis thaliana OX=3702 GN=ACP1 PE=1 SV=1	29.8622	29.7995	29.7506	30.3237	30.0013	30.7227	29.9328	30.932		0.809894	-0.463234
0.155033	0.283217	GER3	sp|P94072|GL33_ARATH Germin-like protein subfamily 3 member 3 OS=Arabidopsis thaliana OX=3702 GN=GER3 PE=1 SV=1	24.1288	24.3126	24.5117	24.1043	24.787	25.9563	29.2677	24.3265		0.809576	-1.82002
0.155367	1.15257	TNEA_C	sp|F4KFT7|TENAC_ARATH Bifunctional TH2 protein, mitochondrial OS=Arabidopsis thaliana OX=3702 GN=TH2 PE=1 SV=1	25.6531	25.9413	25.5383	25.7514	25.5749	25.5522	25.2519	25.6857		0.808641	0.204855
0.155705	0.643012	At4g33760	sp|F4JJT9|SYDM_ARATH Aspartate--tRNA ligase, chloroplastic/mitochondrial OS=Arabidopsis thaliana OX=3702 GN=At4g33760 PE=2 SV=1	24.6965	24.8226	23.5665	25.0269	25.2111	25.6191	24.5782	25.2525		0.807697	-0.637083
0.155972	0.897213	FAP1	sp|Q9M1X2|FAP1_ARATH Fatty-acid-binding protein 1 OS=Arabidopsis thaliana OX=3702 GN=FAP1 PE=1 SV=1	25.5138	25.2846	25.3479	25.5958	25.6171	25.7283	25.4186	25.604		0.806954	-0.156477
0.156057	0.843913	DUT	sp|Q9STG6|DUT_ARATH Deoxyuridine 5-triphosphate nucleotidohydrolase OS=Arabidopsis thaliana OX=3702 GN=DUT PE=1 SV=1	27.1192	27.2465	26.8925	27.401	27.4252	27.4737	27.1174	27.6223		0.806717	-0.244834
0.156558	0.146197	LHCA1	sp|Q01667|CAB6_ARATH Chlorophyll a-b binding protein 6, chloroplastic OS=Arabidopsis thaliana OX=3702 GN=LHCA1 PE=1 SV=1	22.8728	22.7635	20.7152	20.666	22.4538	22.6786	29.2534	23.7278		0.805325	-2.77401
0.156571	0.921562	NIFU4	sp|Q9LIG6|NIFU4_ARATH NifU-like protein 4, mitochondrial OS=Arabidopsis thaliana OX=3702 GN=NIFU4 PE=2 SV=1	26.7283	26.598	26.8447	26.792	26.9926	26.8305	26.7543	26.8571		0.80529	-0.117846
0.15676	1.48387	PER49	sp|O23237|PER49_ARATH Peroxidase 49 OS=Arabidopsis thaliana OX=3702 GN=PER49 PE=2 SV=2	28.9026	29.0973	29.0492	28.1974	28.5618	28.7517	28.1861	27.4694		0.804766	0.569364
0.157146	0.748356	VTE3	sp|Q9LY74|BQMT_ARATH 2-methyl-6-phytyl-1,4-hydroquinone methyltransferase, chloroplastic OS=Arabidopsis thaliana OX=3702 GN=VTE3 PE=1 SV=1	25.6701	25.7258	25.4196	25.6625	25.6556	25.9033	26.7704	25.8215		0.803697	-0.418203
0.157183	0.793186	GRXS14	sp|Q84Y95|GRS14_ARATH Monothiol glutaredoxin-S14, chloroplastic OS=Arabidopsis thaliana OX=3702 GN=GRXS14 PE=1 SV=2	25.3063	25.5722	25.964	25.8793	25.7219	26.1491	26.3443	25.8436		0.803595	-0.33427
0.157628	0.671686	RPS13	sp|Q9CA19|RT13_ARATH Small ribosomal subunit protein S13, mitochondrial OS=Arabidopsis thaliana OX=3702 GN=RPS13 PE=1 SV=1	25.7321	25.9839	25.7961	25.7872	26.5191	25.4055	27.0585	26.6127		0.802367	-0.57414
0.157754	1.53024	EXLA1	sp|Q9LZT4|EXLA1_ARATH Expansin-like A1 OS=Arabidopsis thaliana OX=3702 GN=EXLA1 PE=2 SV=1	26.5774	26.2351	26.2329	25.9821	26.1037	26.1087	24.5888	25.7713		0.802019	0.613756
0.157846	0.546587	COI1	sp|O04197|COI1_ARATH Coronatine-insensitive protein 1 OS=Arabidopsis thaliana OX=3702 GN=COI1 PE=1 SV=1	23.715	24.8466	22.487	24.528	24.8135	25.0824	24.5052	24.6613		0.801767	-0.871477
0.158365	1.07344		sp|Q9SV68|QORH_ARATH Chloroplast envelope quinone oxidoreductase homolog OS=Arabidopsis thaliana OX=3702 GN=CEQORH PE=1 SV=1	27.0646	27.1649	27.2446	27.0315	26.9783	27.1017	27.084	26.9327		0.800341	0.102245
0.158596	1.08284	HAG2	sp|Q9FJT8|HATB_ARATH Histone acetyltransferase type B catalytic subunit OS=Arabidopsis thaliana OX=3702 GN=HAG2 PE=2 SV=1	26.3984	26.6022	26.4089	26.5008	26.3886	26.2986	26.2624	26.5012		0.799707	0.114825
0.158655	1.10553	UPF1	sp|Q9FJR0|RENT1_ARATH Regulator of nonsense transcripts 1 homolog OS=Arabidopsis thaliana OX=3702 GN=UPF1 PE=1 SV=2	26.2316	26.3506	26.0556	26.2065	26.1391	26.1802	25.88	26.0661		0.799547	0.144733
0.15871	0.553526	SCPL11	sp|Q2V465|SCP11_ARATH Serine carboxypeptidase-like 11 OS=Arabidopsis thaliana OX=3702 GN=SCPL11 PE=2 SV=2	24.5284	26.6217	26.3241	26.7475	27.0956	27.1341	26.7046	26.7005		0.799395	-0.853277
0.159169	0.832583	CSP2	sp|Q41188|CSP2_ARATH Cold shock protein 2 OS=Arabidopsis thaliana OX=3702 GN=CSP2 PE=1 SV=1	31.0796	31.0833	30.7082	31.2147	31.1521	31.5137	31.0066	31.4709		0.798142	-0.264335
0.159219	1.22271	TPS27;TPS23	sp|P0DI76|CIN1_ARATH 1,8-cineole synthase 1, chloroplastic OS=Arabidopsis thaliana OX=3702 GN=TPS27 PE=1 SV=1;sp|P0DI77|CIN2_ARATH 1,8-cineole synthase 2, chloroplastic OS=Arabidopsis thaliana OX=3702 GN=TPS23 PE=1 SV=1	26.8747	27.019	27.1567	26.603	26.9315	26.349	26.7677	26.4449		0.798005	0.290087
0.159281	0.89321	GAUT6	sp|Q9M9Y5|GAUT6_ARATH Probable galacturonosyltransferase 6 OS=Arabidopsis thaliana OX=3702 GN=GAUT6 PE=2 SV=1	23.0359	23.5011	23.2845	23.3284	23.5439	23.3913	23.4315	23.4349		0.797836	-0.162929
0.159768	0.860398		sp|Q94K73|SYFM_ARATH Phenylalanine--tRNA ligase, chloroplastic/mitochondrial OS=Arabidopsis thaliana OX=3702 GN=At3g58140 PE=1 SV=1	26.0984	25.8853	25.5735	25.9427	25.9167	26.005	26.1975	26.2483		0.796511	-0.216923
0.160036	3.25188		sp|Q8LAD2|SUCA2_ARATH Succinate--CoA ligase [ADP-forming] subunit alpha-2, mitochondrial OS=Arabidopsis thaliana OX=3702 GN=At5g23250 PE=1 SV=2	26.9617	23.5932	26.7429	27.021	26.3457	23.9343	23.5883	23.6455		0.795781	1.70127
0.160397	0.735315	PME2	sp|Q42534|PME2_ARATH Pectinesterase 2 OS=Arabidopsis thaliana OX=3702 GN=PME2 PE=2 SV=2	26.775	26.6716	26.5512	27.1316	27.5189	27.5383	26.4954	27.3511		0.794804	-0.443566
0.160765	0.860289	PTI11	sp|Q8H1G6|PTI11_ARATH PTI1-like tyrosine-protein kinase 1 OS=Arabidopsis thaliana OX=3702 GN=PTI11 PE=1 SV=1	24.9962	24.8038	24.9225	24.7441	25.0229	25.2607	24.7608	25.2907		0.793809	-0.217106
0.160922	1.20127		sp|A0A1P8AS03|ECT4_ARATH YTH domain-containing protein ECT4 OS=Arabidopsis thaliana OX=3702 GN=ECT4 PE=2 SV=1	24.5872	24.934	25.2206	24.9449	24.6553	24.3679	24.7859	24.8193		0.793385	0.264559
0.161181	0.88455	GLDP2	sp|O80988|GCSP2_ARATH Glycine dehydrogenase (decarboxylating) 2, mitochondrial OS=Arabidopsis thaliana OX=3702 GN=GLDP2 PE=1 SV=1	28.9944	28.9909	28.8152	29.1415	28.9905	29.0448	29.3721	29.2426		0.792685	-0.176984
0.161262	0.907122		sp|Q94JX9|NACA2_ARATH Nascent polypeptide-associated complex subunit alpha-like protein 2 OS=Arabidopsis thaliana OX=3702 GN=At3g49470 PE=2 SV=2	25.9855	26.0016	26.0415	26.2069	26.1502	26.0559	26.3971	26.1949		0.792468	-0.140631
0.161293	0.780584	PIP1-1	sp|P61837|PIP11_ARATH Aquaporin PIP1-1 OS=Arabidopsis thaliana OX=3702 GN=PIP1-1 PE=1 SV=1	28.6911	28.6266	28.3135	29.1168	28.9797	28.8977	28.8147	29.4852		0.792383	-0.357375
0.161467	0.93514	ALPHAC-AD	sp|Q8LPK4|AP2A2_ARATH AP-2 complex subunit alpha-2 OS=Arabidopsis thaliana OX=3702 GN=ALPHAC-AD PE=1 SV=1	26.4805	26.5482	26.4387	26.5328	26.6547	26.6364	26.4322	26.6638		0.791916	-0.096746
0.161777	0.873653	NAT6	sp|Q27GI3|NAT6_ARATH Nucleobase-ascorbate transporter 6 OS=Arabidopsis thaliana OX=3702 GN=NAT6 PE=2 SV=2	25.9617	25.9943	25.7448	25.9226	26.2849	26.123	25.7899	26.205		0.791083	-0.194867
0.16189	0.956144		sp|Q93YR3|F10AL_ARATH FAM10 family protein At4g22670 OS=Arabidopsis thaliana OX=3702 GN=At4g22670 PE=1 SV=1	29.6274	29.6385	29.6415	29.7178	29.6331	29.7666	29.698	29.7863		0.79078	-0.0647001
0.162378	0.912987	INVA;INVH	sp|Q84JL5|INVH_ARATH Probable alkaline/neutral invertase A, chloroplastic OS=Arabidopsis thaliana OX=3702 GN=INVH PE=2 SV=1;sp|Q9FXA8|INVA_ARATH Alkaline/neutral invertase A, mitochondrial OS=Arabidopsis thaliana OX=3702 GN=INVA PE=1 SV=1	25.0401	24.8974	25.0992	24.9335	25.0408	25.0651	25.0625	25.3271		0.789472	-0.131333
0.16241	1.15342	PFK1	sp|Q9M0F9|PFKA1_ARATH ATP-dependent 6-phosphofructokinase 1 OS=Arabidopsis thaliana OX=3702 GN=PFK1 PE=1 SV=1	26.7657	26.7358	26.9834	26.4732	26.3335	26.603	26.689	26.5089		0.789386	0.20592
0.162433	0.816372	At1g29790	sp|Q8RWB7|PMT12_ARATH Probable methyltransferase At1g29790 OS=Arabidopsis thaliana OX=3702 GN=CLSC5 PE=2 SV=1	25.1035	25.417	24.8042	25.375	25.5501	25.3918	25.1888	25.7397		0.789327	-0.292701
0.163011	1.33838		sp|Q9LTH8|ACH11_ARATH 1-aminocyclopropane-1-carboxylate oxidase homolog 11 OS=Arabidopsis thaliana OX=3702 GN=At5g59530 PE=2 SV=1	25.5678	25.944	26.1636	25.4825	25.5271	25.3356	25.8059	24.8073		0.787782	0.420491
0.163176	0.959012	DTC	sp|Q9C5M0|DTC_ARATH Mitochondrial dicarboxylate/tricarboxylate transporter DTC OS=Arabidopsis thaliana OX=3702 GN=DTC PE=1 SV=1	30.2376	30.2614	30.1994	30.2712	30.3167	30.3507	30.2016	30.3421		0.787345	-0.0603786
0.163233	1.09758	HIT3	sp|Q8GUN2|HINT1_ARATH Adenylylsulfatase HINT1 OS=Arabidopsis thaliana OX=3702 GN=HINT1 PE=1 SV=1	29.9811	29.8684	30.1171	29.9628	29.9647	29.9531	29.687	29.7874		0.787192	0.134322
0.163312	0.510903	CP31A	sp|Q04836|CP31A_ARATH 31 kDa ribonucleoprotein, chloroplastic OS=Arabidopsis thaliana OX=3702 GN=CP31A PE=1 SV=1	26.5077	26.6818	26.6	26.7484	26.8473	27.0222	29.4185	27.1253		0.786981	-0.968879
0.16341	0.872781	CM1	sp|P42738|CM1_ARATH Chorismate mutase 1, chloroplastic OS=Arabidopsis thaliana OX=3702 GN=CM1 PE=1 SV=3	26.03	26.1712	26.2485	26.2075	26.5512	26.4249	26.0289	26.4374		0.786721	-0.196308
0.163539	1.07608	IMPDH	sp|P47996|IMDH1_ARATH Inosine-5-monophosphate dehydrogenase 1 OS=Arabidopsis thaliana OX=3702 GN=IMPDH PE=2 SV=1	27.2927	27.3751	27.1715	27.4049	27.1402	27.1939	27.1619	27.325		0.786379	0.105788
0.163659	0.785069	FLCY	sp|P57681|PCYOX_ARATH Farnesylcysteine lyase OS=Arabidopsis thaliana OX=3702 GN=FLCY PE=1 SV=1	25.3041	25.2518	25.5715	25.0516	25.123	25.8991	25.5875	25.9658		0.786061	-0.349109
0.163759	0.693801		sp|P93051|ERDL7_ARATH Sugar transporter ERD6-like 7 OS=Arabidopsis thaliana OX=3702 GN=At2g48020 PE=2 SV=2	23.2578	23.6199	24.4463	23.1701	23.6953	24.3303	24.1621	24.4159		0.785795	-0.527405
0.163777	0.935192	MORF8	sp|Q9LKA5|MORF8_ARATH Multiple organellar RNA editing factor 8, chloroplastic/mitochondrial OS=Arabidopsis thaliana OX=3702 GN=MORF8 PE=1 SV=1	28.3286	28.2423	28.2692	28.2756	28.4872	28.4555	28.2382	28.3215		0.785747	-0.0966659
0.163898	1.05603		sp|Q8LPJ5|ICDHP_ARATH Isocitrate dehydrogenase [NADP], chloroplastic/mitochondrial OS=Arabidopsis thaliana OX=3702 GN=At5g14590 PE=1 SV=1	27.9284	27.9733	27.976	27.8329	27.8353	27.9517	27.7778	27.8312		0.785425	0.0786505
0.16407	0.705842	GLDP1	sp|Q94B78|GCSP1_ARATH Glycine dehydrogenase (decarboxylating) 1, mitochondrial OS=Arabidopsis thaliana OX=3702 GN=GLDP1 PE=1 SV=2	28.2556	28.0996	28.1934	28.5136	28.2632	28.4315	29.6304	28.7475		0.784971	-0.502584
0.164219	0.886013	WPP2	sp|Q9C500|WPP2_ARATH WPP domain-containing protein 2 OS=Arabidopsis thaliana OX=3702 GN=WPP2 PE=1 SV=1	26.7512	26.98	26.5928	27.0697	27.0398	27.045	26.9639	27.0434		0.784576	-0.1746
0.164256	1.1577	TFCD	sp|Q8L5R3|TBCD_ARATH Tubulin-folding cofactor D OS=Arabidopsis thaliana OX=3702 GN=TFCD PE=2 SV=1	24.3385	24.7822	24.4364	24.5229	24.3406	24.3936	24.0386	24.4623		0.784478	0.211261
0.164261	0.772262	PER57	sp|Q43729|PER57_ARATH Peroxidase 57 OS=Arabidopsis thaliana OX=3702 GN=PER57 PE=1 SV=1	29.4278	29.2393	29.0595	29.7635	29.6778	29.9546	29.2655	30.0836		0.784465	-0.372838
0.164639	1.09234	SSL3	sp|Q8VWF6|SSL3_ARATH Protein STRICTOSIDINE SYNTHASE-LIKE 3 OS=Arabidopsis thaliana OX=3702 GN=SSL3 PE=2 SV=1	25.9949	25.826	26.1407	26.1284	25.9942	25.8535	25.8703	25.8624		0.783468	0.127417
0.164759	0.973893	T15B16.17a:T15B16.17b	sp|Q94K85|CATB3_ARATH Cathepsin B-like protease 3 OS=Arabidopsis thaliana OX=3702 GN=CATHB3 PE=1 SV=1	28.6614	28.5919	28.6014	28.64	28.6347	28.6305	28.6777	28.7045		0.783152	-0.0381651
0.164795	1.08373	MED37F	sp|Q39043|BIP2_ARATH Heat shock 70 kDa protein BIP2 OS=Arabidopsis thaliana OX=3702 GN=BIP2 PE=1 SV=2	31.4116	31.3244	31.3127	31.5197	31.2923	31.2551	31.1438	31.4132		0.783056	0.116004
0.165157	0.741631	PGMP	sp|Q9SCY0|PGMP_ARATH Phosphoglucomutase, chloroplastic OS=Arabidopsis thaliana OX=3702 GN=PGMP PE=1 SV=2	26.2072	26.0824	25.977	26.2541	26.226	26.3691	27.3535	26.297		0.782102	-0.431226
0.165796	1.17438		sp|Q8GZ29|GH315_ARATH Indole-3-acetic acid-amido synthetase GH3.15 OS=Arabidopsis thaliana OX=3702 GN=GH3.15 PE=1 SV=1	27.2915	27.321	27.5018	27.0037	26.9946	27.181	27.2399	26.7748		0.780426	0.231894
0.165995	0.815748	PVA13	sp|Q84WW5|VAP13_ARATH Vesicle-associated protein 1-3 OS=Arabidopsis thaliana OX=3702 GN=PVA13 PE=2 SV=1	24.7539	24.8692	25.0186	24.2975	25.0348	25.317	24.8849	24.8777		0.779906	-0.293804
0.166312	1.21095		sp|Q8W486|OFUT1_ARATH O-fucosyltransferase 1 OS=Arabidopsis thaliana OX=3702 GN=OFUT1 PE=2 SV=1	24.957	25.0363	24.8633	25.4495	24.5859	24.9815	24.606	25.0281		0.779077	0.276144
0.167094	0.633872	UPM1	sp|Q42606|UPM1_ARATH S-adenosyl-L-methionine-dependent uroporphyrinogen III methyltransferase, chloroplastic OS=Arabidopsis thaliana OX=3702 GN=UPM1 PE=1 SV=1	24.7961	23.1845	24.7379	24.6076	25.082	24.8566	25.3977	24.6208		0.77704	-0.657737
0.16717	0.429716	EFR	sp|C0LGT6|EFR_ARATH LRR receptor-like serine/threonine-protein kinase EFR OS=Arabidopsis thaliana OX=3702 GN=EFR PE=1 SV=1	23.1579	23.6985	25.4133	22.8933	25.4362	25.6778	25.4962	23.427		0.776843	-1.21854
0.16744	0.882944	ATO	sp|Q9FG01|ATO_ARATH Splicing factor SF3a60 homolog OS=Arabidopsis thaliana OX=3702 GN=ATO PE=1 SV=1	26.4618	26.2081	26.1897	26.4752	26.627	26.5641	26.2652	26.5969		0.776142	-0.179606
0.167793	0.62066	CBSX2	sp|Q9C5D0|CBSX2_ARATH CBS domain-containing protein CBSX2, chloroplastic OS=Arabidopsis thaliana OX=3702 GN=CBSX2 PE=1 SV=1	23.9365	23.8604	23.5043	23.7027	24.2868	24.541	25.5048	23.4239		0.775225	-0.688126
0.168039	0.44871	CRWN4	sp|Q9FLH0|CRWN4_ARATH Protein CROWDED NUCLEI 4 OS=Arabidopsis thaliana OX=3702 GN=CRWN4 PE=1 SV=2	24.0667	27.1026	26.3355	27.1575	27.4462	27.6237	27.2391	26.9778		0.774589	-1.15615
0.168729	1.11273	EIF4E1	sp|O23252|IF4E1_ARATH Eukaryotic translation initiation factor 4E-1 OS=Arabidopsis thaliana OX=3702 GN=EIF4E1 PE=1 SV=1	27.1486	26.9683	27.1772	27.2197	27.1114	26.795	26.8775	27.1135		0.772811	0.154107
0.168854	1.0754	emb1345	sp|O80990|CIA1_ARATH Protein CIA1 OS=Arabidopsis thaliana OX=3702 GN=CIA1 PE=1 SV=2	26.1718	26.1661	25.9905	26.1152	26.014	26.1353	25.8804	25.9944		0.772489	0.10487
0.169192	1.08002	UBC27	sp|Q9FI61|UBC27_ARATH Ubiquitin-conjugating enzyme E2 27 OS=Arabidopsis thaliana OX=3702 GN=UBC27 PE=2 SV=1	26.451	26.1281	26.2134	26.2525	26.1132	26.1508	26.1333	26.2034		0.771621	0.111052
0.169337	0.902395	PLP1	sp|O23179|PLP1_ARATH Patatin-like protein 1 OS=Arabidopsis thaliana OX=3702 GN=PLP1 PE=1 SV=2	27.0598	27.1856	27.2342	26.9116	27.1788	27.4196	27.244	27.1414		0.771249	-0.148169
0.169349	1.25819	RTNLB2	sp|Q9SUT9|RTNLB_ARATH Reticulon-like protein B2 OS=Arabidopsis thaliana OX=3702 GN=RTNLB2 PE=1 SV=1	29.2346	29.7056	29.4262	29.095	28.5745	29.0343	29.1805	29.3467		0.771217	0.331352
0.170218	0.850483	LRX4	sp|Q9LHF1|LRX4_ARATH Leucine-rich repeat extensin-like protein 4 OS=Arabidopsis thaliana OX=3702 GN=LRX4 PE=1 SV=1	26.2017	26.2246	26.0928	26.3962	26.6911	26.5432	26.067	26.5485		0.768996	-0.233646
0.170459	1.10588	SRK2D;SRK2I;SRK2E	sp|Q39192|SRK2D_ARATH Serine/threonine-protein kinase SRK2D OS=Arabidopsis thaliana OX=3702 GN=SRK2D PE=1 SV=1;sp|Q39193|SRK2I_ARATH Serine/threonine-protein kinase SRK2I OS=Arabidopsis thaliana OX=3702 GN=SRK2I PE=1 SV=1;sp|Q940H6|SRK2E_ARATH Serine/threo	26.0428	26.1144	26.2011	26.1964	25.8142	26.1403	25.8811	26.1383		0.768381	0.145189
0.170492	0.619161		sp|Q93YU6|TRM51_ARATH tRNA (guanine(37)-N1)-methyltransferase 1 OS=Arabidopsis thaliana OX=3702 GN=At3g56120 PE=2 SV=1	24.8641	25.5326	23.5142	25.0122	25.6029	25.3142	25.1615	25.6109		0.768295	-0.691615
0.17095	0.91715		sp|Q9ZUU3|PP190_ARATH Pentatricopeptide repeat-containing protein At2g37230 OS=Arabidopsis thaliana OX=3702 GN=At2g37230 PE=2 SV=1	27.8861	27.9475	27.8498	27.9247	27.9828	28.1015	27.833	28.1899		0.767132	-0.124771
0.171829	1.05566	SDH1-1	sp|O82663|SDHA1_ARATH Succinate dehydrogenase [ubiquinone] flavoprotein subunit 1, mitochondrial OS=Arabidopsis thaliana OX=3702 GN=SDH1-1 PE=1 SV=1	30.4315	30.4338	30.5578	30.344	30.3791	30.392	30.393	30.2904		0.764905	0.0781498
0.172393	0.844994	U2B	sp|O22922|RU2B1_ARATH U2 small nuclear ribonucleoprotein B OS=Arabidopsis thaliana OX=3702 GN=U2B PE=1 SV=1;sp|Q8H1S6|RU2B2_ARATH U2 small nuclear ribonucleoprotein B 2 OS=Arabidopsis thaliana OX=3702 GN=At1g06960 PE=1 SV=1	25.9728	26.1291	25.8696	26.1116	26.3918	26.3962	25.8316	26.4355		0.76348	-0.242987
0.172455	0.958149	SAL1	sp|Q42546|DPNP1_ARATH SAL1 phosphatase OS=Arabidopsis thaliana OX=3702 GN=SAL1 PE=1 SV=1	28.3138	28.3592	28.3239	28.4532	28.3955	28.4108	28.4955	28.3951		0.763324	-0.0616775
0.172852	0.906207	WHY2	sp|Q8VYF7|WHY2_ARATH Single-stranded DNA-binding protein WHY2, mitochondrial OS=Arabidopsis thaliana OX=3702 GN=WHY2 PE=1 SV=1	25.9247	26.1749	25.9241	25.8694	26.0626	26.2291	25.9677	26.2019		0.762327	-0.142087
0.173176	1.63235	MAG2	sp|Q9STU3|MAG2_ARATH RINT1-like protein MAG2 OS=Arabidopsis thaliana OX=3702 GN=MAG2 PE=1 SV=1	25.2873	25.2683	25.1883	25.3291	24.8067	25.2046	23.2138	25.0202		0.761513	0.706946
0.173346	1.13747	PRS3	sp|Q93Z66|KPRS3_ARATH Ribose-phosphate pyrophosphokinase 3, chloroplastic OS=Arabidopsis thaliana OX=3702 GN=PRS3 PE=2 SV=1	26.9482	27.0473	27.1362	26.884	26.7347	26.8116	26.6123	27.1138		0.761087	0.185828
0.173443	0.900973	HAT	sp|Q9M2N5|DSLE_ARATH Zinc finger BED domain-containing protein DAYSLEEPER OS=Arabidopsis thaliana OX=3702 GN=HAT PE=1 SV=1	26.5365	26.4476	26.4224	26.4719	26.5873	26.7543	26.3662	26.7723		0.760842	-0.150445
0.173533	1.1709	PCS1	sp|Q9S7Z3|PCS1_ARATH Glutathione gamma-glutamylcysteinyltransferase 1 OS=Arabidopsis thaliana OX=3702 GN=PCS1 PE=1 SV=1	26.3993	26.8066	26.7103	26.3531	26.3307	26.6039	26.2693	26.1549		0.760617	0.227619
0.174104	0.612772	LRX2	sp|O48809|LRX2_ARATH Leucine-rich repeat extensin-like protein 2 OS=Arabidopsis thaliana OX=3702 GN=LRX2 PE=1 SV=1	23.0326	23.7117	24.3614	24.51	23.8646	25.3205	24.4198	24.8371		0.759192	-0.706578
0.174376	1.12621		sp|Q9LN62|RRA3_ARATH Arabinosyltransferase RRA3 OS=Arabidopsis thaliana OX=3702 GN=RRA3 PE=2 SV=1	26.918	27.2278	26.9944	27.2897	26.9637	26.8363	26.8324	27.1117		0.758514	0.171477
0.174709	0.679148	At5g05600;F9F8.3	sp|Q9FFF6|DIOX5_ARATH Probable 2-oxoglutarate-dependent dioxygenase At5g05600 OS=Arabidopsis thaliana OX=3702 GN=At5g05600 PE=2 SV=1;sp|Q9SRM3|DIOX6_ARATH Probable 2-oxoglutarate-dependent dioxygenase At3g111800 OS=Arabidopsis thaliana OX=3702 GN=At3g11180	23.2433	24.5839	24.8554	24.5308	24.914	24.7558	24.9338	24.8425		0.757685	-0.558203
0.175315	0.872528	F9K20.12	sp|Q9ZVA2|EP1L2_ARATH EP1-like glycoprotein 2 OS=Arabidopsis thaliana OX=3702 GN=At1g78830 PE=1 SV=1	27.5181	27.422	27.5752	27.6549	27.454	27.6355	27.942	27.9255		0.756182	-0.196727
0.175463	1.09949	KAB1	sp|O23016|KCAB_ARATH Probable voltage-gated potassium channel subunit beta OS=Arabidopsis thaliana OX=3702 GN=KAB1 PE=1 SV=1	29.4702	29.6117	29.369	29.603	29.3312	29.4876	29.2055	29.4822		0.755814	0.136832
0.17554	1.21223	SDR1	sp|Q9M2E2|SDR1_ARATH (+)-neomenthol dehydrogenase OS=Arabidopsis thaliana OX=3702 GN=SDR1 PE=1 SV=1	27.6326	27.6763	27.721	27.1667	27.4097	27.4402	27.3403	26.8959		0.755624	0.277659
0.17598	0.939951	At5g12470	sp|Q94CJ5|RER4_ARATH Protein RETICULATA-RELATED 4, chloroplastic OS=Arabidopsis thaliana OX=3702 GN=RER4 PE=2 SV=1	27.7829	27.8753	27.7595	27.8358	27.9972	27.9769	27.7742	27.8627		0.754538	-0.0893426
0.176244	0.849205	RPS28C	sp|P34789|RS282_ARATH 40S ribosomal protein S28-2 OS=Arabidopsis thaliana OX=3702 GN=RPS28C PE=3 SV=1	29.8968	29.6368	29.4556	29.7001	29.6076	30.208	29.8615	29.9555		0.753886	-0.235815
0.177057	1.21905	ILR1	sp|P54968|ILR1_ARATH IAA-amino acid hydrolase ILR1 OS=Arabidopsis thaliana OX=3702 GN=ILR1 PE=1 SV=2	24.9308	25.224	25.6307	24.9577	24.6525	24.9767	25.0873	24.8837		0.751886	0.285752
0.177061	0.750585	GSA2	sp|Q42522|GSA2_ARATH Glutamate-1-semialdehyde 2,1-aminomutase 2, chloroplastic OS=Arabidopsis thaliana OX=3702 GN=GSA2 PE=1 SV=2	27.1531	27.116	26.971	26.9411	27.0994	27.3233	28.2434	27.1708		0.751877	-0.413913
0.177301	2.09276		sp|Q9ZVI3|QKIL3_ARATH KH domain-containing protein At2g38610 OS=Arabidopsis thaliana OX=3702 GN=At2g38610 PE=1 SV=1	25.3592	25.3613	25.4088	25.6285	23.3479	25.5812	23.0077	25.5595		0.75129	1.0654
0.177394	1.05751	T6H22.13	sp|Q9ASR1|EF2_ARATH Elongation factor 2 OS=Arabidopsis thaliana OX=3702 GN=LOS1 PE=1 SV=1	32.6759	32.6411	32.5408	32.6553	32.5334	32.4927	32.4898	32.6745		0.75106	0.0806761
0.177533	1.27844	DJ1B	sp|Q9MAH3|DJ1B_ARATH Protein DJ-1 homolog B OS=Arabidopsis thaliana OX=3702 GN=DJ1B PE=1 SV=1	27.6067	27.8348	27.6142	28.4157	27.2901	27.336	27.5548	27.873		0.750722	0.354384
0.177995	1.05946	VCS	sp|Q9LTT8|VCS_ARATH Enhancer of mRNA-decapping protein 4 OS=Arabidopsis thaliana OX=3702 GN=VCS PE=1 SV=1	28.0157	28.0455	27.9719	28.0158	28.0377	27.9576	27.7862	27.934		0.749592	0.0833354
0.178853	1.05606	At5g13430;T22N19_90	sp|Q94JS0|UCRI1_ARATH Cytochrome b-c1 complex subunit Rieske-1, mitochondrial OS=Arabidopsis thaliana OX=3702 GN=UCR1-1 PE=1 SV=1;sp|Q9LYR2|UCRI2_ARATH Cytochrome b-c1 complex subunit Rieske-2, mitochondrial OS=Arabidopsis thaliana OX=3702 GN=UCR1-2 PE=1 S	30.5947	30.6613	30.6774	30.7821	30.6434	30.5311	30.5538	30.6724		0.747505	0.0786872
0.179029	0.918158	CIP1	sp|F4JZY1|CIP1_ARATH COP1-interactive protein 1 OS=Arabidopsis thaliana OX=3702 GN=CIP1 PE=1 SV=1	25.0678	25.1228	25.1905	25.0429	25.2937	25.272	25.34	25.0111		0.747077	-0.123186
0.179037	0.94955	RPL35A	sp|Q9SF53|RL351_ARATH 60S ribosomal protein L35-1 OS=Arabidopsis thaliana OX=3702 GN=RPL35A PE=2 SV=1	30.8265	30.7801	30.6588	30.8159	30.8695	30.8082	30.7836	30.9188		0.747058	-0.0746841
0.179225	0.697997	XYL1	sp|Q9S7Y7|XYL1_ARATH Alpha-xylosidase 1 OS=Arabidopsis thaliana OX=3702 GN=XYL1 PE=1 SV=1	27.7923	27.8019	27.5254	28.7153	28.2038	28.4626	28.1381	29.1052		0.7466	-0.518707
0.179227	1.11387	QPT	sp|Q9ZU32|NADC_ARATH Nicotinate-nucleotide pyrophosphorylase [carboxylating], chloroplastic OS=Arabidopsis thaliana OX=3702 GN=QPT PE=2 SV=2	27.2945	27.3776	27.4229	27.0156	27.2294	27.1688	27.0401	27.05		0.746596	0.155579
0.179811	0.903198		sp|Q9SZY1|NACA4_ARATH Nascent polypeptide-associated complex subunit alpha-like protein 4 OS=Arabidopsis thaliana OX=3702 GN=At4g10480 PE=1 SV=1	29.3011	29.2709	29.1513	29.5138	29.3893	29.3661	29.4368	29.6325		0.745183	-0.146886
0.180086	0.877398		sp|Q9LRP6|PP234_ARATH Pentatricopeptide repeat-containing protein At3g15590, mitochondrial OS=Arabidopsis thaliana OX=3702 GN=At3g15590 PE=1 SV=1	25.4176	25.264	25.5903	25.3774	25.6549	25.8709	25.4028	25.4755		0.744521	-0.188696
0.180124	0.538016	NPSN13;NPSN12	sp|Q9LNH6|NPS12_ARATH Novel plant SNARE 12 OS=Arabidopsis thaliana OX=3702 GN=NPSN12 PE=2 SV=1;sp|Q9LRP1|NPS13_ARATH Novel plant SNARE 13 OS=Arabidopsis thaliana OX=3702 GN=NPSN13 PE=1 SV=1	22.3134	24.8914	24.6179	24.0417	25.0102	25.0717	24.7832	24.5764		0.74443	-0.894279
0.180186	1.06733	PRS4	sp|Q680A5|KPRS4_ARATH Ribose-phosphate pyrophosphokinase 4 OS=Arabidopsis thaliana OX=3702 GN=PRS4 PE=1 SV=2	28.9683	28.8529	28.8015	28.7805	28.7792	28.7443	28.6419	28.862		0.74428	0.0939999
0.180586	0.850633	PME44	sp|Q9SMY7|PME44_ARATH Probable pectinesterase/pectinesterase inhibitor 44 OS=Arabidopsis thaliana OX=3702 GN=PME44 PE=2 SV=2	25.6424	25.3356	25.6507	25.1238	25.7259	25.7909	25.7524	25.4168		0.743316	-0.233391
0.18097	2.7244	JAL12	sp|Q0WMR0|JAL12_ARATH Jacalin-related lectin 12 OS=Arabidopsis thaliana OX=3702 GN=JAL12 PE=2 SV=1	25.1669	25.4796	28.2752	24.6811	23.6324	24.8322	25.7252	23.6292		0.742393	1.44594
0.181065	1.07674	CCT4	sp|Q9LV21|TCPD_ARATH T-complex protein 1 subunit delta OS=Arabidopsis thaliana OX=3702 GN=CCT4 PE=1 SV=1	29.6045	29.5482	29.4721	29.5998	29.4292	29.4833	29.29	29.5954		0.742167	0.106668
0.181445	0.771327	UBP9;UBP10	sp|Q93Y01|UBP9_ARATH Ubiquitin carboxyl-terminal hydrolase 9 OS=Arabidopsis thaliana OX=3702 GN=UBP9 PE=2 SV=1;sp|Q9ZSB5|UBP10_ARATH Ubiquitin carboxyl-terminal hydrolase 10 OS=Arabidopsis thaliana OX=3702 GN=UBP10 PE=2 SV=2	24.5641	23.9813	24.3664	24.7671	24.3542	24.739	24.8407	25.2433		0.741254	-0.374585
0.181998	0.529733		sp|Q9C5R8|BAS1B_ARATH 2-Cys peroxiredoxin BAS1-like, chloroplastic OS=Arabidopsis thaliana OX=3702 GN=At5g06290 PE=2 SV=3	26.1041	26.1361	25.8931	24.0956	26.0863	26.2955	27.532	25.9816		0.739934	-0.916663
0.183251	1.07152	AXS2	sp|Q9SGE0|AXS2_ARATH UDP-D-apiose/UDP-D-xylose synthase 2 OS=Arabidopsis thaliana OX=3702 GN=AXS2 PE=2 SV=1	29.6907	29.706	29.572	29.7526	29.5286	29.534	29.5178	29.7422		0.736954	0.0996552
0.183627	0.884612	VTI11	sp|Q9SEL6|VTI11_ARATH Vesicle transport v-SNARE 11 OS=Arabidopsis thaliana OX=3702 GN=VTI11 PE=1 SV=2	25.3458	25.2856	25.4854	25.3505	25.5946	25.23	25.7436	25.6066		0.736064	-0.176884
0.183752	0.849216	CESA3	sp|Q941L0|CESA3_ARATH Cellulose synthase A catalytic subunit 3 [UDP-forming] OS=Arabidopsis thaliana OX=3702 GN=CESA3 PE=1 SV=2	25.8813	26.0019	25.8785	26.2937	26.3155	26.1834	25.956	26.5436		0.735769	-0.235797
0.183848	0.523961	SBP3	sp|Q9LK38|SEBP3_ARATH Selenium-binding protein 3 OS=Arabidopsis thaliana OX=3702 GN=SBP3 PE=2 SV=1	26.4833	26.2296	23.9579	26.5271	26.9023	26.7659	26.664	26.5956		0.73554	-0.932468
0.184031	1.1237		sp|Q94A40|COPA1_ARATH Coatomer subunit alpha-1 OS=Arabidopsis thaliana OX=3702 GN=At1g62020 PE=2 SV=2	27.943	27.9997	27.7157	28.0134	27.8009	27.7739	27.5029	27.9211		0.735108	0.168254
0.184384	0.874242	At3g26720	sp|P94078|MANA1_ARATH Alpha-mannosidase At3g26720 OS=Arabidopsis thaliana OX=3702 GN=At3g26720 PE=1 SV=1	26.7406	26.531	26.2305	26.5553	26.6972	26.7674	26.508	26.8604		0.734277	-0.193896
0.184572	0.791658	At2g22360	sp|Q9SJZ7|DNJA6_ARATH Chaperone protein dnaJ A6, chloroplastic OS=Arabidopsis thaliana OX=3702 GN=DJA6 PE=2 SV=2	24.1122	23.7996	24.4389	24.1129	24.4463	24.084	24.9535	24.3279		0.733835	-0.33705
0.184594	1.18071		sp|Q93W28|Y4554_ARATH Uncharacterized protein At4g15545 OS=Arabidopsis thaliana OX=3702 GN=At4g15545 PE=1 SV=1	26.2046	26.3499	25.9579	25.9597	26.0443	25.9583	26.011	25.4998		0.733784	0.239652
0.185171	0.42046	SR45	sp|Q9SEE9|SR45_ARATH Serine/arginine-rich splicing factor SR45 OS=Arabidopsis thaliana OX=3702 GN=SR45 PE=1 SV=1	24.2383	23.3334	26.1624	26.0139	26.8561	26.6713	24.8029	26.4175		0.732426	-1.24996
0.185453	1.11562	ACT3;ACT1	sp|P0CJ46|ACT1_ARATH Actin-1 OS=Arabidopsis thaliana OX=3702 GN=ACT1 PE=1 SV=1;sp|P0CJ47|ACT3_ARATH Actin-3 OS=Arabidopsis thaliana OX=3702 GN=ACT3 PE=1 SV=1	28.542	28.5335	28.3391	28.5566	28.3391	28.4499	28.0734	28.4774		0.731765	0.157841
0.185797	1.88711	CWINV6	sp|Q8W4S6|INV6_ARATH Beta-fructofuranosidase, insoluble isoenzyme CWINV6 OS=Arabidopsis thaliana OX=3702 GN=CWINV6 PE=2 SV=1	25.6763	26.1318	26.4072	24.339	24.9898	24.7295	25.5544	23.6158		0.730961	0.916178
0.185957	0.920575	TPL	sp|Q94AI7|TPL_ARATH Protein TOPLESS OS=Arabidopsis thaliana OX=3702 GN=TPL PE=1 SV=1	27.3508	27.3714	27.1623	27.3085	27.471	27.5527	27.2487	27.3981		0.730588	-0.119392
0.186497	1.35666	F13K9.4	sp|Q9C7F9|MT127_ARATH Probable methyltransferase At1g27930 OS=Arabidopsis thaliana OX=3702 GN=At1g27930 PE=1 SV=1	25.1343	25.1602	24.9459	25.4362	25.1842	24.9354	24.875	23.9219		0.729327	0.440056
0.186606	0.82447	GPA1	sp|P18064|GPA1_ARATH Guanine nucleotide-binding protein alpha-1 subunit OS=Arabidopsis thaliana OX=3702 GN=GPA1 PE=1 SV=1	25.2807	25.4003	25.1035	25.397	25.7433	25.724	25.0549	25.7731		0.729075	-0.278461
0.186655	0.935289	RPS25E	sp|Q9T029|RS254_ARATH 40S ribosomal protein S25-4 OS=Arabidopsis thaliana OX=3702 GN=RPS25E PE=3 SV=1	31.2834	31.2822	31.094	31.3356	31.2369	31.3581	31.3902	31.396		0.728961	-0.0965152
0.186739	0.609272	ABCB11	sp|Q9FWX7|AB11B_ARATH ABC transporter B family member 11 OS=Arabidopsis thaliana OX=3702 GN=ABCB11 PE=2 SV=1	24.8211	24.3292	24.8286	22.8797	24.8964	24.8648	25.3033	24.6535		0.728764	-0.714841
0.18679	1.10004	OST48	sp|Q944K2|OST48_ARATH Dolichyl-diphosphooligosaccharide--protein glycosyltransferase 48 kDa subunit OS=Arabidopsis thaliana OX=3702 GN=OST48 PE=2 SV=1	29.1208	29.133	28.9547	29.0646	29.0087	28.8927	28.7183	29.1032		0.728645	0.137552
0.186802	1.27231	GSTU9	sp|Q9FUT0|GSTU9_ARATH Glutathione S-transferase U9 OS=Arabidopsis thaliana OX=3702 GN=GSTU9 PE=2 SV=1	27.1257	27.2349	27.2352	26.4281	26.6273	26.8947	26.8025	26.3096		0.728619	0.347445
0.186921	1.08896		sp|Q8LB17|RBL15_ARATH Rhomboid-like protein 15 OS=Arabidopsis thaliana OX=3702 GN=RBL15 PE=1 SV=2	24.8231	24.8334	24.7875	24.9325	24.8016	24.5913	24.5949	24.8969		0.728342	0.122951
0.18741	0.871652		sp|P45434|SSRA_ARATH Translocon-associated protein subunit alpha OS=Arabidopsis thaliana OX=3702 GN=At2g21160 PE=2 SV=3	28.8316	28.653	28.7081	29.0508	28.8273	29.1148	28.8569	29.2374		0.727208	-0.198175
0.187559	1.62782		sp|Q8L5Z4|YBEY_ARATH Endoribonuclease YBEY, chloroplastic OS=Arabidopsis thaliana OX=3702 GN=YBEY PE=1 SV=1	25.1057	25.2315	25.18	24.9376	23.1231	25.1301	25.079	24.3108		0.726863	0.702941
0.187853	1.11826	HEXO3	sp|Q8L7S6|HEXO3_ARATH Beta-hexosaminidase 3 OS=Arabidopsis thaliana OX=3702 GN=HEXO3 PE=1 SV=1	26.8419	26.7459	27.0437	27.0762	26.7432	26.9088	26.5691	26.8416		0.726182	0.161258
0.188025	0.854226	AKR4C9	sp|Q0PGJ6|AKRC9_ARATH NADPH-dependent aldo-keto reductase, chloroplastic OS=Arabidopsis thaliana OX=3702 GN=AKR4C9 PE=1 SV=1	26.9152	27.2103	27.3167	27.1923	27.2521	27.5009	27.111	27.6798		0.725783	-0.227311
0.188045	1.38102	STR18	sp|Q9FKW8|STR18_ARATH Thiosulfate sulfurtransferase 18 OS=Arabidopsis thaliana OX=3702 GN=STR18 PE=1 SV=1	27.7437	27.7017	27.1402	28.0161	27.0448	27.2847	26.5946	27.8148		0.725738	0.465734
0.188768	1.0864	PGM	sp|F4I8M8|GPMA2_ARATH 2,3-bisphosphoglycerate-dependent phosphoglycerate mutase 2 OS=Arabidopsis thaliana OX=3702 GN=gpmA2 PE=2 SV=1	26.7817	26.7427	26.8612	26.5601	26.7326	26.5282	26.6652	26.5414		0.724071	0.11955
0.188781	1.11215	F5I14.18	sp|O04482|UCH2_ARATH Ubiquitin carboxyl-terminal hydrolase 2 OS=Arabidopsis thaliana OX=3702 GN=UCH2 PE=1 SV=1	27.0365	27.2343	26.9827	27.0735	27.0114	27.059	26.6691	26.9741		0.724041	0.153347
0.189003	0.903107		sp|Q9LUV2|POP3_ARATH Stress-response A/B barrel domain-containing protein HS1 OS=Arabidopsis thaliana OX=3702 GN=HS1 PE=1 SV=1	29.2687	28.977	29.1443	29.3876	29.2194	29.3217	29.4009	29.4237		0.723531	-0.147031
0.189727	0.813615	RAN1	sp|Q9S7J8|HMA7_ARATH Copper-transporting ATPase RAN1 OS=Arabidopsis thaliana OX=3702 GN=RAN1 PE=1 SV=1	27.9222	28.1925	28.2754	28.6015	28.1749	28.6125	28.5195	28.8751		0.721871	-0.297581
0.189838	1.28817	FKBP12	sp|Q8LGG0|FKB12_ARATH Peptidyl-prolyl cis-trans isomerase FKBP12 OS=Arabidopsis thaliana OX=3702 GN=FKBP12 PE=1 SV=2	28.8032	28.7921	28.5725	29.0764	28.4412	27.8729	28.4996	28.9693		0.721618	0.365318
0.189862	0.681655	AMT1-3	sp|Q9SQH9|AMT13_ARATH Ammonium transporter 1 member 3 OS=Arabidopsis thaliana OX=3702 GN=AMT1-3 PE=1 SV=2	25.9165	25.8103	25.9036	24.7145	26.1599	26.118	26.7129	25.5656		0.721563	-0.552886
0.191018	0.933283	RPL9B	sp|P49209|RL91_ARATH 60S ribosomal protein L9-1 OS=Arabidopsis thaliana OX=3702 GN=RPL9B PE=1 SV=3	31.1483	31.1801	31.0097	31.1377	31.1738	31.1855	31.1312	31.3836		0.718926	-0.0996132
0.191622	1.10592	At1g15130	sp|F4HXZ1|BRO1_ARATH Vacuolar-sorting protein BRO1 OS=Arabidopsis thaliana OX=3702 GN=BRO1 PE=1 SV=1	27.4672	27.4425	27.6214	27.346	27.2458	27.4724	27.1352	27.4427		0.717554	0.145247
0.19167	1.21538	GSTU24	sp|Q9SHH6|GSTUO_ARATH Glutathione S-transferase U24 OS=Arabidopsis thaliana OX=3702 GN=GSTU24 PE=2 SV=1	30.1794	30.3531	30.6723	29.9034	30.0541	29.9084	30.2514	29.7686		0.717446	0.281409
0.191749	1.20662		sp|O81416|GUN17_ARATH Endoglucanase 17 OS=Arabidopsis thaliana OX=3702 GN=At4g02290 PE=2 SV=1	26.5244	26.2905	26.0617	26.007	26.2781	26.0728	25.8102	25.6385		0.717266	0.270976
0.191874	0.637734	EMB3011	sp|F4K2E9|PRP16_ARATH Pre-mRNA-splicing factor ATP-dependent RNA helicase DEAH7 OS=Arabidopsis thaliana OX=3702 GN=CUV PE=1 SV=1	23.1014	23.0966	23.6699	23.6083	23.1711	24.8737	23.4684	24.559		0.716984	-0.648973
0.192806	1.10502	PFP-ALPHA2	sp|Q9C9K3|PFPA2_ARATH Pyrophosphate--fructose 6-phosphate 1-phosphotransferase subunit alpha 2 OS=Arabidopsis thaliana OX=3702 GN=PFP-ALPHA2 PE=2 SV=1	27.9281	27.9135	27.8933	28.0068	27.7521	27.8629	27.5503	28.0002		0.714879	0.144067
0.193084	0.864998	AP2M	sp|O23140|AP2M_ARATH AP-2 complex subunit mu OS=Arabidopsis thaliana OX=3702 GN=AP2M PE=1 SV=1	26.3145	26.1514	25.9237	26.2734	26.5885	26.4764	26.0649	26.3701		0.714253	-0.209231
0.193412	1.21873	TPS10	sp|O80738|TPS10_ARATH Probable alpha,alpha-trehalose-phosphate synthase [UDP-forming] 10 OS=Arabidopsis thaliana OX=3702 GN=TPS10 PE=2 SV=1	24.5436	24.8423	24.9438	24.8337	24.1514	24.9472	24.3162	24.6071		0.713518	0.285376
0.193419	1.06266	OEP37	sp|O80565|OEP37_ARATH Outer envelope pore protein 37, chloroplastic OS=Arabidopsis thaliana OX=3702 GN=OEP37 PE=2 SV=2	27.0751	27.0729	26.8854	26.8856	26.9574	26.8997	26.8394	26.8719		0.713501	0.0876808
0.193555	1.08788		sp|Q93WJ8|MDAR2_ARATH Monodehydroascorbate reductase 2 OS=Arabidopsis thaliana OX=3702 GN=MDAR2 PE=1 SV=1	30.3542	30.4407	30.3236	30.4021	30.2407	30.3422	30.0452	30.4063		0.713196	0.121524
0.193672	1.78243	UBC7	sp|Q42540|UBC7_ARATH Ubiquitin-conjugating enzyme E2 7 OS=Arabidopsis thaliana OX=3702 GN=UBC7 PE=1 SV=1	26.9473	27.0378	26.7922	26.9249	26.7196	26.9507	26.2502	24.4462		0.712934	0.833842
0.194097	1.13248	ALDH22A1	sp|Q0WSF1|AL221_ARATH Aldehyde dehydrogenase 22A1 OS=Arabidopsis thaliana OX=3702 GN=ALDH22A1 PE=2 SV=2	25.678	25.5593	25.4701	25.8319	25.4341	25.5581	25.1989	25.6302		0.711982	0.179482
0.194364	0.948933	GAMMACA3	sp|Q94AU7|GCA3_ARATH Gamma carbonic anhydrase 3, mitochondrial OS=Arabidopsis thaliana OX=3702 GN=GAMMACA3 PE=1 SV=1	27.8794	27.8064	27.832	27.7519	27.9063	27.7733	27.9882	27.9044		0.711383	-0.0756211
0.194423	1.14019	UGT74B1	sp|O48676|U74B1_ARATH UDP-glycosyltransferase 74B1 OS=Arabidopsis thaliana OX=3702 GN=UGT74B1 PE=1 SV=1	28.1736	28.2322	28.0319	27.9699	28.1446	27.9554	27.5968	27.9537		0.711252	0.189271
0.194748	0.813126	MBF1A;MBF1B	sp|Q9LXT3|MBF1B_ARATH Multiprotein-bridging factor 1b OS=Arabidopsis thaliana OX=3702 GN=MBF1B PE=1 SV=1;sp|Q9SJI8|MBF1A_ARATH Multiprotein-bridging factor 1a OS=Arabidopsis thaliana OX=3702 GN=MBF1A PE=2 SV=1	27.4514	27.5813	27.8366	27.1536	27.8264	28.0159	27.3814	27.9931		0.710526	-0.298449
0.194896	1.15035	RGTB1;T21B14.11	sp|Q84J75|PG2B1_ARATH Geranylgeranyl transferase type-2 subunit beta 1 OS=Arabidopsis thaliana OX=3702 GN=RGTB1 PE=1 SV=1;sp|Q9LHL5|PGTB2_ARATH Geranylgeranyl transferase type-2 subunit beta 2 OS=Arabidopsis thaliana OX=3702 GN=RGTB2 PE=1 SV=1	26.2636	26.2355	25.9639	26.0528	25.905	26.0707	25.6021	26.1297		0.710197	0.202077
0.194938	1.14739	GSTU25	sp|Q9SHH7|GSTUP_ARATH Glutathione S-transferase U25 OS=Arabidopsis thaliana OX=3702 GN=GSTU25 PE=1 SV=1	30.5237	30.5167	30.9006	30.2885	30.4424	30.2173	30.3994	30.3769		0.710102	0.19835
0.194988	0.905102	RPL6B;RPL6C	sp|Q9C9C5|RL63_ARATH 60S ribosomal protein L6-3 OS=Arabidopsis thaliana OX=3702 GN=RPL6C PE=2 SV=1;sp|Q9C9C6|RL62_ARATH 60S ribosomal protein L6-2 OS=Arabidopsis thaliana OX=3702 GN=RPL6B PE=2 SV=1	30.243	30.238	30.0145	30.4468	30.3808	30.2684	30.3848	30.4836		0.709991	-0.143848
0.195314	0.921687	RPS7A	sp|Q9C514|RS71_ARATH 40S ribosomal protein S7-1 OS=Arabidopsis thaliana OX=3702 GN=RPS7A PE=2 SV=1	29.5647	29.6347	29.5636	29.6619	29.8076	29.7934	29.4937	29.8008		0.709267	-0.117651
0.195361	1.09724	NAPRT2	sp|Q84WV8|NPRT2_ARATH Nicotinate phosphoribosyltransferase 2 OS=Arabidopsis thaliana OX=3702 GN=NAPRT2 PE=2 SV=1	26.1746	26.3068	26.4396	26.0595	26.1234	26.2177	26.0227	26.0811		0.709163	0.133873
0.196012	0.822664	GDPD5	sp|Q9C907|GDPD5_ARATH Glycerophosphodiester phosphodiesterase GDPD5 OS=Arabidopsis thaliana OX=3702 GN=GDPD5 PE=2 SV=1	26.6153	26.4987	26.6687	26.9421	26.8521	27.1404	26.5434	27.3153		0.707716	-0.281624
0.19636	0.91838	COX6B-1	sp|Q9S7L9|CX6B1_ARATH Cytochrome c oxidase subunit 6b-1 OS=Arabidopsis thaliana OX=3702 GN=COX6B-1 PE=1 SV=1	29.2523	28.977	29.1668	29.3367	29.3637	29.2052	29.3185	29.3369		0.706946	-0.122836
0.196404	0.948347	ARP1	sp|P17094|RL31_ARATH 60S ribosomal protein L3-1 OS=Arabidopsis thaliana OX=3702 GN=ARP1 PE=1 SV=5	31.0997	31.0103	30.9422	31.1436	31.1612	31.0739	31.0844	31.1823		0.70685	-0.0765123
0.196928	1.12402	PEX7	sp|Q9XF57|PEX7_ARATH Peroxisome biogenesis protein 7 OS=Arabidopsis thaliana OX=3702 GN=PEX7 PE=1 SV=2	25.3004	25.2383	25.2035	25.4398	25.4096	25.0702	24.9118	25.1158		0.705692	0.168673
0.197109	0.917721		sp|P0DKL4|S130A_ARATH Spliceosome-associated protein 130 A OS=Arabidopsis thaliana OX=3702 GN=SAP130A PE=2 SV=1;sp|P0DKL6|S130B_ARATH Spliceosome-associated protein 130 B OS=Arabidopsis thaliana OX=3702 GN=SAP130B PE=2 SV=1	26.7908	26.8703	26.7628	26.7643	27.0099	26.9618	26.6802	27.0319		0.705293	-0.123873
0.197255	0.886164	EMB2360	sp|P42770|GSHRP_ARATH Glutathione reductase, chloroplastic OS=Arabidopsis thaliana OX=3702 GN=EMB2360 PE=2 SV=1	26.5856	26.5447	26.6024	26.2842	26.5972	26.7633	26.893	26.4608		0.704973	-0.174354
0.197375	1.56125	KTI12	sp|Q9LMH0|KTI12_ARATH Protein KTI12 homolog OS=Arabidopsis thaliana OX=3702 GN=KTI12 PE=1 SV=1	24.917	25.1886	24.9713	25.1284	24.8187	24.959	23.0984	24.7583		0.704708	0.642703
0.197817	1.11792	CYP18-3	sp|P34790|CP18C_ARATH Peptidyl-prolyl cis-trans isomerase CYP18-3 OS=Arabidopsis thaliana OX=3702 GN=CYP18-3 PE=1 SV=1	32.1751	31.9873	31.9815	32.3061	31.9063	31.9996	31.7641	32.1367		0.703736	0.160813
0.197831	0.685904	TRX4	sp|Q39239|TRXH4_ARATH Thioredoxin H4 OS=Arabidopsis thaliana OX=3702 GN=TRX4 PE=1 SV=2	25.6409	25.4723	24.1185	25.6383	25.7002	25.939	25.5968	25.8097		0.703706	-0.543921
0.198036	1.11234	RPP3B	sp|Q9LVC9|RLA32_ARATH 60S acidic ribosomal protein P3-2 OS=Arabidopsis thaliana OX=3702 GN=RPP3B PE=2 SV=1	30.6239	30.5406	30.471	30.7059	30.5761	30.1678	30.4346	30.5484		0.703256	0.153601
0.198202	0.894322	RH53	sp|Q9LUW5|RH53_ARATH DEAD-box ATP-dependent RNA helicase 53, mitochondrial OS=Arabidopsis thaliana OX=3702 GN=RH53 PE=1 SV=1	27.4384	27.4668	27.5143	27.2783	27.8272	27.6184	27.3473	27.5495		0.702893	-0.161134
0.198576	0.708217	HEMC	sp|Q43316|HEM3_ARATH Porphobilinogen deaminase, chloroplastic OS=Arabidopsis thaliana OX=3702 GN=HEMC PE=1 SV=1	27.7808	27.7507	27.8737	27.6321	27.8636	28.0044	29.2753	27.885		0.702074	-0.497737
0.198705	0.548799	ADT1	sp|Q9SA96|AROD1_ARATH Arogenate dehydratase/prephenate dehydratase 1, chloroplastic OS=Arabidopsis thaliana OX=3702 GN=ADT1 PE=1 SV=1	24.0251	23.1008	25.0531	22.9752	25.0946	24.9063	23.593	25.0229		0.701792	-0.86565
0.198747	0.921108	PURA	sp|Q96529|PURA_ARATH Adenylosuccinate synthetase, chloroplastic OS=Arabidopsis thaliana OX=3702 GN=PURA PE=1 SV=1	28.874	29.0325	28.9735	29.0761	28.9467	29.0468	29.175	29.2618		0.701699	-0.118558
0.198846	0.927566	TUBB4	sp|P24636|TBB4_ARATH Tubulin beta-4 chain OS=Arabidopsis thaliana OX=3702 GN=TUBB4 PE=2 SV=2	28.8392	28.6402	28.7534	28.842	28.829	28.7521	28.902	29.0256		0.701483	-0.108478
0.198917	0.915053	GAPCP1	sp|Q9SAJ6|G3PP1_ARATH Glyceraldehyde-3-phosphate dehydrogenase GAPCP1, chloroplastic OS=Arabidopsis thaliana OX=3702 GN=GAPCP1 PE=1 SV=1	30.5796	30.3642	30.585	30.4066	30.774	30.6659	30.5374	30.4704		0.701327	-0.128073
0.199194	0.731341	RH20	sp|Q9C718|RH20_ARATH DEAD-box ATP-dependent RNA helicase 20 OS=Arabidopsis thaliana OX=3702 GN=RH20 PE=2 SV=1	24.9824	25.9742	25.8154	26.2618	26.4827	26.2649	25.7831	26.3086		0.700723	-0.451384
0.199356	1.67191	PDIL5-1	sp|Q8GYD1|PDI51_ARATH Protein disulfide-isomerase 5-1 OS=Arabidopsis thaliana OX=3702 GN=PDIL5-1 PE=2 SV=1	26.0257	26.0275	26.0148	26.1268	23.7954	25.5338	25.976	25.9236		0.700371	0.7415
0.199536	1.26578	HSP90-1	sp|P27323|HS901_ARATH Heat shock protein 90-1 OS=Arabidopsis thaliana OX=3702 GN=HSP90-1 PE=1 SV=3	26.868	27.0886	26.4468	26.9401	26.7123	26.5831	25.9317	26.7563		0.699978	0.340027
0.199584	0.457178	PDX11	sp|O80448|PDX11_ARATH Pyridoxal 5-phosphate synthase subunit PDX1.1 OS=Arabidopsis thaliana OX=3702 GN=PDX11 PE=1 SV=1	23.9612	24.6428	24.5946	22.5698	24.5411	24.3425	26.9174	24.4841		0.699873	-1.12917
0.200256	0.889444		sp|Q9C977|PP135_ARATH Pentatricopeptide repeat-containing protein At1g80270, mitochondrial OS=Arabidopsis thaliana OX=3702 GN=At1g80270 PE=2 SV=1	28.6531	28.4007	28.3307	28.4726	28.6753	28.6813	28.3648	28.8117		0.698415	-0.169024
0.200452	0.824693	PATL4	sp|Q94C59|PATL4_ARATH Patellin-4 OS=Arabidopsis thaliana OX=3702 GN=PATL4 PE=1 SV=2	27.1159	26.9193	26.3246	27.0037	26.9692	27.2539	26.9979	27.2549		0.69799	-0.27807
0.200661	0.933589		sp|Q9SZX3|ASSY_ARATH Argininosuccinate synthase, chloroplastic OS=Arabidopsis thaliana OX=3702 GN=At4g24830 PE=1 SV=3	29.0133	28.974	28.9698	29.0901	29.145	29.2009	28.9248	29.1731		0.697538	-0.0991402
0.200746	0.163071	PSBQ2	sp|Q41932|PSBQ2_ARATH Oxygen-evolving enhancer protein 3-2, chloroplastic OS=Arabidopsis thaliana OX=3702 GN=PSBQ2 PE=1 SV=2	22.3239	24.2318	22.167	22.2288	23.8111	24.1234	30.5524	22.9302		0.697353	-2.61643
0.200786	1.12692	DRT101	sp|P57750|AGM1_ARATH Phosphoacetylglucosamine mutase OS=Arabidopsis thaliana OX=3702 GN=DRT101 PE=1 SV=1	26.0291	26.1771	25.9925	25.9338	25.9764	26.0433	25.5547	25.8686		0.697266	0.172381
0.201393	0.908502		sp|Q8L6Z4|RPS9M_ARATH 30S ribosomal protein S9, mitochondrial OS=Arabidopsis thaliana OX=3702 GN=RPS9M PE=1 SV=1	26.3922	26.2277	26.2305	26.4958	26.5646	26.505	26.2667	26.5636		0.695956	-0.138439
0.201429	1.08934	RPN9A	sp|Q8RWF0|PS13A_ARATH 26S proteasome non-ATPase regulatory subunit 13 homolog A OS=Arabidopsis thaliana OX=3702 GN=RPN9A PE=1 SV=1	27.921	27.9765	27.8001	27.8	27.7184	27.7525	27.588	27.9449		0.695879	0.123454
0.201604	0.47797	At1g69790	sp|Q5XF79|PBL18_ARATH Probable serine/threonine-protein kinase PBL18 OS=Arabidopsis thaliana OX=3702 GN=PBL18 PE=2 SV=1	23.4635	26.1545	26.545	26.3702	26.9171	26.9281	26.6546	26.2936		0.695502	-1.06501
0.201634	0.842888	ABCC5	sp|Q7GB25|AB5C_ARATH ABC transporter C family member 5 OS=Arabidopsis thaliana OX=3702 GN=ABCC5 PE=2 SV=2	24.6616	25.15	25.13	25.2657	25.0773	25.2566	25.2626	25.5972		0.695436	-0.246588
0.201888	0.875467	NFYC9;NFYC3	sp|Q8L4B2|NFYC9_ARATH Nuclear transcription factor Y subunit C-9 OS=Arabidopsis thaliana OX=3702 GN=NFYC9 PE=1 SV=1;sp|Q9ZVL3|NFYC3_ARATH Nuclear transcription factor Y subunit C-3 OS=Arabidopsis thaliana OX=3702 GN=NFYC3 PE=1 SV=1	26.1597	26.1002	26.4861	25.9211	26.3987	26.4624	26.1734	26.4002		0.694889	-0.191876
0.202335	1.18902	CAM6;CAM5;CAM7;CAM3;CAM2	s;sp|P59220|CALM7_ARATH Calmodulin-7 OS=Arabidopsis thaliana OX=3702 GN=CAM7 PE=1 SV=2;sp|Q03509|CALM6_ARATH Calmodulin-6 OS=Arabidopsis thaliana OX=3702 GN=CAM6 PE=1 SV=2;sp|Q682T9|CALM5_ARATH Calmodulin-5 OS=Arabidopsis thaliana OX=3702 GN=CAM5 PE=1 SV=1	30.4779	30.4117	30.8025	30.7101	30.1172	30.1671	30.7675	30.3512		0.693928	0.249775
0.20253	0.892369	At3g11964	sp|F4J8K6|RRP5_ARATH rRNA biogenesis protein RRP5 OS=Arabidopsis thaliana OX=3702 GN=RRP5 PE=2 SV=2	25.411	25.6394	25.5521	25.199	25.6128	25.7625	25.4552	25.628		0.69351	-0.164288
0.20269	0.910773	ASN3	sp|Q9LFU1|ASNS3_ARATH Asparagine synthetase [glutamine-hydrolyzing] 3 OS=Arabidopsis thaliana OX=3702 GN=ASN3 PE=2 SV=1	26.1054	26.156	25.8786	26.1459	26.2219	26.3305	26.0134	26.2594		0.693168	-0.134837
0.202779	1.10013		sp|Q8RWN9|ODP22_ARATH Dihydrolipoyllysine-residue acetyltransferase component 2 of pyruvate dehydrogenase complex, mitochondrial OS=Arabidopsis thaliana OX=3702 GN=At3g13930 PE=1 SV=2	30.2972	30.2839	30.4033	30.1	30.2979	30.0501	30.2078	29.978		0.692976	0.137671
0.203122	0.902767	LTA2	sp|Q9SQI8|ODP24_ARATH Dihydrolipoyllysine-residue acetyltransferase component 4 of pyruvate dehydrogenase complex, chloroplastic OS=Arabidopsis thaliana OX=3702 GN=LTA2 PE=2 SV=1	28.9574	28.8905	28.8634	29.1538	29.1025	29.125	28.9186	29.3092		0.692243	-0.147574
0.203763	0.812242	CYP74A	sp|Q96242|CP74A_ARATH Allene oxide synthase, chloroplastic OS=Arabidopsis thaliana OX=3702 GN=CYP74A PE=1 SV=3	25.0504	25.2187	24.9914	24.9452	25.2087	25.1849	25.949	25.0632		0.690875	-0.300018
0.203821	0.923574	FRO1	sp|Q9FJW4|NDUS4_ARATH NADH dehydrogenase [ubiquinone] iron-sulfur protein 4, mitochondrial OS=Arabidopsis thaliana OX=3702 GN=FRO1 PE=1 SV=1	28.6148	28.6688	28.7262	28.6058	28.8936	28.8759	28.7371	28.568		0.690751	-0.1147
0.203821	0.862219		sp|Q9M8T3|Y2910_ARATH Putative gamma-glutamylcyclotransferase At3g02910 OS=Arabidopsis thaliana OX=3702 GN=At3g02910 PE=2 SV=2	26.2772	26.4605	26.6835	26.1348	26.8288	26.6211	26.5805	26.3811		0.690751	-0.213873
0.203883	0.618116	ISPH	sp|Q94B35|ISPH_ARATH 4-hydroxy-3-methylbut-2-enyl diphosphate reductase, chloroplastic OS=Arabidopsis thaliana OX=3702 GN=ISPH PE=1 SV=1	25.2819	25.2527	23.2167	24.7595	25.2598	25.2903	25.4338	25.3032		0.69062	-0.694049
0.205208	1.09523	PBD1	sp|O23714|PSB2A_ARATH Proteasome subunit beta type-2-A OS=Arabidopsis thaliana OX=3702 GN=PBD1 PE=1 SV=1	27.8108	27.7634	27.671	27.7134	27.8061	27.6869	27.4071	27.5336		0.687807	0.131237
0.20521	1.16413	PDIL1-3	sp|Q8VX13|PDI13_ARATH Protein disulfide isomerase-like 1-3 OS=Arabidopsis thaliana OX=3702 GN=PDIL1-3 PE=2 SV=1	27.9201	27.9298	27.81	28.2701	27.6945	27.8567	27.4744	28.0273		0.687802	0.219255
0.205236	1.1257	F28O16.16	sp|Q9SRD4|IGMT5_ARATH Indole glucosinolate O-methyltransferase 5 OS=Arabidopsis thaliana OX=3702 GN=IGMT5 PE=2 SV=1	29.3897	29.3258	28.9993	29.2582	29.2093	28.9225	28.9303	29.2276		0.687746	0.170825
0.205443	1.09936	URH2	sp|Q8LAC4|URH2_ARATH Probable uridine nucleosidase 2 OS=Arabidopsis thaliana OX=3702 GN=URH2 PE=2 SV=1	27.3205	27.3947	27.2606	27.2202	27.1325	27.2669	26.9259	27.3241		0.687308	0.136664
0.205655	1.10459		sp|Q9SV20|COPB2_ARATH Coatomer subunit beta-2 OS=Arabidopsis thaliana OX=3702 GN=At4g31490 PE=2 SV=2	29.1923	29.0797	29.0986	29.2524	29.0473	28.9817	28.7854	29.2345		0.686862	0.143516
0.205752	0.953291	FMT	sp|F4J5S1|CLU_ARATH Clustered mitochondria protein OS=Arabidopsis thaliana OX=3702 GN=FMT PE=2 SV=1	28.2515	28.2837	28.3914	28.2972	28.405	28.2606	28.4178	28.4165		0.686657	-0.0690112
0.205917	1.07784	RBP45C	sp|Q93W34|RP45C_ARATH Polyadenylate-binding protein RBP45C OS=Arabidopsis thaliana OX=3702 GN=RBP45C PE=2 SV=1	28.4617	28.3182	28.4581	28.2765	28.4058	28.3268	28.1383	28.2112		0.686307	0.108137
0.206006	0.626686	MOB1A;MOB1B	sp|Q8GYX0|MOB1B_ARATH MOB kinase activator-like 1B OS=Arabidopsis thaliana OX=3702 GN=MOB1B PE=2 SV=1;sp|Q9FHI1|MOB1A_ARATH MOB kinase activator-like 1A OS=Arabidopsis thaliana OX=3702 GN=MOB1A PE=2 SV=1	24.9102	24.913	23.5021	24.8256	24.8458	26.1864	24.8392	24.9762		0.68612	-0.674185
0.206097	1.25184	KIN2	sp|P31169|KIN2_ARATH Stress-induced protein KIN2 OS=Arabidopsis thaliana OX=3702 GN=KIN2 PE=2 SV=1	26.6199	26.0793	25.952	26.6842	25.8758	26.0823	26.3462	25.7349		0.685929	0.324049
0.206789	0.863756	RBG6	sp|Q9FZ84|RBG6_ARATH Glycine-rich RNA-binding protein 6, mitochondrial OS=Arabidopsis thaliana OX=3702 GN=RBG6 PE=2 SV=1	26.9776	26.998	26.83	27.2535	27.2619	27.2862	26.8906	27.4656		0.684473	-0.211305
0.206942	1.08945		sp|Q93ZE5|FAHD1_ARATH Probable acylpyruvase FAHD1, mitochondrial OS=Arabidopsis thaliana OX=3702 GN=FAHD1 PE=1 SV=1	27.5349	27.6449	27.5938	27.3783	27.5169	27.5309	27.3466	27.263		0.684152	0.123599
0.207195	1.12827	At1g31780	sp|Q6NMI3|COG6_ARATH Conserved oligomeric Golgi complex subunit 6 OS=Arabidopsis thaliana OX=3702 GN=COG6 PE=1 SV=1	25.6323	25.9201	25.5388	25.5807	25.5612	25.6244	25.2341	25.5557		0.683622	0.174116
0.207215	1.14706	RPS30A	sp|P49689|RS30_ARATH 40S ribosomal protein S30 OS=Arabidopsis thaliana OX=3702 GN=RPS30A PE=3 SV=3	30.4964	30.3905	30.231	30.2984	30.21	29.7819	30.2913	30.3413		0.683579	0.197943
0.207376	0.906547	NUP155	sp|F4HXV6|NU155_ARATH Nuclear pore complex protein NUP155 OS=Arabidopsis thaliana OX=3702 GN=NUP155 PE=1 SV=1	27.4715	27.4084	27.2946	27.5518	27.6623	27.5896	27.3315	27.709		0.683242	-0.141547
0.207421	0.583274	FTSH2	sp|O80860|FTSH2_ARATH ATP-dependent zinc metalloprotease FTSH 2, chloroplastic OS=Arabidopsis thaliana OX=3702 GN=FTSH2 PE=1 SV=1	26.6002	26.9724	27.2563	26.9012	27.3879	26.7243	29.2266	27.5022		0.683148	-0.777755
0.208165	0.882538	RABG3A	sp|Q948K8|RAG3A_ARATH Ras-related protein RABG3a OS=Arabidopsis thaliana OX=3702 GN=RABG3A PE=2 SV=1	26.658	26.4485	26.3101	26.757	26.6651	26.7287	26.5647	26.9362		0.681593	-0.180269
0.208168	0.635935	TFIIS	sp|Q9ZVH8|RDO2_ARATH Transcription elongation factor TFIIS OS=Arabidopsis thaliana OX=3702 GN=TFIIS PE=1 SV=1	22.6208	24.3817	24.238	24.4711	24.3782	24.8944	24.2782	24.773		0.681586	-0.653049
0.208303	0.883289	CLPC1	sp|Q9FI56|CLPC1_ARATH Chaperone protein ClpC1, chloroplastic OS=Arabidopsis thaliana OX=3702 GN=CLPC1 PE=1 SV=1	28.5614	28.5984	28.6345	28.5318	28.6706	28.6482	29.1323	28.5912		0.681304	-0.179042
0.208506	0.455244	IPMS2	sp|Q9C550|LEU12_ARATH 2-isopropylmalate synthase 2, chloroplastic OS=Arabidopsis thaliana OX=3702 GN=IPMS2 PE=1 SV=1	26.8985	26.8567	26.9891	23.72	27.0748	27.1443	27.2446	27.5418		0.680882	-1.13529
0.210082	1.342		sp|Q9FKC8|MT799_ARATH Probable S-adenosylmethionine-dependent methyltransferase At5g37990 OS=Arabidopsis thaliana OX=3702 GN=At5g37990 PE=3 SV=2	28.4019	28.3568	27.8561	28.6821	28.0894	27.3985	27.6045	28.507		0.677611	0.424387
0.21042	1.25005	CBSCBSPB4;CBSCBSPB5	sp|P0DH79|Y5064_ARATH CBS domain-containing protein CBSCBSPB5 OS=Arabidopsis thaliana OX=3702 GN=CBSCBSPB5 PE=1 SV=1;sp|Q0WLC7|Y5053_ARATH CBS domain-containing protein CBSCBSPB4 OS=Arabidopsis thaliana OX=3702 GN=CBSCBSPB4 PE=1 SV=2	24.9229	25.0196	24.9043	24.7351	24.8911	23.9162	24.7336	24.7531		0.676913	0.321986
0.211018	1.07876	PUX2	sp|Q9ZU93|PUX2_ARATH Plant UBX domain-containing protein 2 OS=Arabidopsis thaliana OX=3702 GN=PUX2 PE=1 SV=2	26.1856	26.3653	26.394	26.2267	26.055	26.1113	26.2876	26.28		0.67568	0.109372
0.211275	0.811707		sp|Q9FZG4|HXKL1_ARATH Hexokinase-like 1 protein OS=Arabidopsis thaliana OX=3702 GN=At1g47840 PE=2 SV=2	25.5412	25.5247	25.4439	25.8854	25.6051	26.2421	25.5331	26.2189		0.675152	-0.300968
0.212069	0.594059	At4g07410	sp|Q8RXU6|PCN_ARATH WD repeat-containing protein PCN OS=Arabidopsis thaliana OX=3702 GN=PCN PE=2 SV=1	25.5369	24.6969	24.0028	23.889	25.5099	25.8747	24.164	25.5823		0.673523	-0.751322
0.212622	1.13868		sp|Q9M2Y6|CGR2_ARATH Probable pectin methylesterase CGR2 OS=Arabidopsis thaliana OX=3702 GN=CGR2 PE=2 SV=1	27.508	27.4253	27.1359	27.5678	27.139	27.3045	27.0062	27.4378		0.672393	0.187366
0.213216	0.699116	TIP1-1	sp|P25818|TIP11_ARATH Aquaporin TIP1-1 OS=Arabidopsis thaliana OX=3702 GN=TIP1-1 PE=1 SV=1	28.9808	28.7386	28.3875	29.9923	29.5677	29.681	29.1494	29.7666		0.671179	-0.516397
0.213443	1.16598		sp|P57741|PFD3_ARATH Probable prefoldin subunit 3 OS=Arabidopsis thaliana OX=3702 GN=At5g49510 PE=1 SV=1	27.485	27.4213	27.2664	27.8555	27.0127	27.4144	27.2695	27.4455		0.670717	0.221542
0.214042	0.944126	PPI1	sp|O23144|PPI1_ARATH Proton pump-interactor 1 OS=Arabidopsis thaliana OX=3702 GN=PPI1 PE=1 SV=2	28.5365	28.5239	28.4413	28.5918	28.6462	28.5968	28.4707	28.7117		0.669501	-0.0829482
0.214123	1.26197	UGT79B9	sp|Q9FN28|U79B9_ARATH UDP-glycosyltransferase 79B9 OS=Arabidopsis thaliana OX=3702 GN=UGT79B9 PE=2 SV=1	26.4234	27.4472	26.733	26.7603	26.6847	26.7001	26.3054	26.3309		0.669337	0.335677
0.214191	1.07427	COX5B-2	sp|Q9SSB8|CX5B2_ARATH Cytochrome c oxidase subunit 5b-2, mitochondrial OS=Arabidopsis thaliana OX=3702 GN=COX5B-2 PE=1 SV=1	28.6041	28.5871	28.6864	28.3921	28.5602	28.4439	28.4864	28.3658		0.669199	0.103351
0.214591	0.85242	VAMP727	sp|Q9M376|VA727_ARATH Vesicle-associated membrane protein 727 OS=Arabidopsis thaliana OX=3702 GN=VAMP727 PE=1 SV=1	25.246	25.0313	24.5847	24.8216	25.2707	25.2227	24.894	25.2177		0.668389	-0.230364
0.214907	1.2203	NUDT7	sp|Q9SU14|NUDT7_ARATH Nudix hydrolase 7 OS=Arabidopsis thaliana OX=3702 GN=NUDT7 PE=1 SV=1	27.6346	27.8287	27.9565	27.286	27.505	27.7512	27.1683	27.1324		0.667749	0.287231
0.215014	0.826585	EXL2	sp|Q9FE06|EXOL2_ARATH Protein EXORDIUM-like 2 OS=Arabidopsis thaliana OX=3702 GN=EXL2 PE=2 SV=1	29.0481	29.101	29.1296	29.0014	29.3638	29.8168	28.8563	29.3423		0.667534	-0.274765
0.216589	1.08603	PYRE-F	sp|Q42586|UMPS_ARATH Uridine 5-monophosphate synthase OS=Arabidopsis thaliana OX=3702 GN=PYRE-F PE=2 SV=2	29.6006	29.7412	29.582	29.7384	29.532	29.4995	29.4001	29.7542		0.664363	0.119058
0.216665	1.25659	LARP1C	sp|Q94K80|LRP1C_ARATH La-related protein 1C OS=Arabidopsis thaliana OX=3702 GN=LARP1C PE=1 SV=1	26.0264	26.6505	26.1665	25.8224	25.4137	26.1045	25.7587	26.0707		0.664211	0.329519
0.216953	1.10631	SYNC3	sp|Q9SSK1|SYNC3_ARATH Asparagine--tRNA ligase, cytoplasmic 3 OS=Arabidopsis thaliana OX=3702 GN=SYNC3 PE=1 SV=1	26.0438	26.2672	26.0874	25.7731	25.9075	25.9511	25.9083	25.8215		0.663634	0.145754
0.217052	0.891157	CSP1	sp|O65639|CSP1_ARATH Cold shock protein 1 OS=Arabidopsis thaliana OX=3702 GN=CSP1 PE=1 SV=1	27.5104	27.2023	27.5231	27.3682	27.5355	27.3568	27.8155	27.5611		0.663436	-0.166248
0.217412	1.16599	RER1A	sp|O48670|RER1A_ARATH Protein RER1A OS=Arabidopsis thaliana OX=3702 GN=RER1A PE=1 SV=1	25.9508	26.1418	25.9801	26.0542	25.9822	25.9514	25.3455	25.9616		0.662716	0.221552
0.217434	0.532432	PGLP2	sp|Q8GWU0|PGP2_ARATH Phosphoglycolate phosphatase 2 OS=Arabidopsis thaliana OX=3702 GN=PGLP2 PE=1 SV=1	23.1777	25.9204	23.9276	24.2869	25.6125	24.2901	25.48	25.5674		0.662673	-0.90933
0.217559	1.12175	T20O10_40	sp|Q9LYC7|OTU5_ARATH OVARIAN TUMOR DOMAIN-containing deubiquitinating enzyme 5 OS=Arabidopsis thaliana OX=3702 GN=OTU5 PE=2 SV=1	26.5395	26.2059	26.5982	26.4424	26.2269	26.2105	26.1576	26.5281		0.662423	0.165751
0.217857	1.14265		sp|Q9LK94|MDAR4_ARATH Monodehydroascorbate reductase 4, peroxisomal OS=Arabidopsis thaliana OX=3702 GN=MDAR4 PE=1 SV=1	26.8386	26.8433	26.9547	26.5703	26.9027	26.6707	26.461	26.4029		0.661828	0.192388
0.217872	1.05965	AMPD	sp|O80452|AMPD_ARATH AMP deaminase OS=Arabidopsis thaliana OX=3702 GN=AMPD PE=1 SV=2	27.2968	27.3282	27.3783	27.2087	27.2431	27.1725	27.117	27.345		0.661798	0.0835881
0.217872	0.900182	IQD32	sp|Q9FXI5|IQD32_ARATH Protein IQ-DOMAIN 32 OS=Arabidopsis thaliana OX=3702 GN=IQD32 PE=1 SV=3	25.1361	25.0897	24.8757	25.1812	25.26	25.155	25.0317	25.4429		0.661798	-0.151712
0.220238	0.905294	NCBP	sp|Q9FK59|IF4E5_ARATH Eukaryotic translation initiation factor NCBP OS=Arabidopsis thaliana OX=3702 GN=NCBP PE=1 SV=1	25.7629	25.6374	25.8214	25.9942	26.1125	26.0064	25.7635	25.9077		0.657107	-0.143541
0.220638	1.05235		sp|Q9FMH8|RD21B_ARATH Probable cysteine protease RD21B OS=Arabidopsis thaliana OX=3702 GN=RD21B PE=1 SV=1	30.6904	30.717	30.6617	30.7686	30.6108	30.6786	30.513	30.7409		0.656319	0.0736189
0.22075	1.09003	CAP1	sp|O65902|ACAP1_ARATH Cyclase-associated protein 1 OS=Arabidopsis thaliana OX=3702 GN=CAP1 PE=2 SV=1	29.3814	29.3326	29.3053	29.5301	29.3201	29.2664	29.0537	29.4119		0.656099	0.12437
0.221384	1.09688	BGLU25	sp|O82772|BGL25_ARATH Probable inactive beta-glucosidase 25 OS=Arabidopsis thaliana OX=3702 GN=BGLU25 PE=2 SV=1	26.862	27.0368	26.7889	26.9281	26.6786	26.9295	26.5862	26.8879		0.654854	0.133411
0.221674	0.710699	CTU2	sp|O65628|CTU2_ARATH Cytoplasmic tRNA 2-thiolation protein 2 OS=Arabidopsis thaliana OX=3702 GN=CTU2 PE=2 SV=3	23.6203	23.6048	24.8124	24.0665	24.5087	23.9217	24.6431	25.0012		0.654285	-0.492689
0.22175	0.896703	ELF5A-3	sp|Q9C505|IF5A3_ARATH Eukaryotic translation initiation factor 5A-3 OS=Arabidopsis thaliana OX=3702 GN=ELF5A-3 PE=2 SV=1	28.0751	28.175	28.3375	27.8773	28.1007	28.4035	28.3161	28.2736		0.654137	-0.157299
0.221941	1.2376	GNL1	sp|Q9FLY5|GNL1_ARATH ARF guanine-nucleotide exchange factor GNL1 OS=Arabidopsis thaliana OX=3702 GN=GNL1 PE=3 SV=1	25.7794	25.7157	25.4239	25.7881	25.4937	25.3546	24.8138	25.8149		0.653763	0.307541
0.222094	1.15007	CMTA5	sp|O23463|CMTA5_ARATH Calmodulin-binding transcription activator 5 OS=Arabidopsis thaliana OX=3702 GN=CAMTA5 PE=2 SV=2	25.8653	25.6718	25.5499	25.579	25.7974	25.17	25.4004	25.4915		0.653463	0.20172
0.222611	0.705863	LTP8	sp|Q9ZPW9|NLTP8_ARATH Non-specific lipid-transfer protein 8 OS=Arabidopsis thaliana OX=3702 GN=LTP8 PE=3 SV=1	27.3486	26.7846	27.3368	27.0557	27.9178	28.191	27.7957	26.6313		0.652453	-0.502539
0.223298	0.904883		sp|Q9FIJ2|NDUA2_ARATH NADH dehydrogenase [ubiquinone] 1 alpha subcomplex subunit 2 OS=Arabidopsis thaliana OX=3702 GN=At5g47890 PE=3 SV=1	29.457	29.3101	29.3338	29.3695	29.663	29.6953	29.2728	29.416		0.651115	-0.144196
0.223455	1.04979	PK	sp|Q8W1X2|PDXK_ARATH Pyridoxal kinase OS=Arabidopsis thaliana OX=3702 GN=PK PE=1 SV=2	26.9333	27.0636	27.1069	26.9529	26.9223	27.0031	26.9802	26.8707		0.650809	0.0700974
0.223955	0.616938	THO2	sp|F4IAT2|THOC2_ARATH THO complex subunit 2 OS=Arabidopsis thaliana OX=3702 GN=THO2 PE=1 SV=1	25.2891	25.3621	23.4663	25.6665	25.4909	25.694	25.4293	25.9569		0.64984	-0.696802
0.224481	1.17318	HIPL2	sp|Q94F08|HIPL2_ARATH HIPL2 protein OS=Arabidopsis thaliana OX=3702 GN=HIPL2 PE=2 SV=2	27.4101	27.5749	27.4529	27.1106	27.4144	27.2511	27.197	26.7643		0.64882	0.23043
0.224528	1.14337	At5g63220	sp|Q6GKV1|GET4_ARATH Protein GET4 OS=Arabidopsis thaliana OX=3702 GN=MDC12.19 PE=1 SV=1	26.3647	25.8367	26.2996	26.1593	25.8857	25.9691	25.8325	26.1998		0.648729	0.193298
0.225231	2.04259	APY2	sp|Q9SPM5|APY2_ARATH Apyrase 2 OS=Arabidopsis thaliana OX=3702 GN=APY2 PE=1 SV=1	25.5121	25.4121	25.4898	25.9275	22.9079	25.5725	23.6725	26.0669		0.647373	1.0304
0.225744	1.07828	GRF5	sp|P42645|14335_ARATH 14-3-3-like protein GF14 upsilon OS=Arabidopsis thaliana OX=3702 GN=GRF5 PE=1 SV=2	31.0725	30.9015	30.9376	31.067	30.762	30.8644	30.8397	31.0775		0.646384	0.108737
0.226119	0.809308	SCPL24	sp|Q9M099|SCP24_ARATH Serine carboxypeptidase 24 OS=Arabidopsis thaliana OX=3702 GN=SCPL24 PE=1 SV=1	26.1028	25.9268	25.6607	26.3454	26.1754	26.4951	25.8983	26.6879		0.645663	-0.30524
0.226272	0.681099	CYP20-3	sp|P34791|CP20C_ARATH Peptidyl-prolyl cis-trans isomerase CYP20-3, chloroplastic OS=Arabidopsis thaliana OX=3702 GN=CYP20-3 PE=1 SV=1	27.9666	27.8941	27.7181	27.9578	28.0252	28.1318	29.6534	27.9425		0.64537	-0.554063
0.226281	1.119	CSY4	sp|P20115|CISY4_ARATH Citrate synthase 4, mitochondrial OS=Arabidopsis thaliana OX=3702 GN=CSY4 PE=1 SV=3	30.2303	30.2908	30.3463	29.9489	30.1784	30.1845	29.9358	29.8688		0.645352	0.162205
0.226288	0.831781	GGH1	sp|Q9SYL6|GGH1_ARATH Gamma-glutamyl hydrolase 1 OS=Arabidopsis thaliana OX=3702 GN=GGH1 PE=2 SV=1	25.3617	25.1575	25.2282	25.2343	25.468	25.5262	25.0551	25.9954		0.645338	-0.265725
0.226589	0.917212	RPL27B	sp|Q8LCL3|RL272_ARATH 60S ribosomal protein L27-2 OS=Arabidopsis thaliana OX=3702 GN=RPL27B PE=2 SV=2	31.3702	31.1265	31.0309	31.2782	31.3955	31.288	31.1944	31.4267		0.64476	-0.124673
0.226722	0.884978	RPS15A	sp|Q08112|RS151_ARATH 40S ribosomal protein S15-1 OS=Arabidopsis thaliana OX=3702 GN=RPS15A PE=2 SV=1	30.9747	31.2541	30.9429	31.4493	31.203	31.447	31.368	31.3082		0.644507	-0.176287
0.227098	1.05863	VPS24-1	sp|Q9FFB3|VP241_ARATH Vacuolar protein sorting-associated protein 24 homolog 1 OS=Arabidopsis thaliana OX=3702 GN=VPS24-1 PE=1 SV=1	25.9264	25.8035	25.9712	25.8838	25.8373	25.7004	25.7819	25.9366		0.643787	0.0822034
0.227643	0.882916	AHA3	sp|P20431|PMA3_ARATH ATPase 3, plasma membrane-type OS=Arabidopsis thaliana OX=3702 GN=AHA3 PE=1 SV=2	29.1967	29.3018	29.5119	29.157	29.4319	29.7709	29.4248	29.2584		0.642747	-0.179652
0.227672	0.897043	At5g13980	sp|Q8LPJ3|MANA2_ARATH Probable alpha-mannosidase At5g13980 OS=Arabidopsis thaliana OX=3702 GN=At5g13980 PE=2 SV=1	26.4996	26.615	26.4615	26.7208	26.6875	26.724	26.5125	26.9998		0.64269	-0.156751
0.228315	1.20954	CAM4;CAM1	sp|P0DH95|CALM1_ARATH Calmodulin-1 OS=Arabidopsis thaliana OX=3702 GN=CAM1 PE=1 SV=1;sp|P0DH96|CALM4_ARATH Calmodulin-4 OS=Arabidopsis thaliana OX=3702 GN=CAM4 PE=1 SV=1	27.6557	27.7217	27.9256	27.5243	26.9991	27.2461	27.698	27.7862		0.641466	0.274458
0.228519	0.79711	RH26;RH25;RH31	sp|Q94C75|RH25_ARATH DEAD-box ATP-dependent RNA helicase 25 OS=Arabidopsis thaliana OX=3702 GN=RH25 PE=2 SV=2;sp|Q9FFQ1|RH31_ARATH DEAD-box ATP-de;sp|Q9FNM7|RH26_ARATH DEAD-box ATP-dependent RNA helicase 26 OS=Arabidopsis thaliana OX=3702 GN=RH26 PE=1 SV=2	24.618	24.6838	24.127	24.3313	24.2569	24.6065	25.1357	25.0696		0.641078	-0.32715
0.228603	1.22886	EXPB3	sp|Q9M0I2|EXPB3_ARATH Expansin-B3 OS=Arabidopsis thaliana OX=3702 GN=EXPB3 PE=2 SV=2	26.0151	26.395	25.534	25.5521	25.7318	25.7035	25.4387	25.4329		0.640917	0.297326
0.228828	1.14583	UXS1	sp|Q8VZC0|UXS1_ARATH UDP-glucuronic acid decarboxylase 1 OS=Arabidopsis thaliana OX=3702 GN=UXS1 PE=1 SV=1	26.4268	26.5526	26.4196	26.7262	26.304	26.4101	26.0059	26.6197		0.640491	0.196389
[truncated: 1,703 more rows]

## Sheet: Supplementary data 3
Supplementary data 3: LFQ intensities of the atg5-1 and WT proteins profile under 1%. LFQ-label-free quantification. Values are presented in log value. Ratio and p-values. were calculated using the Raw LFQ values
[truncated: 3,512 more rows]
